# Supplementary material for: White-Opaque Switching in Natural MTLa/α Isolates of Candida albicans: Evolutionary Implications for Roles in Host Adaptation, Pathogenesis, and Sex
Source: PLOS journal article supplement (doi:10.1371/journal.pbio.1001525), 2013-03-26
Supplement: S8 (10.1371/journal.pbio.1001525.s008) [file journal.pbio.1001525.s008.xls]

## Sheet: CY110_wh-VS-CY110_OP.GeneDiffEx
Table S4. RNA-Seq analysis of white and opaque cells of CY110.
(Results of the differentially expressed ORFs, 1<log2 Ratio(OP_RPKM/Wh_RPKM)<-1) .
GeneID	Gene_length	CY110_wh-Expression	CY110_OP-Expression	CY110_wh-RPKM	CY110_OP-RPKM	log2 Ratio(CY110_OP/CY110_wh)	Up-Down-Regulation(CY110_OP/CY110_wh)	P-value	FDR	GO Component	GO Function	GO Process	Blast nr
orf19.356	792	0	1955	0.001	253.397	17.951	Up	0	0	-	GO:0016765//transferase activity, transferring alkyl or aryl (other than methyl) groups	-	gi|241953121|ref|XP_002419282.1|/6.26949e-151/glutathione S-transferase, putative [Candida dubliniensis CD36]
orf19.2460	1056	0	1641	0.001	159.524	17.2834	Up	0	0	-	-	-	gi|238878963|gb|EEQ42601.1|/1.1874e-127/conserved hypothetical protein [Candida albicans WO-1]
orf19.2833	594	0	419	0.001	72.4115	16.1439	Up	0	0	-	-	-	gi|68480430|ref|XP_715814.1|/8.75555e-17/hypothetical protein CaO19.10351 [Candida albicans SC5314]
orf19.1370	864	0	474	0.001	56.3177	15.7813	Up	0	0	-	-	-	gi|68482828|ref|XP_714640.1|/8.32578e-147/hypothetical protein CaO19.8950 [Candida albicans SC5314]
orf19.6274	528	0	133	0.001	25.8582	14.6583	Up	0	0	-	-	-	gi|68474304|ref|XP_718861.1|/8.35898e-97/hypothetical protein CaO19.6274 [Candida albicans SC5314]
orf19.936	2325	0	377	0.001	16.6456	14.0229	Up	0	0	-	-	-	gi|68478187|ref|XP_716835.1|/0/potential acid sphingomyelin phosphodiesterase [Candida albicans SC5314]
orf19.7608	396	0	64	0.001	16.5907	14.0181	Up	0	0	-	-	-	gi|68473127|ref|XP_719369.1|/7.93025e-23/hypothetical protein CaO19.7608 [Candida albicans SC5314]
orf19.6998	804	0	111	0.001	14.1725	13.7908	Up	0	0	-	GO:0016765//transferase activity, transferring alkyl or aryl (other than methyl) groups	-	gi|68482789|ref|XP_714704.1|/3.30424e-155/potential ER-associated glutathione S-transferase [Candida albicans SC5314]
orf19.937	474	0	65	0.001	14.0772	13.7811	Up	0	0	-	-	-	gi|68478189|ref|XP_716836.1|/1.11759e-74/hypothetical protein CaO19.8552 [Candida albicans SC5314]
orf19.3121	738	0	84	0.001	11.6843	13.5123	Up	0	0	-	GO:0003824//catalytic activity	-	gi|68481170|ref|XP_715500.1|/4.09763e-146/potential glutathione S-transferase [Candida albicans SC5314]
orf19.4508	648	0	50	0.001	7.92091	12.9515	Up	1.9984e-15	9.45683e-15	-	-	-	gi|68486398|ref|XP_712934.1|/3.00829e-112/hypothetical LPF family protein 27 [Candida albicans SC5314]
orf19.1671.1	387	2	13464	0.555088	3571.44	12.6515	Up	0.00011056	0.000192035	-	-	-	-
orf19.4652	312	0	18	0.001	5.9224	12.532	Up	5.83636e-06	1.12389e-05	-	-	-	gi|68466189|ref|XP_722869.1|/6.50806e-41/hypothetical protein CaO19.12122 [Candida albicans SC5314]
orf19.3330.3	399	0	15	0.001	3.85921	11.9141	Up	4.36588e-05	7.83935e-05	-	GO:0016491//oxidoreductase activity;GO:0005496//steroid binding	-	gi|68475075|ref|XP_718423.1|/1.79776e-67/potential peroxisomal lipid carrier [Candida albicans SC5314]
orf19.4819	357	0	12	0.001	3.45059	11.7526	Up	0.000326588	0.000547207	-	-	-	gi|68464855|ref|XP_723505.1|/1.13981e-45/hypothetical protein CaO19.4819 [Candida albicans SC5314]
orf19.3374	816	0	27	0.001	3.39667	11.7299	Up	1.39429e-08	3.13407e-08	-	-	-	gi|1169465|sp|Q07730.2|ECE1_CANAL/1.21912e-120/RecName: Full=Cell elongation protein 1
orf19.4972	1947	6	17564	0.331	926.057	11.4501	Up	1.41012e-05	2.6293e-05	GO:0044464//cell part	GO:0046914//transition metal ion binding	-	gi|68467498|ref|XP_722182.1|/2.08786e-172/potential zinc finger protein [Candida albicans SC5314]
orf19.5303	834	3	7930	0.386365	976.084	11.3028	Up	6.86954e-05	0.000121353	-	-	-	gi|68477587|ref|XP_717106.1|/1.03257e-106/hypothetical LDG family protein 6 [Candida albicans SC5314]
orf19.4884	2358	2	4847	0.0911022	211.013	11.1776	Up	0.00011056	0.000192254	-	-	-	gi|37953509|gb|AAP69996.1|/0/TOS9 [Candida albicans]
orf19.1302	651	0	14	0.001	2.20763	11.1083	Up	8.5385e-05	0.000149711	-	-	-	gi|68486189|ref|XP_709943.1|/2.34931e-80/hypothetical protein CaO19.1302 [Candida albicans SC5314]
orf19.4934	1212	10	14753	0.886217	1249.56	10.4615	Up	1.28466e-06	2.57522e-06	-	-	-	gi|68467424|ref|XP_722145.1|/3.18317e-159/opaque phase-specific protein Ops4 [Candida albicans SC5314]
orf19.5714	1176	17	18603	1.55269	1623.89	10.0305	Up	1.45204e-08	3.25431e-08	-	GO:0004175//endopeptidase activity	GO:0019538//protein metabolic process	gi|68475693|ref|XP_718053.1|/0/secretory aspartyl proteinase SAP1p [Candida albicans SC5314]
orf19.4599	1803	133	142813	7.92317	8131.15	10.0032	Up	1.49214e-13	6.02971e-13	GO:0044464//cell part	GO:0015291//secondary active transmembrane transporter activity	GO:0015698//inorganic anion transport	gi|238881645|gb|EEQ45283.1|/0/phosphate permease PHO89 [Candida albicans WO-1]
orf19.2449	1773	22	17707	1.33277	1025.22	9.58728	Up	5.39168e-10	1.29527e-09	-	-	-	gi|238878955|gb|EEQ42593.1|/5.8187e-158/predicted protein [Candida albicans WO-1]
orf19.4072	3261	257	202317	8.46496	6368.86	9.55532	Up	6.1906e-13	2.11449e-12	-	-	-	gi|68483586|ref|XP_714246.1|/2.15486e-167/hypothetical protein CaO19.4072 [Candida albicans SC5314]
orf19.3232	1566	5	3914	0.342942	256.572	9.54718	Up	2.46456e-05	4.51418e-05	-	-	GO:0006810//transport	gi|68475965|ref|XP_717923.1|/0/hypothetical protein CaO19.3232 [Candida albicans SC5314]
orf19.5144	681	12	9355	1.89268	1410.19	9.54124	Up	3.6595e-07	7.55629e-07	-	-	-	gi|68477927|ref|XP_716967.1|/5.52746e-75/hypothetical protein CaO19.5144 [Candida albicans SC5314]
orf19.1541	2898	9	6321	0.33357	223.907	9.39069	Up	2.37944e-06	4.70197e-06	-	GO:0005488//binding	-	gi|68466777|ref|XP_722584.1|/0/hypothetical protein CaO19.1541 [Candida albicans SC5314]
orf19.5503	330	4	2737	1.30193	851.414	9.35306	Up	4.19108e-05	7.53877e-05	-	-	-	gi|68491327|ref|XP_710531.1|/8.10009e-36/hypothetical protein CaO19.5503 [Candida albicans SC5314]
orf19.5975	861	1	649	0.12475	77.3787	9.27676	Up	0.00057803	0.000944435	GO:0044464//cell part	GO:0046914//transition metal ion binding	-	gi|68465649|ref|XP_723186.1|/7.13614e-82/potential zinc finger protein [Candida albicans SC5314]
orf19.3902	747	8	4759	1.1503	653.996	9.15112	Up	4.36386e-06	8.46199e-06	-	-	-	gi|68467627|ref|XP_721972.1|/1.40385e-125/hypothetical protein CaO19.11383 [Candida albicans SC5314]
orf19.5728	1581	5	2725	0.339689	176.935	9.02479	Up	2.46456e-05	4.51553e-05	GO:0031224//intrinsic to membrane	GO:0004497//monooxygenase activity;GO:0005506//iron ion binding	GO:0008152//metabolic process	gi|68475852|ref|XP_717999.1|/0/potential alkane hydroxylating monooxygenase P450 [Candida albicans SC5314]
orf19.4654	330	1	532	0.325483	165.492	8.98996	Up	0.00057803	0.000942671	-	-	-	gi|238881692|gb|EEQ45330.1|/7.07959e-40/conserved hypothetical protein [Candida albicans WO-1]
orf19.984	1509	7	3518	0.498255	239.324	8.90787	Up	7.90574e-06	1.50672e-05	-	GO:0016791//phosphatase activity	GO:0006796//phosphate-containing compound metabolic process	gi|68489864|ref|XP_711225.1|/0/hypothetical protein CaO19.8599 [Candida albicans SC5314]
orf19.1171	2259	8	3932	0.380379	178.681	8.87573	Up	4.36386e-06	8.45662e-06	-	-	-	-
orf19.6484	459	4	1924	0.936031	430.301	8.84457	Up	4.19108e-05	7.54765e-05	-	-	-	gi|68469076|ref|XP_721325.1|/1.04955e-71/hypothetical LDG family protein 4 [Candida albicans SC5314]
orf19.3897	1263	6	2833	0.510259	230.263	8.81783	Up	1.41012e-05	2.6301e-05	-	-	-	gi|68467617|ref|XP_721967.1|/0/hypothetical protein CaO19.11378 [Candida albicans SC5314]
orf19.1239	987	2	822	0.217648	85.4938	8.61768	Up	0.00011056	0.000192144	-	-	-	gi|68478770|ref|XP_716547.1|/7.14178e-156/hypothetical protein CaO19.1239 [Candida albicans SC5314]
orf19.7071	1545	2	703	0.139041	46.7097	8.39206	Up	0.00011056	0.000192199	GO:0031224//intrinsic to membrane	-	GO:0006810//transport	gi|68471173|ref|XP_720363.1|/0/hypothetical protein CaO19.7071 [Candida albicans SC5314]
orf19.935	1062	2	701	0.202278	67.76	8.38795	Up	0.00011056	0.000191872	-	-	-	gi|68478185|ref|XP_716834.1|/3.86263e-118/hypothetical protein CaO19.8550 [Candida albicans SC5314]
orf19.2738	2481	10	3126	0.432928	129.343	8.22286	Up	1.28466e-06	2.57438e-06	GO:0031224//intrinsic to membrane	GO:0015291//secondary active transmembrane transporter activity	GO:0015698//inorganic anion transport	gi|68471418|ref|XP_720257.1|/0/potential high-affinity sulfate transporter [Candida albicans SC5314]
orf19.5735.3	297	35	9349	12.6577	3231.39	7.996	Up	2.33146e-13	8.90353e-13	-	-	-	gi|6470356|gb|AAC24836.2|/2.42753e-24/polyprotein [Candida albicans]
orf19.6487	459	6	1361	1.40405	304.387	7.76017	Up	1.41012e-05	2.62769e-05	-	-	-	gi|68469082|ref|XP_721328.1|/1.79026e-71/hypothetical LDG family protein 2 [Candida albicans SC5314]
orf19.1124	885	44	9342	5.34013	1083.62	7.66477	Up	7.72716e-14	3.30377e-13	-	GO:0016701//oxidoreductase activity, acting on single donors with incorporation of molecular oxygen	-	gi|68489992|ref|XP_711198.1|/2.26924e-171/hypothetical protein CaO19.8722 [Candida albicans SC5314]
orf19.6486	459	1	211	0.234008	47.19	7.65578	Up	0.00057803	0.000943678	-	-	-	gi|68469080|ref|XP_721327.1|/2.33815e-71/hypothetical LDG family protein 3 [Candida albicans SC5314]
orf19.2451	1389	7	1440	0.541301	106.424	7.61918	Up	7.90574e-06	1.50719e-05	-	-	-	gi|68474864|ref|XP_718473.1|/3.03042e-172/hypothetical protein CaO19.2451 [Candida albicans SC5314]
orf19.2701	519	6	1151	1.24173	227.661	7.51839	Up	1.41012e-05	2.6309e-05	-	-	-	gi|68470892|ref|XP_720453.1|/8.37734e-94/hypothetical protein CaO19.2701 [Candida albicans SC5314]
orf19.2787	1233	8	1491	0.696899	124.135	7.47675	Up	4.36386e-06	8.4593e-06	-	-	-	gi|238878812|gb|EEQ42450.1|/2.02678e-76/predicted protein [Candida albicans WO-1]
orf19.3117	444	61	9841	14.7567	2275.29	7.26853	Up	3.04202e-14	1.36256e-13	-	-	-	gi|68481162|ref|XP_715496.1|/2.03241e-66/potential cell surface antigen [Candida albicans SC5314]
orf19.7094	1581	16	2565	1.087	166.547	7.25942	Up	2.78868e-08	6.15301e-08	GO:0031224//intrinsic to membrane	GO:0022857//transmembrane transporter activity	GO:0071702	gi|68471217|ref|XP_720385.1|/0/potential sugar sensor or transporter [Candida albicans SC5314]
orf19.467	1929	116	17665	6.45905	940.073	7.18531	Up	1.18794e-13	4.92077e-13	-	-	-	gi|68476887|ref|XP_717421.1|/0/hypothetical protein CaO19.8098 [Candida albicans SC5314]
orf19.5392	1530	97	14270	6.80962	957.442	7.13547	Up	7.68274e-14	3.2963e-13	-	-	GO:0006810//transport	gi|68476235|ref|XP_717767.1|/0/hypothetical protein CaO19.5392 [Candida albicans SC5314]
orf19.893	1674	33	4744	2.11739	290.917	7.10218	Up	5.71542e-13	1.97424e-12	-	-	-	gi|68469767|ref|XP_721135.1|/0/hypothetical protein CaO19.8512 [Candida albicans SC5314]
orf19.1409.3	276	1	137	0.389165	50.9556	7.03271	Up	0.00057803	0.000943426	-	-	-	gi|380351581|emb|CCG21804.1|/2.24163e-17/hypothetical protein CORT_0B00830 [Candida orthopsilosis]
orf19.2457	2076	2	273	0.103477	13.4994	7.02744	Up	0.00011056	0.000191926	-	-	-	gi|68474876|ref|XP_718479.1|/0/hypothetical protein CaO19.2457 [Candida albicans SC5314]
orf19.4189	1077	1	122	0.0997303	11.6285	6.86542	Up	0.00057803	0.000943175	-	GO:0003824//catalytic activity	-	gi|68486731|ref|XP_712794.1|/0/possible acid phosphatase [Candida albicans SC5314]
orf19.4279	2403	45	5451	2.01141	232.864	6.85513	Up	1.95399e-14	8.92878e-14	-	GO:0016740//transferase activity	GO:0006464//protein modification process	gi|68470683|ref|XP_720587.1|/0/hypothetical protein CaO19.4279 [Candida albicans SC5314]
orf19.3924	1140	1	114	0.0942189	10.2655	6.76757	Up	0.00057803	0.00094393	-	GO:0003824//catalytic activity	-	gi|68467671|ref|XP_721994.1|/0/potential esterase/lipase [Candida albicans SC5314]
orf19.2156	747	441	49855	63.4104	6851.22	6.7555	Up	5.02264e-13	1.76181e-12	-	GO:0016861//intramolecular oxidoreductase activity, interconverting aldoses and ketoses	GO:0006041//glucosamine metabolic process	gi|353526262|sp|Q04802.2|NAG1_CANAL/4.49513e-140/RecName: Full=Glucosamine-6-phosphate isomerase; AltName: Full=Glucosamine-6-phosphate deaminase; Short=GNPDA; Short=GlcN6P deaminase
orf19.4653	330	1	108	0.325483	33.5962	6.68957	Up	0.00057803	0.000942923	-	-	-	gi|68466191|ref|XP_722870.1|/3.17788e-40/hypothetical protein CaO19.12123 [Candida albicans SC5314]
orf19.5302	1059	37	3877	3.75274	375.82	6.64595	Up	1.39222e-13	5.65584e-13	-	-	-	gi|68477585|ref|XP_717105.1|/9.68905e-154/hypothetical LDG family protein 5 [Candida albicans SC5314]
orf19.938	1446	13	1220	0.965646	86.6107	6.48691	Up	1.93548e-07	4.0693e-07	-	-	-	gi|68478191|ref|XP_716837.1|/0/hypothetical protein CaO19.8553 [Candida albicans SC5314]
orf19.7455	1080	3	278	0.29836	26.4242	6.46866	Up	6.86954e-05	0.000121248	-	-	-	gi|68479897|ref|XP_716116.1|/0/hypothetical protein CaO19.7455 [Candida albicans SC5314]
orf19.6224	1494	2	171	0.143788	11.7497	6.35253	Up	0.00011056	0.00019209	-	-	-	gi|68474208|ref|XP_718813.1|/0/potential phospholipid-translocating ATPase [Candida albicans SC5314]
orf19.7521	2082	265	20809	13.6712	1026.01	6.22975	Up	6.91002e-13	2.32899e-12	-	-	-	gi|68474610|ref|XP_718678.1|/0/hypothetical protein CaO19.7521 [Candida albicans SC5314]
orf19.4507	816	3	194	0.394888	24.4057	5.94963	Up	6.86954e-05	0.000121283	-	-	-	gi|68486396|ref|XP_712933.1|/5.26367e-140/hypothetical LPF family protein 26 [Candida albicans SC5314]
orf19.3499	504	22	1420	4.68851	289.226	5.94693	Up	5.39168e-10	1.29477e-09	-	-	-	gi|68490684|ref|XP_710838.1|/4.04543e-95/hypothetical LDG family protein 8 [Candida albicans SC5314]
orf19.6518	1986	11	707	0.594917	36.5444	5.94082	Up	6.8798e-07	1.40351e-06	-	GO:0004030//aldehyde dehydrogenase [NAD(P)+] activity	GO:0044237//cellular metabolic process	gi|68469138|ref|XP_721356.1|/0/hypothetical protein CaO19.6518 [Candida albicans SC5314]
orf19.7596	984	13	824	1.41903	85.9631	5.92074	Up	1.93548e-07	4.0707e-07	-	-	-	gi|68473105|ref|XP_719358.1|/0/phosphomutase-like protein [Candida albicans SC5314]
orf19.2941	1737	12	718	0.742035	42.4331	5.83756	Up	3.6595e-07	7.55374e-07	-	GO:0043167//ion binding;GO:0008422//beta-glucosidase activity	GO:0044238//primary metabolic process	gi|68468763|ref|XP_721440.1|/1.95663e-142/potential glycosyl hydrolase [Candida albicans SC5314]
orf19.2157	1242	550	32300	47.5646	2669.69	5.81064	Up	5.61106e-13	1.94258e-12	-	GO:0016811//hydrolase activity, acting on carbon-nitrogen (but not peptide) bonds, in linear amides	-	gi|68487467|ref|XP_712432.1|/0/predicted N-acetylglucosamine-6-phosphate deacetylase [Candida albicans SC5314]
orf19.1430	2547	17	964	0.716907	38.8533	5.76011	Up	1.45204e-08	3.25311e-08	-	-	-	gi|241954646|ref|XP_002420044.1|/0/conserved hypothetical protein [Candida dubliniensis CD36]
orf19.4424	972	14	741	1.54705	78.2586	5.66066	Up	1.0187e-07	2.1785e-07	-	GO:0016791//phosphatase activity	-	gi|68483960|ref|XP_714070.1|/2.15539e-173/hypothetical protein CaO19.11902 [Candida albicans SC5314]
orf19.4607	1305	7	346	0.576143	27.2173	5.56196	Up	7.90574e-06	1.50578e-05	-	-	-	gi|238881654|gb|EEQ45292.1|/0/conserved hypothetical protein [Candida albicans WO-1]
orf19.1122	843	3	140	0.38224	17.0483	5.479	Up	6.86954e-05	0.000121388	-	-	-	gi|68490029|ref|XP_711174.1|/1.35288e-162/conserved fungal hypothetical protein [Candida albicans SC5314]
orf19.1932	2133	26	1200	1.30926	57.7525	5.46306	Up	3.84896e-11	9.69614e-11	GO:0031224//intrinsic to membrane	GO:0016723//oxidoreductase activity, oxidizing metal ions, NAD or NADP as acceptor;GO:0046914//transition metal ion binding;GO:0050662//coenzyme binding	GO:0008152//metabolic process	gi|68480619|ref|XP_715695.1|/0/likely ferric reductase [Candida albicans SC5314]
orf19.2253	1557	48	2189	3.31128	144.324	5.44578	Up	1.05471e-13	4.43197e-13	-	-	-	gi|68482422|ref|XP_714843.1|/0/conserved fungal hypothetical protein [Candida albicans SC5314]
orf19.5169	1722	19	850	1.18512	50.6717	5.41807	Up	3.90788e-09	9.0366e-09	-	GO:0016879//ligase activity, forming carbon-nitrogen bonds;GO:0016811//hydrolase activity, acting on carbon-nitrogen (but not peptide) bonds, in linear amides	-	gi|68477975|ref|XP_716991.1|/0/probable amidase [Candida albicans SC5314]
orf19.6084	639	6	262	1.00854	42.0902	5.38314	Up	1.41012e-05	2.6317e-05	-	-	-	gi|68473886|ref|XP_719046.1|/2.63496e-113/hypothetical protein CaO19.6084 [Candida albicans SC5314]
orf19.7042	903	12	524	1.42737	59.5695	5.38314	Up	3.6595e-07	7.55885e-07	-	-	-	gi|68471117|ref|XP_720335.1|/1.51306e-77/hypothetical protein CaO19.7042 [Candida albicans SC5314]
orf19.5124	4689	483	20471	11.0639	448.166	5.3401	Up	0	0	-	-	-	gi|77022988|ref|XP_888938.1|/0/hypothetical protein CaO19_1346 [Candida albicans SC5314]
orf19.6844	1653	84	3471	5.4582	215.557	5.3035	Up	0	0	GO:0005777//peroxisome	GO:0016833//oxo-acid-lyase activity	GO:0009060//aerobic respiration;GO:0043436;GO:0044262//cellular carbohydrate metabolic process	gi|238879085|gb|EEQ42723.1|/0/isocitrate lyase [Candida albicans WO-1]
orf19.1978	1605	31	1240	2.07458	79.3098	5.25661	Up	1.65068e-12	5.11259e-12	GO:0031224//intrinsic to membrane	-	GO:0006810//transport	gi|68480719|ref|XP_715740.1|/0/potential glycerophosphoinositol permease [Candida albicans SC5314]
orf19.3378	552	1	38	0.194582	7.06683	5.18261	Up	0.00057803	0.000944183	-	-	-	gi|68489154|ref|XP_711598.1|/1.8354e-68/hypothetical protein CaO19.3378 [Candida albicans SC5314]
orf19.2652	660	3	113	0.488225	17.5758	5.1699	Up	6.86954e-05	0.000121213	GO:0043234//protein complex	GO:0008135//translation factor activity, nucleic acid binding	GO:0006412//translation	gi|68488189|ref|XP_712055.1|/1.5e-122/translation elongation factor-like protein fragment [Candida albicans SC5314]
orf19.4459	1692	23	865	1.46006	52.4802	5.16768	Up	2.78222e-10	6.75288e-10	-	GO:0005488//binding	-	gi|68488331|ref|XP_711954.1|/0/hypothetical protein CaO19.4459 [Candida albicans SC5314]
orf19.2154	1482	745	27619	53.9947	1913.11	5.14696	Up	0	0	-	GO:0032559;GO:0016772//transferase activity, transferring phosphorus-containing groups	GO:0006796//phosphate-containing compound metabolic process;GO:0044238//primary metabolic process	gi|68487461|ref|XP_712429.1|/0/N-acetylglucosamine kinase [Candida albicans SC5314]
orf19.2197	1503	3	111	0.21439	7.58131	5.14414	Up	6.86954e-05	0.000121318	-	GO:0000166//nucleotide binding;GO:0050662//coenzyme binding;GO:0016709//oxidoreductase activity, acting on paired donors, with incorporation or reduction of molecular oxygen, NADH or NADPH as one donor, and incorporation of one atom of oxygen	GO:0008152//metabolic process	gi|68479979|ref|XP_716037.1|/0/hypothetical protein CaO19.2197 [Candida albicans SC5314]
orf19.2952	1440	5	181	0.37295	12.9032	5.1126	Up	2.46456e-05	4.51688e-05	-	GO:0043167//ion binding;GO:0008422//beta-glucosidase activity	GO:0044238//primary metabolic process	gi|238879258|gb|EEQ42896.1|/0/hypothetical protein CAWG_01120 [Candida albicans WO-1]
orf19.2247	1527	2	62	0.14068	4.16805	4.88888	Up	0.00011056	0.000191981	-	-	-	gi|68482410|ref|XP_714837.1|/0/conserved fungal hypothetical protein [Candida albicans SC5314]
orf19.7362	2214	58	1786	2.8138	82.8102	4.87922	Up	1.13243e-14	5.26114e-14	-	-	-	gi|2498918|sp|P87024.1|SKN1_CANAL/0/RecName: Full=Beta-glucan synthesis-associated protein SKN1
orf19.6784	1293	72	2180	5.98104	173.076	4.85487	Up	0	0	-	-	-	gi|68472169|ref|XP_719880.1|/1.87955e-112/possible secreted protein [Candida albicans SC5314]
orf19.10	1548	58	1727	4.02439	114.525	4.83075	Up	1.13243e-14	5.26514e-14	GO:0044464//cell part	GO:0004497//monooxygenase activity;GO:0005506//iron ion binding	GO:0008152//metabolic process	gi|68492087|ref|XP_710174.1|/0/potential P450 drug resistance protein [Candida albicans SC5314]
orf19.6805	2832	221	6503	8.38189	235.722	4.81367	Up	1.90292e-13	7.47236e-13	-	-	-	gi|68472209|ref|XP_719900.1|/0/hypothetical protein CaO19.6805 [Candida albicans SC5314]
orf19.6336	2619	250	7259	10.2529	284.526	4.79445	Up	3.71924e-13	1.36083e-12	-	-	-	gi|68491413|ref|XP_710504.1|/4.81454e-114/hypothetical protein CaO19.6336 [Candida albicans SC5314]
orf19.7218	816	572	16471	75.292	2072.1	4.78245	Up	9.32588e-15	4.35255e-14	-	GO:0008233//peptidase activity	-	gi|68482003|ref|XP_715019.1|/1.82596e-108/potential SCP-like extracellular protein [Candida albicans SC5314]
orf19.1066	765	30	862	4.21214	115.671	4.77934	Up	2.99404e-12	8.947e-12	-	-	-	gi|68484807|ref|XP_713715.1|/8.01405e-148/hypothetical protein CaO19.8668 [Candida albicans SC5314]
orf19.3122	1182	28	803	2.54439	69.7394	4.77658	Up	1.04692e-11	2.79269e-11	GO:0031224//intrinsic to membrane	GO:0005343//organic acid:sodium symporter activity	GO:0030001//metal ion transport	gi|68481172|ref|XP_715501.1|/0/potential arsenite transporter [Candida albicans SC5314]
orf19.742	1626	183	5043	12.0885	318.382	4.71905	Up	3.4972e-13	1.29118e-12	-	GO:0016620//oxidoreductase activity, acting on the aldehyde or oxo group of donors, NAD or NADP as acceptor	GO:0008152//metabolic process	gi|238881360|gb|EEQ44998.1|/0/methylmalonate-semialdehyde dehydrogenase, mitochondrial precursor [Candida albicans WO-1]
orf19.7093	1659	18	464	1.16538	28.7112	4.62274	Up	7.54098e-09	1.72293e-08	GO:0031224//intrinsic to membrane	GO:0022857//transmembrane transporter activity	GO:0071702	gi|77022438|ref|XP_888663.1|/0/hypothetical protein CaO19_7093 [Candida albicans SC5314]
orf19.6899	1143	4	102	0.375886	9.16081	4.60711	Up	4.19108e-05	7.54542e-05	-	GO:0004033//aldo-keto reductase (NADP) activity	GO:0008152//metabolic process	gi|68487287|ref|XP_712471.1|/0/hypothetical protein CaO19.6899 [Candida albicans SC5314]
orf19.4933	1302	20	497	1.64992	39.1855	4.56986	Up	2.0216e-09	4.72299e-09	-	GO:0016705//oxidoreductase activity, acting on paired donors, with incorporation or reduction of molecular oxygen	GO:0044238//primary metabolic process	gi|68467193|ref|XP_722258.1|/0/likely delta-12 fatty acid desaturase [Candida albicans SC5314]
orf19.5267	486	878	21255	194.044	4489.57	4.53212	Up	1.18017e-12	3.75614e-12	-	-	-	gi|68479185|ref|XP_716398.1|/2.1757e-47/hypothetical protein CaO19.12732 [Candida albicans SC5314]
orf19.2192	3171	1813	39968	61.4107	1293.89	4.39708	Up	5.4039e-12	1.50248e-11	-	GO:0016639//oxidoreductase activity, acting on the CH-NH2 group of donors, NAD or NADP as acceptor	GO:0006103//2-oxoglutarate metabolic process	gi|68479967|ref|XP_716032.1|/0/hypothetical protein CaO19.2192 [Candida albicans SC5314]
orf19.6488	1710	1	22	0.0628126	1.32071	4.39411	Up	0.000582912	0.00095038	-	-	-	gi|68469084|ref|XP_721329.1|/0/hypothetical protein CaO19.6488 [Candida albicans SC5314]
orf19.5307	1542	19	412	1.32346	27.4279	4.37325	Up	3.90788e-09	9.04002e-09	GO:0031224//intrinsic to membrane	-	GO:0006810//transport	gi|68477595|ref|XP_717110.1|/0/potential lactate/pyruvate transporter [Candida albicans SC5314]
orf19.4121	1155	24	512	2.23189	45.5059	4.34972	Up	1.43658e-10	3.53451e-10	-	GO:0016289//CoA hydrolase activity	GO:0006732//coenzyme metabolic process	gi|68483676|ref|XP_714291.1|/0/potential peroxisomal acyl-CoA thioesterase Tes1p [Candida albicans SC5314]
orf19.5141	2172	16	327	0.79123	15.455	4.28783	Up	2.78868e-08	6.14857e-08	-	-	-	gi|68477921|ref|XP_716964.1|/0/hypothetical LPF family protein 35 [Candida albicans SC5314]
orf19.4509	321	4	80	1.33844	25.5838	4.25661	Up	4.19108e-05	7.5432e-05	-	-	-	gi|68486400|ref|XP_712935.1|/4.16506e-56/hypothetical LPF family protein 28 [Candida albicans SC5314]
orf19.535	336	222	4211	70.967	1286.55	4.18021	Up	5.4623e-14	2.39917e-13	-	-	-	-
orf19.7112	1779	599	11323	36.1654	653.38	4.17524	Up	8.16236e-13	2.69318e-12	GO:0031224//intrinsic to membrane	GO:0016723//oxidoreductase activity, oxidizing metal ions, NAD or NADP as acceptor;GO:0046914//transition metal ion binding;GO:0050662//coenzyme binding	GO:0008152//metabolic process	gi|68471253|ref|XP_720403.1|/0/ferric reductase-like protein [Candida albicans SC5314]
orf19.7597	948	2	37	0.226602	4.00658	4.14414	Up	0.000110563	0.000191823	-	-	-	gi|68473107|ref|XP_719359.1|/0/phosphomutase-like protein [Candida albicans SC5314]
orf19.6741	1248	53	912	4.56146	75.0171	4.03965	Up	4.19664e-14	1.86064e-13	-	-	-	gi|238881127|gb|EEQ44765.1|/0/conserved hypothetical protein [Candida albicans WO-1]
orf19.2734	1008	61	1034	6.49998	105.303	4.01797	Up	3.04202e-14	1.36456e-13	-	GO:0003824//catalytic activity	GO:0008152//metabolic process	gi|68470954|ref|XP_720484.1|/0/hypothetical protein CaO19.2734 [Candida albicans SC5314]
orf19.2809	2679	112	1779	4.49043	68.1684	3.92418	Up	0	0	-	GO:0016747//transferase activity, transferring acyl groups other than amino-acyl groups	-	gi|68490324|ref|XP_711020.1|/0/hypothetical protein CaO19.10327 [Candida albicans SC5314]
orf19.510	1494	74	1167	5.32015	80.1863	3.91382	Up	1.57652e-14	7.23635e-14	-	-	-	gi|68476971|ref|XP_717463.1|/0/hypothetical protein CaO19.8141 [Candida albicans SC5314]
orf19.4342	1071	164	2584	16.4474	247.676	3.91252	Up	1.68088e-13	6.69941e-13	-	-	-	gi|68470803|ref|XP_720647.1|/4.75097e-140/potential fungal zinc cluster transcription factor [Candida albicans SC5314]
orf19.5762	672	11	169	1.75819	25.8165	3.87613	Up	6.8798e-07	1.40304e-06	-	-	-	gi|68475781|ref|XP_718097.1|/1.55507e-90/hypothetical protein CaO19.5762 [Candida albicans SC5314]
orf19.1830	333	135	2050	43.5444	631.96	3.85927	Up	2.49134e-13	9.48447e-13	-	-	-	gi|68490853|ref|XP_710753.1|/8.952e-27/hypothetical protein CaO19.9389 [Candida albicans SC5314]
orf19.1996	1062	67	1011	6.77631	97.7252	3.85016	Up	0	0	-	GO:0016841//ammonia-lyase activity;GO:0048037//cofactor binding	GO:0019752//carboxylic acid metabolic process	gi|68472513|ref|XP_719575.1|/2.08053e-180/hypothetical protein CaO19.9548 [Candida albicans SC5314]
orf19.5564	699	16	240	2.45859	35.2464	3.84157	Up	2.78868e-08	6.15079e-08	-	GO:0016891//endoribonuclease activity, producing 5'-phosphomonoesters;GO:0005488//binding	-	gi|68473603|ref|XP_719126.1|/7.49132e-139/hypothetical protein CaO19.5564 [Candida albicans SC5314]
orf19.1709	384	157	2238	43.9148	598.286	3.76806	Up	2.06502e-14	9.40099e-14	GO:0042579//microbody	GO:0005496//steroid binding;GO:0033764	GO:0008152//metabolic process	gi|68468441|ref|XP_721780.1|/3.8028e-65/potential peroxisomal lipid carrier [Candida albicans SC5314]
orf19.279	411	4	56	1.04535	13.9871	3.74204	Up	4.19108e-05	7.54098e-05	GO:0044424//intracellular part	GO:0016787//hydrolase activity	GO:0009063//cellular amino acid catabolic process	gi|68471605|ref|XP_720109.1|/3.69656e-73/hypothetical protein CaO19.7911 [Candida albicans SC5314]
orf19.5170	2916	2289	31820	84.3143	1120.19	3.73183	Up	0	0	GO:0031224//intrinsic to membrane	GO:0015662//ATPase activity, coupled to transmembrane movement of ions, phosphorylative mechanism;GO:0019829//cation-transporting ATPase activity;GO:0032559	GO:0009206;GO:0006811//ion transport	gi|68477977|ref|XP_716992.1|/0/hypothetical protein CaO19.5170 [Candida albicans SC5314]
orf19.3109	627	7	97	1.19915	15.8812	3.72724	Up	7.90574e-06	1.50485e-05	-	-	-	gi|68481146|ref|XP_715488.1|/1.58234e-107/hypothetical protein CaO19.10621 [Candida albicans SC5314]
orf19.2317	534	6	82	1.20685	15.7635	3.70727	Up	1.41012e-05	2.62849e-05	-	-	-	gi|68484176|ref|XP_713980.1|/4.80023e-55/hypothetical protein CaO19.9853 [Candida albicans SC5314]
orf19.6329	1086	341	4423	33.7262	418.088	3.63186	Up	4.00124e-13	1.44243e-12	-	-	-	gi|68491407|ref|XP_710501.1|/1.38768e-70/hypothetical protein CaO19.6330 [Candida albicans SC5314]
orf19.2036	1080	234	3035	23.2721	288.48	3.6318	Up	5.3424e-13	1.85905e-12	-	GO:0003824//catalytic activity	-	gi|68472583|ref|XP_719610.1|/0/hypothetical protein CaO19.9584 [Candida albicans SC5314]
orf19.2035	957	37	470	4.15272	50.4157	3.60175	Up	1.39222e-13	5.6596e-13	-	-	-	gi|68472581|ref|XP_719609.1|/1.6841e-130/hypothetical protein CaO19.9583 [Candida albicans SC5314]
orf19.4335	1533	3	38	0.210195	2.54461	3.59765	Up	6.8708e-05	0.0001212	-	-	GO:0006810//transport	gi|68470789|ref|XP_720640.1|/0/hypothetical protein CaO19.4335 [Candida albicans SC5314]
orf19.2633.1	195	20	253	11.0164	133.188	3.59575	Up	2.0216e-09	4.72119e-09	-	-	-	-
orf19.2062	699	50	623	7.68308	91.4937	3.57391	Up	3.5083e-14	1.56339e-13	-	GO:0003824//catalytic activity;GO:0016209//antioxidant activity;GO:0043169//cation binding	GO:0072593//reactive oxygen species metabolic process	gi|68472629|ref|XP_719633.1|/2.98023e-95/potential secreted Cu/Zn superoxide dismutase [Candida albicans SC5314]
orf19.638	1140	1092	13369	102.887	1203.85	3.54853	Up	3.68216e-12	1.07665e-11	-	GO:0016614//oxidoreductase activity, acting on CH-OH group of donors;GO:0016620//oxidoreductase activity, acting on the aldehyde or oxo group of donors, NAD or NADP as acceptor;GO:0032559	GO:0008152//metabolic process	gi|68488257|ref|XP_712004.1|/0/potential NAD-formate dehydrogenase [Candida albicans SC5314]
orf19.5933	1428	10	122	0.752168	8.77024	3.54349	Up	1.28466e-06	2.57353e-06	-	-	-	gi|68465567|ref|XP_723145.1|/0/hypothetical protein CaO19.5933 [Candida albicans SC5314]
orf19.2810	1914	100	1188	5.61178	63.7169	3.50514	Up	3.75256e-14	1.66617e-13	GO:0031224//intrinsic to membrane	GO:0005275//amine transmembrane transporter activity	GO:0006865//amino acid transport	gi|68490326|ref|XP_711021.1|/0/potential general amino acid permease [Candida albicans SC5314]
orf19.1313	1221	124	1463	10.9081	123.001	3.4952	Up	1.49214e-13	6.01777e-13	GO:0031224//intrinsic to membrane	GO:0017111//nucleoside-triphosphatase activity;GO:0015405;GO:0032559	GO:0009207;GO:0051234//establishment of localization	gi|68486211|ref|XP_709954.1|/0/opaque-specific ABC transporter CDR3 fragment [Candida albicans SC5314]
orf19.3974	1788	496	5703	29.7959	327.428	3.45799	Up	9.58788e-13	3.11313e-12	GO:0044429//mitochondrial part	GO:0004030//aldehyde dehydrogenase [NAD(P)+] activity;GO:0016646//oxidoreductase activity, acting on the CH-NH group of donors, NAD or NADP as acceptor	GO:0006560//proline metabolic process	gi|68467771|ref|XP_722044.1|/0/hypothetical protein CaO19.11457 [Candida albicans SC5314]
orf19.1539	1200	15	169	1.34262	14.4572	3.42867	Up	5.33946e-08	1.16011e-07	-	-	-	gi|68466775|ref|XP_722583.1|/1.07813e-159/hypothetical protein CaO19.1539 [Candida albicans SC5314]
orf19.3829	1647	977	10980	63.7153	684.367	3.42506	Up	2.29816e-13	8.79834e-13	GO:0031224//intrinsic to membrane	GO:0016787//hydrolase activity;GO:0043167//ion binding	GO:0044238//primary metabolic process	gi|353526316|sp|P43076.3|PHR1_CANAL/0/RecName: Full=pH-responsive protein 1; AltName: Full=pH-regulated protein 1; Flags: Precursor
orf19.4975	2760	59	661	2.29607	24.5851	3.42055	Up	2.19824e-14	9.98517e-14	-	-	-	gi|68467500|ref|XP_722183.1|/0/hyphally regulated cell wall protein [Candida albicans SC5314]
orf19.2886	1269	259	2894	21.922	234.108	3.41672	Up	2.07168e-13	8.02169e-13	-	GO:0004702//receptor signaling protein serine/threonine kinase activity;GO:0032559	GO:0006464//protein modification process	gi|353558908|sp|Q5A1D3.2|ERK1_CANAL/0/RecName: Full=Extracellular signal-regulated kinase 1; Short=ERK1; AltName: Full=MAP kinase 1; Short=MAPK 1
orf19.4917	648	7	77	1.16029	12.1982	3.39411	Up	7.90574e-06	1.50625e-05	-	-	-	gi|68467161|ref|XP_722242.1|/3.32605e-111/hypothetical protein CaO19.12383 [Candida albicans SC5314]
orf19.4673	2352	50	543	2.28337	23.6997	3.37563	Up	3.5083e-14	1.56225e-13	-	-	-	gi|238881707|gb|EEQ45345.1|/0/conserved hypothetical protein [Candida albicans WO-1]
orf19.3668	1638	1653	17895	108.393	1121.5	3.37108	Up	5.9801e-12	1.64844e-11	GO:0031224//intrinsic to membrane	GO:0022857//transmembrane transporter activity	GO:0071702	gi|68484605|ref|XP_713762.1|/0/potential high affinity glucose transporter [Candida albicans SC5314]
orf19.4818	1584	195	2065	13.2228	133.827	3.33928	Up	2.11608e-13	8.17291e-13	-	-	-	gi|238878633|gb|EEQ42271.1|/0/conserved hypothetical protein [Candida albicans WO-1]
orf19.4377	393	45	475	12.2988	124.074	3.33461	Up	1.95399e-14	8.93546e-14	-	-	-	gi|353558674|sp|P0CY22.1|KRE1_CANAL/3.66026e-52/RecName: Full=Protein KRE1; Flags: Precursor
orf19.3483	1218	8	84	0.705481	7.07965	3.327	Up	4.36386e-06	8.45394e-06	-	GO:0008081//phosphoric diester hydrolase activity	GO:0019400	gi|238883123|gb|EEQ46761.1|/0/conserved hypothetical protein [Candida albicans WO-1]
orf19.5592	2022	2	21	0.106241	1.06615	3.327	Up	0.000166868	0.00028498	-	-	-	gi|238883058|gb|EEQ46696.1|/0/conserved hypothetical protein [Candida albicans WO-1]
orf19.6306	1506	141	1441	10.0563	98.2243	3.28799	Up	2.0206e-14	9.21249e-14	-	GO:0004030//aldehyde dehydrogenase [NAD(P)+] activity	GO:0008152//metabolic process	gi|68490118|ref|XP_711108.1|/0/hypothetical protein CaO19.13683 [Candida albicans SC5314]
orf19.2210	2049	318	3220	16.6697	161.322	3.27464	Up	2.2049e-13	8.46781e-13	-	-	-	gi|68480007|ref|XP_716050.1|/0/hypothetical protein CaO19.2210 [Candida albicans SC5314]
orf19.6066	1629	654	6596	43.1221	415.661	3.26891	Up	1.64935e-12	5.11106e-12	-	GO:0004030//aldehyde dehydrogenase [NAD(P)+] activity	GO:0044237//cellular metabolic process	gi|68473850|ref|XP_719028.1|/0/hypothetical protein CaO19.6066 [Candida albicans SC5314]
orf19.1117	1140	12	121	1.13063	10.8958	3.26858	Up	3.6595e-07	7.5614e-07	-	GO:0016614//oxidoreductase activity, acting on CH-OH group of donors;GO:0016620//oxidoreductase activity, acting on the aldehyde or oxo group of donors, NAD or NADP as acceptor;GO:0032559	GO:0008152//metabolic process	gi|68490019|ref|XP_711169.1|/0/potential NAD-formate dehydrogenase [Candida albicans SC5314]
orf19.6420	1371	286	2875	22.4064	215.269	3.26416	Up	3.64154e-14	1.62041e-13	-	-	-	gi|68479453|ref|XP_716258.1|/1.61119e-101/hypothetical protein CaO19.6420 [Candida albicans SC5314]
orf19.4361	2826	14	140	0.532107	5.08553	3.25661	Up	1.0187e-07	2.17926e-07	-	-	-	gi|68477074|ref|XP_717330.1|/0/potential Hyr1-like cell wall protein [Candida albicans SC5314]
orf19.2781	2517	29	290	1.23754	11.8276	3.25661	Up	5.57198e-12	1.54429e-11	-	-	-	gi|68488846|ref|XP_711723.1|/0/likely protein kinase [Candida albicans SC5314]
orf19.4393	1404	2677	26707	204.797	1952.71	3.25321	Up	0	0	GO:0044429//mitochondrial part	GO:0016747//transferase activity, transferring acyl groups other than amino-acyl groups;GO:0046912//transferase activity, transferring acyl groups, acyl groups converted into alkyl on transfer	GO:0009060//aerobic respiration;GO:0005975//carbohydrate metabolic process	gi|238879810|gb|EEQ43448.1|/0/citrate synthase, mitochondrial precursor [Candida albicans WO-1]
orf19.3931	912	97	964	11.424	108.508	3.24766	Up	7.68274e-14	3.29861e-13	GO:0019866//organelle inner membrane;GO:0031224//intrinsic to membrane	-	GO:0006810//transport	gi|68467685|ref|XP_722001.1|/4.96188e-153/potential mitochondrial succinate-fumarate transporter [Candida albicans SC5314]
orf19.6724	1533	821	8115	57.5233	543.409	3.23982	Up	0	0	GO:0043234//protein complex;GO:0044424//intracellular part	GO:0016836//hydro-lyase activity	GO:0009060//aerobic respiration;GO:0043648//dicarboxylic acid metabolic process	gi|238881138|gb|EEQ44776.1|/0/fumarate hydratase, mitochondrial precursor [Candida albicans WO-1]
orf19.6143	2115	174	1711	8.83653	83.0462	3.23236	Up	1.51212e-13	6.09435e-13	-	GO:0016899//oxidoreductase activity, acting on the CH-OH group of donors, oxygen as acceptor;GO:0050662//coenzyme binding	GO:0008152//metabolic process	gi|68487603|ref|XP_712350.1|/0/potential long chain fatty acid alcohol oxidase [Candida albicans SC5314]
orf19.6037	2124	98	941	4.95581	45.4795	3.19802	Up	1.39888e-14	6.44033e-14	-	GO:0004620//phospholipase activity	-	gi|68473792|ref|XP_718999.1|/0/potential acid sphingomyelin phosphodiesterase [Candida albicans SC5314]
orf19.5140	2088	34	325	1.74901	15.9784	3.19151	Up	3.49276e-13	1.29266e-12	-	-	-	gi|68477919|ref|XP_716963.1|/0/hypothetical LPF family protein 34 [Candida albicans SC5314]
orf19.2752	4257	471	4462	11.8839	107.598	3.17857	Up	2.0095e-13	7.83551e-13	GO:0044464//cell part	GO:0046914//transition metal ion binding	-	gi|68470990|ref|XP_720502.1|/0/potential zinc finger protein [Candida albicans SC5314]
orf19.3108	528	214	2013	43.5334	391.372	3.16835	Up	0	0	-	GO:0008172	GO:0006259//DNA metabolic process;GO:0006730//one-carbon metabolic process	gi|74585557|sp|Q5A0Y8.1|MGMT_CANAL/2.52266e-85/RecName: Full=Methylated-DNA--protein-cysteine methyltransferase; AltName: Full=6-O-methylguanine-DNA methyltransferase; Short=MGMT; AltName: Full=DNA repair MTase; AltName: Full=O-6-methylguanine-DNA-alkyltransferase
orf19.7495	1299	39	365	3.22477	28.8446	3.16103	Up	1.03695e-13	4.36632e-13	-	GO:0016651//oxidoreductase activity, acting on NADH or NADPH;GO:0000166//nucleotide binding	GO:0008152//metabolic process	gi|68474558|ref|XP_718652.1|/0/potential NADH-dependent flavin oxidoreductase [Candida albicans SC5314]
orf19.5565	1065	213	1989	21.4819	191.719	3.1578	Up	3.82582e-13	1.39648e-12	-	GO:0016616//oxidoreductase activity, acting on the CH-OH group of donors, NAD or NADP as acceptor;GO:0048037//cofactor binding	GO:0009081//branched chain family amino acid metabolic process;GO:0006007//glucose catabolic process	gi|68473605|ref|XP_719127.1|/0/hypothetical protein CaO19.5565 [Candida albicans SC5314]
orf19.6678	1122	7	65	0.670113	5.94704	3.14969	Up	7.90574e-06	1.50532e-05	-	-	-	gi|238882751|gb|EEQ46389.1|/0/conserved hypothetical protein [Candida albicans WO-1]
orf19.4666	411	56	518	14.6349	129.38	3.14414	Up	1.35447e-14	6.25944e-14	-	-	-	gi|68466215|ref|XP_722882.1|/1.20023e-39/hypothetical protein CaO19.12136 [Candida albicans SC5314]
orf19.4381	2355	1452	13290	66.2245	579.314	3.12891	Up	3.36686e-12	9.91569e-12	-	-	-	gi|68481831|ref|XP_715157.1|/0/potential vacuolar polyphosphate synthetase [Candida albicans SC5314]
orf19.7114	3057	6977	63611	245.141	2136.08	3.12328	Up	2.81764e-11	7.16004e-11	-	-	-	gi|68471255|ref|XP_720404.1|/4.33694e-146/putative cell wall protein Wap1 [Candida albicans SC5314]
orf19.6169	798	3	27	0.403795	3.47329	3.10461	Up	7.68584e-05	0.000135149	GO:0044464//cell part	-	-	gi|238880529|gb|EEQ44167.1|/4.41401e-144/conserved hypothetical protein [Candida albicans WO-1]
orf19.4584	1371	65	583	5.09236	43.6527	3.09967	Up	0	0	-	GO:0016791//phosphatase activity	GO:0006796//phosphate-containing compound metabolic process	gi|68466053|ref|XP_722801.1|/0/hypothetical protein CaO19.12053 [Candida albicans SC5314]
orf19.532	507	249	2222	52.7514	449.9	3.09232	Up	1.10134e-13	4.6089e-13	-	-	-	gi|68477019|ref|XP_717487.1|/4.49988e-25/hypothetical protein CaO19.8165 [Candida albicans SC5314]
orf19.5266	1380	5	44	0.389165	3.27306	3.07219	Up	2.4656e-05	4.51473e-05	-	-	-	gi|68479183|ref|XP_716397.1|/0/hypothetical protein CaO19.12731 [Candida albicans SC5314]
orf19.2452	1248	157	1322	13.5123	108.742	3.00857	Up	2.06502e-14	9.408e-14	-	-	-	gi|68474866|ref|XP_718474.1|/0/hypothetical protein CaO19.2452 [Candida albicans SC5314]
orf19.3234	1179	41	345	3.73519	30.039	3.00758	Up	1.35003e-13	5.50273e-13	-	GO:0016651//oxidoreductase activity, acting on NADH or NADPH;GO:0000166//nucleotide binding	GO:0008152//metabolic process	gi|68475969|ref|XP_717925.1|/0/potential NADH-dependent flavin oxidoreductase [Candida albicans SC5314]
orf19.1409.2	285	147	1231	55.4007	443.398	3.00062	Up	1.24567e-13	5.10458e-13	-	-	-	-
orf19.3672	2028	290	2353	15.3594	119.106	2.95506	Up	2.90878e-13	1.09644e-12	-	GO:0048037//cofactor binding;GO:0016857//racemase and epimerase activity, acting on carbohydrates and derivatives	GO:0019318//hexose metabolic process	gi|68484613|ref|XP_713766.1|/0/hypothetical protein CaO19.3672 [Candida albicans SC5314]
orf19.183	669	14	113	2.24773	17.3393	2.94751	Up	1.0187e-07	2.17774e-07	GO:0044424//intracellular part	GO:0016836//hydro-lyase activity	GO:0006547//histidine metabolic process	gi|238882261|gb|EEQ45899.1|/1.5256e-122/imidazoleglycerol-phosphate dehydratase [Candida albicans WO-1]
orf19.2475	396	22	176	5.9672	45.6244	2.93468	Up	5.39168e-10	1.29578e-09	-	-	-	gi|238878975|gb|EEQ42613.1|/3.02049e-14/conserved hypothetical protein [Candida albicans WO-1]
orf19.6993	1767	112	891	6.80807	51.7632	2.92661	Up	0	0	GO:0031224//intrinsic to membrane	GO:0005275//amine transmembrane transporter activity	GO:0006865//amino acid transport	gi|68482779|ref|XP_714699.1|/0/potential general amino acid permease [Candida albicans SC5314]
orf19.3733	1239	108	853	9.36257	70.6737	2.9162	Up	0	0	GO:0042579//microbody	GO:0046872//metal ion binding;GO:0004448//isocitrate dehydrogenase activity;GO:0000166//nucleotide binding	GO:0009060//aerobic respiration;GO:0044262//cellular carbohydrate metabolic process;GO:0019752//carboxylic acid metabolic process	gi|68485320|ref|XP_713421.1|/0/hypothetical protein CaO19.3733 [Candida albicans SC5314]
orf19.2681	978	17	134	1.86704	14.0652	2.91331	Up	1.45204e-08	3.2555e-08	-	GO:0003676//nucleic acid binding;GO:0016892	-	gi|68470854|ref|XP_720434.1|/0/probable T2 family ribonuclease [Candida albicans SC5314]
orf19.3784	882	116	901	14.1264	104.866	2.89208	Up	1.18794e-13	4.91744e-13	-	-	-	gi|68477436|ref|XP_717189.1|/5.20069e-168/hypothetical protein CaO19.3784 [Candida albicans SC5314]
orf19.4833	1656	2308	17906	149.699	1109.99	2.89041	Up	0	0	GO:0005777//peroxisome	GO:0046912//transferase activity, transferring acyl groups, acyl groups converted into alkyl on transfer	GO:0009060//aerobic respiration;GO:0044262//cellular carbohydrate metabolic process	gi|6980009|gb|AAF34695.1|AF222907_1/0/malate synthase [Candida albicans]
orf19.6017	1626	74	570	4.88826	35.9861	2.88005	Up	1.57652e-14	7.24179e-14	-	-	-	gi|68473752|ref|XP_718979.1|/0/hypothetical protein CaO19.6017 [Candida albicans SC5314]
orf19.7156	2241	136	1040	6.51838	47.64	2.86959	Up	2.29816e-13	8.78184e-13	-	GO:0015645//fatty acid ligase activity	-	gi|68481674|ref|XP_715205.1|/0/potential long chain fatty acyl-CoA synthetase [Candida albicans SC5314]
orf19.1655	2175	1279	9730	63.1617	459.234	2.86211	Up	5.17386e-12	1.44443e-11	GO:0042579//microbody	GO:0050662//coenzyme binding;GO:0016634	GO:0009062//fatty acid catabolic process	gi|68468345|ref|XP_721732.1|/0/potential fatty-acyl coenzyme A oxidase [Candida albicans SC5314]
orf19.4251	2100	32	243	1.63672	11.8786	2.85949	Up	9.54126e-13	3.09964e-12	GO:0043231//intracellular membrane-bounded organelle	GO:0046914//transition metal ion binding;GO:0001071//nucleic acid binding transcription factor activity	GO:0006351//transcription, DNA-dependent	gi|238882641|gb|EEQ46279.1|/0/conserved hypothetical protein [Candida albicans WO-1]
orf19.5393	1485	206	1549	14.8999	107.079	2.8453	Up	2.95986e-13	1.11364e-12	-	GO:0016831//carboxy-lyase activity;GO:0048037//cofactor binding	GO:0043436	gi|68476237|ref|XP_717768.1|/0/hypothetical protein CaO19.5393 [Candida albicans SC5314]
orf19.4445	1629	679	5088	44.7705	320.631	2.8403	Up	1.52767e-13	6.14888e-13	-	-	-	gi|68484002|ref|XP_714091.1|/0/hypothetical protein CaO19.11925 [Candida albicans SC5314]
orf19.720	648	47	350	7.79051	55.4464	2.8313	Up	0	0	-	GO:0016765//transferase activity, transferring alkyl or aryl (other than methyl) groups	-	gi|68486016|ref|XP_713080.1|/4.04701e-125/potential glutathione S-transferase [Candida albicans SC5314]
orf19.4567	912	10	74	1.17774	8.32946	2.82221	Up	1.28466e-06	2.57269e-06	-	GO:0019114;GO:0005506//iron ion binding	GO:0018958//phenol-containing compound metabolic process	gi|209572875|sp|P86029.1|HQD2_CANAL/2.07503e-167/RecName: Full=Catechol 1,2-dioxygenase
orf19.3936	3489	571	4223	17.5783	124.251	2.82139	Up	1.89626e-13	7.45578e-13	-	GO:0004620//phospholipase activity;GO:0008081//phosphoric diester hydrolase activity	GO:0007165//signal transduction;GO:0019400	gi|68467693|ref|XP_722005.1|/0/hypothetical protein CaO19.11418 [Candida albicans SC5314]
orf19.376	1248	134	986	11.5328	81.104	2.81404	Up	0	0	-	-	-	gi|68491753|ref|XP_710344.1|/0/potential 1,4-Butanediol Diacrylate Esterase [Candida albicans SC5314]
orf19.5305	615	4641	34094	810.549	5690.93	2.81169	Up	1.49638e-11	3.92655e-11	-	-	-	gi|68477591|ref|XP_717108.1|/6.71206e-79/hypothetical LDG family protein 7 [Candida albicans SC5314]
orf19.3100	3117	1005	7312	34.6316	240.813	2.79775	Up	1.39355e-12	4.36708e-12	-	-	-	gi|68481269|ref|XP_715409.1|/0/hypothetical protein CaO19.3100 [Candida albicans SC5314]
orf19.300	1584	243	1739	16.4776	112.7	2.77391	Up	1.05471e-13	4.43501e-13	-	GO:0004457//lactate dehydrogenase activity;GO:0050662//coenzyme binding	GO:0008152//metabolic process	gi|68471643|ref|XP_720128.1|/0/hypothetical protein CaO19.7932 [Candida albicans SC5314]
orf19.36.1	207	44	314	22.831	155.718	2.76987	Up	7.72716e-14	3.30608e-13	-	-	-	gi|354543706|emb|CCE40428.1|/1.38203e-11/hypothetical protein CPAR2_104640 [Candida parapsilosis]
orf19.4405	3057	160	1135	5.6217	38.1136	2.76123	Up	1.108e-13	4.63043e-13	-	GO:0004721//phosphoprotein phosphatase activity	GO:0006796//phosphate-containing compound metabolic process	gi|68488555|ref|XP_711853.1|/0/hypothetical protein CaO19.4405 [Candida albicans SC5314]
orf19.385	3000	1018	7122	36.4476	243.703	2.74123	Up	2.3841e-12	7.25554e-12	-	GO:0016642;GO:0048037//cofactor binding	GO:0009069//serine family amino acid metabolic process	gi|68488496|ref|XP_711873.1|/0/hypothetical protein CaO19.385 [Candida albicans SC5314]
orf19.4916	1470	221	1529	16.148	106.775	2.72515	Up	1.90292e-13	7.46277e-13	-	-	-	gi|68467159|ref|XP_722241.1|/0/hypothetical YFW family protein 2 [Candida albicans SC5314]
orf19.2706	1362	570	3891	44.9511	293.268	2.70579	Up	1.18372e-12	3.76353e-12	GO:0030312//external encapsulating structure	GO:0004553//hydrolase activity, hydrolyzing O-glycosyl compounds	GO:0044238//primary metabolic process;GO:0045229//external encapsulating structure organization	gi|68470900|ref|XP_720457.1|/4.87137e-167/potential cell wall glycosidase [Candida albicans SC5314]
orf19.4274	1470	753	5139	55.02	358.873	2.70545	Up	1.37979e-12	4.3306e-12	-	GO:0016645//oxidoreductase activity, acting on the CH-NH group of donors	GO:0006560//proline metabolic process;GO:0006536//glutamate metabolic process	gi|68470673|ref|XP_720582.1|/0/hypothetical protein CaO19.4274 [Candida albicans SC5314]
orf19.5289	315	4	27	1.36393	8.799	2.68957	Up	7.50938e-05	0.000132122	-	-	-	gi|68491687|ref|XP_710370.1|/2.73328e-31/hypothetical protein CaO19.5289 [Candida albicans SC5314]
orf19.6254	1038	40	268	4.1391	26.5044	2.67884	Up	9.30366e-14	3.9447e-13	GO:0031224//intrinsic to membrane	-	GO:0051234//establishment of localization	gi|68474266|ref|XP_718842.1|/1.34636e-176/potential peroxisomal adenine nucleotide transporter protein [Candida albicans SC5314]
orf19.4668	2154	173	1154	8.62667	54.9972	2.67248	Up	3.89688e-13	1.41903e-12	-	GO:0004553//hydrolase activity, hydrolyzing O-glycosyl compounds	GO:0044238//primary metabolic process	gi|68466219|ref|XP_722884.1|/0/potential glycosyl hydrolase [Candida albicans SC5314]
orf19.5826	1635	21	140	1.37957	8.79003	2.67165	Up	1.04444e-09	2.48084e-09	GO:0031224//intrinsic to membrane	GO:0005275//amine transmembrane transporter activity	GO:0006865//amino acid transport	gi|68481456|ref|XP_715367.1|/0/potential GABA-specific transport protein [Candida albicans SC5314]
orf19.1005	1809	239	1584	14.1906	89.887	2.66317	Up	7.17204e-13	2.40142e-12	-	-	-	gi|68492435|ref|XP_710024.1|/0/hypothetical LPF family protein 10 [Candida albicans SC5314]
orf19.5842	786	5	33	0.683267	4.30994	2.65715	Up	2.93172e-05	5.3331e-05	-	GO:0008169//C-methyltransferase activity	GO:0006783//heme biosynthetic process;GO:0006730//one-carbon metabolic process	gi|238882089|gb|EEQ45727.1|/1.21169e-130/conserved hypothetical protein [Candida albicans WO-1]
orf19.1766	1206	4	26	0.356251	2.21313	2.63512	Up	9.90064e-05	0.000172901	-	GO:0016787//hydrolase activity	-	gi|68483339|ref|XP_714411.1|/0/possible alpha-1,6-mannanase [Candida albicans SC5314]
orf19.999	2841	177	1149	6.69183	41.5173	2.63324	Up	0	0	-	GO:0005488//binding;GO:0015926//glucosidase activity	GO:0005976//polysaccharide metabolic process	gi|3420947|gb|AAC31968.1|/0/glucoamylase [Candida albicans]
orf19.3684	879	151	975	18.4515	113.866	2.62554	Up	1.66533e-14	7.6383e-14	-	GO:0016628//oxidoreductase activity, acting on the CH-CH group of donors, NAD or NADP as acceptor	GO:0008152//metabolic process	gi|238879293|gb|EEQ42931.1|/3.71362e-158/sporulation protein SPS19 [Candida albicans WO-1]
orf19.716	501	349	2243	74.8222	459.591	2.61881	Up	1.86517e-13	7.36671e-13	-	-	-	gi|68485961|ref|XP_713099.1|/2.57673e-86/septicolysin-like protein [Candida albicans SC5314]
orf19.3434	2970	173	1107	6.25651	38.2623	2.61249	Up	3.89688e-13	1.4165e-12	GO:0044464//cell part	GO:0046914//transition metal ion binding	-	gi|68478479|ref|XP_716741.1|/0/potential zinc finger protein [Candida albicans SC5314]
orf19.7077	1761	1186	7584	72.3383	442.099	2.61154	Up	3.55804e-12	1.04335e-11	GO:0031224//intrinsic to membrane	GO:0016723//oxidoreductase activity, oxidizing metal ions, NAD or NADP as acceptor;GO:0046914//transition metal ion binding;GO:0050662//coenzyme binding	GO:0008152//metabolic process	gi|68471183|ref|XP_720368.1|/0/likely ferric reductase [Candida albicans SC5314]
orf19.4674.1	231	8	51	3.71981	22.6641	2.60711	Up	4.37784e-06	8.47834e-06	GO:0031224//intrinsic to membrane	GO:0017111//nucleoside-triphosphatase activity;GO:0015405;GO:0032559	GO:0009207;GO:0051234//establishment of localization	gi|8745543|gb|AAF78959.1|AF268099_1/3.80887e-33/Cu-binding metallothionein [Candida albicans]
orf19.1288	2721	944	6014	37.2637	226.89	2.60615	Up	1.88738e-13	7.43042e-13	GO:0042579//microbody	GO:0016614//oxidoreductase activity, acting on CH-OH group of donors	GO:0032787//monocarboxylic acid metabolic process;GO:0044238//primary metabolic process	gi|68492311|ref|XP_710072.1|/0/probable peroxisomal hydratase-dehydrogenase-epimerase [Candida albicans SC5314]
orf19.6807	1830	1456	9265	85.4581	519.726	2.60446	Up	5.66124e-12	1.5669e-11	-	GO:0003676//nucleic acid binding	GO:0006259//DNA metabolic process	gi|68472213|ref|XP_719902.1|/0/hypothetical protein CaO19.6807 [Candida albicans SC5314]
orf19.3127	1158	436	2761	40.4409	244.759	2.59747	Up	5.93304e-13	2.03904e-12	-	-	-	gi|68481182|ref|XP_715506.1|/6.97082e-124/potential fungal zinc cluster transcription factor [Candida albicans SC5314]
orf19.2837	972	77	487	8.50878	51.4331	2.59567	Up	0	0	-	GO:0035251//UDP-glucosyltransferase activity	-	gi|68480439|ref|XP_715818.1|/6.70022e-175/hypothetical protein CaO19.10355 [Candida albicans SC5314]
orf19.2619	1389	80	504	6.18629	37.2485	2.59003	Up	0	0	-	GO:0016791//phosphatase activity	GO:0006796//phosphate-containing compound metabolic process	gi|68485289|ref|XP_713478.1|/0/hypothetical protein CaO19.11238 [Candida albicans SC5314]
orf19.3934	954	379	2387	42.6711	256.853	2.58961	Up	8.12684e-14	3.46254e-13	-	GO:0043169//cation binding;GO:0016813//hydrolase activity, acting on carbon-nitrogen (but not peptide) bonds, in linear amidines	GO:0009064//glutamine family amino acid metabolic process	gi|68468008|ref|XP_721843.1|/0/arginase family protein [Candida albicans SC5314]
orf19.5585	1257	7	44	0.598144	3.59333	2.58676	Up	8.06968e-06	1.53319e-05	-	GO:0004175//endopeptidase activity	GO:0019538//protein metabolic process	gi|68473414|ref|XP_719265.1|/0/secretory aspartyl proteinase SAP5p [Candida albicans SC5314]
orf19.6200	954	7	44	0.78812	4.73461	2.58676	Up	8.06968e-06	1.53367e-05	-	-	-	gi|68474164|ref|XP_718791.1|/6.33697e-146/hypothetical protein CaO19.6200 [Candida albicans SC5314]
orf19.6781	1419	54	339	4.08747	24.5243	2.58494	Up	3.37508e-14	1.50622e-13	-	-	-	gi|68472163|ref|XP_719877.1|/5.312e-180/potential zinc finger upstream protein 2 fragment [Candida albicans SC5314]
orf19.5383	2688	1460	9156	58.34	349.669	2.58343	Up	4.30944e-12	1.23179e-11	GO:0031224//intrinsic to membrane	GO:0043169//cation binding;GO:0015662//ATPase activity, coupled to transmembrane movement of ions, phosphorylative mechanism;GO:0032559	GO:0006818//hydrogen transport;GO:0009206;GO:0006811//ion transport;GO:0009207	gi|68476219|ref|XP_717759.1|/0/hypothetical protein CaO19.5383 [Candida albicans SC5314]
orf19.2638	828	14	87	1.8161	10.7862	2.57027	Up	1.0187e-07	2.17698e-07	-	-	-	gi|68488163|ref|XP_712042.1|/3.06256e-143/hypothetical protein CaO19.10161 [Candida albicans SC5314]
orf19.3655	1917	10	62	0.5603	3.32009	2.56695	Up	1.28517e-06	2.57287e-06	-	-	-	gi|68489704|ref|XP_711327.1|/0/hypothetical protein CaO19.3655 [Candida albicans SC5314]
orf19.7157	768	12	74	1.67827	9.89124	2.55917	Up	3.65962e-07	7.55144e-07	-	-	-	gi|241957743|ref|XP_002421591.1|/5.29495e-107/conserved hypothetical protein [Candida dubliniensis CD36]
orf19.6570	1221	28	172	2.46312	14.4608	2.55359	Up	1.04692e-11	2.79148e-11	-	-	GO:0006810//transport	gi|68469238|ref|XP_721406.1|/0/purine nucleoside permease [Candida albicans SC5314]
orf19.715	483	233	1414	51.8145	300.526	2.53606	Up	0	0	-	-	-	gi|68486006|ref|XP_713075.1|/5.75601e-69/hypothetical protein CaO19.715 [Candida albicans SC5314]
orf19.1321	1905	6	36	0.338298	1.93994	2.51964	Up	1.7392e-05	3.22617e-05	-	-	-	gi|68486221|ref|XP_709959.1|/1.1358e-98/hypothetical protein CaO19.1319 [Candida albicans SC5314]
orf19.4921	2172	163	966	8.06066	45.656	2.50183	Up	2.55574e-13	9.71149e-13	-	-	-	gi|68467169|ref|XP_722246.1|/0/hypothetical YFW family protein 1 [Candida albicans SC5314]
orf19.5215	1062	68	402	6.87745	38.8581	2.49827	Up	0	0	-	GO:0016289//CoA hydrolase activity	GO:0006732//coenzyme metabolic process	gi|68490533|ref|XP_710923.1|/2.3003e-179/potential acyl-CoA thioesterase Tes5p [Candida albicans SC5314]
orf19.2199	1008	125	727	13.3196	74.0379	2.47471	Up	2.39808e-14	1.08526e-13	-	-	-	gi|68479983|ref|XP_716039.1|/0/hypothetical protein CaO19.2199 [Candida albicans SC5314]
orf19.5635	660	2273	13185	369.912	2050.77	2.47091	Up	0	0	-	-	-	gi|68485371|ref|XP_713363.1|/5.0283e-94/potential cell surface antigen [Candida albicans SC5314]
orf19.5145	1248	95	550	8.17621	45.2406	2.46811	Up	1.39888e-14	6.43549e-14	-	GO:0000166//nucleotide binding;GO:0050662//coenzyme binding;GO:0016709//oxidoreductase activity, acting on paired donors, with incorporation or reduction of molecular oxygen, NADH or NADPH as one donor, and incorporation of one atom of oxygen	GO:0008152//metabolic process	gi|68477929|ref|XP_716968.1|/0/hypothetical protein CaO19.5145 [Candida albicans SC5314]
orf19.4520	576	38	220	7.08605	39.2085	2.46811	Up	1.21902e-13	5.01893e-13	-	GO:0016301//kinase activity;GO:0032559	GO:0044238//primary metabolic process;GO:0006796//phosphate-containing compound metabolic process	gi|68486420|ref|XP_712945.1|/3.15076e-101/hypothetical protein CaO19.4520 [Candida albicans SC5314]
orf19.570	2145	14	81	0.701041	3.87648	2.46718	Up	1.01873e-07	2.17628e-07	-	-	-	gi|68483685|ref|XP_714201.1|/4.59462e-152/hypothetical protein CaO19.570 [Candida albicans SC5314]
orf19.413	2076	255	1473	13.1934	72.8376	2.46487	Up	0	0	-	-	-	gi|68480287|ref|XP_715848.1|/0/hypothetical protein CaO19.413 [Candida albicans SC5314]
orf19.4716	1371	510	2942	39.9554	220.285	2.46291	Up	0	0	-	GO:0016639//oxidoreductase activity, acting on the CH-NH2 group of donors, NAD or NADP as acceptor	GO:0019752//carboxylic acid metabolic process	gi|68491798|ref|XP_710311.1|/0/hypothetical protein CaO19.4716 [Candida albicans SC5314]
orf19.4590	3336	127	726	4.08903	22.3404	2.44982	Up	1.12355e-13	4.67622e-13	-	-	-	gi|68466065|ref|XP_722807.1|/0/hypothetical protein CaO19.12059 [Candida albicans SC5314]
orf19.3418	1086	35	200	3.46163	18.9052	2.44926	Up	2.33146e-13	8.89797e-13	-	GO:0016813//hydrolase activity, acting on carbon-nitrogen (but not peptide) bonds, in linear amidines;GO:0043169//cation binding	GO:0006595//polyamine metabolic process	gi|68478451|ref|XP_716727.1|/0/arginase family protein [Candida albicans SC5314]
orf19.6008	2826	471	2687	17.9016	97.6058	2.44688	Up	2.0095e-13	7.83052e-13	-	-	-	gi|68465709|ref|XP_723216.1|/0/hypothetical protein CaO19.6008 [Candida albicans SC5314]
orf19.5575	1620	358	2038	23.7362	129.143	2.4438	Up	4.87388e-13	1.71554e-12	-	-	-	gi|68473392|ref|XP_719254.1|/0/potential peroxisome regulatory protein Pex25 [Candida albicans SC5314]
orf19.1611	933	43	243	4.95028	26.7365	2.43323	Up	1.15463e-13	4.7958e-13	-	-	-	gi|68468261|ref|XP_721690.1|/3.07994e-89/hypothetical protein CaO19.1611 [Candida albicans SC5314]
orf19.3998	486	21	118	4.64115	24.9245	2.42501	Up	1.04444e-09	2.47988e-09	-	-	-	gi|68468134|ref|XP_721906.1|/1.11482e-51/hypothetical protein CaO19.3998 [Candida albicans SC5314]
orf19.3646	756	14045	78391	1995.46	10644.5	2.41531	Up	0	0	-	-	GO:0006825//copper ion transport	gi|68489594|ref|XP_711367.1|/3.01083e-107/hypothetical protein CaO19.11130 [Candida albicans SC5314]
orf19.5255	2004	268	1490	14.3641	76.3253	2.40969	Up	1.55653e-13	6.25272e-13	GO:0031224//intrinsic to membrane	GO:0017111//nucleoside-triphosphatase activity;GO:0015405;GO:0032559	GO:0006810//transport;GO:0009207	gi|68479161|ref|XP_716386.1|/0/potential peroxisomal fatty acid ABC transporter subunit [Candida albicans SC5314]
orf19.3444	2031	28	155	1.48078	7.83433	2.40345	Up	1.04692e-11	2.79026e-11	GO:0044464//cell part	-	GO:0006810//transport	gi|68478499|ref|XP_716751.1|/0/potential MFS-MDR transporter [Candida albicans SC5314]
orf19.3664	996	18	99	1.94114	10.2037	2.39411	Up	7.54102e-09	1.72229e-08	-	-	GO:0050896//response to stimulus	gi|68484597|ref|XP_713758.1|/0/hypothetical protein CaO19.3664 [Candida albicans SC5314]
orf19.5455	348	807	4428	249.079	1306.2	2.3907	Up	8.00248e-13	2.64757e-12	-	-	-	gi|238880454|gb|EEQ44092.1|/6.27748e-60/vacuolar transporter chaperone 1 [Candida albicans WO-1]
orf19.6782	2055	182	990	9.51267	49.4542	2.37817	Up	0	0	-	-	-	gi|238881101|gb|EEQ44739.1|/0/conserved hypothetical protein [Candida albicans WO-1]
orf19.6731	333	92	497	29.6747	153.212	2.36822	Up	2.77556e-14	1.25238e-13	-	-	-	gi|68472069|ref|XP_719830.1|/2.85317e-57/hypothetical protein CaO19.6731 [Candida albicans SC5314]
orf19.3522	306	5	27	1.75506	9.05779	2.36764	Up	0.000136081	0.000233839	-	GO:0003676//nucleic acid binding	-	gi|68482120|ref|XP_714944.1|/2.83157e-52/possible reverse transcriptase fragment [Candida albicans SC5314]
orf19.298	504	11	59	2.34426	12.0172	2.35789	Up	6.95896e-07	1.41824e-06	-	GO:0046914//transition metal ion binding;GO:0008235//metalloexopeptidase activity	GO:0019538//protein metabolic process	gi|68471639|ref|XP_720126.1|/2.71353e-91/hypothetical protein CaO19.7930 [Candida albicans SC5314]
orf19.2509.1	210	7	37	3.58032	18.0868	2.33678	Up	1.41889e-05	2.64323e-05	-	-	-	-
orf19.3639	1065	141	742	14.2204	71.5211	2.33041	Up	2.0206e-14	9.22625e-14	-	GO:0003676//nucleic acid binding;GO:0019104//DNA N-glycosylase activity	GO:0006281//DNA repair	gi|68483189|ref|XP_714528.1|/4.23017e-165/hypothetical protein CaO19.11121 [Candida albicans SC5314]
orf19.660	1947	218	1136	12.0263	59.8953	2.31624	Up	1.22347e-13	5.03044e-13	-	-	-	gi|68484445|ref|XP_713833.1|/0/hypothetical protein CaO19.8276 [Candida albicans SC5314]
orf19.3435	444	122	635	29.5134	146.815	2.31456	Up	7.0166e-14	3.03177e-13	-	-	-	gi|68478481|ref|XP_716742.1|/4.14293e-27/hypothetical protein CaO19.3435 [Candida albicans SC5314]
orf19.6456	1677	439	2278	28.1173	139.444	2.31016	Up	0	0	-	-	-	gi|68469024|ref|XP_721299.1|/0/hypothetical protein CaO19.6456 [Candida albicans SC5314]
orf19.1350	999	269	1392	28.9221	143.039	2.30616	Up	6.57252e-14	2.85198e-13	-	-	-	gi|68491967|ref|XP_710234.1|/1.08713e-127/hypothetical protein CaO19.1350 [Candida albicans SC5314]
orf19.1715	1791	569	2933	34.124	168.111	2.30056	Up	0	0	-	-	-	gi|68468453|ref|XP_721786.1|/0/putative transcription factor [Candida albicans SC5314]
orf19.3263	453	22	113	5.21636	25.6071	2.29543	Up	5.39172e-10	1.29427e-09	GO:0044464//cell part	-	-	gi|68476025|ref|XP_717953.1|/1.17005e-75/possible transmembrane sensor/transporter [Candida albicans SC5314]
orf19.1589.1	1362	40	205	3.15446	15.451	2.29223	Up	9.30366e-14	3.94197e-13	-	GO:0016769//transferase activity, transferring nitrogenous groups;GO:0048037//cofactor binding;GO:0016846//carbon-sulfur lyase activity	GO:0008652//cellular amino acid biosynthetic process	gi|68481422|ref|XP_715350.1|/0/hypothetical protein CaO19.5809 [Candida albicans SC5314]
orf19.1587	1512	26	133	1.84699	9.02984	2.28952	Up	3.84896e-11	9.70014e-11	GO:0031224//intrinsic to membrane	GO:0022857//transmembrane transporter activity	GO:0071702	gi|68466867|ref|XP_722629.1|/0/hypothetical protein CaO19.1587 [Candida albicans SC5314]
orf19.3901	1518	93	474	6.58043	32.0543	2.28427	Up	5.4623e-14	2.40263e-13	-	GO:0016491//oxidoreductase activity	-	gi|68467625|ref|XP_721971.1|/0/potential monooxygenase [Candida albicans SC5314]
orf19.6501	873	21	107	2.58373	12.582	2.28383	Up	1.04446e-09	2.47896e-09	-	GO:0004091//carboxylesterase activity	-	gi|68469104|ref|XP_721339.1|/5.64797e-167/hypothetical protein CaO19.6501 [Candida albicans SC5314]
orf19.2551	2304	7911	40217	368.801	1791.87	2.28056	Up	0	0	-	GO:0046914//transition metal ion binding;GO:0008172	GO:0006730//one-carbon metabolic process;GO:0000097//sulfur amino acid biosynthetic process	gi|68475194|ref|XP_718315.1|/0/likely cobalamin-independent methionine synthase [Candida albicans SC5314]
orf19.4568	2418	65	327	2.88735	13.8826	2.26546	Up	0	0	GO:0043231//intracellular membrane-bounded organelle	GO:0046914//transition metal ion binding;GO:0003676//nucleic acid binding;GO:0001071//nucleic acid binding transcription factor activity	GO:0006351//transcription, DNA-dependent	gi|68466316|ref|XP_722640.1|/0/hypothetical protein CaO19.4568 [Candida albicans SC5314]
orf19.4066	2412	133	669	5.92266	28.4727	2.26526	Up	1.49214e-13	6.02175e-13	-	GO:0016747//transferase activity, transferring acyl groups other than amino-acyl groups	-	gi|68483574|ref|XP_714240.1|/0/potential acyltransferase [Candida albicans SC5314]
orf19.7512	1617	244	1211	16.2077	76.8801	2.24593	Up	3.9213e-13	1.42284e-12	GO:0031090//organelle membrane;GO:0043231//intracellular membrane-bounded organelle;GO:0031224//intrinsic to membrane	GO:0004497//monooxygenase activity;GO:0005506//iron ion binding	GO:0008152//metabolic process	gi|68474592|ref|XP_718669.1|/0/hypothetical protein CaO19.7512 [Candida albicans SC5314]
orf19.3940.1	102	415	2050	437.009	2063.16	2.23912	Up	0	0	-	-	-	gi|6164951|gb|AAF04594.1|AF193509_1/2.52235e-13/copper resistance-associated metallothionein [Candida albicans]
orf19.4551	2388	60	296	2.69873	12.7244	2.23724	Up	0	0	-	GO:0016406	-	gi|68486355|ref|XP_712976.1|/0/hypothetical protein CaO19.4551 [Candida albicans SC5314]
orf19.4394	1710	27	132	1.69594	7.92425	2.22419	Up	2.00102e-11	5.16213e-11	-	-	-	gi|68481857|ref|XP_715170.1|/0/hypothetical protein CaO19.4394 [Candida albicans SC5314]
orf19.5926	954	27	132	3.03989	14.2038	2.22419	Up	2.00102e-11	5.15995e-11	GO:0019866//organelle inner membrane;GO:0031224//intrinsic to membrane	-	GO:0006810//transport	gi|68465553|ref|XP_723138.1|/1.60031e-173/potential mitochondrial ornithine transporter [Candida albicans SC5314]
orf19.1701	723	98	477	14.559	67.7267	2.21782	Up	1.39888e-14	6.44519e-14	GO:0044424//intracellular part	GO:0016861//intramolecular oxidoreductase activity, interconverting aldoses and ketoses	GO:0006098//pentose-phosphate shunt	gi|238880578|gb|EEQ44216.1|/4.67604e-123/ribose-5-phosphate isomerase [Candida albicans WO-1]
orf19.3174	2535	1044	5081	44.2349	205.755	2.21767	Up	1.15197e-12	3.6933e-12	GO:0044464//cell part	GO:0005088//Ras guanyl-nucleotide exchange factor activity	GO:0007266//Rho protein signal transduction	gi|28192690|gb|AAO25556.1|/0/guanine nucleotide exchange factor Cdc24 [Candida albicans]
orf19.4157	873	503	2443	61.8866	287.269	2.21471	Up	3.2263e-13	1.20942e-12	-	GO:0016628//oxidoreductase activity, acting on the CH-CH group of donors, NAD or NADP as acceptor	GO:0008152//metabolic process	gi|238881736|gb|EEQ45374.1|/3.20711e-162/sporulation protein SPS19 [Candida albicans WO-1]
orf19.657	1158	1112	5393	103.143	478.082	2.21261	Up	4.97824e-12	1.39811e-11	GO:0044424//intracellular part	GO:0046872//metal ion binding;GO:0016765//transferase activity, transferring alkyl or aryl (other than methyl) groups;GO:0032559	GO:0044237//cellular metabolic process	gi|7271000|emb|CAB77637.1|/0/S-adenosylmethionine synthetase 2 [Candida albicans]
orf19.299	1413	864	4177	65.6772	303.461	2.20805	Up	0	0	-	GO:0046914//transition metal ion binding;GO:0008235//metalloexopeptidase activity	GO:0019538//protein metabolic process	gi|68471641|ref|XP_720127.1|/0/hypothetical protein CaO19.7931 [Candida albicans SC5314]
orf19.2599	855	363	1743	45.6019	209.272	2.19821	Up	0	0	GO:0031224//intrinsic to membrane	-	GO:0006810//transport	gi|68475282|ref|XP_718359.1|/8.71139e-157/likely mitochondrial carnitine transport protein [Candida albicans SC5314]
orf19.5811	1686	24	115	1.52896	7.00197	2.19521	Up	1.43667e-10	3.53332e-10	-	GO:0008169//C-methyltransferase activity	GO:0006783//heme biosynthetic process;GO:0006730//one-carbon metabolic process	gi|68481426|ref|XP_715352.1|/0/potential uroporphyrin-3 C-methyltransferase [Candida albicans SC5314]
orf19.2496	798	140	666	18.8438	85.6745	2.18478	Up	4.75176e-14	2.10371e-13	GO:0044464//cell part	-	-	gi|68474781|ref|XP_718598.1|/6.62654e-124/possible transmembrane sensor/transporter [Candida albicans SC5314]
orf19.7517	1389	161	763	12.4499	56.39	2.1793	Up	0	0	-	GO:0004553//hydrolase activity, hydrolyzing O-glycosyl compounds	GO:0008152//metabolic process	gi|68474602|ref|XP_718674.1|/0/hypothetical protein CaO19.7517 [Candida albicans SC5314]
orf19.5723	1992	324	1533	17.4702	79.0011	2.17697	Up	0	0	GO:0042579//microbody	GO:0050662//coenzyme binding;GO:0016634	GO:0009062//fatty acid catabolic process	gi|68475709|ref|XP_718061.1|/0/potential fatty-acyl coenzyme A oxidase [Candida albicans SC5314]
orf19.789	3534	4977	23520	151.267	683.205	2.17522	Up	6.77746e-12	1.84494e-11	GO:0044424//intracellular part	GO:0043169//cation binding;GO:0016879//ligase activity, forming carbon-nitrogen bonds;GO:0016885;GO:0032559	GO:0006006//glucose metabolic process	gi|241954606|ref|XP_002420024.1|/0/pyruvate carboxylase isoform, putative [Candida dubliniensis CD36]
orf19.568	1149	246	1160	22.9963	103.638	2.17208	Up	3.8125e-13	1.39328e-12	-	GO:0016831//carboxy-lyase activity	GO:0006596//polyamine biosynthetic process	gi|68483683|ref|XP_714200.1|/0/hypothetical protein CaO19.568 [Candida albicans SC5314]
orf19.3535	867	468	2205	57.9788	261.078	2.17088	Up	1.04294e-12	3.36316e-12	-	-	-	gi|68482273|ref|XP_714894.1|/4.59653e-145/possible membrane protein [Candida albicans SC5314]
orf19.7610	2769	2336	10961	90.6135	406.357	2.16495	Up	0	0	-	GO:0004721//phosphoprotein phosphatase activity	GO:0006796//phosphate-containing compound metabolic process;GO:0006464//protein modification process	gi|68473131|ref|XP_719371.1|/0/hypothetical protein CaO19.7610 [Candida albicans SC5314]
orf19.1490	4230	1218	5679	30.9278	137.82	2.1558	Up	5.278e-12	1.46948e-11	-	-	-	gi|68466685|ref|XP_722538.1|/0/potential cell surface flocculin [Candida albicans SC5314]
orf19.3783	447	10	46	2.4029	10.564	2.13632	Up	3.0152e-06	5.90863e-06	-	-	-	gi|68477434|ref|XP_717188.1|/3.80402e-76/hypothetical protein CaO19.3783 [Candida albicans SC5314]
orf19.1721	846	39	179	4.9515	21.7201	2.1331	Up	1.03695e-13	4.37234e-13	-	GO:0016836//hydro-lyase activity;GO:0046914//transition metal ion binding	-	gi|68468465|ref|XP_721792.1|/1.50887e-153/hypothetical protein CaO19.1721 [Candida albicans SC5314]
orf19.1369	1305	39	176	3.20994	13.8447	2.10871	Up	1.03695e-13	4.36933e-13	-	GO:0016811//hydrolase activity, acting on carbon-nitrogen (but not peptide) bonds, in linear amides	-	gi|68483018|ref|XP_714543.1|/0/likely beta-alanine synthase [Candida albicans SC5314]
orf19.6287	1251	2449	11032	210.269	905.268	2.10611	Up	0	0	-	GO:0048037//cofactor binding;GO:0008483//transaminase activity	GO:0019752//carboxylic acid metabolic process	gi|68490046|ref|XP_711144.1|/0/potential aspartate aminotransferase [Candida albicans SC5314]
orf19.5921	1092	97	432	9.54096	40.6108	2.08966	Up	7.68274e-14	3.29168e-13	GO:0031224//intrinsic to membrane	-	GO:0051234//establishment of localization	gi|68465545|ref|XP_723134.1|/5.70073e-165/potential peroxisomal small molecule transporter [Candida albicans SC5314]
orf19.7193	2031	1213	5392	64.1496	272.534	2.08692	Up	6.11822e-12	1.68347e-11	GO:0016020//membrane;GO:0043231//intracellular membrane-bounded organelle	-	-	gi|68481746|ref|XP_715241.1|/0/hypothetical protein CaO19.7193 [Candida albicans SC5314]
orf19.3782	1662	153	680	9.88788	42.0008	2.08668	Up	0	0	-	GO:0016747//transferase activity, transferring acyl groups other than amino-acyl groups	-	gi|68477273|ref|XP_717263.1|/0/hypothetical protein CaO19.11263 [Candida albicans SC5314]
orf19.4608	1800	91	404	5.43015	23.0403	2.0851	Up	0	0	-	GO:0046872//metal ion binding;GO:0016831//carboxy-lyase activity;GO:0019842//vitamin binding	-	gi|238881655|gb|EEQ45293.1|/0/pyruvate decarboxylase isozyme 1 [Candida albicans WO-1]
orf19.2125	456	61	270	14.3684	60.7826	2.08076	Up	3.04202e-14	1.36356e-13	-	-	-	gi|238882944|gb|EEQ46582.1|/7.59637e-59/conserved hypothetical protein [Candida albicans WO-1]
orf19.5867	1077	121	533	12.0674	50.8033	2.07381	Up	3.68594e-14	1.63778e-13	-	-	-	gi|68465443|ref|XP_723083.1|/2.39499e-115/potential cell wall integrity factor [Candida albicans SC5314]
orf19.1405	966	16	70	1.77904	7.43877	2.06396	Up	3.46184e-08	7.59716e-08	-	GO:0016791//phosphatase activity	-	gi|68482888|ref|XP_714670.1|/5.81039e-171/potential p-nitrophenyl phosphatase [Candida albicans SC5314]
orf19.6972	1653	88	383	5.71811	23.7852	2.05645	Up	2.9754e-14	1.33565e-13	-	-	GO:0070882	gi|68482737|ref|XP_714678.1|/0/potential chromatin-binding protein [Candida albicans SC5314]
orf19.2098	1476	1443	6264	105.008	435.658	2.05269	Up	2.76424e-12	8.29272e-12	-	GO:0048037//cofactor binding;GO:0008483//transaminase activity	GO:0008152//metabolic process	gi|68472958|ref|XP_719544.1|/0/hypothetical protein CaO19.2098 [Candida albicans SC5314]
orf19.1586	888	6	26	0.72574	3.00566	2.05016	Up	0.000536872	0.000880954	-	GO:0004620//phospholipase activity;GO:0042578//phosphoric ester hydrolase activity	GO:0044238//primary metabolic process;GO:0007165//signal transduction	gi|68466865|ref|XP_722628.1|/6.41775e-174/phosphatidylinositol-specific phospholipase C [Candida albicans SC5314]
orf19.3352	999	111	481	11.9344	49.4265	2.05016	Up	0	0	-	GO:0003824//catalytic activity	GO:0008152//metabolic process	gi|68475113|ref|XP_718442.1|/0/hypothetical protein CaO19.10860 [Candida albicans SC5314]
orf19.972	861	44	190	5.48899	22.6533	2.04511	Up	7.72716e-14	3.30146e-13	GO:0044464//cell part	GO:0016788//hydrolase activity, acting on ester bonds	GO:0006259//DNA metabolic process	gi|68478257|ref|XP_716870.1|/2.73551e-166/potential DNA replication structure-specific endonuclease subunit [Candida albicans SC5314]
orf19.5645	1323	1595	6877	129.492	533.604	2.0429	Up	8.36264e-12	2.24744e-11	GO:0044424//intracellular part	GO:0016835//carbon-oxygen lyase activity;GO:0016765//transferase activity, transferring alkyl or aryl (other than methyl) groups;GO:0048037//cofactor binding	GO:0000097//sulfur amino acid biosynthetic process	gi|68485391|ref|XP_713373.1|/0/O-acetylhomoserine O-acetylserine sulphydrylase [Candida albicans SC5314]
orf19.288	1845	841	3624	48.9601	201.638	2.04209	Up	1.18772e-12	3.77035e-12	-	GO:0016646//oxidoreductase activity, acting on the CH-NH group of donors, NAD or NADP as acceptor	GO:0000096//sulfur amino acid metabolic process	gi|68471621|ref|XP_720117.1|/0/likely methylenetetrahydrofolate reductase [Candida albicans SC5314]
orf19.4600	708	122	525	18.5084	76.1213	2.04012	Up	7.0166e-14	3.02963e-13	-	-	-	gi|68466085|ref|XP_722817.1|/7.72956e-123/hypothetical protein CaO19.12069 [Candida albicans SC5314]
orf19.1652	2130	1628	6974	82.0952	336.111	2.03357	Up	7.077e-12	1.9222e-11	GO:0042579//microbody	GO:0050662//coenzyme binding;GO:0016634	GO:0009062//fatty acid catabolic process	gi|68468339|ref|XP_721729.1|/0/potential fatty-acyl coenzyme A oxidase [Candida albicans SC5314]
orf19.7190	1062	56	239	5.66378	23.1022	2.02819	Up	1.35447e-14	6.25471e-14	-	GO:0003677//DNA binding;GO:0000702//oxidized base lesion DNA N-glycosylase activity;GO:0016835//carbon-oxygen lyase activity	GO:0006281//DNA repair	gi|68481742|ref|XP_715239.1|/0/hypothetical protein CaO19.7190 [Candida albicans SC5314]
orf19.2284	1020	217	925	22.8509	93.094	2.02644	Up	3.47944e-13	1.28929e-12	-	GO:0000166//nucleotide binding	-	gi|68482482|ref|XP_714873.1|/0/hypothetical protein CaO19.2284 [Candida albicans SC5314]
orf19.4482	1767	56	238	3.40404	13.8268	2.02214	Up	1.35447e-14	6.26418e-14	-	-	-	gi|238879159|gb|EEQ42797.1|/0/conserved hypothetical protein [Candida albicans WO-1]
orf19.7472	4581	109	462	2.55569	10.3529	2.01825	Up	0	0	-	-	-	gi|68474514|ref|XP_718630.1|/0/hypothetical protein CaO19.7472 [Candida albicans SC5314]
orf19.2654	1659	219	927	14.1788	57.3606	2.01632	Up	5.4623e-13	1.89537e-12	-	GO:0016741	GO:0006730//one-carbon metabolic process	gi|68488236|ref|XP_712036.1|/0/hypothetical protein CaO19.2654 [Candida albicans SC5314]
orf19.4651	420	8090	34043	2068.91	8320.68	2.00783	Up	0	0	-	-	-	gi|238881689|gb|EEQ45327.1|/1.15705e-21/conserved hypothetical protein [Candida albicans WO-1]
orf19.5928	336	857	3591	273.958	1097.13	2.0017	Up	1.17439e-12	3.74948e-12	-	-	-	gi|41688725|sp|Q9HFQ4.1|RLA4_CANAL/5.97436e-31/RecName: Full=60S acidic ribosomal protein P2-B; Short=CaRP2B
orf19.3461	363	17	71	5.0302	20.0785	1.99697	Up	2.54368e-08	5.62461e-08	-	GO:0003676//nucleic acid binding;GO:0034061	GO:0006260//DNA replication	gi|68487236|ref|XP_712501.1|/1.42387e-64/hypothetical protein CaO19.3461 [Candida albicans SC5314]
orf19.3895	1752	18576	77069	1138.84	4515.71	1.98739	Up	0	0	-	GO:0004553//hydrolase activity, hydrolyzing O-glycosyl compounds	GO:0008152//metabolic process	gi|68467936|ref|XP_721807.1|/0/chitinase Cht2 [Candida albicans SC5314]
orf19.3152	2016	162	671	8.63112	34.1674	1.985	Up	0	0	-	GO:0046914//transition metal ion binding;GO:0016641//oxidoreductase activity, acting on the CH-NH2 group of donors, oxygen as acceptor;GO:0048037//cofactor binding	GO:0006807//nitrogen compound metabolic process	gi|68491657|ref|XP_710384.1|/0/likely peroxisomal copper amine oxidase genes [Candida albicans SC5314]
orf19.642	2775	1084	4481	41.9575	165.765	1.98214	Up	4.28302e-12	1.22653e-11	-	-	-	gi|238879965|gb|EEQ43603.1|/0/conserved hypothetical protein [Candida albicans WO-1]
orf19.4577	3312	70	289	2.27013	8.95752	1.98032	Up	0	0	-	-	-	gi|68466039|ref|XP_722794.1|/0/hypothetical protein CaO19.12046 [Candida albicans SC5314]
orf19.4688	756	1157	4745	164.382	644.309	1.9707	Up	4.18132e-12	1.20134e-11	-	-	-	gi|68466251|ref|XP_722900.1|/5.53817e-77/hypothetical protein CaO19.12157 [Candida albicans SC5314]
orf19.7359	2196	753	3081	36.8303	144.026	1.96736	Up	1.37979e-12	4.32838e-12	GO:0044464//cell part	GO:0046914//transition metal ion binding	-	gi|68478663|ref|XP_716600.1|/0/potential zinc finger protein [Candida albicans SC5314]
orf19.5870	885	58	237	7.03927	27.4907	1.96544	Up	1.13243e-14	5.25715e-14	GO:0019866//organelle inner membrane;GO:0031224//intrinsic to membrane	-	GO:0006810//transport	gi|238880833|gb|EEQ44471.1|/1.16816e-159/tricarboxylate transport protein [Candida albicans WO-1]
orf19.2305	375	25	102	7.16064	27.9222	1.96325	Up	8.5334e-11	2.12086e-10	GO:0043234//protein complex	GO:0005515//protein binding	GO:0044267//cellular protein metabolic process	gi|68484152|ref|XP_713968.1|/4.52904e-63/hypothetical protein CaO19.9841 [Candida albicans SC5314]
orf19.5711	1866	398	1623	22.9094	89.2867	1.9625	Up	7.92478e-13	2.62471e-12	-	-	-	gi|68475687|ref|XP_718050.1|/0/potential phosphatidylinositol transporter Csr1p [Candida albicans SC5314]
orf19.4894	735	107	436	15.6365	60.8947	1.9614	Up	0	0	-	-	-	gi|68464997|ref|XP_723576.1|/1.22657e-134/hypothetical protein CaO19.4894 [Candida albicans SC5314]
orf19.133	324	39	158	12.9289	50.0602	1.95306	Up	1.03695e-13	4.36332e-13	-	-	-	gi|68483557|ref|XP_714339.1|/3.18783e-48/hypothetical protein CaO19.133 [Candida albicans SC5314]
orf19.6414	1923	375	1503	20.9457	80.2342	1.93756	Up	0	0	-	-	-	gi|68479443|ref|XP_716253.1|/0/hypothetical protein CaO19.6414 [Candida albicans SC5314]
orf19.7288	1323	349	1398	28.334	108.474	1.93675	Up	1.86517e-13	7.36196e-13	-	GO:0003995//acyl-CoA dehydrogenase activity;GO:0050662//coenzyme binding	GO:0008152//metabolic process	gi|238880276|gb|EEQ43914.1|/0/hypothetical protein CAWG_02170 [Candida albicans WO-1]
orf19.4145	3258	334	1336	11.0113	42.0955	1.93468	Up	3.66818e-13	1.34698e-12	GO:0043231//intracellular membrane-bounded organelle	GO:0046914//transition metal ion binding;GO:0001071//nucleic acid binding transcription factor activity	GO:0006351//transcription, DNA-dependent	gi|68489655|ref|XP_711349.1|/0/potential fungal zinc cluster transcription factor [Candida albicans SC5314]
orf19.5069	732	181	721	26.5589	101.112	1.92869	Up	1.59206e-13	6.37867e-13	-	-	-	gi|68476629|ref|XP_717607.1|/3.26889e-63/hypothetical protein CaO19.5069 [Candida albicans SC5314]
orf19.4504	1050	103	409	10.5364	39.9866	1.92414	Up	0	0	-	GO:0016616//oxidoreductase activity, acting on the CH-OH group of donors, NAD or NADP as acceptor;GO:0046914//transition metal ion binding	GO:0008152//metabolic process	gi|68486390|ref|XP_712930.1|/0/potential secondary alcohol dehydrogenase [Candida albicans SC5314]
orf19.3254	1821	180	711	10.6171	40.0811	1.91653	Up	3.33066e-13	1.24244e-12	-	-	-	gi|68476007|ref|XP_717944.1|/0/hypothetical protein CaO19.3254 [Candida albicans SC5314]
orf19.3029	1509	464	1827	33.0272	124.288	1.91196	Up	0	0	-	GO:0016829//lyase activity	-	gi|68468937|ref|XP_721527.1|/0/potential enoyl-CoA hydratase/isomerase [Candida albicans SC5314]
orf19.944	1044	333	1309	34.2599	128.712	1.90955	Up	5.22916e-13	1.82692e-12	-	GO:0015922	GO:0008152//metabolic process	gi|238882457|gb|EEQ46095.1|/0/hypothetical protein CAWG_04439 [Candida albicans WO-1]
orf19.4076	3285	198	777	6.474	24.281	1.9071	Up	0	0	-	GO:0016668//oxidoreductase activity, acting on a sulfur group of donors, NAD or NADP as acceptor	GO:0008152//metabolic process	gi|68483588|ref|XP_714247.1|/0/potential assimilatory sulfite reductase subunit [Candida albicans SC5314]
orf19.993	525	101	396	20.6635	77.4312	1.90583	Up	0	0	-	GO:0016701//oxidoreductase activity, acting on single donors with incorporation of molecular oxygen	GO:0008152//metabolic process	gi|68489882|ref|XP_711234.1|/3.56335e-100/potential DOPA-dioxygenase [Candida albicans SC5314]
orf19.1671	1413	533	2081	40.5161	151.185	1.89975	Up	0	0	GO:0030312//external encapsulating structure	GO:0016798//hydrolase activity, acting on glycosyl bonds;GO:0030247//polysaccharide binding	GO:0044238//primary metabolic process;GO:0045229//external encapsulating structure organization	gi|68468377|ref|XP_721748.1|/0/hypothetical protein CaO19.1671 [Candida albicans SC5314]
orf19.857	1659	27	105	1.74808	6.49715	1.89404	Up	3.70994e-11	9.36522e-11	-	GO:0000166//nucleotide binding;GO:0050662//coenzyme binding;GO:0016709//oxidoreductase activity, acting on paired donors, with incorporation or reduction of molecular oxygen, NADH or NADPH as one donor, and incorporation of one atom of oxygen	GO:0008152//metabolic process	gi|68469703|ref|XP_721103.1|/0/hypothetical protein CaO19.8477 [Candida albicans SC5314]
orf19.751	702	52	202	7.95626	29.5389	1.89245	Up	5.19584e-14	2.29202e-13	-	-	-	gi|68484915|ref|XP_713596.1|/8.13228e-117/hypothetical protein CaO19.8371 [Candida albicans SC5314]
orf19.6586	942	1129	4374	128.732	476.659	1.88859	Up	3.6704e-12	1.07372e-11	-	-	-	gi|68469270|ref|XP_721422.1|/6.54137e-79/hypothetical protein CaO19.6586 [Candida albicans SC5314]
orf19.2724	1497	3427	13256	245.887	909.014	1.88631	Up	0	0	-	-	-	gi|68470934|ref|XP_720474.1|/9.80363e-140/hypothetical protein CaO19.2724 [Candida albicans SC5314]
orf19.346	1563	632	2438	43.4311	160.123	1.88238	Up	8.30446e-14	3.53084e-13	-	GO:0048037//cofactor binding;GO:0016846//carbon-sulfur lyase activity;GO:0047635	GO:0008652//cellular amino acid biosynthetic process	gi|68471735|ref|XP_720174.1|/0/hypothetical protein CaO19.7979 [Candida albicans SC5314]
orf19.5268	513	131	505	27.4282	101.054	1.8814	Up	1.26565e-13	5.17952e-13	GO:0043234//protein complex;GO:0043231//intracellular membrane-bounded organelle	-	GO:0006355//regulation of transcription, DNA-dependent	gi|74585817|sp|Q5A3K2.1|MED10_CANAL/1.02426e-80/RecName: Full=Mediator of RNA polymerase II transcription subunit 10; AltName: Full=Mediator complex subunit 10
orf19.1037	1773	165	634	9.99581	36.708	1.8767	Up	5.63994e-14	2.47364e-13	-	-	-	gi|68492065|ref|XP_710182.1|/0/hypothetical protein CaO19.1130 [Candida albicans SC5314]
orf19.7314	798	660	2534	88.8349	325.975	1.87556	Up	0	0	-	GO:0046914//transition metal ion binding;GO:0016702//oxidoreductase activity, acting on single donors with incorporation of molecular oxygen, incorporation of two atoms of oxygen	GO:0006534//cysteine metabolic process	gi|68479028|ref|XP_716448.1|/4.72692e-138/hypothetical protein CaO19.7314 [Candida albicans SC5314]
orf19.5641	1311	1998	7651	163.695	599.095	1.87177	Up	0	0	-	GO:0048037//cofactor binding;GO:0008483//transaminase activity	-	gi|238881802|gb|EEQ45440.1|/0/ornithine aminotransferase [Candida albicans WO-1]
orf19.4873	513	76	289	15.9125	57.831	1.86168	Up	3.33066e-15	1.57127e-14	-	-	-	gi|68464959|ref|XP_723557.1|/4.30332e-79/hypothetical protein CaO19.4873 [Candida albicans SC5314]
orf19.6709	927	432	1642	50.0549	181.833	1.86103	Up	1.13642e-12	3.64729e-12	-	GO:0003824//catalytic activity	-	gi|68472027|ref|XP_719809.1|/0/potential epoxide hydrolase [Candida albicans SC5314]
orf19.6688	981	3644	13835	398.981	1447.74	1.85941	Up	7.73426e-12	2.09143e-11	-	-	-	gi|68487965|ref|XP_712141.1|/1.40592e-87/hypothetical protein CaO19.6688 [Candida albicans SC5314]
orf19.5203	2370	221	834	10.0158	36.1242	1.85068	Up	1.90292e-13	7.46756e-13	-	-	-	gi|68491608|ref|XP_710411.1|/0/hypothetical protein CaO19.5203 [Candida albicans SC5314]
orf19.7200	525	83	312	16.9809	61.0064	1.84504	Up	1.48548e-13	6.01073e-13	-	-	-	gi|68481760|ref|XP_715248.1|/5.52301e-85/hypothetical protein CaO19.7200 [Candida albicans SC5314]
orf19.558	1896	252	947	14.2759	51.2734	1.84462	Up	2.15828e-13	8.2992e-13	-	GO:0016301//kinase activity	GO:0006071//glycerol metabolic process;GO:0006796//phosphate-containing compound metabolic process	gi|68491766|ref|XP_710325.1|/0/potential glycerol kinase Gut1p [Candida albicans SC5314]
orf19.930	906	2521	9455	298.874	1071.31	1.84176	Up	0	0	GO:0019866//organelle inner membrane;GO:0043231//intracellular membrane-bounded organelle;GO:0031224//intrinsic to membrane	-	GO:0006810//transport	gi|68478175|ref|XP_716829.1|/5.45953e-160/potential mitochondrial inner membrane ATP/ADP translocator [Candida albicans SC5314]
orf19.169	2667	273	1023	10.9947	39.3761	1.84052	Up	2.02504e-13	7.87601e-13	GO:0016020//membrane	GO:0008168//methyltransferase activity	GO:0006629//lipid metabolic process;GO:0044237//cellular metabolic process	gi|68490968|ref|XP_710706.1|/0/potential phosphatidylethanolamine N-methyltransferase Cho2 [Candida albicans SC5314]
orf19.5157	612	93	348	16.322	58.3724	1.83847	Up	5.4623e-14	2.4009e-13	-	-	-	gi|68477951|ref|XP_716979.1|/8.86153e-116/potential protein tyrosine phosphatase-like protein [Candida albicans SC5314]
orf19.5952	1317	259	968	21.1231	75.4518	1.83674	Up	2.07168e-13	8.02678e-13	-	-	-	gi|68465603|ref|XP_723163.1|/0/potential F box protein [Candida albicans SC5314]
orf19.5130	1683	7966	29751	508.392	1814.67	1.83569	Up	0	0	GO:0043231//intracellular membrane-bounded organelle	GO:0016862//intramolecular oxidoreductase activity, interconverting keto- and enol-groups;GO:0015036//disulfide oxidoreductase activity	GO:0018904;GO:0019725//cellular homeostasis	gi|68477899|ref|XP_716953.1|/0/likely protein disulfide isomerase [Candida albicans SC5314]
orf19.6403.1	327	309	1154	101.497	362.275	1.83565	Up	7.73382e-13	2.56842e-12	GO:0005622//intracellular	-	GO:0006629//lipid metabolic process;GO:0044237//cellular metabolic process	gi|41688726|sp|Q9HFQ5.1|RLA2_CANAL/1.64417e-20/RecName: Full=60S acidic ribosomal protein P2-A; Short=CaRP2A
orf19.2813	129	18	67	14.9874	53.3169	1.83085	Up	1.70651e-07	3.604e-07	-	-	-	gi|68491565|ref|XP_710412.1|/3.36341e-13/hypothetical protein CaO19.12660 [Candida albicans SC5314]
orf19.3755	663	139	517	22.5187	80.0492	1.82976	Up	2.13384e-13	8.22591e-13	GO:0030529//ribonucleoprotein complex	GO:0003676//nucleic acid binding;GO:0016891//endoribonuclease activity, producing 5'-phosphomonoesters	GO:0010467//gene expression	gi|68490780|ref|XP_710785.1|/5.2075e-123/likely mitochondrial ribosomal protein L15 [Candida albicans SC5314]
orf19.4114	2154	379	1407	18.8989	67.0546	1.82703	Up	8.12684e-14	3.46496e-13	-	GO:0016874//ligase activity	-	gi|68483662|ref|XP_714284.1|/0/potential long chain fatty acyl-CoA synthetase [Candida albicans SC5314]
orf19.3415	2439	1838	6793	80.9425	285.91	1.82059	Up	4.52926e-12	1.2862e-11	-	GO:0004672//protein kinase activity;GO:0032559	GO:0006464//protein modification process	gi|3850140|emb|CAA21941.1|/0/serine /threonine protein kinase [Candida albicans]
orf19.3111	900	21238	78450	2534.63	8948.09	1.81981	Up	0	0	-	-	-	gi|353526271|sp|P87020.2|PRA1_CANAL/1.37905e-147/RecName: Full=pH-regulated antigen PRA1; AltName: Full=58 kDa fibrinogen-binding mannoprotein; Flags: Precursor
orf19.5809	1362	88	325	6.93982	24.4955	1.81955	Up	2.9754e-14	1.3386e-13	-	GO:0016769//transferase activity, transferring nitrogenous groups;GO:0048037//cofactor binding;GO:0016846//carbon-sulfur lyase activity	GO:0008652//cellular amino acid biosynthetic process	gi|68481422|ref|XP_715350.1|/0/hypothetical protein CaO19.5809 [Candida albicans SC5314]
orf19.6734	2247	2258	8319	107.935	380.056	1.81605	Up	0	0	-	-	-	gi|114213475|dbj|BAF31137.1|/0/transcription factor Tcc1p [Candida albicans]
orf19.4591	1899	1933	7107	109.333	384.186	1.81308	Up	2.82662e-13	1.07009e-12	GO:0019866//organelle inner membrane;GO:0042579//microbody	GO:0016406	GO:0051234//establishment of localization;GO:0032787//monocarboxylic acid metabolic process;GO:0044238//primary metabolic process	gi|68466067|ref|XP_722808.1|/0/hypothetical protein CaO19.12060 [Candida albicans SC5314]
orf19.403	765	135	495	18.9546	66.4238	1.80915	Up	2.49134e-13	9.47856e-13	-	GO:0019900//kinase binding	GO:0051726//regulation of cell cycle	gi|68488532|ref|XP_711891.1|/2.78006e-116/hypothetical protein CaO19.403 [Candida albicans SC5314]
orf19.4506	1254	51	187	4.36833	15.3082	1.80915	Up	6.4393e-15	3.0238e-14	-	GO:0046912//transferase activity, transferring acyl groups, acyl groups converted into alkyl on transfer;GO:0016747//transferase activity, transferring acyl groups other than amino-acyl groups	GO:0043436	gi|238882226|gb|EEQ45864.1|/0/homocitrate synthase, mitochondrial precursor [Candida albicans WO-1]
orf19.1704	1233	186	682	16.2029	56.7808	1.80915	Up	6.58584e-13	2.23203e-12	-	GO:0016408	GO:0044238//primary metabolic process	gi|68468431|ref|XP_721775.1|/0/potential peroxisomal 3-ketoacyl-CoA thiolase [Candida albicans SC5314]
orf19.3099	1110	143	524	13.8374	48.4606	1.80823	Up	0	0	-	GO:0016763//transferase activity, transferring pentosyl groups	GO:0006568//tryptophan metabolic process	gi|68481267|ref|XP_715408.1|/0/likely anthranilate phosphoribosyl transferase [Candida albicans SC5314]
orf19.4909.1	321	1013	3709	338.959	1186.13	1.80708	Up	2.92432e-12	8.75577e-12	GO:0030529//ribonucleoprotein complex	GO:0005198//structural molecule activity	GO:0010467//gene expression;GO:0014071	gi|238878555|gb|EEQ42193.1|/1.29475e-57/60S ribosomal protein L44 [Candida albicans WO-1]
orf19.3670	1548	313	1144	21.7178	75.8639	1.80453	Up	0	0	GO:0044424//intracellular part	GO:0016773//phosphotransferase activity, alcohol group as acceptor;GO:0032559	GO:0016310//phosphorylation;GO:0019318//hexose metabolic process	gi|68484609|ref|XP_713764.1|/0/hypothetical protein CaO19.3670 [Candida albicans SC5314]
orf19.2923	1428	88	321	6.61907	23.0758	1.80168	Up	2.9754e-14	1.33663e-13	-	-	-	gi|68480958|ref|XP_715632.1|/0/potential transmembrane protein [Candida albicans SC5314]
orf19.5001	1776	739	2694	44.6935	155.717	1.80079	Up	4.67848e-13	1.6563e-12	GO:0043231//intracellular membrane-bounded organelle	GO:0046914//transition metal ion binding;GO:0003676//nucleic acid binding;GO:0001071//nucleic acid binding transcription factor activity	GO:0006351//transcription, DNA-dependent	gi|68467315|ref|XP_722319.1|/0/hypothetical protein CaO19.12468 [Candida albicans SC5314]
orf19.4197	906	480	1746	56.9057	197.832	1.79763	Up	9.72112e-13	3.15305e-12	GO:0031224//intrinsic to membrane	-	GO:0051234//establishment of localization	gi|68489770|ref|XP_711272.1|/1.535e-162/potential mitochondrial carrier family protein Yhm2 [Candida albicans SC5314]
orf19.1144	3366	1471	5341	46.9398	162.888	1.79499	Up	8.92486e-12	2.39117e-11	-	-	-	gi|68486126|ref|XP_713013.1|/0/hypothetical protein CaO19.1144 [Candida albicans SC5314]
orf19.6829	1965	90	326	4.91952	17.0308	1.79156	Up	0	0	-	-	-	gi|68472251|ref|XP_719921.1|/0/hypothetical protein CaO19.6829 [Candida albicans SC5314]
orf19.1146	369	155	561	45.1178	156.069	1.79041	Up	3.9746e-13	1.43706e-12	-	-	-	gi|68486128|ref|XP_713014.1|/1.8492e-64/hypothetical protein CaO19.1146 [Candida albicans SC5314]
orf19.5098	963	34	123	3.79224	13.1117	1.78973	Up	2.68518e-12	8.07138e-12	-	GO:0016835//carbon-oxygen lyase activity;GO:0003676//nucleic acid binding;GO:0051536//iron-sulfur cluster binding;GO:0004518//nuclease activity	GO:0006281//DNA repair	gi|68476685|ref|XP_717635.1|/0/hypothetical protein CaO19.5098 [Candida albicans SC5314]
orf19.4560	1389	1237	4456	95.6556	329.324	1.78359	Up	3.71748e-12	1.08438e-11	-	-	-	gi|68466007|ref|XP_722778.1|/0/hypothetical protein CaO19.12029 [Candida albicans SC5314]
orf19.4128	1305	89	319	7.32525	25.0934	1.77636	Up	0	0	-	GO:0003824//catalytic activity	-	gi|68491862|ref|XP_710286.1|/0/potential lipid particle serine esterase [Candida albicans SC5314]
orf19.4735	1053	458	1638	46.7175	159.686	1.7732	Up	1.73972e-12	5.37748e-12	-	-	-	gi|68464689|ref|XP_723422.1|/0/hypothetical protein CaO19.4735 [Candida albicans SC5314]
orf19.7520	1227	845	3021	73.9699	252.747	1.77268	Up	0	0	GO:0042579//microbody	GO:0016408	GO:0032787//monocarboxylic acid metabolic process;GO:0044238//primary metabolic process	gi|238879515|gb|EEQ43153.1|/0/3-ketoacyl-CoA thiolase A [Candida albicans WO-1]
orf19.5249	609	30	107	5.29111	18.0363	1.76926	Up	9.19678e-11	2.28203e-10	-	-	-	gi|241950113|ref|XP_002417779.1|/1.95517e-107/conserved hypothetical protein [Candida dubliniensis CD36]
orf19.6459	921	173	617	20.1757	68.771	1.76918	Up	3.89688e-13	1.41734e-12	GO:0044464//cell part	GO:0016791//phosphatase activity	-	gi|238883401|gb|EEQ47039.1|/5.04551e-153/hypothetical protein CAWG_05594 [Candida albicans WO-1]
orf19.203	1512	541	1929	38.4316	130.967	1.76883	Up	0	0	-	-	-	gi|68487055|ref|XP_712588.1|/6.18088e-166/hypothetical protein CaO19.203 [Candida albicans SC5314]
orf19.4772	1164	105	374	9.689	32.9837	1.76733	Up	0	0	-	-	-	gi|74656729|sp|Q5AQ36.1|SHO1_CANAL/7.9264e-168/RecName: Full=High osmolarity signaling protein SHO1; AltName: Full=Osmosensor SHO1
orf19.7012	522	41	146	8.43638	28.7119	1.76695	Up	1.69642e-13	6.75695e-13	GO:0030529//ribonucleoprotein complex	GO:0005198//structural molecule activity	GO:0010467//gene expression	gi|68471059|ref|XP_720306.1|/2.6023e-87/likely mitochondrial ribosomal protein S16 [Candida albicans SC5314]
orf19.3309	1248	283	1007	24.3565	82.8314	1.76587	Up	0	0	-	-	-	gi|68475031|ref|XP_718401.1|/0/potential GAG-like protein [Candida albicans SC5314]
orf19.7017	1008	345	1225	36.7622	124.754	1.7628	Up	1.01119e-12	3.2694e-12	GO:0043231//intracellular membrane-bounded organelle	GO:0003677//DNA binding;GO:0001071//nucleic acid binding transcription factor activity	GO:0006351//transcription, DNA-dependent	gi|68471069|ref|XP_720311.1|/3.42865e-129/hypothetical protein CaO19.7017 [Candida albicans SC5314]
orf19.7068	1296	105	369	8.70216	29.2282	1.74791	Up	0	0	GO:0043231//intracellular membrane-bounded organelle	GO:0046914//transition metal ion binding;GO:0003676//nucleic acid binding;GO:0001071//nucleic acid binding transcription factor activity	GO:0006351//transcription, DNA-dependent	gi|68471167|ref|XP_720360.1|/0/hypothetical protein CaO19.7068 [Candida albicans SC5314]
orf19.2182	6603	3094	10854	50.3294	168.744	1.74536	Up	0	0	GO:0043234//protein complex	-	-	gi|68479947|ref|XP_716023.1|/0/hypothetical protein CaO19.2182 [Candida albicans SC5314]
orf19.4602	999	13400	46953	1440.73	4824.78	1.74367	Up	0	0	-	GO:0016615//malate dehydrogenase activity	GO:0009060//aerobic respiration;GO:0005975//carbohydrate metabolic process;GO:0043648//dicarboxylic acid metabolic process	gi|68466091|ref|XP_722820.1|/6.73083e-170/likely mitochondrial malate dehydrogenase [Candida albicans SC5314]
orf19.1599	357	12	42	3.6104	12.0771	1.74204	Up	6.71662e-05	0.000118755	-	-	-	gi|68491016|ref|XP_710680.1|/1.58311e-63/hypothetical protein CaO19.1599 [Candida albicans SC5314]
orf19.5650	825	239	835	31.1162	103.899	1.73945	Up	7.17204e-13	2.4001e-12	-	GO:0016646//oxidoreductase activity, acting on the CH-NH group of donors, NAD or NADP as acceptor	GO:0006560//proline metabolic process	gi|68485496|ref|XP_713331.1|/4.39324e-142/hypothetical protein CaO19.5650 [Candida albicans SC5314]
orf19.6500	1320	393	1369	31.9787	106.466	1.7352	Up	1.12133e-13	4.67972e-13	GO:0044429//mitochondrial part	GO:0008080//N-acetyltransferase activity	GO:0006525//arginine metabolic process	gi|74587143|sp|Q5AH38.1|ARGJ_CANAL/0/RecName: Full=Arginine biosynthesis bifunctional protein ArgJ, mitochondrial; Includes: RecName: Full=Glutamate N-acetyltransferase; Short=GAT; AltName: Full=Ornithine acetyltransferase; Short=OATase; AltName: Full=Ornithine transacetylase; Includes: RecName: Full=Amino-acid acetyltransferase; AltName: Full=N-acetylglutamate synthase; Short=AGS; Contains: RecN…
orf19.2209	2028	3498	12138	185.266	614.411	1.72961	Up	0	0	GO:0016020//membrane	-	GO:0006810//transport	gi|68480005|ref|XP_716049.1|/0/hypothetical protein CaO19.2209 [Candida albicans SC5314]
orf19.7013	1230	13	45	1.13522	3.75567	1.7261	Up	4.0699e-05	7.34239e-05	-	-	-	gi|68471061|ref|XP_720307.1|/0/hypothetical protein CaO19.7013 [Candida albicans SC5314]
orf19.1158	894	21	72	2.52304	8.26752	1.71229	Up	2.15522e-07	4.51887e-07	-	-	-	gi|68486081|ref|XP_713057.1|/1.35698e-163/hypothetical protein CaO19.8750 [Candida albicans SC5314]
orf19.5611	1032	12	41	1.24895	4.07835	1.70727	Up	0.000103363	0.000180252	-	GO:0048037//cofactor binding;GO:0016616//oxidoreductase activity, acting on the CH-OH group of donors, NAD or NADP as acceptor	GO:0008152//metabolic process	gi|68473456|ref|XP_719286.1|/0/potential oxidoreductase [Candida albicans SC5314]
orf19.5000	1683	253	864	16.1465	52.6999	1.70658	Up	4.97158e-13	1.74591e-12	-	GO:0004457//lactate dehydrogenase activity;GO:0005506//iron ion binding;GO:0000166//nucleotide binding	GO:0008152//metabolic process	gi|68467313|ref|XP_722318.1|/0/hypothetical protein CaO19.12467 [Candida albicans SC5314]
orf19.6608	2169	1719	5870	85.1254	277.817	1.70647	Up	4.4973e-12	1.27831e-11	-	-	-	gi|68489749|ref|XP_711307.1|/0/hypothetical protein CaO19.6608 [Candida albicans SC5314]
orf19.5792	1497	87	297	6.24224	20.3664	1.70606	Up	0	0	GO:0005789//endoplasmic reticulum membrane	GO:0016740//transferase activity	GO:0006497//protein lipidation	gi|74656300|sp|Q5A0L9.1|SMP3_CANAL/0/RecName: Full=GPI mannosyltransferase 4; AltName: Full=CaSMP3; AltName: Full=GPI mannosyltransferase IV; Short=GPI-MT-IV
orf19.837.1	393	299	1013	81.7187	264.604	1.6951	Up	6.4393e-13	2.19331e-12	-	-	-	gi|223641669|emb|CAX43630.1|/6.27249e-36/basic helix-loop-helix transcription factor [Candida dubliniensis CD36]
orf19.7244	696	370	1251	57.0999	184.514	1.69217	Up	0	0	-	GO:0016823	-	gi|68482053|ref|XP_715044.1|/1.8328e-129/fumarylacetoacetate hydrolase family protein [Candida albicans SC5314]
orf19.245	1467	113	382	8.27354	26.7309	1.69193	Up	2.29372e-13	8.78684e-13	-	-	GO:0006259//DNA metabolic process	gi|68471802|ref|XP_719944.1|/0/hypothetical protein CaO19.245 [Candida albicans SC5314]
orf19.7466	6816	3837	12970	60.4651	195.34	1.69181	Up	1.2039e-11	3.19335e-11	-	GO:0016421//CoA carboxylase activity;GO:0016879//ligase activity, forming carbon-nitrogen bonds;GO:0032559	GO:0006631//fatty acid metabolic process	gi|68474502|ref|XP_718624.1|/0/hypothetical protein CaO19.7466 [Candida albicans SC5314]
orf19.5925	1134	81	273	7.67211	24.7132	1.68759	Up	6.66134e-14	2.88642e-13	-	-	-	gi|68465551|ref|XP_723137.1|/0/hypothetical protein CaO19.5925 [Candida albicans SC5314]
orf19.1429	441	30	101	7.30677	23.5106	1.686	Up	1.13724e-09	2.69291e-09	GO:0043234//protein complex;GO:0043231//intracellular membrane-bounded organelle	-	-	gi|74584431|sp|Q59P87.1|MED31_CANAL/1.61371e-68/RecName: Full=Mediator of RNA polymerase II transcription subunit 31; AltName: Full=Mediator complex subunit 31
orf19.6938	1035	373	1253	38.7089	124.277	1.68282	Up	3.92574e-13	1.42192e-12	-	GO:0016757//transferase activity, transferring glycosyl groups	GO:0055086//nucleobase-containing small molecule metabolic process	gi|74656164|sp|Q59ST1.1|MTAP_CANAL/0/RecName: Full=S-methyl-5'-thioadenosine phosphorylase; AltName: Full=5'-methylthioadenosine phosphorylase; Short=MTA phosphorylase; Short=MTAP; Short=MTAPase
orf19.7298	3030	417	1400	14.7821	47.4314	1.68199	Up	2.33146e-14	1.05746e-13	-	GO:0008375//acetylglucosaminyltransferase activity	GO:0006023	gi|68478998|ref|XP_716433.1|/0/chitin synthase Chs2p [Candida albicans SC5314]
orf19.6565	1125	127	424	12.1253	38.6895	1.67392	Up	1.12355e-13	4.68259e-13	GO:0031224//intrinsic to membrane	-	GO:0034613//cellular protein localization	gi|68469228|ref|XP_721401.1|/0/hypothetical protein CaO19.6565 [Candida albicans SC5314]
orf19.6141	1698	18	60	1.13862	3.62739	1.67165	Up	3.35996e-06	6.56529e-06	GO:0031224//intrinsic to membrane	GO:0022857//transmembrane transporter activity	GO:0071702	gi|241959038|ref|XP_002422238.1|/0/glucose transporter of the major facilitator superfamily, putative; hexose transporter, putative [Candida dubliniensis CD36]
orf19.3846	2055	78	260	4.07686	12.988	1.67165	Up	0	0	GO:0043231//intracellular membrane-bounded organelle	GO:0043169//cation binding;GO:0051536//iron-sulfur cluster binding;GO:0016836//hydro-lyase activity	GO:0006553//lysine metabolic process	gi|68477399|ref|XP_717326.1|/0/potential homoaconitase [Candida albicans SC5314]
orf19.6632	2376	364	1205	16.455	52.062	1.6617	Up	1.19682e-13	4.9475e-13	-	GO:0051536//iron-sulfur cluster binding;GO:0016836//hydro-lyase activity	GO:0009060//aerobic respiration	gi|68487910|ref|XP_712172.1|/0/potential mitochondrial aconitase [Candida albicans SC5314]
orf19.4807	975	210	695	23.1344	73.1746	1.66131	Up	6.03962e-14	2.63195e-13	GO:0044424//intracellular part	GO:0046872//metal ion binding;GO:0016462//pyrophosphatase activity	GO:0006793//phosphorus metabolic process	gi|238878643|gb|EEQ42281.1|/0/inorganic pyrophosphatase [Candida albicans WO-1]
orf19.6286	597	82	271	14.7531	46.5988	1.65928	Up	0	0	-	-	-	gi|68490044|ref|XP_711143.1|/2.69969e-90/hypothetical protein CaO19.6286 [Candida albicans SC5314]
orf19.6012	3837	299	979	8.36994	26.1921	1.64585	Up	6.4393e-13	2.19209e-12	-	-	-	gi|68473742|ref|XP_718974.1|/0/hypothetical protein CaO19.6012 [Candida albicans SC5314]
orf19.7360	363	11	36	3.25483	10.1807	1.64518	Up	0.000402918	0.000669959	-	-	-	gi|241953511|ref|XP_002419477.1|/3.53161e-39/SAGA-associated factor, putative; subunit of SAGA histone acetyltransferase complex, putative [Candida dubliniensis CD36]
orf19.5861.1	291	11	36	4.06015	12.6996	1.64518	Up	0.000402918	0.000669777	-	-	-	-
orf19.2992	321	455	1489	152.247	476.178	1.64509	Up	4.16556e-13	1.49286e-12	-	-	-	gi|3859692|emb|CAA21967.1|/8.74531e-30/60S ribosomal protein rpla1 [Candida albicans]
orf19.655	1638	459	1498	30.0983	93.8811	1.64115	Up	1.18661e-12	3.77074e-12	GO:0031224//intrinsic to membrane	GO:0015291//secondary active transmembrane transporter activity	GO:0015698//inorganic anion transport	gi|238878453|gb|EEQ42091.1|/0/inorganic phosphate transporter PHO84 [Candida albicans WO-1]
orf19.2649	1122	66	215	6.31821	19.671	1.63848	Up	0	0	-	GO:0019900//kinase binding	GO:0051726//regulation of cell cycle	gi|68488226|ref|XP_712031.1|/4.91779e-127/hypothetical protein CaO19.2649 [Candida albicans SC5314]
orf19.2202	726	130	423	19.2331	59.8114	1.63683	Up	0	0	-	GO:0016853//isomerase activity	-	gi|68479989|ref|XP_716042.1|/1.46251e-132/hypothetical protein CaO19.2202 [Candida albicans SC5314]
orf19.4159	1101	69	224	6.73139	20.8853	1.63351	Up	0	0	GO:0019866//organelle inner membrane;GO:0031224//intrinsic to membrane	-	GO:0006810//transport	gi|68486669|ref|XP_712763.1|/0/potential mitochondrial carrier protein [Candida albicans SC5314]
orf19.6265	393	525	1704	143.486	445.1	1.63322	Up	1.23679e-13	5.07839e-13	GO:0030529//ribonucleoprotein complex	GO:0005198//structural molecule activity	GO:0010467//gene expression	gi|68474286|ref|XP_718852.1|/2.52308e-69/likely cytosolic ribosomal protein S22 [Candida albicans SC5314]
orf19.7015	939	2138	6917	244.56	756.192	1.62857	Up	0	0	GO:0030529//ribonucleoprotein complex	GO:0005198//structural molecule activity	GO:0022613//ribonucleoprotein complex biogenesis;GO:0006412//translation	gi|68471065|ref|XP_720309.1|/2.27164e-140/likely cytosolic ribosomal acidic protein P0 [Candida albicans SC5314]
orf19.6783	2013	448	1448	23.9044	73.8422	1.62717	Up	0	0	-	GO:0003824//catalytic activity	GO:0033124//regulation of GTP catabolic process;GO:0015031//protein transport	gi|68472167|ref|XP_719879.1|/0/hypothetical protein CaO19.6783 [Candida albicans SC5314]
orf19.5280	1662	928	2999	59.9736	185.236	1.62697	Up	1.08846e-12	3.50256e-12	GO:0031224//intrinsic to membrane	GO:0005275//amine transmembrane transporter activity	GO:0006865//amino acid transport	gi|68479211|ref|XP_716411.1|/0/potential high affinity methionine permease [Candida albicans SC5314]
orf19.4890	2931	648	2090	23.7466	73.1999	1.62412	Up	0	0	-	GO:0004672//protein kinase activity;GO:0000166//nucleotide binding	-	gi|68464991|ref|XP_723573.1|/0/likely protein kinase [Candida albicans SC5314]
orf19.6443	804	237	758	31.6618	96.7817	1.61199	Up	3.25518e-13	1.218e-12	-	GO:0016863//intramolecular oxidoreductase activity, transposing C=C bonds	-	gi|68479497|ref|XP_716280.1|/3.31191e-147/potential enoyl-CoA hydratase/isomerase [Candida albicans SC5314]
orf19.6578	1644	258	824	16.8562	51.4524	1.60996	Up	3.7037e-13	1.35677e-12	GO:0031224//intrinsic to membrane	-	GO:0006810//transport	gi|68469254|ref|XP_721414.1|/0/hypothetical protein CaO19.6578 [Candida albicans SC5314]
orf19.6882.1	324	2251	7189	746.231	2277.74	1.60991	Up	0	0	GO:0030529//ribonucleoprotein complex	GO:0005198//structural molecule activity	GO:0010467//gene expression	gi|241951544|ref|XP_002418494.1|/1.20857e-55/ribosomal protein, large subunit, putative [Candida dubliniensis CD36]
orf19.4243	879	16	51	1.95512	5.95609	1.60711	Up	3.1856e-05	5.77945e-05	-	-	-	gi|68470613|ref|XP_720552.1|/1.04898e-144/hypothetical protein CaO19.4243 [Candida albicans SC5314]
orf19.3984	2529	1349	4298	57.2936	174.461	1.60646	Up	8.37686e-12	2.24928e-11	-	-	-	gi|68468108|ref|XP_721893.1|/0/hypothetical protein CaO19.3984 [Candida albicans SC5314]
orf19.4600.1	279	56	178	21.5589	65.4932	1.60306	Up	1.86517e-14	8.53568e-14	-	GO:0016740//transferase activity	-	gi|238881647|gb|EEQ45285.1|/3.19865e-48/conserved hypothetical protein [Candida albicans WO-1]
orf19.2672	2043	1184	3755	62.2481	188.678	1.59983	Up	2.4969e-12	7.56494e-12	GO:0031090//organelle membrane;GO:0043231//intracellular membrane-bounded organelle;GO:0031224//intrinsic to membrane	GO:0046914//transition metal ion binding;GO:0016653//oxidoreductase activity, acting on NADH or NADPH, heme protein as acceptor;GO:0000166//nucleotide binding	GO:0008152//metabolic process	gi|68470836|ref|XP_720425.1|/0/hypothetical protein CaO19.2672 [Candida albicans SC5314]
orf19.1185	1110	1642	5194	158.889	480.351	1.59607	Up	9.99422e-13	3.23476e-12	-	GO:0046914//transition metal ion binding	-	gi|68487644|ref|XP_712303.1|/1.4831e-176/hypothetical protein CaO19.1185 [Candida albicans SC5314]
orf19.675.1	138	13	41	10.1183	30.4989	1.59179	Up	0.000220134	0.000373342	-	-	-	-
orf19.6219	1356	124	391	9.82211	29.6004	1.59151	Up	1.49214e-13	6.02572e-13	-	-	-	gi|68474198|ref|XP_718808.1|/0/hypothetical protein CaO19.6219 [Candida albicans SC5314]
orf19.5591	1044	360	1135	37.0378	111.603	1.59131	Up	4.72732e-13	1.66779e-12	-	GO:0019206//nucleoside kinase activity	GO:0043101//purine-containing compound salvage;GO:0006796//phosphate-containing compound metabolic process	gi|68473657|ref|XP_719153.1|/0/hypothetical protein CaO19.5591 [Candida albicans SC5314]
orf19.5634	1665	1663	5241	107.281	323.132	1.59074	Up	4.12204e-12	1.1871e-11	GO:0031224//intrinsic to membrane	GO:0046914//transition metal ion binding;GO:0003824//catalytic activity;GO:0050662//coenzyme binding	GO:0008152//metabolic process	gi|68485369|ref|XP_713362.1|/0/ferric reductase-like protein [Candida albicans SC5314]
orf19.5231.2	204	478	1506	251.675	757.835	1.59032	Up	9.31478e-13	3.03251e-12	-	-	-	gi|238878374|gb|EEQ42012.1|/2.60678e-18/conserved hypothetical protein [Candida albicans WO-1]
orf19.6282	2448	21	66	0.921405	2.76766	1.58676	Up	2.6001e-06	5.11981e-06	-	-	-	gi|68492025|ref|XP_710208.1|/0/hypothetical protein CaO19.3486 [Candida albicans SC5314]
orf19.5265	2715	193	606	7.63537	22.913	1.5854	Up	1.29674e-13	5.30319e-13	GO:0015630//microtubule cytoskeleton	GO:0003774//motor activity;GO:0032559	GO:0007017//microtubule-based process	gi|68479181|ref|XP_716396.1|/0/hypothetical protein CaO19.12730 [Candida albicans SC5314]
orf19.804	981	181	566	19.8177	59.2281	1.57949	Up	1.59206e-13	6.37032e-13	GO:0019866//organelle inner membrane;GO:0031224//intrinsic to membrane	-	GO:0006810//transport	gi|68469593|ref|XP_721048.1|/2.25903e-178/potential mitochondrial carrier protein [Candida albicans SC5314]
orf19.4798	2877	1011	3155	37.7445	112.574	1.57654	Up	1.81233e-12	5.58778e-12	-	GO:0004672//protein kinase activity	-	gi|74587971|sp|Q5APG7.1|EFR3_CANAL/0/RecName: Full=Protein EFR3
orf19.7523	1530	1057	3296	74.2038	221.144	1.57542	Up	3.81606e-12	1.10891e-11	-	GO:0004702//receptor signaling protein serine/threonine kinase activity;GO:0032559	GO:0006464//protein modification process	gi|68474614|ref|XP_718680.1|/0/likely protein kinase [Candida albicans SC5314]
orf19.4831	1542	1339	4162	93.2694	277.075	1.5708	Up	8.51986e-13	2.80358e-12	-	-	GO:0006629//lipid metabolic process	gi|68464879|ref|XP_723517.1|/0/potential cyclopropane-fatty-acyl-phospholipid synthase [Candida albicans SC5314]
orf19.6026	654	127	394	20.8578	61.8441	1.56805	Up	1.12355e-13	4.6794e-13	GO:0043231//intracellular membrane-bounded organelle	GO:0016863//intramolecular oxidoreductase activity, transposing C=C bonds	GO:0008204//ergosterol metabolic process	gi|238879419|gb|EEQ43057.1|/6.37508e-126/C-8 sterol isomerase [Candida albicans WO-1]
orf19.2066.1	195	685	2124	377.31	1118.15	1.56729	Up	6.19948e-13	2.11634e-12	GO:0033177//proton-transporting two-sector ATPase complex, proton-transporting domain	GO:0015077//monovalent inorganic cation transmembrane transporter activity;GO:0003824//catalytic activity	GO:0006754//ATP biosynthetic process	gi|241950627|ref|XP_002418036.1|/2.44655e-32/ATP synthase J chain, mitochondrial, putative; ATPase synthase I subunit, putative [Candida dubliniensis CD36]
orf19.4255	1242	166	514	14.3559	42.4836	1.56527	Up	2.29816e-13	8.78734e-13	-	-	-	gi|238882644|gb|EEQ46282.1|/1.28827e-179/conserved hypothetical protein [Candida albicans WO-1]
orf19.1392	2214	732	2264	35.5121	104.973	1.56364	Up	4.45422e-13	1.58424e-12	-	GO:0016862//intramolecular oxidoreductase activity, interconverting keto- and enol-groups	GO:0019725//cellular homeostasis	gi|68482864|ref|XP_714658.1|/0/potential thioredoxin-like ER retention protein [Candida albicans SC5314]
orf19.3325.3	264	207	640	84.2188	248.861	1.56312	Up	1.66755e-13	6.65932e-13	GO:0015935//small ribosomal subunit	GO:0005198//structural molecule activity	GO:0006412//translation;GO:0000462//maturation of SSU-rRNA from tricistronic rRNA transcript (SSU-rRNA, 5.8S rRNA, LSU-rRNA)	gi|15214291|sp|Q9P844.1|RS21_CANAL/4.0992e-43/RecName: Full=40S ribosomal protein S21
orf19.3663	2583	1298	4010	53.9751	159.368	1.56199	Up	2.49268e-12	7.55965e-12	GO:0044464//cell part	-	GO:0030001//metal ion transport	gi|68484595|ref|XP_713757.1|/0/hypothetical protein CaO19.3663 [Candida albicans SC5314]
orf19.3087	582	2247	6924	414.689	1221.28	1.55829	Up	0	0	GO:0030529//ribonucleoprotein complex	GO:0005198//structural molecule activity	GO:0010467//gene expression	gi|68481104|ref|XP_715467.1|/1.5633e-79/ubiquitin-ribosomal protein fusion S27a [Candida albicans SC5314]
orf19.6838	810	186	573	24.6644	72.6189	1.55791	Up	6.58584e-13	2.23079e-12	-	GO:0004312//fatty acid synthase activity;GO:0008875	GO:0008152//metabolic process	gi|68487770|ref|XP_712226.1|/9.46304e-142/hypothetical protein CaO19.6838 [Candida albicans SC5314]
orf19.1631	1131	445	1370	42.261	124.348	1.55698	Up	1.19682e-13	4.94082e-13	-	GO:0008169//C-methyltransferase activity	GO:0006694//steroid biosynthetic process;GO:0006730//one-carbon metabolic process	gi|6015114|sp|O74198.1|ERG6_CANAL/0/RecName: Full=Sterol 24-C-methyltransferase; AltName: Full=Delta(24)-sterol C-methyltransferase
orf19.4841	1080	331	1018	32.919	96.7618	1.55552	Up	0	0	-	-	-	gi|68464899|ref|XP_723527.1|/0/hypothetical protein CaO19.4841 [Candida albicans SC5314]
orf19.3142	1200	75	230	6.7131	19.6755	1.55135	Up	0	0	-	-	-	gi|68481212|ref|XP_715521.1|/0/hypothetical protein CaO19.10654 [Candida albicans SC5314]
orf19.6178	996	447	1365	48.2049	140.687	1.54524	Up	9.1993e-13	3.00612e-12	GO:0044424//intracellular part	GO:0019203//carbohydrate phosphatase activity	GO:0005975//carbohydrate metabolic process	gi|238881157|gb|EEQ44795.1|/0/fructose-1,6-bisphosphatase [Candida albicans WO-1]
orf19.6830	798	101	308	13.5944	39.6212	1.54326	Up	0	0	-	GO:0003824//catalytic activity	-	gi|68472253|ref|XP_719922.1|/1.73576e-140/potential enoyl-CoA hydratase/isomerase [Candida albicans SC5314]
orf19.247	732	22	67	3.22816	9.39602	1.54134	Up	3.52996e-06	6.88866e-06	-	-	-	gi|68471806|ref|XP_719946.1|/2.7481e-86/hypothetical protein CaO19.247 [Candida albicans SC5314]
orf19.1930	2133	164	499	8.2584	24.0154	1.54003	Up	1.68088e-13	6.70378e-13	GO:0031224//intrinsic to membrane	GO:0016723//oxidoreductase activity, oxidizing metal ions, NAD or NADP as acceptor;GO:0046914//transition metal ion binding;GO:0050662//coenzyme binding	GO:0008152//metabolic process	gi|68480617|ref|XP_715694.1|/0/likely ferric reductase [Candida albicans SC5314]
orf19.2459	2919	641	1949	23.5867	68.5422	1.53902	Up	6.18394e-13	2.11339e-12	-	-	-	gi|68474715|ref|XP_718565.1|/0/hypothetical protein CaO19.9996 [Candida albicans SC5314]
orf19.6785	432	240	727	59.672	172.755	1.5336	Up	0	0	GO:0030529//ribonucleoprotein complex	GO:0005198//structural molecule activity	GO:0010467//gene expression	gi|68472171|ref|XP_719881.1|/6.403e-65/likely cytosolic ribosomal protein S12 [Candida albicans SC5314]
orf19.6854	1641	11690	35348	765.154	2211.24	1.53104	Up	1.34543e-11	3.55181e-11	GO:0043231//intracellular membrane-bounded organelle;GO:0019866//organelle inner membrane;GO:0033178//proton-transporting two-sector ATPase complex, catalytic domain	GO:0015078//hydrogen ion transmembrane transporter activity;GO:0019829//cation-transporting ATPase activity;GO:0032559	GO:0015986//ATP synthesis coupled proton transport;GO:0015988//energy coupled proton transport, against electrochemical gradient	gi|241948767|ref|XP_002417106.1|/0/ATP alpha synthase chain, mitochondrial precursor, putative [Candida dubliniensis CD36]
orf19.4991	2817	341	1030	13.002	37.5345	1.52948	Up	4.00124e-13	1.44158e-12	-	GO:0003676//nucleic acid binding	-	gi|68467297|ref|XP_722310.1|/0/hypothetical protein CaO19.12458 [Candida albicans SC5314]
orf19.4505	849	141	423	17.8383	51.1461	1.51964	Up	2.0206e-14	9.21936e-14	-	GO:0016616//oxidoreductase activity, acting on the CH-OH group of donors, NAD or NADP as acceptor;GO:0046914//transition metal ion binding	GO:0008152//metabolic process	gi|68486457|ref|XP_712899.1|/5.75686e-161/potential secondary alcohol dehydrogenase [Candida albicans SC5314]
orf19.3711	2190	31	93	1.52041	4.35932	1.51964	Up	5.99724e-08	1.30025e-07	-	GO:0016709//oxidoreductase activity, acting on paired donors, with incorporation or reduction of molecular oxygen, NADH or NADPH as one donor, and incorporation of one atom of oxygen	GO:0008152//metabolic process	gi|68490231|ref|XP_711064.1|/0/hypothetical protein CaO19.11196 [Candida albicans SC5314]
orf19.787	306	39	117	13.6894	39.2504	1.51964	Up	1.16471e-09	2.75476e-09	-	-	-	gi|68469563|ref|XP_721033.1|/5.97305e-10/hypothetical protein CaO19.8406 [Candida albicans SC5314]
orf19.7231	1149	66	198	6.16974	17.6899	1.51964	Up	0	0	GO:0044464//cell part	-	GO:0006810//transport	gi|68482027|ref|XP_715031.1|/0/hypothetical protein CaO19.7231 [Candida albicans SC5314]
orf19.979	6114	6128	18359	107.655	308.25	1.51768	Up	4.78994e-12	1.35019e-11	GO:0043234//protein complex	-	GO:0006631//fatty acid metabolic process	gi|68478271|ref|XP_716877.1|/0/fatty acid synthetase beta subunit [Candida albicans SC5314]
orf19.6277	3360	139	416	4.44343	12.7097	1.51618	Up	2.13384e-13	8.2311e-13	-	-	-	gi|238878925|gb|EEQ42563.1|/0/conserved hypothetical protein [Candida albicans WO-1]
orf19.5949	5655	5155	15414	97.9127	279.81	1.51488	Up	3.01516e-11	7.64925e-11	GO:0044424//intracellular part	GO:0046872//metal ion binding;GO:0016408;GO:0016780//phosphotransferase activity, for other substituted phosphate groups	GO:0009058//biosynthetic process;GO:0006631//fatty acid metabolic process	gi|1169645|sp|P43098.1|FAS2_CANAL/0/RecName: Full=Fatty acid synthase subunit alpha; Includes: RecName: Full=Acyl carrier; Includes: RecName: Full=3-oxoacyl-[acyl-carrier-protein] reductase; AltName: Full=Beta-ketoacyl reductase; Includes: RecName: Full=3-oxoacyl-[acyl-carrier-protein] synthase; AltName: Full=Beta-ketoacyl synthase
orf19.1075.1	153	103	307	72.3084	205.981	1.51028	Up	0	0	-	-	-	gi|255727088|ref|XP_002548470.1|/8.96801e-19/predicted protein [Candida tropicalis MYA-3404]
orf19.1397	711	97	289	14.6536	41.7262	1.50969	Up	7.68274e-14	3.29399e-13	GO:0016020//membrane	GO:0005506//iron ion binding	GO:0008152//metabolic process	gi|68482874|ref|XP_714663.1|/5.10121e-90/cytochrome b5-like protein [Candida albicans SC5314]
orf19.6007	1062	332	988	33.5781	95.502	1.50801	Up	0	0	GO:0031224//intrinsic to membrane	-	-	gi|68465707|ref|XP_723215.1|/0/potential fatty acid elongase [Candida albicans SC5314]
orf19.3579	702	1925	5717	294.535	836.009	1.50508	Up	3.33378e-12	9.84198e-12	GO:0005753//mitochondrial proton-transporting ATP synthase complex	GO:0015077//monovalent inorganic cation transmembrane transporter activity;GO:0003824//catalytic activity	GO:0006754//ATP biosynthetic process	gi|68482234|ref|XP_715001.1|/2.36613e-116/hypothetical protein CaO19.11063 [Candida albicans SC5314]
orf19.6176	1440	4223	12519	314.993	892.457	1.50246	Up	1.94509e-11	5.03057e-11	GO:0031090//organelle membrane;GO:0043231//intracellular membrane-bounded organelle;GO:0031224//intrinsic to membrane	GO:0008320//protein transmembrane transporter activity	GO:0006810//transport	gi|7710957|emb|CAB90210.1|/0/SEC61 protein [Candida albicans]
orf19.5518	741	250	741	36.238	102.655	1.50223	Up	3.71924e-13	1.36164e-12	-	-	-	gi|68473517|ref|XP_719083.1|/1.632e-126/hypothetical protein CaO19.5518 [Candida albicans SC5314]
orf19.6202	1077	105	311	10.4717	29.6432	1.50121	Up	0	0	-	-	-	gi|68474166|ref|XP_718792.1|/5.4577e-152/hypothetical protein CaO19.6202 [Candida albicans SC5314]
orf19.7163	408	51	151	13.4262	37.9924	1.50066	Up	7.08722e-12	1.92412e-11	-	-	-	gi|68481688|ref|XP_715212.1|/3.961e-75/hypothetical protein CaO19.7163 [Candida albicans SC5314]
orf19.1499	3435	893	2628	27.9234	78.5378	1.49192	Up	0	0	GO:0043231//intracellular membrane-bounded organelle	GO:0046914//transition metal ion binding;GO:0003676//nucleic acid binding;GO:0001071//nucleic acid binding transcription factor activity;GO:0016740//transferase activity	GO:0006351//transcription, DNA-dependent	gi|68466701|ref|XP_722546.1|/0/potential fungal zinc cluster transcription factor [Candida albicans SC5314]
orf19.6072	1344	155	456	12.3873	34.8294	1.49145	Up	3.9746e-13	1.43536e-12	-	-	-	gi|68473862|ref|XP_719034.1|/0/hypothetical protein CaO19.6072 [Candida albicans SC5314]
orf19.4433	1971	128	376	6.97535	19.5831	1.48927	Up	5.4401e-14	2.39458e-13	-	-	GO:0006351//transcription, DNA-dependent	gi|619642|gb|AAA59355.1|/0/acid proteinase-related protein [Candida albicans]
orf19.7409.1	213	30	88	15.1281	42.4115	1.48722	Up	2.14464e-07	4.49823e-07	GO:0030529//ribonucleoprotein complex	GO:0005198//structural molecule activity	GO:0010467//gene expression	gi|241953609|ref|XP_002419526.1|/3.49698e-34/mitochondrial ribosomal protein, large subunit, putative [Candida dubliniensis CD36]
orf19.4311	456	1169	3429	275.355	771.939	1.48719	Up	2.53686e-12	7.6746e-12	GO:0044424//intracellular part	GO:0043169//cation binding;GO:0016776//phosphotransferase activity, phosphate group as acceptor;GO:0032559	GO:0009209//pyrimidine ribonucleoside triphosphate biosynthetic process;GO:0006796//phosphate-containing compound metabolic process;GO:0009206;GO:0009132//nucleoside diphosphate metabolic process	gi|238882685|gb|EEQ46323.1|/9.85237e-83/nucleoside diphosphate kinase [Candida albicans WO-1]
orf19.5292	2802	615	1801	23.5749	65.982	1.48482	Up	3.39062e-13	1.2625e-12	-	-	-	gi|68477567|ref|XP_717096.1|/0/potential bud site selection protein [Candida albicans SC5314]
orf19.4341	1449	65	190	4.81823	13.4606	1.48217	Up	0	0	-	-	-	gi|68470538|ref|XP_720773.1|/0/potential GPI-protein transamidase complex subunit [Candida albicans SC5314]
orf19.6941	1734	972	2841	60.2088	168.191	1.48205	Up	2.54264e-12	7.68828e-12	-	GO:0016746//transferase activity, transferring acyl groups	-	gi|68486776|ref|XP_712742.1|/0/hypothetical protein CaO19.6941 [Candida albicans SC5314]
orf19.899	849	710	2068	89.8242	250.048	1.47703	Up	6.69686e-13	2.26714e-12	-	-	-	gi|68469779|ref|XP_721141.1|/6.4094e-136/hypothetical protein CaO19.8518 [Candida albicans SC5314]
orf19.3642	1257	2763	8037	236.096	656.355	1.4751	Up	0	0	-	-	-	gi|68489582|ref|XP_711361.1|/0/SUN family beta-glucosidase-like protein [Candida albicans SC5314]
orf19.1562	543	346	1005	68.4414	189.997	1.47303	Up	3.2907e-13	1.23054e-12	-	-	-	gi|68466817|ref|XP_722604.1|/4.87056e-58/hypothetical protein CaO19.1562 [Candida albicans SC5314]
orf19.1224	858	1234	3583	154.479	428.686	1.47251	Up	5.94614e-12	1.64056e-11	GO:0044464//cell part	-	-	gi|68491834|ref|XP_710295.1|/1.35866e-141/possible transmembrane sensor/transporter [Candida albicans SC5314]
orf19.328	1983	172	498	9.31641	25.7802	1.46842	Up	1.3145e-13	5.36866e-13	-	-	-	gi|68471697|ref|XP_720155.1|/0/hypothetical protein CaO19.7960 [Candida albicans SC5314]
orf19.5986	1065	35916	103794	3622.27	10004.7	1.46571	Up	2.1557e-10	5.26777e-10	-	-	GO:0006772//thiamine metabolic process	gi|68465671|ref|XP_723197.1|/0/likely thiamine biosynthesis enzyme [Candida albicans SC5314]
orf19.2013	2064	5619	16196	292.41	805.523	1.46193	Up	1.62035e-11	4.24093e-11	GO:0044432//endoplasmic reticulum part	GO:0032559	GO:0006950//response to stress	gi|68472794|ref|XP_719462.1|/0/likely HSP70/BiP chaperone [Candida albicans SC5314]
orf19.2298	1314	877	2526	71.6881	197.341	1.46089	Up	0	0	GO:0031090//organelle membrane	GO:0004576//oligosaccharyl transferase activity	GO:0006487//protein N-linked glycosylation	gi|68484138|ref|XP_713961.1|/0/hypothetical protein CaO19.9834 [Candida albicans SC5314]
orf19.7448	1335	838	2413	67.4226	185.548	1.46049	Up	0	0	-	GO:0004753//saccharopine dehydrogenase activity	GO:0008152//metabolic process	gi|68479882|ref|XP_716109.1|/0/hypothetical protein CaO19.7448 [Candida albicans SC5314]
orf19.6996	2058	89	256	4.64502	12.7695	1.45895	Up	0	0	-	GO:0016740//transferase activity	GO:0006464//protein modification process	gi|68482785|ref|XP_714702.1|/0/hypothetical protein CaO19.6996 [Candida albicans SC5314]
orf19.5190	426	129	371	32.5254	89.4014	1.45873	Up	0	0	-	-	-	gi|68491504|ref|XP_710451.1|/3.90772e-62/hypothetical protein CaO19.4486 [Candida albicans SC5314]
orf19.3363	2130	2195	6304	110.687	303.82	1.45673	Up	0	0	-	-	-	gi|238881520|gb|EEQ45158.1|/0/vacuolar transporter chaperone 4 [Candida albicans WO-1]
orf19.1344	669	39	112	6.26154	17.1859	1.45663	Up	7.99472e-09	1.82183e-08	-	-	-	gi|238883467|gb|EEQ47105.1|/5.66746e-85/conserved hypothetical protein [Candida albicans WO-1]
orf19.3769	2064	360	1033	18.7342	51.3772	1.45545	Up	4.72732e-13	1.66875e-12	GO:0031224//intrinsic to membrane	GO:0015075//ion transmembrane transporter activity	GO:0006811//ion transport	gi|68477406|ref|XP_717174.1|/0/potential zinc-regulated gene [Candida albicans SC5314]
orf19.7391	1158	532	1526	49.3453	135.278	1.45494	Up	1.17462e-13	4.87219e-13	-	GO:0000009//alpha-1,6-mannosyltransferase activity	-	gi|68478727|ref|XP_716632.1|/0/mannosyltransferase Och1p [Candida albicans SC5314]
orf19.4336	678	2444	7010	387.181	1061.37	1.45485	Up	0	0	GO:0030529//ribonucleoprotein complex	GO:0003676//nucleic acid binding;GO:0005198//structural molecule activity	GO:0010467//gene expression	gi|68470530|ref|XP_720769.1|/3.51591e-106/likely cytosolic ribosomal protein S5 [Candida albicans SC5314]
orf19.3214	1485	50	143	3.61648	9.8853	1.4507	Up	7.78078e-11	1.93775e-10	-	-	-	gi|238882778|gb|EEQ46416.1|/0/conserved hypothetical protein [Candida albicans WO-1]
orf19.5491.1	327	2306	6585	757.451	2067.23	1.44847	Up	0	0	-	GO:0003824//catalytic activity	-	gi|238882391|gb|EEQ46029.1|/4.29678e-45/predicted protein [Candida albicans WO-1]
orf19.681	1905	2094	5978	118.066	322.137	1.44808	Up	0	0	-	GO:0003677//DNA binding	GO:0006351//transcription, DNA-dependent	gi|68484566|ref|XP_713814.1|/0/hypothetical protein CaO19.681 [Candida albicans SC5314]
orf19.5015	4686	1014	2892	23.2423	63.3543	1.44669	Up	2.79e-12	8.36179e-12	GO:0015629//actin cytoskeleton	GO:0003779//actin binding;GO:0017111//nucleoside-triphosphatase activity;GO:0032559	GO:0006810//transport	gi|68467343|ref|XP_722333.1|/0/hypothetical protein CaO19.12482 [Candida albicans SC5314]
orf19.4064	2658	196	556	7.92034	21.4734	1.43891	Up	1.77414e-13	7.03898e-13	GO:0016020//membrane	-	-	gi|110808527|sp|Q8TGB2.2|GPI7_CANAL/0/RecName: Full=GPI ethanolamine phosphate transferase 2; AltName: Full=Glycosylphosphatidylinositol-anchor biosynthesis protein 7
orf19.4585	1827	1671	4738	98.2383	266.218	1.43825	Up	0	0	GO:0043231//intracellular membrane-bounded organelle	GO:0008135//translation factor activity, nucleic acid binding	GO:0006352//transcription initiation, DNA-dependent;GO:0006412//translation	gi|68466055|ref|XP_722802.1|/0/hypothetical protein CaO19.12054 [Candida albicans SC5314]
orf19.641	903	121	343	14.3926	38.993	1.43788	Up	3.68594e-14	1.63897e-13	-	GO:0005515//protein binding	-	gi|68488263|ref|XP_712007.1|/1.92634e-165/possible ER co-chaperone [Candida albicans SC5314]
orf19.3810	972	308	872	34.0351	92.0938	1.43608	Up	0	0	-	-	GO:0006760//folic acid-containing compound metabolic process	gi|68477329|ref|XP_717291.1|/9.6751e-174/hypothetical protein CaO19.11291 [Candida albicans SC5314]
orf19.5384	3318	1271	3598	41.1445	111.318	1.43591	Up	5.12368e-12	1.43304e-11	-	GO:0008375//acetylglucosaminyltransferase activity	GO:0006023	gi|68476221|ref|XP_717760.1|/0/chitin synthase Chs3p [Candida albicans SC5314]
orf19.6445	918	604	1709	70.6703	191.108	1.43521	Up	7.12764e-13	2.39837e-12	-	GO:0016863//intramolecular oxidoreductase activity, transposing C=C bonds	-	gi|68479501|ref|XP_716282.1|/5.7011e-173/potential enoyl-CoA hydratase/isomerase [Candida albicans SC5314]
orf19.5341	789	1423	4022	193.718	523.293	1.43366	Up	4.44622e-12	1.26615e-11	GO:0030529//ribonucleoprotein complex	GO:0003676//nucleic acid binding;GO:0005198//structural molecule activity	GO:0010467//gene expression	gi|68477663|ref|XP_717144.1|/2.07699e-138/likely cytosolic ribosomal protein S4 [Candida albicans SC5314]
orf19.1340	930	167	470	19.2875	51.8794	1.42749	Up	2.08278e-13	8.05447e-13	-	GO:0003824//catalytic activity	GO:0008152//metabolic process	gi|68488974|ref|XP_711680.1|/1.13736e-168/hypothetical protein CaO19.1340 [Candida albicans SC5314]
orf19.1600	2130	873	2455	44.0228	118.318	1.42635	Up	3.55938e-13	1.31097e-12	-	GO:0003676//nucleic acid binding	-	gi|68491018|ref|XP_710681.1|/0/hypothetical protein CaO19.1600 [Candida albicans SC5314]
orf19.1635	498	4511	12675	972.941	2612.76	1.42515	Up	1.67788e-11	4.38587e-11	GO:0030529//ribonucleoprotein complex	GO:0005198//structural molecule activity	GO:0010467//gene expression	gi|68468305|ref|XP_721712.1|/4.60199e-88/likely cytosolic ribosomal protein L12 [Candida albicans SC5314]
orf19.1782	720	83	232	12.3819	33.0777	1.41762	Up	1.48548e-13	6.00675e-13	GO:0044464//cell part	-	-	gi|74589789|sp|Q59XW9.1|IR222_CANAL/2.1587e-112/RecName: Full=Increased recombination centers protein 22-2; Flags: Precursor
orf19.1702	528	105	293	21.3598	56.9657	1.41519	Up	0	0	GO:0044464//cell part	GO:0032561//guanyl ribonucleotide binding	GO:0035556//intracellular signal transduction	gi|241952725|ref|XP_002419084.1|/3.51193e-95/ADP-ribosylation factor, putative [Candida dubliniensis CD36]
orf19.6385	2334	4243	11825	195.261	520.092	1.41337	Up	1.11102e-11	2.95467e-11	-	GO:0051536//iron-sulfur cluster binding;GO:0016836//hydro-lyase activity	GO:0009060//aerobic respiration	gi|68479387|ref|XP_716225.1|/0/likely mitochondrial aconitate hydratase [Candida albicans SC5314]
orf19.134	411	244	680	63.7662	169.843	1.41334	Up	3.9213e-13	1.42199e-12	-	-	-	gi|68483559|ref|XP_714340.1|/1.3574e-75/hypothetical protein CaO19.134 [Candida albicans SC5314]
orf19.2871	1926	842	2346	46.9568	125.041	1.41299	Up	0	0	-	GO:0000104//succinate dehydrogenase activity;GO:0050662//coenzyme binding	GO:0009060//aerobic respiration	gi|238881234|gb|EEQ44872.1|/0/succinate dehydrogenase flavoprotein subunit, mitochondrial precursor [Candida albicans WO-1]
orf19.6073	876	1673	4658	205.133	545.853	1.41196	Up	3.69282e-12	1.07873e-11	-	GO:0016705//oxidoreductase activity, acting on paired donors, with incorporation or reduction of molecular oxygen;GO:0016209//antioxidant activity	GO:0055114//oxidation-reduction process	gi|68473864|ref|XP_719035.1|/5.87994e-164/heme oxygenase [Candida albicans SC5314]
orf19.6415.1	171	82	228	51.5063	136.873	1.41002	Up	0	0	GO:0030529//ribonucleoprotein complex	GO:0043169//cation binding;GO:0005198//structural molecule activity	GO:0010467//gene expression	gi|255727721|ref|XP_002548786.1|/5.75069e-29/40S ribosomal protein S29-A [Candida tropicalis MYA-3404]
orf19.437	1959	3494	9712	191.572	508.926	1.40957	Up	0	0	GO:0044424//intracellular part	GO:0004812//aminoacyl-tRNA ligase activity;GO:0032559	GO:0006418//tRNA aminoacylation for protein translation	gi|68480224|ref|XP_715922.1|/0/hypothetical protein CaO19.8067 [Candida albicans SC5314]
orf19.6869	1050	226	628	23.1186	61.3975	1.40912	Up	1.48326e-13	6.00572e-13	-	GO:0003824//catalytic activity;GO:0046914//transition metal ion binding	GO:0008152//metabolic process	gi|68486553|ref|XP_712827.1|/0/hypothetical protein CaO19.14158 [Candida albicans SC5314]
orf19.2936	471	128	355	29.1899	77.3727	1.40636	Up	5.4401e-14	2.39631e-13	-	-	-	gi|68468753|ref|XP_721435.1|/5.95772e-68/hypothetical protein CaO19.2936 [Candida albicans SC5314]
orf19.6322	846	6208	17216	788.178	2089.02	1.40623	Up	2.62526e-11	6.69343e-11	-	GO:0016616//oxidoreductase activity, acting on the CH-OH group of donors, NAD or NADP as acceptor	GO:0044238//primary metabolic process	gi|68491391|ref|XP_710493.1|/5.72043e-161/hypothetical protein CaO19.6322 [Candida albicans SC5314]
orf19.1607	2790	1235	3423	47.5451	125.946	1.40543	Up	6.90692e-12	1.87684e-11	-	-	-	gi|68468253|ref|XP_721686.1|/0/hypothetical protein CaO19.1607 [Candida albicans SC5314]
orf19.4589	1434	39	108	2.92118	7.73134	1.40417	Up	3.59188e-08	7.87124e-08	-	-	-	gi|68466063|ref|XP_722806.1|/0/likely Flavin containing amine oxidoreductase [Candida albicans SC5314]
orf19.3740	849	26	72	3.28934	8.70572	1.40417	Up	7.18496e-06	1.37321e-05	-	-	-	gi|238879700|gb|EEQ43338.1|/1.58322e-09/predicted protein [Candida albicans WO-1]
orf19.5614	858	615	1703	76.9893	203.755	1.4041	Up	3.39062e-13	1.26173e-12	-	GO:0046872//metal ion binding;GO:0016891//endoribonuclease activity, producing 5'-phosphomonoesters	-	gi|68473699|ref|XP_719174.1|/1.01229e-120/hypothetical protein CaO19.5614 [Candida albicans SC5314]
orf19.4649	3591	521	1440	15.5835	41.1649	1.4014	Up	0	0	-	GO:0005488//binding	-	gi|68466181|ref|XP_722865.1|/0/potential fungal zinc cluster transcription factor [Candida albicans SC5314]
orf19.667.1	273	2079	5739	817.965	2158.01	1.39959	Up	0	0	GO:0030529//ribonucleoprotein complex	GO:0043169//cation binding;GO:0003723//RNA binding;GO:0005198//structural molecule activity	GO:0010467//gene expression	gi|238878464|gb|EEQ42102.1|/1.44667e-40/hypothetical protein CAWG_00300 [Candida albicans WO-1]
orf19.3334	750	2224	6133	318.505	839.444	1.39812	Up	0	0	GO:0030529//ribonucleoprotein complex	GO:0003676//nucleic acid binding;GO:0005198//structural molecule activity	GO:0010467//gene expression	gi|68475083|ref|XP_718427.1|/7.05518e-109/likely cytosolic ribosomal protein S2 [Candida albicans SC5314]
orf19.2848	2286	506	1392	23.7748	62.5091	1.39463	Up	5.13812e-13	1.79922e-12	-	-	-	gi|73622231|sp|Q5A1Z5.1|ATG13_CANAL/0/RecName: Full=Autophagy-related protein 13
orf19.1414	906	995	2737	117.961	310.118	1.39451	Up	2.05614e-13	7.98681e-13	-	-	-	gi|238881427|gb|EEQ45065.1|/1.09556e-59/conserved hypothetical protein [Candida albicans WO-1]
orf19.2529	618	48	132	8.34249	21.9263	1.39411	Up	1.3316e-09	3.14219e-09	-	GO:0008375//acetylglucosaminyltransferase activity	-	gi|68475156|ref|XP_718296.1|/3.57594e-104/hypothetical protein CaO19.10064 [Candida albicans SC5314]
orf19.7301	1761	40	110	2.43974	6.41229	1.39411	Up	3.18482e-08	7.00936e-08	-	-	-	gi|68492036|ref|XP_710204.1|/0/possible intact version of Cirt1 transposase [Candida albicans SC5314]
orf19.1860	1248	4302	11824	370.253	972.59	1.39332	Up	1.35307e-11	3.57043e-11	-	GO:0004774//succinate-CoA ligase activity;GO:0032559	GO:0009060//aerobic respiration	gi|238880090|gb|EEQ43728.1|/0/succinyl-CoA ligase beta-chain, mitochondrial precursor [Candida albicans WO-1]
orf19.7446	678	98	269	15.5253	40.7289	1.39143	Up	1.39888e-14	6.45005e-14	-	GO:0008757//S-adenosylmethionine-dependent methyltransferase activity	GO:0006730//one-carbon metabolic process;GO:0019637//organophosphate metabolic process	gi|238881052|gb|EEQ44690.1|/6.16313e-127/methylene-fatty-acyl-phospholipid synthase [Candida albicans WO-1]
orf19.7509.1	309	1506	4132	523.491	1372.72	1.3908	Up	3.92464e-12	1.13722e-11	-	GO:0003824//catalytic activity	-	gi|238879522|gb|EEQ43160.1|/1.95569e-53/ATP synthase f chain, mitochondrial precursor [Candida albicans WO-1]
orf19.5653	1515	24708	67786	1751.73	4593.12	1.39069	Up	2.85028e-11	7.23697e-11	GO:0043231//intracellular membrane-bounded organelle;GO:0019866//organelle inner membrane;GO:0033178//proton-transporting two-sector ATPase complex, catalytic domain	GO:0015078//hydrogen ion transmembrane transporter activity;GO:0015662//ATPase activity, coupled to transmembrane movement of ions, phosphorylative mechanism;GO:0019829//cation-transporting ATPase activity;GO:0032559	GO:0015986//ATP synthesis coupled proton transport;GO:0015988//energy coupled proton transport, against electrochemical gradient	gi|241953968|ref|XP_002419705.1|/0/ATP synthase subunit beta, mitochondrial precursor, putative; F1F0 ATP synthase beta subunit, putative [Candida dubliniensis CD36]
orf19.5110	1584	490	1344	33.2264	87.1012	1.39036	Up	0	0	-	-	-	gi|3859716|emb|CAA21990.1|/0/conserved hypothetical protein [Candida albicans]
orf19.2303	702	58	159	8.87429	23.2509	1.38958	Up	3.07834e-11	7.80306e-11	-	-	-	gi|68484148|ref|XP_713966.1|/4.46233e-115/potential spliceosomal U4/U6.U5 tri-snRNP factor PRP38 [Candida albicans SC5314]
orf19.2891	1632	88	241	5.79169	15.1592	1.38814	Up	2.9754e-14	1.33762e-13	-	GO:0032559	-	gi|68480900|ref|XP_715603.1|/0/potential mitochondrial ATPase [Candida albicans SC5314]
orf19.6541	897	3321	9094	397.667	1040.74	1.38798	Up	0	0	GO:0030529//ribonucleoprotein complex	GO:0019843//rRNA binding;GO:0005198//structural molecule activity	GO:0010467//gene expression	gi|68469184|ref|XP_721379.1|/1.01924e-134/likely cytosolic ribosomal protein L5 [Candida albicans SC5314]
orf19.2250	894	825	2253	99.1195	258.704	1.38406	Up	0	0	-	GO:0016765//transferase activity, transferring alkyl or aryl (other than methyl) groups	GO:0006596//polyamine biosynthetic process	gi|238883593|gb|EEQ47231.1|/4.97137e-174/spermidine synthase [Candida albicans WO-1]
orf19.5250	489	444	1212	97.5252	254.433	1.38344	Up	1.20082e-12	3.80601e-12	-	-	-	gi|68479151|ref|XP_716381.1|/2.59567e-88/hypothetical protein CaO19.12715 [Candida albicans SC5314]
orf19.5563	702	184	502	28.1529	73.4086	1.38266	Up	3.39062e-13	1.26327e-12	-	GO:0016891//endoribonuclease activity, producing 5'-phosphomonoesters;GO:0005488//binding	-	gi|68473368|ref|XP_719242.1|/8.66847e-127/hypothetical protein CaO19.13009 [Candida albicans SC5314]
orf19.1341	957	55	150	6.17296	16.0901	1.38214	Up	1.32188e-10	3.25755e-10	-	GO:0004672//protein kinase activity;GO:0032559	GO:0006464//protein modification process	gi|68488976|ref|XP_711681.1|/0/likely protein kinase [Candida albicans SC5314]
orf19.2310.1	192	742	2022	415.093	1081.09	1.38097	Up	4.6163e-13	1.63523e-12	GO:0030529//ribonucleoprotein complex	GO:0005198//structural molecule activity	GO:0010467//gene expression	gi|238878494|gb|EEQ42132.1|/3.91554e-30/60S ribosomal protein L29 [Candida albicans WO-1]
orf19.1847	1890	3303	9000	187.711	488.833	1.38083	Up	0	0	-	GO:0019842//vitamin binding;GO:0046872//metal ion binding;GO:0016830//carbon-carbon lyase activity	-	gi|68490192|ref|XP_711076.1|/0/hypothetical protein CaO19.1847 [Candida albicans SC5314]
orf19.5754	1851	727	1979	42.1862	109.754	1.37943	Up	1.95532e-12	6.01351e-12	GO:0031224//intrinsic to membrane	GO:0004871//signal transducer activity	-	gi|68475767|ref|XP_718090.1|/0/potential haemolysin-related integral membrane protein [Candida albicans SC5314]
orf19.2309.2	765	3612	9805	507.141	1315.73	1.3754	Up	0	0	GO:0030529//ribonucleoprotein complex	GO:0003723//RNA binding;GO:0005198//structural molecule activity	GO:0010467//gene expression	gi|241949915|ref|XP_002417680.1|/1.73326e-134/60S ribosomal protein L2, putative [Candida dubliniensis CD36]
orf19.1606	1626	62	168	4.09557	10.6064	1.3728	Up	1.30345e-11	3.44692e-11	-	-	-	gi|68468251|ref|XP_721685.1|/4.02994e-134/hypothetical protein CaO19.1606 [Candida albicans SC5314]
orf19.3911	1353	2842	7690	225.616	583.457	1.37076	Up	0	0	GO:0044424//intracellular part	GO:0016802	GO:0044237//cellular metabolic process	gi|229462755|sp|P83783.2|SAHH_CANAL/0/RecName: Full=Adenosylhomocysteinase; Short=AdoHcyase; AltName: Full=S-adenosyl-L-homocysteine hydrolase
orf19.7426	1023	78	211	8.18958	21.1732	1.37038	Up	0	0	-	GO:0003824//catalytic activity	-	gi|68479843|ref|XP_716090.1|/2.57355e-164/hypothetical protein CaO19.7426 [Candida albicans SC5314]
orf19.4411	1311	73	197	5.98085	15.4257	1.36691	Up	1.59206e-13	6.3745e-13	-	-	-	gi|68488567|ref|XP_711859.1|/0/likely histone deacetylase Hos1p [Candida albicans SC5314]
orf19.305	1251	116	313	9.95964	25.6843	1.36672	Up	1.18794e-13	4.91411e-13	-	-	-	gi|68471651|ref|XP_720132.1|/0/hypothetical protein CaO19.7937 [Candida albicans SC5314]
orf19.2474	1653	1296	3487	84.2122	216.55	1.3626	Up	4.48242e-12	1.27468e-11	-	GO:0004180//carboxypeptidase activity	GO:0019538//protein metabolic process	gi|68474908|ref|XP_718495.1|/0/potential serine carboxypeptidase [Candida albicans SC5314]
orf19.3848	1293	200	538	16.614	42.7134	1.36229	Up	0	0	-	-	-	gi|68485140|ref|XP_713479.1|/0/hypothetical protein CaO19.3848 [Candida albicans SC5314]
orf19.2179.2	357	2159	5807	649.572	1669.8	1.36211	Up	0	0	GO:0030529//ribonucleoprotein complex	-	-	gi|238883690|gb|EEQ47328.1|/6.45722e-49/conserved hypothetical protein [Candida albicans WO-1]
orf19.1793	1788	190	511	11.4138	29.3382	1.36201	Up	3.09974e-13	1.16555e-12	GO:0016020//membrane;GO:0043231//intracellular membrane-bounded organelle	-	-	gi|73621024|sp|Q59P11.1|HSV2_CANAL/0/RecName: Full=SVP1-like protein 2
orf19.2771	3426	761	2045	23.8583	61.2754	1.36081	Up	2.08722e-13	8.06654e-13	GO:0044464//cell part	GO:0008047//enzyme activator activity;GO:0005543//phospholipid binding	GO:0023052//signaling;GO:0009987//cellular process	gi|68471028|ref|XP_720521.1|/0/hypothetical protein CaO19.2771 [Candida albicans SC5314]
orf19.3438	1155	179	481	16.6462	42.7507	1.36076	Up	0	0	-	GO:0005515//protein binding;GO:0043169//cation binding	GO:0044267//cellular protein metabolic process	gi|68478487|ref|XP_716745.1|/0/potential DnaJ-like co-chaperone Scj1p [Candida albicans SC5314]
orf19.2633	1779	163	438	9.84135	25.2742	1.36074	Up	2.55574e-13	9.70546e-13	GO:0031224//intrinsic to membrane	GO:0022857//transmembrane transporter activity	GO:0071702	gi|68492294|ref|XP_710080.1|/0/potential quinate permease [Candida albicans SC5314]
orf19.1618	2142	2478	6657	124.258	319.036	1.36038	Up	0	0	GO:0044424//intracellular part	GO:0030246//carbohydrate binding;GO:0008483//transaminase activity	GO:0005975//carbohydrate metabolic process	gi|1707898|sp|P53704.2|GFA1_CANAL/0/RecName: Full=Glucosamine--fructose-6-phosphate aminotransferase [isomerizing]; Short=GFAT; AltName: Full=D-fructose-6-phosphate amidotransferase; AltName: Full=Hexosephosphate aminotransferase
orf19.2416.1	432	232	623	57.6829	148.042	1.35979	Up	4.1167e-13	1.47795e-12	-	GO:0046872//metal ion binding	-	gi|241958306|ref|XP_002421872.1|/3.27326e-77/calmodulin-like myosin light chain, putative; myosin light chain, putative [Candida dubliniensis CD36]
orf19.4655	2838	212	569	8.02354	20.5816	1.35905	Up	0	0	-	-	GO:0006810//transport	gi|68466195|ref|XP_722872.1|/0/potential oligopeptide transporter [Candida albicans SC5314]
orf19.2533.1	288	444	1191	165.59	424.521	1.35822	Up	1.20082e-12	3.80404e-12	-	-	-	gi|344304228|gb|EGW34477.1|/2.20798e-33/hypothetical protein SPAPADRAFT_59898 [Spathaspora passalidarum NRRL Y-27907]
orf19.3394	630	150	402	25.5737	65.5037	1.35691	Up	3.24186e-14	1.44888e-13	GO:0031224//intrinsic to membrane	-	-	gi|68478405|ref|XP_716704.1|/6.92561e-119/hypothetical protein CaO19.3394 [Candida albicans SC5314]
orf19.5830	2799	1330	3562	51.0378	130.638	1.35594	Up	4.18176e-12	1.20091e-11	-	GO:0032559	GO:0050896//response to stimulus	gi|68481462|ref|XP_715370.1|/0/hypothetical protein CaO19.5830 [Candida albicans SC5314]
orf19.7513	1569	145	388	9.92631	25.3857	1.35469	Up	2.5313e-14	1.14301e-13	-	GO:0005506//iron ion binding;GO:0004497//monooxygenase activity	GO:0008152//metabolic process	gi|68474594|ref|XP_718670.1|/0/hypothetical protein CaO19.7513 [Candida albicans SC5314]
orf19.5466	408	2488	6656	654.988	1674.69	1.35435	Up	0	0	GO:0030529//ribonucleoprotein complex	GO:0005198//structural molecule activity;GO:0005488//binding	GO:0010467//gene expression	gi|68476375|ref|XP_717837.1|/9.49367e-53/likely cytosolic ribosomal protein S24 [Candida albicans SC5314]
orf19.1277	1179	384	1026	34.9833	89.3334	1.35253	Up	5.99298e-13	2.05849e-12	-	-	-	gi|68478846|ref|XP_716585.1|/1.71609e-101/hypothetical protein CaO19.1277 [Candida albicans SC5314]
orf19.6556	735	515	1374	75.2597	191.902	1.35042	Up	1.02207e-12	3.29934e-12	-	-	-	gi|68469210|ref|XP_721392.1|/7.52815e-92/hypothetical protein CaO19.6556 [Candida albicans SC5314]
orf19.3001	603	66	176	11.7563	29.9623	1.34972	Up	7.80532e-12	2.10878e-11	-	GO:0032561//guanyl ribonucleotide binding	GO:0035556//intracellular signal transduction	gi|241948475|ref|XP_002416960.1|/7.02279e-102/M-phase controlling GTPase, putative; septum-promoting GTP-binding protein, putative [Candida dubliniensis CD36]
orf19.7048.1	204	381	1016	200.603	511.262	1.34972	Up	3.49276e-13	1.29188e-12	GO:0015935//small ribosomal subunit	GO:0005198//structural molecule activity	GO:0042254//ribosome biogenesis;GO:0010467//gene expression	gi|238883241|gb|EEQ46879.1|/5.0639e-30/40S ribosomal protein S28-A [Candida albicans WO-1]
orf19.7504	930	1247	3323	144.021	366.798	1.34871	Up	4.93494e-12	1.38723e-11	-	-	-	gi|68474576|ref|XP_718661.1|/6.37256e-95/hypothetical protein CaO19.7504 [Candida albicans SC5314]
orf19.2198	2157	256	682	12.7477	32.4574	1.34831	Up	0	0	-	-	-	gi|68479981|ref|XP_716038.1|/0/conserved fungal protein CFP3 [Candida albicans SC5314]
orf19.4142	1509	53	141	3.7725	9.59202	1.34631	Up	1.03387e-09	2.45669e-09	GO:0031224//intrinsic to membrane	-	-	gi|238882550|gb|EEQ46188.1|/0/conserved hypothetical protein [Candida albicans WO-1]
orf19.2232	525	1027	2731	210.113	534.002	1.34568	Up	1.95843e-13	7.65592e-13	GO:0030529//ribonucleoprotein complex	GO:0005198//structural molecule activity	GO:0010467//gene expression	gi|238883579|gb|EEQ47217.1|/1.7129e-94/60S ribosomal protein L11 [Candida albicans WO-1]
orf19.5253	2199	178	473	8.69436	22.0809	1.34464	Up	1.25455e-13	5.13753e-13	-	GO:0004672//protein kinase activity;GO:0032559	GO:0006464//protein modification process	gi|68479157|ref|XP_716384.1|/0/likely protein kinase [Candida albicans SC5314]
orf19.4210	1392	125	332	9.64525	24.4838	1.34394	Up	2.39808e-14	1.08446e-13	-	GO:0003824//catalytic activity	-	gi|68489796|ref|XP_711285.1|/0/hypothetical protein CaO19.11686 [Candida albicans SC5314]
orf19.111	1707	217	576	13.6543	34.6393	1.34306	Up	3.47944e-13	1.29007e-12	GO:0031224//intrinsic to membrane	GO:0005275//amine transmembrane transporter activity	GO:0006865//amino acid transport	gi|68483517|ref|XP_714319.1|/0/potential arginine permease [Candida albicans SC5314]
orf19.7609	375	45	119	12.8891	32.5759	1.33765	Up	2.45624e-08	5.4352e-08	-	-	-	gi|68473129|ref|XP_719370.1|/5.38735e-40/hypothetical protein CaO19.7609 [Candida albicans SC5314]
orf19.5094	2226	59	156	2.84688	7.19415	1.33744	Up	1.6554e-10	4.06144e-10	-	-	-	gi|68476677|ref|XP_717631.1|/0/hypothetical protein CaO19.5094 [Candida albicans SC5314]
orf19.1424	1716	187	494	11.7049	29.5522	1.33615	Up	3.43504e-13	1.27516e-12	-	-	GO:0006810//transport	gi|68489246|ref|XP_711552.1|/0/potential transmembrane protein [Candida albicans SC5314]
orf19.5992	1341	1794	4737	143.693	362.622	1.33548	Up	2.42228e-12	7.36441e-12	-	-	GO:0006351//transcription, DNA-dependent	gi|68465681|ref|XP_723202.1|/1.25716e-159/potential fungal zinc cluster transcription factor [Candida albicans SC5314]
orf19.367	2403	3133	8254	140.039	352.607	1.33223	Up	0	0	GO:0031224//intrinsic to membrane	GO:0005451//monovalent cation:hydrogen antiporter activity	GO:0030001//metal ion transport	gi|68491735|ref|XP_710335.1|/0/Na+/H+ antiporter [Candida albicans SC5314]
orf19.4612	726	19	50	2.81099	7.0699	1.33061	Up	0.00034476	0.000576234	-	GO:0003824//catalytic activity	-	gi|68466111|ref|XP_722830.1|/1.66945e-136/hypothetical protein CaO19.12082 [Candida albicans SC5314]
orf19.6220.4	369	1686	4435	490.765	1233.81	1.33001	Up	4.43002e-12	1.2633e-11	GO:0030529//ribonucleoprotein complex	GO:0005198//structural molecule activity	GO:0010467//gene expression	gi|354546516|emb|CCE43248.1|/1.12448e-53/hypothetical protein CPAR2_208930 [Candida parapsilosis]
orf19.6313	2160	35	92	1.74043	4.37234	1.32896	Up	1.10142e-06	2.21809e-06	-	-	-	gi|68490132|ref|XP_711115.1|/0/possible mannosyltransferase [Candida albicans SC5314]
orf19.3843	807	442	1161	58.829	147.686	1.32793	Up	0	0	-	-	-	gi|68477393|ref|XP_717323.1|/2.11322e-109/hypothetical protein CaO19.11324 [Candida albicans SC5314]
orf19.5112	2034	16501	43333	871.369	2187	1.32759	Up	0	0	-	GO:0043169//cation binding;GO:0016744	-	gi|68476711|ref|XP_717648.1|/0/hypothetical protein CaO19.5112 [Candida albicans SC5314]
orf19.5579	807	66	173	8.78442	22.0066	1.32492	Up	2.31446e-11	5.9282e-11	-	GO:0003676//nucleic acid binding	GO:0006281//DNA repair	gi|68473400|ref|XP_719258.1|/7.74191e-120/hypothetical protein CaO19.13025 [Candida albicans SC5314]
orf19.5851	2793	236	618	9.07578	22.7142	1.3235	Up	5.29132e-13	1.84442e-12	GO:0044464//cell part	GO:0008238//exopeptidase activity	GO:0019538//protein metabolic process	gi|68490750|ref|XP_710817.1|/0/potential alpha-factor pheromone maturation protease [Candida albicans SC5314]
orf19.5636	726	69248	180937	10245	25584.1	1.32033	Up	0	0	-	-	-	gi|68485373|ref|XP_713364.1|/1.44309e-63/likely cell surface antigen [Candida albicans SC5314]
orf19.7585	1563	12596	32892	865.598	2160.29	1.31945	Up	0	0	-	GO:0016872//intramolecular lyase activity	GO:0006020//inositol metabolic process;GO:0006644//phospholipid metabolic process	gi|68473083|ref|XP_719347.1|/0/potential inositol-1-phosphate synthase [Candida albicans SC5314]
orf19.4355	513	87	227	18.2157	45.4243	1.31829	Up	0	0	-	-	-	gi|68481781|ref|XP_715132.1|/2.13571e-78/hypothetical protein CaO19.4355 [Candida albicans SC5314]
orf19.1212	1110	2402	6263	232.43	579.215	1.3173	Up	0	0	-	-	-	gi|68491258|ref|XP_710563.1|/4.26774e-99/hypothetical protein CaO19.1212 [Candida albicans SC5314]
orf19.4229	579	145	377	26.8988	66.841	1.31319	Up	2.5313e-14	1.14386e-13	-	GO:0003824//catalytic activity	-	gi|238882621|gb|EEQ46259.1|/3.89526e-107/diphosphoinositol polyphosphate phosphohydrolase DDP1 [Candida albicans WO-1]
orf19.2864.1	450	1704	4425	406.724	1009.44	1.31143	Up	8.98836e-13	2.94822e-12	GO:0030529//ribonucleoprotein complex	GO:0005198//structural molecule activity	GO:0010467//gene expression	gi|241958294|ref|XP_002421866.1|/4.48711e-64/60s ribosomal protein, putative [Candida dubliniensis CD36]
orf19.5139	2238	639	1659	30.6679	76.0968	1.31111	Up	8.87512e-13	2.9142e-12	-	-	-	gi|68477917|ref|XP_716962.1|/0/hypothetical LPF family protein 33 [Candida albicans SC5314]
orf19.93	456	284	737	66.8954	165.914	1.31046	Up	1.14797e-13	4.77462e-13	-	-	-	gi|241956330|ref|XP_002420885.1|/1.87975e-41/mitochondrial intermembrane space cysteine motif protein, putative [Candida dubliniensis CD36]
orf19.6286.2	249	2244	5823	967.98	2400.64	1.31037	Up	0	0	GO:0030529//ribonucleoprotein complex	GO:0043169//cation binding;GO:0005198//structural molecule activity	GO:0010467//gene expression	gi|241959102|ref|XP_002422270.1|/1.98454e-42/ribosomal protein, small subunit, putative [Candida dubliniensis CD36]
orf19.5181	3246	672	1743	22.2364	55.1225	1.30972	Up	7.69384e-13	2.55792e-12	GO:0031224//intrinsic to membrane	GO:0004673//protein histidine kinase activity;GO:0004871//signal transducer activity;GO:0032559	GO:0006468//protein phosphorylation;GO:0007165//signal transduction;GO:0006351//transcription, DNA-dependent	gi|77022892|ref|XP_888890.1|/0/hypothetical protein CaO19_5181 [Candida albicans SC5314]
orf19.7010	1833	150	389	8.78965	21.7855	1.30949	Up	3.24186e-14	1.44783e-13	-	GO:0003824//catalytic activity	-	gi|68471055|ref|XP_720304.1|/0/hypothetical protein CaO19.7010 [Candida albicans SC5314]
orf19.3516	648	318	824	52.7102	130.537	1.3083	Up	2.2049e-13	8.4625e-13	-	GO:0016836//hydro-lyase activity;GO:0046914//transition metal ion binding	-	gi|68492119|ref|XP_710161.1|/5.46969e-122/hypothetical protein CaO19.3516 [Candida albicans SC5314]
orf19.198	1722	1863	4827	116.204	287.756	1.30818	Up	9.41336e-12	2.51874e-11	-	GO:0016884//carbon-nitrogen ligase activity, with glutamine as amido-N-donor	GO:0006528//asparagine metabolic process	gi|68487045|ref|XP_712583.1|/0/hypothetical protein CaO19.198 [Candida albicans SC5314]
orf19.652	2055	208	537	10.8716	26.8252	1.30302	Up	3.97904e-13	1.43527e-12	-	GO:0016788//hydrolase activity, acting on ester bonds;GO:0003676//nucleic acid binding	GO:0006259//DNA metabolic process	gi|68488322|ref|XP_711995.1|/0/hypothetical protein CaO19.652 [Candida albicans SC5314]
orf19.685	915	277	714	32.5163	80.1046	1.30072	Up	5.9286e-14	2.58726e-13	GO:0031224//intrinsic to membrane	-	GO:0051234//establishment of localization	gi|238883169|gb|EEQ46807.1|/4.9782e-161/hypothetical protein CAWG_05173 [Candida albicans WO-1]
orf19.909.1	225	54	139	25.7783	63.418	1.29874	Up	3.74994e-09	8.6977e-09	-	GO:0003824//catalytic activity	-	gi|241951104|ref|XP_002418274.1|/3.46231e-34/ATP synthase K chain, mitochondrial, putative [Candida dubliniensis CD36]
orf19.760	372	28	72	8.08459	19.8687	1.29725	Up	2.39252e-05	4.38748e-05	GO:0030529//ribonucleoprotein complex	GO:0005198//structural molecule activity	GO:0010467//gene expression	gi|68484933|ref|XP_713605.1|/6.77124e-67/likely mitochondrial ribosomal protein L36 [Candida albicans SC5314]
orf19.3112	1407	9651	24779	736.751	1807.88	1.29505	Up	0	0	GO:0044464//cell part	GO:0008324//cation transmembrane transporter activity	GO:0006812//cation transport	gi|68481152|ref|XP_715491.1|/0/potential high-affinity zinc-iron permease [Candida albicans SC5314]
orf19.1738.1	288	53	136	19.7663	48.476	1.29422	Up	6.07212e-09	1.39463e-08	GO:0015630//microtubule cytoskeleton	GO:0005515//protein binding	GO:0043623//cellular protein complex assembly	gi|238879924|gb|EEQ43562.1|/2.97036e-46/conserved hypothetical protein [Candida albicans WO-1]
orf19.3519	1041	78	200	8.04798	19.7224	1.29314	Up	1.6358e-12	5.07165e-12	-	GO:0008135//translation factor activity, nucleic acid binding;GO:0046914//transition metal ion binding;GO:0003677//DNA binding;GO:0001071//nucleic acid binding transcription factor activity	GO:0006351//transcription, DNA-dependent;GO:0006412//translation	gi|68492125|ref|XP_710164.1|/0/likely transcription factor TFIIB [Candida albicans SC5314]
orf19.3534	633	328	840	55.6561	136.225	1.29138	Up	2.49356e-13	9.48111e-13	GO:0016020//membrane	GO:0032561//guanyl ribonucleotide binding	GO:0035556//intracellular signal transduction	gi|46852028|gb|AAT02710.1|/6.33434e-120/Rho3p [Candida albicans]
orf19.6146	756	954	2442	135.541	331.592	1.29068	Up	1.58562e-12	4.92856e-12	-	-	-	gi|68487534|ref|XP_712388.1|/7.43316e-98/hypothetical protein CaO19.13565 [Candida albicans SC5314]
orf19.1326	1971	93	237	5.06803	12.3436	1.28427	Up	7.57172e-14	3.25781e-13	-	-	-	gi|68486233|ref|XP_709965.1|/0/hypothetical LPF family protein 13 [Candida albicans SC5314]
orf19.5886	483	491	1251	109.189	265.883	1.28397	Up	4.714e-13	1.66501e-12	GO:0043231//intracellular membrane-bounded organelle;GO:0033177//proton-transporting two-sector ATPase complex, proton-transporting domain	GO:0015078//hydrogen ion transmembrane transporter activity	GO:0034220//ion transmembrane transport;GO:0015992//proton transport	gi|149240433|ref|XP_001526092.1|/1.12596e-56/vacuolar ATP synthase 16 kDa proteolipid subunit [Lodderomyces elongisporus NRRL YB-4239]
orf19.5126	1194	1596	4064	143.573	349.405	1.28312	Up	5.82646e-12	1.61044e-11	-	-	-	gi|68477895|ref|XP_716951.1|/1.54242e-73/hypothetical protein CaO19.5128 [Candida albicans SC5314]
orf19.3222	2997	1076	2739	38.5628	93.8178	1.28265	Up	5.5298e-12	1.53539e-11	GO:0031224//intrinsic to membrane	-	GO:0006810//transport	gi|68475945|ref|XP_717913.1|/0/potential sulfate transporter [Candida albicans SC5314]
orf19.2903	2754	1060	2698	41.3414	100.568	1.28251	Up	4.07674e-12	1.17627e-11	-	GO:0005488//binding	-	gi|238881258|gb|EEQ44896.1|/0/conserved hypothetical protein [Candida albicans WO-1]
orf19.5903	1653	837	2130	54.387	132.278	1.28224	Up	1.04139e-12	3.35993e-12	-	GO:0060089	GO:0023052//signaling	gi|68465511|ref|XP_723117.1|/0/potential bud site selection protein [Candida albicans SC5314]
orf19.2812	1512	311	791	22.0928	53.7038	1.28144	Up	3.4417e-14	1.53483e-13	-	-	-	gi|68490330|ref|XP_711023.1|/0/hypothetical protein CaO19.10330 [Candida albicans SC5314]
orf19.6873	621	2404	6110	415.801	1010.02	1.28042	Up	0	0	GO:0030529//ribonucleoprotein complex	-	-	gi|68486561|ref|XP_712831.1|/1.11595e-81/likely cytosolic ribosomal protein S8 [Candida albicans SC5314]
orf19.319	237	67	170	30.3647	73.6344	1.27798	Up	1.17414e-10	2.90165e-10	-	-	-	gi|238880767|gb|EEQ44405.1|/1.43675e-40/conserved hypothetical protein [Candida albicans WO-1]
orf19.4082	639	8461	21439	1422.21	3444.16	1.27602	Up	0	0	-	-	-	gi|68483602|ref|XP_714254.1|/1.36363e-45/hypothetical protein CaO19.4083 [Candida albicans SC5314]
orf19.3788.1	321	2482	6284	830.5	2009.61	1.27486	Up	0	0	GO:0030529//ribonucleoprotein complex	GO:0005198//structural molecule activity	GO:0010467//gene expression	gi|241954770|ref|XP_002420106.1|/4.31016e-53/ribosomal protein, large subunit, putative [Candida dubliniensis CD36]
orf19.1228	1095	288	729	28.2502	68.3429	1.27453	Up	5.10702e-14	2.25446e-13	GO:0005667//transcription factor complex	GO:0003676//nucleic acid binding;GO:0001071//nucleic acid binding transcription factor activity	GO:0006351//transcription, DNA-dependent	gi|238878800|gb|EEQ42438.1|/7.17902e-75/predicted protein [Candida albicans WO-1]
orf19.6048	930	204	516	23.5608	56.957	1.27348	Up	2.15606e-13	8.29588e-13	-	GO:0016740//transferase activity	-	gi|68473814|ref|XP_719010.1|/3.54381e-162/hypothetical protein CaO19.6048 [Candida albicans SC5314]
orf19.3354	789	265	670	36.0754	87.1722	1.27285	Up	6.91002e-13	2.33027e-12	GO:0030529//ribonucleoprotein complex	GO:0003676//nucleic acid binding;GO:0005198//structural molecule activity	GO:0010467//gene expression	gi|68477663|ref|XP_717144.1|/1.0308e-137/likely cytosolic ribosomal protein S4 [Candida albicans SC5314]
orf19.1964	1503	190	480	13.5781	32.784	1.27172	Up	3.09974e-13	1.16483e-12	-	-	-	gi|68480690|ref|XP_715726.1|/0/conserved fungal hypothetical protein [Candida albicans SC5314]
orf19.1697	1062	259	654	26.195	63.2169	1.27102	Up	2.07168e-13	8.03187e-13	-	GO:0046914//transition metal ion binding	-	gi|68468419|ref|XP_721769.1|/4.49973e-167/hypothetical protein CaO19.1697 [Candida albicans SC5314]
orf19.4805	2601	467	1177	19.285	46.4533	1.2683	Up	6.09734e-13	2.08847e-12	GO:0044464//cell part	-	-	gi|68464827|ref|XP_723491.1|/0/hypothetical protein CaO19.4805 [Candida albicans SC5314]
orf19.330.1	234	56	141	25.7048	61.8562	1.26688	Up	5.74394e-09	1.32074e-08	-	-	-	gi|241953069|ref|XP_002419256.1|/2.6372e-26/ubiquitin-like protein with similarity to mammalian NEDD8, putative [Candida dubliniensis CD36]
orf19.7456	1065	238	599	24.0033	57.7374	1.26628	Up	7.6894e-13	2.55923e-12	-	-	-	gi|68479899|ref|XP_716117.1|/0/hypothetical protein CaO19.7456 [Candida albicans SC5314]
orf19.3526	1665	729	1833	47.028	113.013	1.2649	Up	1.16396e-12	3.72393e-12	GO:0031224//intrinsic to membrane	GO:0022857//transmembrane transporter activity	GO:0006810//transport	gi|68482255|ref|XP_714885.1|/0/potential myo-inositol transporter [Candida albicans SC5314]
orf19.4937	3642	1204	3026	35.5083	85.2922	1.26426	Up	1.37179e-12	4.30994e-12	-	GO:0008375//acetylglucosaminyltransferase activity	-	gi|231792|sp|P30573.1|CHS3_CANAL/0/RecName: Full=Chitin synthase 3; AltName: Full=Chitin-UDP acetyl-glucosaminyl transferase 3; AltName: Full=Class-IV chitin synthase 3
orf19.2887	615	146	366	25.4988	61.0922	1.26056	Up	5.66214e-14	2.4816e-13	-	-	-	gi|68481003|ref|XP_715543.1|/2.37072e-100/hypothetical protein CaO19.2887 [Candida albicans SC5314]
orf19.6402	1200	389	975	34.8186	83.4072	1.26031	Up	0	0	-	GO:0016846//carbon-sulfur lyase activity;GO:0048037//cofactor binding	GO:0019752//carboxylic acid metabolic process	gi|238880232|gb|EEQ43870.1|/0/cystathionine gamma-lyase [Candida albicans WO-1]
orf19.6408	1620	752	1884	49.8592	119.384	1.25968	Up	2.46936e-12	7.50008e-12	-	GO:0043169//cation binding;GO:0005515//protein binding	GO:0044267//cellular protein metabolic process	gi|68479431|ref|XP_716247.1|/0/potential dnaJ-like heat shock protein [Candida albicans SC5314]
orf19.3415.1	396	1805	4518	489.581	1171.2	1.25837	Up	4.66426e-12	1.31902e-11	GO:0030529//ribonucleoprotein complex	GO:0005198//structural molecule activity	GO:0010467//gene expression	gi|8928332|sp|O94008.1|RL32_CANAL/5.25799e-59/RecName: Full=60S ribosomal protein L32
orf19.1985	1212	173	433	15.3316	36.6746	1.25828	Up	3.89688e-13	1.41819e-12	-	GO:0004672//protein kinase activity;GO:0032559	GO:0006464//protein modification process	gi|68492029|ref|XP_710210.1|/0/hypothetical protein CaO19.3488 [Candida albicans SC5314]
orf19.4670	2466	711	1776	30.9684	73.9316	1.25539	Up	0	0	-	-	-	gi|68466223|ref|XP_722886.1|/0/potential zinc finger protein [Candida albicans SC5314]
orf19.7312	1356	971	2424	76.9135	183.507	1.25453	Up	2.66564e-12	8.02448e-12	-	GO:0046912//transferase activity, transferring acyl groups, acyl groups converted into alkyl on transfer;GO:0016747//transferase activity, transferring acyl groups other than amino-acyl groups	GO:0006720//isoprenoid metabolic process	gi|68479024|ref|XP_716446.1|/0/hypothetical protein CaO19.7312 [Candida albicans SC5314]
orf19.3756	1923	524	1308	29.2681	69.8246	1.25441	Up	0	0	GO:0031981//nuclear lumen	GO:0003676//nucleic acid binding;GO:0042623//ATPase activity, coupled;GO:0032559	GO:0042254//ribosome biogenesis	gi|238878350|gb|EEQ41988.1|/0/ATP-dependent RNA helicase ROK1 [Candida albicans WO-1]
orf19.7500	2307	914	2279	42.5541	101.409	1.25282	Up	0	0	GO:0031224//intrinsic to membrane	GO:0017111//nucleoside-triphosphatase activity;GO:0015405;GO:0032559	GO:0006810//transport;GO:0009207	gi|68474568|ref|XP_718657.1|/0/hypothetical protein CaO19.7500 [Candida albicans SC5314]
orf19.3572.3	339	1193	2970	377.993	899.367	1.25055	Up	2.9532e-12	8.83792e-12	GO:0030529//ribonucleoprotein complex	GO:0005198//structural molecule activity	GO:0010467//gene expression	gi|238882312|gb|EEQ45950.1|/5.71747e-58/conserved hypothetical protein [Candida albicans WO-1]
orf19.1761	516	452	1122	94.0874	223.215	1.24636	Up	7.15872e-13	2.40222e-12	-	GO:0016740//transferase activity	-	gi|68483329|ref|XP_714406.1|/1.32275e-67/hypothetical protein CaO19.1761 [Candida albicans SC5314]
orf19.2439.1	237	112	278	50.7589	120.414	1.24627	Up	0	0	-	GO:0015078//hydrogen ion transmembrane transporter activity;GO:0003824//catalytic activity	GO:0008152//metabolic process	gi|238878947|gb|EEQ42585.1|/2.37372e-35/conserved hypothetical protein [Candida albicans WO-1]
orf19.2200	1311	270	670	22.121	52.4629	1.24588	Up	4.57412e-13	1.62123e-12	GO:0044464//cell part	-	-	gi|68479985|ref|XP_716040.1|/0/hypothetical protein CaO19.2200 [Candida albicans SC5314]
orf19.685.1	234	81	201	37.1802	88.178	1.24588	Up	6.45484e-12	1.76656e-11	-	-	-	gi|344300072|gb|EGW30412.1|/1.22787e-15/hypothetical protein SPAPADRAFT_142985 [Spathaspora passalidarum NRRL Y-27907]
orf19.1317	2535	1425	3533	60.3781	143.069	1.24461	Up	1.79257e-12	5.53243e-12	GO:0031224//intrinsic to membrane	-	GO:0051234//establishment of localization	gi|68486217|ref|XP_709957.1|/0/likely oxysterol-binding protein [Candida albicans SC5314]
orf19.3051	882	144	357	17.5362	41.5508	1.24454	Up	1.31894e-13	5.38319e-13	GO:0031224//intrinsic to membrane	-	-	gi|68468981|ref|XP_721549.1|/1.7916e-160/hypothetical protein CaO19.3051 [Candida albicans SC5314]
orf19.7327	576	631	1563	117.666	278.559	1.24329	Up	0	0	-	-	-	gi|238880308|gb|EEQ43946.1|/4.39653e-103/inorganic phosphate transporter PHO88 [Candida albicans WO-1]
orf19.2680	5244	1184	2932	24.2511	57.396	1.2429	Up	2.4969e-12	7.56869e-12	GO:0031224//intrinsic to membrane	GO:0042625//ATPase activity, coupled to transmembrane movement of ions;GO:0046872//metal ion binding;GO:0005548//phospholipid transporter activity;GO:0032559	GO:0009206;GO:0006869//lipid transport	gi|68470852|ref|XP_720433.1|/0/hypothetical protein CaO19.2680 [Candida albicans SC5314]
orf19.1888	993	166	411	17.9557	42.4886	1.24264	Up	2.29816e-13	8.79283e-13	-	GO:0016787//hydrolase activity	-	gi|68485821|ref|XP_713191.1|/0/hypothetical protein CaO19.9444 [Candida albicans SC5314]
orf19.5426	2850	372	921	14.0198	33.1738	1.24258	Up	4.50084e-13	1.59711e-12	-	GO:0004091//carboxylesterase activity	GO:0044238//primary metabolic process	gi|68476297|ref|XP_717798.1|/0/potential patatin-like phospholipase [Candida albicans SC5314]
orf19.6196	567	326	807	61.7557	146.107	1.24238	Up	6.86118e-13	2.31764e-12	-	-	-	gi|68474156|ref|XP_718787.1|/6.31438e-91/hypothetical protein CaO19.6196 [Candida albicans SC5314]
orf19.5519	1185	439	1084	39.7914	93.9055	1.23875	Up	0	0	GO:0044424//intracellular part	GO:0016769//transferase activity, transferring nitrogenous groups;GO:0008168//methyltransferase activity	GO:0006730//one-carbon metabolic process;GO:0006544//glycine metabolic process	gi|68473519|ref|XP_719084.1|/0/hypothetical protein CaO19.5519 [Candida albicans SC5314]
orf19.7089	2754	711	1755	27.7299	65.4174	1.23823	Up	0	0	GO:0031224//intrinsic to membrane	GO:0019829//cation-transporting ATPase activity;GO:0032559	GO:0009206;GO:0070838//divalent metal ion transport	gi|68471207|ref|XP_720380.1|/0/hypothetical protein CaO19.7089 [Candida albicans SC5314]
orf19.236	576	639	1577	119.157	281.054	1.23798	Up	8.87512e-13	2.91577e-12	GO:0030529//ribonucleoprotein complex	GO:0003723//RNA binding;GO:0005198//structural molecule activity	GO:0010467//gene expression	gi|68471517|ref|XP_720065.1|/4.39653e-103/likely cytosolic ribosomal protein L9 [Candida albicans SC5314]
orf19.1409.1	375	216	533	61.8679	145.907	1.23779	Up	3.48388e-13	1.29015e-12	GO:0030529//ribonucleoprotein complex	GO:0005198//structural molecule activity	GO:0010467//gene expression	gi|241954682|ref|XP_002420062.1|/2.18723e-41/ribosomal protein of the large subunit, putative [Candida dubliniensis CD36]
orf19.5050	2088	41	101	2.1091	4.96559	1.23534	Up	1.39087e-06	2.78083e-06	GO:0044424//intracellular part	GO:0050662//coenzyme binding	GO:0002097	gi|68476591|ref|XP_717588.1|/0/potential mitochondrial tRNA modification protein [Candida albicans SC5314]
orf19.6167	882	487	1198	59.3066	139.434	1.23332	Up	8.14904e-14	3.46958e-13	-	GO:0003824//catalytic activity	GO:0008152//metabolic process	gi|68491112|ref|XP_710648.1|/4.26431e-162/likely dihydroxyacetone phosphate reductase [Candida albicans SC5314]
orf19.3785	837	48	118	6.15969	14.4723	1.23236	Up	1.88345e-07	3.96535e-07	-	GO:0005515//protein binding	-	gi|68477277|ref|XP_717265.1|/1.33864e-154/possible DnaJ-like spliceosome component cwf23 [Candida albicans SC5314]
orf19.3565	861	22	54	2.74449	6.43829	1.23014	Up	0.00046099	0.000761549	-	-	-	gi|68482206|ref|XP_714987.1|/5.37596e-138/hypothetical protein CaO19.11049 [Candida albicans SC5314]
orf19.1591	1209	739	1812	65.654	153.855	1.22862	Up	4.67848e-13	1.65438e-12	GO:0042579//microbody	GO:0016453	-	gi|68492189|ref|XP_710124.1|/0/hypothetical protein CaO19.1591 [Candida albicans SC5314]
orf19.5615	894	385	942	46.2558	108.167	1.22555	Up	7.7205e-13	2.56539e-12	-	GO:0016616//oxidoreductase activity, acting on the CH-OH group of donors, NAD or NADP as acceptor	GO:0008152//metabolic process	gi|68473701|ref|XP_719175.1|/2.23673e-166/likely dihydroxyacetone phosphate reductase [Candida albicans SC5314]
orf19.3942.1	279	1516	3701	583.63	1361.74	1.22233	Up	3.25606e-12	9.64046e-12	GO:0030529//ribonucleoprotein complex	-	-	gi|241955991|ref|XP_002420716.1|/9.98954e-34/ribosomal protein, large subunit, putative [Candida dubliniensis CD36]
orf19.2657	2124	25	61	1.26424	2.94819	1.22156	Up	0.000210532	0.000357355	-	-	-	gi|68488199|ref|XP_712060.1|/0/hypothetical protein CaO19.10180 [Candida albicans SC5314]
orf19.5019	2085	745	1816	38.3789	89.4108	1.22013	Up	0	0	-	-	-	gi|238878246|gb|EEQ41884.1|/5.46106e-126/conserved hypothetical protein [Candida albicans WO-1]
orf19.1077	2253	327	797	15.5894	36.3143	1.21997	Up	7.15872e-13	2.40618e-12	GO:0031224//intrinsic to membrane;GO:0043231//intracellular membrane-bounded organelle;GO:0019866//organelle inner membrane	GO:0017111//nucleoside-triphosphatase activity;GO:0015405;GO:0032559	GO:0000041//transition metal ion transport;GO:0009207	gi|68488063|ref|XP_712090.1|/0/potential mitochondrial ABC transporter [Candida albicans SC5314]
orf19.3991	2202	222	540	10.8288	25.1742	1.21708	Up	5.4623e-14	2.39745e-13	-	GO:0016787//hydrolase activity	GO:0006629//lipid metabolic process	gi|238882873|gb|EEQ46511.1|/0/conserved hypothetical protein [Candida albicans WO-1]
orf19.3653	1953	630	1531	34.6482	80.4735	1.21573	Up	8.34888e-13	2.75175e-12	-	-	-	gi|68489606|ref|XP_711373.1|/0/potential very long-chain fatty acyl-CoA synthetase Fat1p [Candida albicans SC5314]
orf19.7111	465	458	1113	105.793	245.71	1.21572	Up	1.73972e-12	5.37476e-12	GO:0016020//membrane	-	-	gi|118573787|sp|Q5AFF7.2|FIS1_CANAL/1.4008e-58/RecName: Full=Mitochondria fission 1 protein
orf19.3122.2	282	59	143	22.4722	52.0555	1.21191	Up	1.46973e-08	3.29035e-08	-	-	-	gi|238881209|gb|EEQ44847.1|/8.72838e-30/predicted protein [Candida albicans WO-1]
orf19.2506	1794	1553	3761	92.9805	215.209	1.21074	Up	5.3586e-12	1.49056e-11	-	-	-	gi|68474966|ref|XP_718524.1|/0/hypothetical protein CaO19.2506 [Candida albicans SC5314]
orf19.4723	852	117	283	14.7499	34.0978	1.20898	Up	1.72307e-13	6.84969e-13	-	GO:0070566//adenylyltransferase activity	-	gi|238878714|gb|EEQ42352.1|/1.12801e-164/hypothetical protein CAWG_00560 [Candida albicans WO-1]
orf19.1944	2472	1656	4004	71.954	166.275	1.20842	Up	4.07386e-12	1.176e-11	-	GO:0004871//signal transducer activity	-	gi|24636500|dbj|BAC22916.1|/0/G-protein coupled receptor [Candida albicans]
orf19.1666	1596	764	1839	51.4166	118.285	1.20196	Up	1.44107e-13	5.83877e-13	-	-	-	gi|68468367|ref|XP_721743.1|/2.54267e-141/hypothetical protein CaO19.1666 [Candida albicans SC5314]
orf19.1227	591	37	89	6.72445	15.459	1.20096	Up	9.5069e-06	1.79565e-05	-	-	GO:0006351//transcription, DNA-dependent	gi|68478746|ref|XP_716535.1|/2.15758e-84/potential fungal zinc cluster transcription factor [Candida albicans SC5314]
orf19.3216	2505	232	558	9.94771	22.8669	1.20082	Up	4.1167e-13	1.47882e-12	-	-	-	gi|68490457|ref|XP_710956.1|/0/hypothetical protein CaO19.3216 [Candida albicans SC5314]
orf19.1358	972	919	2210	101.553	233.403	1.20059	Up	1.48659e-12	4.63488e-12	-	GO:0003677//DNA binding	GO:0006351//transcription, DNA-dependent	gi|68482804|ref|XP_714628.1|/2.84786e-133/coordinator of morphogenesis and amino acid starvation response [Candida albicans SC5314]
orf19.6994	1110	811	1949	78.4767	180.247	1.19964	Up	0	0	-	GO:0004084//branched-chain-amino-acid transaminase activity	GO:0008652//cellular amino acid biosynthetic process	gi|238880957|gb|EEQ44595.1|/0/branched-chain-amino-acid aminotransferase [Candida albicans WO-1]
orf19.6548	564	804	1932	153.116	351.648	1.19951	Up	1.94067e-13	7.60106e-13	GO:0044429//mitochondrial part	GO:0046914//transition metal ion binding;GO:0051536//iron-sulfur cluster binding	GO:0031163	gi|238883335|gb|EEQ46973.1|/1.48834e-76/iron sulfur cluster assembly protein 1, mitochondrial precursor [Candida albicans WO-1]
orf19.3286	1329	149	358	12.0422	27.6527	1.19933	Up	2.89768e-13	1.09293e-12	-	-	-	gi|68476071|ref|XP_717976.1|/0/hypothetical protein CaO19.3286 [Candida albicans SC5314]
orf19.4356	1944	331	795	18.2884	41.9808	1.19881	Up	0	0	GO:0031224//intrinsic to membrane	GO:0022857//transmembrane transporter activity	GO:0071702	gi|68481783|ref|XP_715133.1|/0/potential sugar transporter [Candida albicans SC5314]
orf19.5027	1710	517	1238	32.4741	74.3198	1.19446	Up	1.01252e-13	4.27231e-13	-	GO:0016454;GO:0048037//cofactor binding	GO:0008152//metabolic process	gi|68467365|ref|XP_722344.1|/0/hypothetical protein CaO19.12494 [Candida albicans SC5314]
orf19.7018	438	3890	9306	953.934	2181.07	1.19307	Up	1.00178e-11	2.67461e-11	GO:0015935//small ribosomal subunit	GO:0003676//nucleic acid binding;GO:0005198//structural molecule activity	GO:0010467//gene expression;GO:0022613//ribonucleoprotein complex biogenesis	gi|238883265|gb|EEQ46903.1|/3.47633e-79/40S ribosomal protein S18 [Candida albicans WO-1]
orf19.3031	882	356	851	43.3535	99.0469	1.19196	Up	6.21724e-13	2.12122e-12	GO:0031227//intrinsic to endoplasmic reticulum membrane	GO:0022892	GO:0006810//transport	gi|74587276|sp|Q5AI21.1|SEC62_CANAL/1.42617e-141/RecName: Full=Translocation protein SEC62
orf19.840	483	4774	11396	1061.64	2422.06	1.18994	Up	1.3624e-11	3.59039e-11	GO:0030529//ribonucleoprotein complex	GO:0005198//structural molecule activity	GO:0010467//gene expression	gi|238882167|gb|EEQ45805.1|/2.74773e-87/60S ribosomal protein L21-A [Candida albicans WO-1]
orf19.5287	1560	95	226	6.54096	14.8718	1.18501	Up	2.47824e-12	7.52332e-12	-	-	-	gi|68491683|ref|XP_710368.1|/0/hypothetical protein CaO19.5287 [Candida albicans SC5314]
orf19.1478	2256	1311	3118	62.4175	141.879	1.18464	Up	6.37202e-12	1.74624e-11	GO:0044464//cell part	GO:0004576//oligosaccharyl transferase activity	GO:0006464//protein modification process	gi|68466663|ref|XP_722527.1|/0/hypothetical protein CaO19.1478 [Candida albicans SC5314]
orf19.3219	1806	45	107	2.67632	6.082	1.1843	Up	1.53744e-06	3.06685e-06	-	-	-	gi|68490438|ref|XP_710969.1|/0/potential calcineurin-like phosphoesterase [Candida albicans SC5314]
orf19.3227	1536	139	330	9.72	22.0548	1.18206	Up	2.13384e-13	8.22073e-13	-	-	-	gi|68475955|ref|XP_717918.1|/0/hypothetical protein CaO19.3227 [Candida albicans SC5314]
orf19.1065	1938	9379	22266	519.811	1179.42	1.18202	Up	0	0	-	GO:0032559	GO:0050896//response to stimulus	gi|68484805|ref|XP_713714.1|/0/likely HSP70 family chaperonin [Candida albicans SC5314]
orf19.6343	1014	75	178	7.94449	18.0203	1.1816	Up	5.67458e-10	1.3611e-09	GO:0031224//intrinsic to membrane	-	-	gi|68489032|ref|XP_711629.1|/4.0324e-178/likely fatty acid elongase [Candida albicans SC5314]
orf19.3080	3141	1257	2983	42.9843	97.4912	1.18146	Up	5.6406e-12	1.56189e-11	-	-	-	gi|68481231|ref|XP_715390.1|/0/potential nuclear cohesin complex subunit fragment [Candida albicans SC5314]
orf19.2270	1755	2344	5560	143.458	325.22	1.18079	Up	0	0	GO:0044464//cell part	-	GO:0051234//establishment of localization	gi|68482456|ref|XP_714860.1|/0/probable NRAMP manganese transporter [Candida albicans SC5314]
orf19.6906	954	4515	10703	508.338	1151.69	1.1799	Up	1.66114e-11	4.34397e-11	-	-	-	gi|353526246|sp|P83774.2|GBLP_CANAL/0/RecName: Full=Guanine nucleotide-binding protein subunit beta-like protein; AltName: Full=Cytoplasmic antigenic protein 1
orf19.7078	462	160	379	37.1981	84.2126	1.17881	Up	1.108e-13	4.6336e-13	-	-	-	gi|68471185|ref|XP_720369.1|/7.45963e-73/hypothetical protein CaO19.7078 [Candida albicans SC5314]
orf19.493	615	2910	6877	508.23	1147.9	1.17544	Up	0	0	GO:0030529//ribonucleoprotein complex	GO:0005198//structural molecule activity	GO:0010467//gene expression	gi|68476935|ref|XP_717445.1|/1.53309e-107/likely cytosolic ribosomal protein L15 [Candida albicans SC5314]
orf19.828	798	168	397	22.6125	51.0702	1.17536	Up	1.80078e-13	7.13544e-13	GO:0030529//ribonucleoprotein complex	GO:0005198//structural molecule activity	GO:0010467//gene expression	gi|68469645|ref|XP_721074.1|/9.20378e-142/likely mitochondrial ribosomal protein (E. coli L28) [Candida albicans SC5314]
orf19.3592	1911	315	744	17.7049	39.9662	1.17463	Up	5.3313e-13	1.8573e-12	-	GO:0005515//protein binding	GO:0044267//cellular protein metabolic process	gi|68483208|ref|XP_714439.1|/0/potential DnaJ-like co-chaperone Jem1p [Candida albicans SC5314]
orf19.6375	360	2642	6233	788.267	1777.36	1.17298	Up	0	0	GO:0030529//ribonucleoprotein complex	GO:0003676//nucleic acid binding;GO:0005198//structural molecule activity	GO:0010467//gene expression	gi|241959190|ref|XP_002422314.1|/1.63369e-60/ribosomal protein, small subunit, putative [Candida dubliniensis CD36]
orf19.4743	2067	170	400	8.83388	19.8655	1.16915	Up	3.90354e-13	1.41724e-12	-	GO:0032559	-	gi|68464705|ref|XP_723430.1|/0/potential mitochondrial ATPase [Candida albicans SC5314]
orf19.1510	1881	556	1307	31.7489	71.3291	1.16778	Up	3.56382e-13	1.31181e-12	-	-	-	gi|68466721|ref|XP_722556.1|/0/hypothetical protein CaO19.1510 [Candida albicans SC5314]
orf19.7660	1572	155	364	10.5906	23.77	1.16635	Up	3.9746e-13	1.43452e-12	-	-	-	gi|68473227|ref|XP_719419.1|/0/hypothetical protein CaO19.7660 [Candida albicans SC5314]
orf19.6812	2310	2441	5731	113.501	254.682	1.166	Up	0	0	GO:0044464//cell part	GO:0000030//mannosyltransferase activity	GO:0006486//protein glycosylation	gi|68472223|ref|XP_719907.1|/0/hypothetical protein CaO19.6812 [Candida albicans SC5314]
orf19.5156	603	254	596	45.2438	101.463	1.16517	Up	4.15446e-13	1.48976e-12	-	-	-	gi|68477949|ref|XP_716978.1|/1.04456e-113/potential protein tyrosine phosphatase-like protein [Candida albicans SC5314]
orf19.7409	648	367	861	60.8322	136.398	1.16492	Up	4.70956e-13	1.66441e-12	GO:0012505//endomembrane system;GO:0031090//organelle membrane;GO:0043231//intracellular membrane-bounded organelle;GO:0031224//intrinsic to membrane	-	GO:0006810//transport	gi|74590355|sp|Q5A302.1|TMEDA_CANAL/4.79168e-118/RecName: Full=Endoplasmic reticulum vesicle protein 25; Flags: Precursor
orf19.3920	900	214	502	25.5396	57.2587	1.16476	Up	0	0	-	GO:0015036//disulfide oxidoreductase activity;GO:0016862//intramolecular oxidoreductase activity, interconverting keto- and enol-groups	GO:0018904;GO:0019725//cellular homeostasis	gi|68467982|ref|XP_721830.1|/1.62902e-148/potential thioredoxin [Candida albicans SC5314]
orf19.6469	2514	309	724	13.2019	29.5633	1.16306	Up	7.73382e-13	2.56702e-12	-	-	-	gi|77022832|ref|XP_888860.1|/0/hypothetical protein CaO19_6468 [Candida albicans SC5314]
orf19.5796	1575	207	485	14.1167	31.6112	1.16304	Up	1.66755e-13	6.66368e-13	GO:0044464//cell part	-	-	gi|74585523|sp|Q5A0L7.1|SHE9_CANAL/0/RecName: Full=Sensitive to high expression protein 9 homolog, mitochondrial; Flags: Precursor
orf19.2249	717	44	103	6.59138	14.7468	1.16175	Up	3.42912e-06	6.69615e-06	GO:0043231//intracellular membrane-bounded organelle;GO:0016020//membrane	GO:0004175//endopeptidase activity	-	gi|74585406|sp|Q59Z51.1|ATP23_CANAL/1.20688e-131/RecName: Full=Mitochondrial inner membrane protease ATP23
orf19.3465	654	1760	4117	289.053	646.224	1.1607	Up	6.77658e-12	1.84552e-11	GO:0030529//ribonucleoprotein complex	GO:0003676//nucleic acid binding;GO:0005198//structural molecule activity	GO:0010467//gene expression	gi|68487183|ref|XP_712535.1|/6.62785e-107/likely cytosolic ribosomal protein L1 [Candida albicans SC5314]
orf19.3437	1629	71	166	4.68145	10.4609	1.15997	Up	3.67786e-09	8.53375e-09	-	-	-	gi|68478485|ref|XP_716744.1|/0/hypothetical protein CaO19.3437 [Candida albicans SC5314]
orf19.768	2964	484	1129	17.5392	39.1017	1.15665	Up	1.72995e-12	5.34998e-12	GO:0031224//intrinsic to membrane	-	-	gi|68485024|ref|XP_713578.1|/0/hypothetical protein CaO19.768 [Candida albicans SC5314]
orf19.2792	2859	2078	4845	78.0682	173.964	1.15598	Up	0	0	-	-	-	gi|68488823|ref|XP_711758.1|/0/hypothetical protein CaO19.10310 [Candida albicans SC5314]
orf19.3322	480	359	837	80.3334	179.005	1.15593	Up	0	0	-	GO:0043169//cation binding;GO:0047429//nucleoside-triphosphate diphosphatase activity	GO:0009211	gi|353558786|sp|C4YFC7.1|DUT_CANAW/8.08934e-84/RecName: Full=Deoxyuridine 5'-triphosphate nucleotidohydrolase; Short=dUTPase; AltName: Full=dUTP pyrophosphatase
orf19.5658	1008	405	944	43.1556	96.1372	1.15555	Up	9.32588e-14	3.94864e-13	GO:0031224//intrinsic to membrane	GO:0016757//transferase activity, transferring glycosyl groups	-	gi|68485417|ref|XP_713386.1|/0/hypothetical protein CaO19.13103 [Candida albicans SC5314]
orf19.1325	1761	112	261	6.83127	15.2146	1.15523	Up	9.90318e-14	4.18149e-13	-	GO:0016755;GO:0016747//transferase activity, transferring acyl groups other than amino-acyl groups	-	gi|68486231|ref|XP_709964.1|/0/cephalosporin acylase [Candida albicans SC5314]
orf19.4149.1	468	1482	3451	340.13	756.971	1.15415	Up	4.031e-12	1.16472e-11	GO:0030529//ribonucleoprotein complex	GO:0005198//structural molecule activity	GO:0010467//gene expression	gi|241955329|ref|XP_002420385.1|/8.37864e-75/ribosomal protein, small subunit, putative [Candida dubliniensis CD36]
orf19.4842	342	107	249	33.6047	74.74	1.15322	Up	5.69322e-13	1.96768e-12	-	-	-	gi|68464901|ref|XP_723528.1|/1.83657e-59/hypothetical protein CaO19.4842 [Candida albicans SC5314]
orf19.6525	2055	915	2123	47.8247	106.052	1.14894	Up	0	0	-	-	-	gi|68469152|ref|XP_721363.1|/0/hypothetical protein CaO19.6525 [Candida albicans SC5314]
orf19.3318	2274	290	672	13.6978	30.336	1.14709	Up	2.90878e-13	1.09577e-12	-	-	-	gi|68475049|ref|XP_718410.1|/0/hypothetical protein CaO19.10828 [Candida albicans SC5314]
orf19.5773	2103	1694	3925	86.5201	191.593	1.14694	Up	9.76996e-13	3.16553e-12	GO:0044424//intracellular part	GO:0008238//exopeptidase activity	GO:0019538//protein metabolic process	gi|68475803|ref|XP_718108.1|/0/hypothetical protein CaO19.5773 [Candida albicans SC5314]
orf19.4570	441	57	132	13.8829	30.7267	1.14619	Up	1.93423e-07	4.06946e-07	-	-	-	gi|68466025|ref|XP_722787.1|/5.71291e-82/hypothetical protein CaO19.12039 [Candida albicans SC5314]
orf19.4149	489	2689	6225	590.643	1306.8	1.14569	Up	0	0	GO:0030529//ribonucleoprotein complex	GO:0005198//structural molecule activity	GO:0010467//gene expression	gi|68489563|ref|XP_711400.1|/3.39005e-88/hypothetical protein CaO19.11625 [Candida albicans SC5314]
orf19.6295	1569	194	449	13.2807	29.3767	1.14534	Up	5.4623e-13	1.8943e-12	-	GO:0046914//transition metal ion binding;GO:0004175//endopeptidase activity	GO:0019538//protein metabolic process	gi|68490062|ref|XP_711152.1|/0/hypothetical protein CaO19.6295 [Candida albicans SC5314]
orf19.5848	1866	501	1159	28.8382	63.7605	1.14468	Up	5.88418e-14	2.57338e-13	-	GO:0046914//transition metal ion binding	-	gi|68490744|ref|XP_710814.1|/0/potential zinc finger protein [Candida albicans SC5314]
orf19.4573	2493	182	421	7.84137	17.3356	1.14456	Up	0	0	GO:0043231//intracellular membrane-bounded organelle	GO:0046914//transition metal ion binding;GO:0003676//nucleic acid binding;GO:0001071//nucleic acid binding transcription factor activity	GO:0006351//transcription, DNA-dependent	gi|68466031|ref|XP_722790.1|/0/hypothetical protein CaO19.12042 [Candida albicans SC5314]
orf19.7104	975	697	1612	76.784	169.723	1.1443	Up	9.65894e-14	4.08401e-13	-	-	-	gi|68471237|ref|XP_720395.1|/9.35821e-76/hypothetical protein CaO19.7104 [Candida albicans SC5314]
orf19.5862	1257	126	291	10.7666	23.765	1.14228	Up	1.39444e-13	5.66109e-13	-	GO:0016813//hydrolase activity, acting on carbon-nitrogen (but not peptide) bonds, in linear amidines;GO:0043169//cation binding	-	gi|68465433|ref|XP_723078.1|/0/arginase family protein [Candida albicans SC5314]
orf19.2478	1143	26	60	2.44326	5.38871	1.14113	Up	0.000497964	0.000818428	-	-	-	gi|68474916|ref|XP_718499.1|/0/hypothetical protein CaO19.2478 [Candida albicans SC5314]
orf19.2329.1	414	1584	3655	410.958	906.29	1.14098	Up	6.75792e-12	1.84208e-11	GO:0030529//ribonucleoprotein complex	GO:0005198//structural molecule activity	GO:0010467//gene expression	gi|238878510|gb|EEQ42148.1|/7.68523e-71/40S ribosomal protein S17-B [Candida albicans WO-1]
orf19.5323	1029	807	1861	84.2366	185.657	1.14012	Up	8.00248e-13	2.64614e-12	-	GO:0016615//malate dehydrogenase activity	GO:0009060//aerobic respiration;GO:0005975//carbohydrate metabolic process;GO:0043648//dicarboxylic acid metabolic process	gi|68477627|ref|XP_717126.1|/1.62327e-174/potential peroxisomal malate dehydrogenase [Candida albicans SC5314]
orf19.7452	2211	85	196	4.12927	9.10013	1.14	Up	2.55908e-10	6.22859e-10	-	-	-	gi|68479891|ref|XP_716113.1|/0/hypothetical protein CaO19.7452 [Candida albicans SC5314]
orf19.2149	2274	734	1692	34.6696	76.3818	1.13956	Up	1.48237e-12	4.62409e-12	GO:0031224//intrinsic to membrane	-	GO:0006810//transport	gi|68487451|ref|XP_712424.1|/0/potential sulfate transporter [Candida albicans SC5314]
orf19.4529	507	110	253	23.3038	51.2263	1.13632	Up	7.30082e-13	2.43786e-12	-	-	GO:0009987//cellular process	gi|68486311|ref|XP_712954.1|/9.93212e-57/hypothetical protein CaO19.4529 [Candida albicans SC5314]
orf19.329	1368	490	1125	38.4727	84.4202	1.13375	Up	0	0	GO:0043231//intracellular membrane-bounded organelle	GO:0046914//transition metal ion binding;GO:0003676//nucleic acid binding	GO:0006396//RNA processing	gi|74586892|sp|Q5AED9.1|BBP_CANAL/0/RecName: Full=Branchpoint-bridging protein
orf19.2994	609	5260	12062	927.708	2033.21	1.13202	Up	2.49028e-11	6.36787e-11	GO:0030529//ribonucleoprotein complex	GO:0005198//structural molecule activity	GO:0010467//gene expression	gi|68468867|ref|XP_721492.1|/5.70188e-99/likely cytosolic ribosomal protein L13 [Candida albicans SC5314]
orf19.4193.1	456	783	1795	184.433	404.091	1.13158	Up	0	0	GO:0030529//ribonucleoprotein complex	GO:0005198//structural molecule activity	GO:0010467//gene expression	gi|241956276|ref|XP_002420858.1|/5.97723e-80/ribosomal protein, small subunit, putative [Candida dubliniensis CD36]
orf19.4812	408	31	71	8.16102	17.864	1.13023	Up	0.000167701	0.000286323	GO:0044424//intracellular part	GO:0046872//metal ion binding;GO:0016780//phosphotransferase activity, for other substituted phosphate groups	GO:0009058//biosynthetic process;GO:0006631//fatty acid metabolic process	gi|68464841|ref|XP_723498.1|/7.47013e-74/hypothetical protein CaO19.4812 [Candida albicans SC5314]
orf19.3453	2961	727	1664	26.3717	57.6893	1.12931	Up	1.95532e-12	6.01653e-12	GO:0044464//cell part	-	GO:0023052//signaling	gi|68487159|ref|XP_712523.1|/0/hypothetical protein CaO19.10957 [Candida albicans SC5314]
orf19.4905	1554	162	370	11.1971	24.4417	1.12621	Up	0	0	-	-	-	gi|68465019|ref|XP_723587.1|/0/hypothetical protein CaO19.4905 [Candida albicans SC5314]
orf19.5934	1890	99	226	5.62621	12.2751	1.1255	Up	1.78479e-11	4.6435e-11	GO:0043232	GO:0003916//DNA topoisomerase activity	GO:0006261//DNA-dependent DNA replication	gi|68465569|ref|XP_723146.1|/0/likely DNA topoisomerase III [Candida albicans SC5314]
orf19.554	1164	29	66	2.67601	5.82064	1.1211	Up	0.000314648	0.00052778	-	GO:0016491//oxidoreductase activity;GO:0005506//iron ion binding	GO:0008152//metabolic process	gi|68477067|ref|XP_717511.1|/0/potential dityrosine synthesis cytochrome P450 [Candida albicans SC5314]
orf19.1263	2283	272	619	12.7969	27.8333	1.12101	Up	7.13652e-13	2.40004e-12	GO:0031224//intrinsic to membrane	GO:0046914//transition metal ion binding;GO:0003824//catalytic activity;GO:0050662//coenzyme binding	GO:0008152//metabolic process	gi|68478818|ref|XP_716571.1|/0/likely ferric reductase [Candida albicans SC5314]
orf19.4177	1170	243	553	22.3081	48.5198	1.12101	Up	1.05471e-13	4.42892e-13	-	GO:0008483//transaminase activity;GO:0048037//cofactor binding;GO:0016846//carbon-sulfur lyase activity	GO:0008652//cellular amino acid biosynthetic process;GO:0006547//histidine metabolic process	gi|238881767|gb|EEQ45405.1|/0/histidinol-phosphate aminotransferase [Candida albicans WO-1]
orf19.3256	4122	996	2266	25.9534	56.4329	1.12061	Up	9.19042e-13	3.00483e-12	GO:0016020//membrane	GO:0004673//protein histidine kinase activity;GO:0004871//signal transducer activity	GO:0044238//primary metabolic process;GO:0044260;GO:0016310//phosphorylation;GO:0007165//signal transduction	gi|68476011|ref|XP_717946.1|/0/potential response regulator protein [Candida albicans SC5314]
orf19.7668	1713	73	166	4.57729	9.94789	1.1199	Up	9.79504e-09	2.21721e-08	-	GO:0004558//alpha-glucosidase activity;GO:0043167//ion binding	GO:0044238//primary metabolic process	gi|68473243|ref|XP_719427.1|/0/maltase involved in sucrose utilization [Candida albicans SC5314]
orf19.3501	3141	471	1071	16.1063	35.0027	1.11984	Up	2.0095e-13	7.82553e-13	-	GO:0046872//metal ion binding	-	gi|189093912|ref|XP_443846.1|/0/hypothetical protein CaO19.3501 [Candida albicans SC5314]
orf19.5379	1410	806	1830	61.3986	133.233	1.11767	Up	0	0	GO:0044464//cell part	GO:0016628//oxidoreductase activity, acting on the CH-CH group of donors, NAD or NADP as acceptor	GO:0008152//metabolic process	gi|68476213|ref|XP_717756.1|/0/sterol C-24 (28) reductase [Candida albicans SC5314]
orf19.3789	468	3902	8846	895.538	1940.35	1.11549	Up	1.02858e-11	2.74497e-11	GO:0030529//ribonucleoprotein complex	-	-	gi|68477285|ref|XP_717269.1|/1.02898e-56/likely cytosolic ribosomal protein L24 [Candida albicans SC5314]
orf19.731	1398	293	663	22.5114	48.684	1.11279	Up	5.691e-13	1.96803e-12	GO:0044464//cell part	-	-	gi|68485989|ref|XP_713113.1|/0/potential COPII-coated vesicle integral membrane protein [Candida albicans SC5314]
orf19.4593	3531	2946	6658	89.6144	193.565	1.11101	Up	0	0	GO:0044464//cell part	GO:0046914//transition metal ion binding	GO:0023052//signaling	gi|68466071|ref|XP_722810.1|/0/hypothetical protein CaO19.12062 [Candida albicans SC5314]
orf19.5982	561	3082	6960	590.082	1273.58	1.1099	Up	0	0	GO:0030529//ribonucleoprotein complex	GO:0005198//structural molecule activity	GO:0010467//gene expression	gi|238880912|gb|EEQ44550.1|/2.18166e-88/conserved hypothetical protein [Candida albicans WO-1]
orf19.4457	4968	2029	4580	43.8675	94.6377	1.10926	Up	0	0	-	-	-	gi|68488329|ref|XP_711953.1|/0/possible bud neck localizing protein phosphatase subunit Bni4p [Candida albicans SC5314]
orf19.1159	1521	277	625	19.5611	42.1824	1.10865	Up	5.9286e-14	2.5891e-13	GO:0044424//intracellular part	GO:0016413//O-acetyltransferase activity	-	gi|68486083|ref|XP_713058.1|/0/potential serine O-trans-acetylase [Candida albicans SC5314]
orf19.6323	459	129	291	30.187	65.0819	1.10833	Up	0	0	-	GO:0016407//acetyltransferase activity	-	gi|68491393|ref|XP_710494.1|/2.57316e-86/potential histone N-acetyl tranferase (GNAT family) [Candida albicans SC5314]
orf19.2930	1947	419	945	23.1148	49.8248	1.10805	Up	0	0	-	GO:0008135//translation factor activity, nucleic acid binding	GO:0006412//translation	gi|68468743|ref|XP_721430.1|/0/hypothetical protein CaO19.2930 [Candida albicans SC5314]
orf19.4811	987	202	455	21.9825	47.3232	1.10619	Up	0	0	GO:0044464//cell part	GO:0015075//ion transmembrane transporter activity	GO:0006811//ion transport	gi|68464839|ref|XP_723497.1|/0/hypothetical protein CaO19.4811 [Candida albicans SC5314]
orf19.5940	2151	236	531	11.7846	25.3416	1.10461	Up	5.29132e-13	1.84547e-12	GO:0043231//intracellular membrane-bounded organelle	GO:0046914//transition metal ion binding;GO:0001071//nucleic acid binding transcription factor activity	GO:0006351//transcription, DNA-dependent	gi|68465581|ref|XP_723152.1|/0/potential fungal zinc cluster transcription factor [Candida albicans SC5314]
orf19.4332	1593	132	297	8.90022	19.1391	1.10461	Up	1.91624e-13	7.5102e-13	-	-	-	gi|68470783|ref|XP_720637.1|/0/hypothetical protein CaO19.4332 [Candida albicans SC5314]
orf19.6824	1404	80	180	6.1202	13.1609	1.10461	Up	3.49034e-09	8.1048e-09	-	-	-	gi|68472243|ref|XP_719917.1|/4.91078e-170/potential helix-loop-helix DNA binding protein [Candida albicans SC5314]
orf19.6264.4	156	990	2226	681.637	1464.81	1.10364	Up	7.24976e-13	2.42346e-12	GO:0030529//ribonucleoprotein complex	GO:0005198//structural molecule activity	GO:0010467//gene expression	gi|51701838|sp|Q96W55.1|RL39_CANAL/2.05778e-23/RecName: Full=60S ribosomal protein L39; AltName: Full=L46
orf19.3757	345	170	382	52.9264	113.664	1.10272	Up	3.90354e-13	1.41808e-12	GO:0005753//mitochondrial proton-transporting ATP synthase complex	GO:0015077//monovalent inorganic cation transmembrane transporter activity;GO:0003824//catalytic activity	GO:0006754//ATP biosynthetic process	gi|68490784|ref|XP_710787.1|/2.56161e-53/hypothetical protein CaO19.3757 [Candida albicans SC5314]
orf19.4242	3687	1103	2477	32.1325	68.9657	1.10184	Up	2.61346e-12	7.88682e-12	-	GO:0004672//protein kinase activity;GO:0032559	GO:0006464//protein modification process	gi|68470348|ref|XP_720678.1|/0/likely signal transduction kinase [Candida albicans SC5314]
orf19.6828.1	207	155	348	80.4274	172.579	1.1015	Up	3.9746e-13	1.43621e-12	GO:0044464//cell part	GO:0008320//protein transmembrane transporter activity	GO:0006886//intracellular protein transport	gi|238881069|gb|EEQ44707.1|/2.05561e-23/conserved hypothetical protein [Candida albicans WO-1]
orf19.7481	1014	1228	2757	130.078	279.112	1.10147	Up	7.42296e-12	2.00992e-11	-	GO:0016615//malate dehydrogenase activity	GO:0009060//aerobic respiration;GO:0005975//carbohydrate metabolic process;GO:0043648//dicarboxylic acid metabolic process	gi|68474530|ref|XP_718638.1|/0/likely malate dehydrogenase [Candida albicans SC5314]
orf19.2160	1746	41	92	2.52222	5.40908	1.10069	Up	2.6694e-05	4.87331e-05	-	-	GO:0006810//transport	gi|68487473|ref|XP_712435.1|/0/potential polyamine transporter [Candida albicans SC5314]
orf19.6165	2991	4603	10327	165.298	354.436	1.10046	Up	1.37037e-11	3.60984e-11	-	GO:0016624//oxidoreductase activity, acting on the aldehyde or oxo group of donors, disulfide as acceptor;GO:0019842//vitamin binding	GO:0006007//glucose catabolic process	gi|238880525|gb|EEQ44163.1|/0/2-oxoglutarate dehydrogenase E1 component, mitochondrial precursor [Candida albicans WO-1]
orf19.2785	525	333	747	68.1283	146.063	1.10027	Up	5.22916e-13	1.82796e-12	GO:0005753//mitochondrial proton-transporting ATP synthase complex;GO:0033177//proton-transporting two-sector ATPase complex, proton-transporting domain	GO:0015077//monovalent inorganic cation transmembrane transporter activity;GO:0003824//catalytic activity	GO:0006818//hydrogen transport;GO:0006754//ATP biosynthetic process	gi|238878810|gb|EEQ42448.1|/2.83654e-81/ATP synthase D chain, mitochondrial [Candida albicans WO-1]
orf19.3060	828	347	778	45.0134	96.456	1.09952	Up	1.40998e-13	5.7204e-13	GO:0005789//endoplasmic reticulum membrane	GO:0004576//oligosaccharyl transferase activity	GO:0006487//protein N-linked glycosylation	gi|68468999|ref|XP_721558.1|/2.58661e-150/hypothetical protein CaO19.3060 [Candida albicans SC5314]
orf19.7578	777	248	556	34.2826	73.4571	1.09943	Up	1.87406e-13	7.38748e-13	-	GO:0030246//carbohydrate binding;GO:0003824//catalytic activity	-	gi|68473069|ref|XP_719340.1|/3.80432e-137/potential ER to Golgi transport protein [Candida albicans SC5314]
orf19.3392	723	425	952	63.1384	135.17	1.09818	Up	1.80322e-12	5.56252e-12	-	GO:0019203//carbohydrate phosphatase activity	-	gi|68478401|ref|XP_716702.1|/3.12199e-135/hypothetical protein CaO19.3392 [Candida albicans SC5314]
orf19.3010	864	55	123	6.83741	14.6141	1.09584	Up	1.26383e-06	2.5343e-06	GO:0044424//intracellular part	-	GO:0006633//fatty acid biosynthetic process;GO:0043412//macromolecule modification	gi|68468899|ref|XP_721508.1|/6.37482e-147/hypothetical protein CaO19.3010 [Candida albicans SC5314]
orf19.5639	2517	1065	2381	45.4474	97.1083	1.0954	Up	3.2192e-12	9.54057e-12	-	GO:0046914//transition metal ion binding;GO:0016616//oxidoreductase activity, acting on the CH-OH group of donors, NAD or NADP as acceptor;GO:0016462//pyrophosphatase activity;GO:0019238//cyclohydrolase activity;GO:0000166//nucleotide binding	GO:0006547//histidine metabolic process	gi|68485379|ref|XP_713367.1|/0/hypothetical protein CaO19.13084 [Candida albicans SC5314]
orf19.5225.2	411	2807	6269	733.573	1565.8	1.09389	Up	0	0	GO:0030529//ribonucleoprotein complex	GO:0005198//structural molecule activity	GO:0010467//gene expression	gi|15214261|sp|Q9P843.1|RL27_CANAL/2.03308e-63/RecName: Full=60S ribosomal protein L27
orf19.276	1413	189	422	14.3669	30.6585	1.09354	Up	3.51718e-13	1.29699e-12	-	GO:0016413//O-acetyltransferase activity	GO:0044281//small molecule metabolic process	gi|68471599|ref|XP_720106.1|/0/hypothetical protein CaO19.7908 [Candida albicans SC5314]
orf19.4375.1	192	521	1163	291.46	621.811	1.09318	Up	0	0	GO:0030529//ribonucleoprotein complex	GO:0005198//structural molecule activity	GO:0010467//gene expression	gi|241958438|ref|XP_002421938.1|/8.18336e-20/ribosomal protein, small subunit, putative [Candida dubliniensis CD36]
orf19.3590	867	6934	15460	859.028	1830.5	1.09146	Up	4.88854e-12	1.37608e-11	GO:0044424//intracellular part	GO:0046872//metal ion binding;GO:0016462//pyrophosphatase activity	GO:0006793//phosphorus metabolic process	gi|85700424|sp|P83777.2|IPYR_CANAL/1.05477e-157/RecName: Full=Inorganic pyrophosphatase; AltName: Full=Pyrophosphate phospho-hydrolase; Short=PPase
orf19.6112	768	523	1166	73.1448	155.854	1.09137	Up	5.28244e-13	1.84343e-12	-	-	-	gi|68473934|ref|XP_719070.1|/1.31863e-41/CTA210 antisense protein [Candida albicans SC5314]
orf19.6867	390	118	263	32.4983	69.2263	1.09096	Up	1.43507e-12	4.488e-12	-	GO:0005506//iron ion binding	-	gi|238882324|gb|EEQ45962.1|/6.44958e-65/conserved hypothetical protein [Candida albicans WO-1]
orf19.1418	2679	355	791	14.2331	30.3099	1.09054	Up	5.14478e-13	1.80053e-12	GO:0043234//protein complex	-	GO:0006887//exocytosis	gi|238881431|gb|EEQ45069.1|/0/conserved hypothetical protein [Candida albicans WO-1]
orf19.7091	837	238	529	30.5418	64.8799	1.08699	Up	7.6894e-13	2.55783e-12	-	-	-	gi|68471211|ref|XP_720382.1|/3.79001e-133/hypothetical protein CaO19.7091 [Candida albicans SC5314]
orf19.1517	1116	312	693	30.0285	63.7454	1.08599	Up	2.1605e-13	8.30251e-13	-	GO:0016765//transferase activity, transferring alkyl or aryl (other than methyl) groups	GO:0008652//cellular amino acid biosynthetic process	gi|241950880|ref|XP_002418162.1|/0/3-deoxy-d-arabino-heptulosonate 7-phosphate synthase, putative; dahp synthetase, putative; phospho-2-dehydro-3-deoxyheptonate aldolase, phenylalanine-inhibited, putative; phospho-2-keto-3-deoxyheptonate aldolase, putative [Candida dubliniensis CD36]
orf19.4830	333	95	211	30.6424	65.0457	1.08593	Up	2.79096e-10	6.76871e-10	-	-	-	gi|68464877|ref|XP_723516.1|/9.17832e-56/hypothetical protein CaO19.4830 [Candida albicans SC5314]
orf19.3268	504	4678	10385	996.948	2115.22	1.08522	Up	7.76934e-13	2.57602e-12	GO:0015630//microtubule cytoskeleton	-	GO:0010467//gene expression	gi|74586298|sp|Q5A860.1|TCTP_CANAL/1.22088e-83/RecName: Full=Translationally-controlled tumor protein homolog; Short=TCTP
orf19.1389	492	1048	2325	228.791	485.107	1.08427	Up	2.69674e-12	8.09817e-12	-	GO:0005488//binding	-	gi|68482858|ref|XP_714655.1|/2.19387e-50/hypothetical protein CaO19.8967 [Candida albicans SC5314]
orf19.5502	738	276	612	40.1694	85.1285	1.08355	Up	6.4837e-14	2.81544e-13	-	-	-	gi|68491325|ref|XP_710530.1|/3.08144e-93/hypothetical protein CaO19.5502 [Candida albicans SC5314]
orf19.7375	615	46	102	8.03388	17.0257	1.08355	Up	1.24949e-05	2.33979e-05	GO:0032991//macromolecular complex	GO:0005488//binding	-	gi|68478695|ref|XP_716616.1|/7.36959e-102/hypothetical protein CaO19.7375 [Candida albicans SC5314]
orf19.3544	1119	642	1423	61.6237	130.543	1.08297	Up	1.43219e-13	5.80663e-13	-	GO:0016491//oxidoreductase activity;GO:0046914//transition metal ion binding	GO:0008152//metabolic process	gi|68482164|ref|XP_714966.1|/0/hypothetical protein CaO19.11028 [Candida albicans SC5314]
orf19.586	1245	910	2017	78.5082	166.309	1.08295	Up	3.13304e-13	1.17662e-12	-	-	-	gi|68483709|ref|XP_714213.1|/0/hypothetical protein CaO19.586 [Candida albicans SC5314]
orf19.6980	1758	505	1118	30.8543	65.2834	1.08125	Up	0	0	-	GO:0004672//protein kinase activity;GO:0032559	GO:0006464//protein modification process	gi|68482753|ref|XP_714686.1|/0/likely protein kinase [Candida albicans SC5314]
orf19.5285	600	9878	21798	1768.32	3729.46	1.07659	Up	0	0	-	GO:0000166//nucleotide binding;GO:0003824//catalytic activity	-	gi|238879985|gb|EEQ43623.1|/3.93855e-97/protoplast secreted protein 2 precursor [Candida albicans WO-1]
orf19.579	2367	175	386	7.94114	16.7405	1.07593	Up	3.88356e-13	1.41502e-12	-	GO:0016778;GO:0016765//transferase activity, transferring alkyl or aryl (other than methyl) groups;GO:0016832//aldehyde-lyase activity	GO:0009396//folic acid-containing compound biosynthetic process;GO:0006796//phosphate-containing compound metabolic process	gi|68483697|ref|XP_714207.1|/0/likely multifunctional folic acid biosynthesis enzyme [Candida albicans SC5314]
orf19.7644	402	59	130	15.7641	33.1969	1.07441	Up	9.42588e-07	1.90449e-06	-	GO:0003824//catalytic activity;GO:0046914//transition metal ion binding	-	gi|68473195|ref|XP_719403.1|/1.19681e-79/potential anaphase-promoting complex subunit Apc11 [Candida albicans SC5314]
orf19.5269	1392	246	542	18.9819	39.9706	1.07432	Up	3.8125e-13	1.39245e-12	-	-	-	gi|68479189|ref|XP_716400.1|/3.3762e-155/hypothetical protein CaO19.12734 [Candida albicans SC5314]
orf19.5300	1746	486	1070	29.8975	62.91	1.07326	Up	6.70574e-14	2.90155e-13	GO:0043231//intracellular membrane-bounded organelle	GO:0046872//metal ion binding;GO:0005515//protein binding	GO:0044267//cellular protein metabolic process	gi|68477583|ref|XP_717104.1|/0/hypothetical protein CaO19.5300 [Candida albicans SC5314]
orf19.2302	1470	541	1190	39.5296	83.1017	1.07194	Up	0	0	GO:0016020//membrane	-	-	gi|68484146|ref|XP_713965.1|/0/hypothetical protein CaO19.9838 [Candida albicans SC5314]
orf19.5943	1767	482	1060	29.299	61.5814	1.07164	Up	0	0	-	-	-	gi|68465587|ref|XP_723155.1|/0/potential peroxisomal integral membrane protein Pex28 [Candida albicans SC5314]
orf19.4931.1	396	2086	4587	565.799	1189.09	1.07149	Up	0	0	GO:0030529//ribonucleoprotein complex	GO:0005198//structural molecule activity	GO:0010467//gene expression	gi|238878313|gb|EEQ41951.1|/3.18991e-56/conserved hypothetical protein [Candida albicans WO-1]
orf19.827	657	116	255	18.9642	39.8433	1.07105	Up	6.89848e-12	1.87538e-11	-	-	-	gi|241951240|ref|XP_002418342.1|/3.67431e-105/hypothetical protein, fungus-conserved [Candida dubliniensis CD36]
orf19.2051	2889	739	1624	27.4751	57.7057	1.07059	Up	4.67848e-13	1.65534e-12	-	-	-	gi|68472613|ref|XP_719625.1|/0/potential zinc finger protein [Candida albicans SC5314]
orf19.7489	4407	1877	4124	45.7471	96.0629	1.0703	Up	6.31428e-12	1.73274e-11	GO:0044464//cell part	GO:0046914//transition metal ion binding	GO:0023052//signaling	gi|68474546|ref|XP_718646.1|/0/hypothetical protein CaO19.7489 [Candida albicans SC5314]
orf19.331	666	56	123	9.03143	18.9588	1.06984	Up	2.01462e-06	3.99656e-06	-	GO:0005488//binding;GO:0016741	GO:0006730//one-carbon metabolic process	gi|238880758|gb|EEQ44396.1|/2.10772e-124/conserved hypothetical protein [Candida albicans WO-1]
orf19.5597.1	192	855	1876	478.308	1003.02	1.06835	Up	0	0	GO:0005753//mitochondrial proton-transporting ATP synthase complex	GO:0015078//hydrogen ion transmembrane transporter activity;GO:0019829//cation-transporting ATPase activity	GO:0006754//ATP biosynthetic process	gi|241956774|ref|XP_002421107.1|/4.95317e-25/ATP synthase catalytic sector F1 epsilon subunit [Candida dubliniensis CD36]
orf19.6092	3057	3856	8446	135.483	283.619	1.06585	Up	4.43246e-12	1.26341e-11	-	-	-	gi|68473898|ref|XP_719052.1|/0/hypothetical protein CaO19.6092 [Candida albicans SC5314]
orf19.6975	786	5565	12171	760.476	1589.59	1.06368	Up	1.69689e-11	4.42799e-11	GO:0015935//small ribosomal subunit;GO:0030684//preribosome	GO:0005198//structural molecule activity	GO:0000462//maturation of SSU-rRNA from tricistronic rRNA transcript (SSU-rRNA, 5.8S rRNA, LSU-rRNA);GO:0022618//ribonucleoprotein complex assembly	gi|229462742|sp|O42817.2|RSSA_CANAL/7.85397e-130/RecName: Full=40S ribosomal protein S0
orf19.6312	756	894	1955	127.016	265.464	1.0635	Up	9.43912e-13	3.06972e-12	GO:0030529//ribonucleoprotein complex	GO:0003676//nucleic acid binding;GO:0005198//structural molecule activity	GO:0010467//gene expression	gi|68490130|ref|XP_711114.1|/7.38162e-122/likely cytosolic ribosomal protein S3 [Candida albicans SC5314]
orf19.7450	1092	336	734	33.0491	69.0007	1.062	Up	3.15526e-13	1.18424e-12	-	-	-	gi|68479886|ref|XP_716111.1|/1.31423e-161/hypothetical protein CaO19.7450 [Candida albicans SC5314]
orf19.5201.1	252	939	2051	400.228	835.498	1.06181	Up	0	0	-	-	-	gi|241948717|ref|XP_002417081.1|/9.86968e-26/conserved hypothetical protein [Candida dubliniensis CD36]
orf19.6587	780	120	262	16.5245	34.4816	1.06121	Up	4.94182e-12	1.38852e-11	-	-	-	gi|68469272|ref|XP_721423.1|/1.20247e-106/hypothetical protein CaO19.6587 [Candida albicans SC5314]
orf19.1253	1980	982	2141	53.2708	111.002	1.05917	Up	2.85328e-13	1.07885e-12	-	-	-	gi|68478798|ref|XP_716561.1|/0/hypothetical protein CaO19.1253 [Candida albicans SC5314]
orf19.2958	2529	106	231	4.50194	9.37655	1.05851	Up	9.94562e-11	2.46384e-10	-	-	-	gi|68468797|ref|XP_721457.1|/0/hypothetical protein CaO19.2958 [Candida albicans SC5314]
orf19.405	1251	1005	2186	86.2882	179.38	1.05578	Up	1.39355e-12	4.36484e-12	GO:0031224//intrinsic to membrane	GO:0015075//ion transmembrane transporter activity	GO:0006811//ion transport	gi|68488477|ref|XP_711922.1|/0/hypothetical protein CaO19.8035 [Candida albicans SC5314]
orf19.7544	753	120	261	17.1171	35.5816	1.0557	Up	6.69776e-12	1.82895e-11	-	-	-	gi|68473263|ref|XP_719437.1|/9.71393e-42/CTA215 antisense protein [Candida albicans SC5314]
orf19.6581	1341	115	250	9.21111	19.1378	1.05498	Up	1.92788e-11	4.9924e-11	GO:0044464//cell part	GO:0016747//transferase activity, transferring acyl groups other than amino-acyl groups;GO:0046914//transition metal ion binding	-	gi|74587081|sp|Q5AGV7.1|PFA4_CANAL/0/RecName: Full=Palmitoyltransferase PFA4; AltName: Full=Protein fatty acyltransferase 4
orf19.4660	711	4360	9471	658.658	1367.43	1.05387	Up	1.33493e-11	3.52865e-11	GO:0030529//ribonucleoprotein complex	GO:0005198//structural molecule activity	GO:0010467//gene expression	gi|238881698|gb|EEQ45336.1|/3.87878e-114/40S ribosomal protein S6 [Candida albicans WO-1]
orf19.1825	2226	47	102	2.26786	4.70387	1.05252	Up	1.98334e-05	3.65796e-05	-	-	-	gi|68490596|ref|XP_710885.1|/0/hypothetical protein CaO19.9384 [Candida albicans SC5314]
orf19.3782.2	264	85	184	34.5826	71.5474	1.04885	Up	1.02644e-08	2.32087e-08	GO:0031224//intrinsic to membrane	-	-	gi|241954782|ref|XP_002420112.1|/6.32416e-44/uncharacterized protein YCL057C homologue, putative [Candida dubliniensis CD36]
orf19.22	735	281	608	41.0641	84.9173	1.04818	Up	0	0	GO:0031224//intrinsic to membrane	-	GO:0050896//response to stimulus	gi|68488641|ref|XP_711829.1|/2.91268e-144/potential peroxisome-related protein [Candida albicans SC5314]
orf19.2552	1965	55	119	3.00637	6.21677	1.04814	Up	4.30612e-06	8.35797e-06	GO:0016020//membrane	GO:0008556//potassium-transporting ATPase activity;GO:0000166//nucleotide binding	GO:0006811//ion transport;GO:0008152//metabolic process	gi|68475395|ref|XP_718220.1|/0/potential cation transporting ATPase Acu1p fragment [Candida albicans SC5314]
orf19.1394	501	62	134	13.2922	27.4566	1.04657	Up	1.09729e-06	2.2105e-06	-	-	-	gi|68482868|ref|XP_714660.1|/3.47448e-91/hypothetical protein CaO19.8972 [Candida albicans SC5314]
orf19.5806	1500	13413	28973	960.456	1982.82	1.04576	Up	0	0	-	GO:0004030//aldehyde dehydrogenase [NAD(P)+] activity	GO:0008152//metabolic process	gi|238882092|gb|EEQ45730.1|/0/aldehyde dehydrogenase, mitochondrial precursor [Candida albicans WO-1]
orf19.967	963	195	421	21.7496	44.8782	1.04503	Up	2.11608e-13	8.16775e-13	-	GO:0043169//cation binding;GO:0003824//catalytic activity	-	gi|68478247|ref|XP_716865.1|/4.88236e-178/hypothetical protein CaO19.8582 [Candida albicans SC5314]
orf19.5838	906	57	123	6.75755	13.9366	1.04431	Up	3.17326e-06	6.20842e-06	-	GO:0016791//phosphatase activity	GO:0006796//phosphate-containing compound metabolic process;GO:0006563//L-serine metabolic process	gi|68481478|ref|XP_715378.1|/1.64001e-164/hypothetical protein CaO19.5838 [Candida albicans SC5314]
orf19.5919	1890	51	110	2.89835	5.97463	1.04362	Up	1.07364e-05	2.02163e-05	-	-	-	gi|68465541|ref|XP_723132.1|/0/hypothetical protein CaO19.5919 [Candida albicans SC5314]
orf19.932	5151	1170	2520	24.397	50.2214	1.0416	Up	3.19856e-12	9.49781e-12	GO:0031224//intrinsic to membrane	GO:0042625//ATPase activity, coupled to transmembrane movement of ions;GO:0046872//metal ion binding;GO:0005548//phospholipid transporter activity;GO:0032559	GO:0009206;GO:0006869//lipid transport	gi|68478179|ref|XP_716831.1|/0/hypothetical protein CaO19.8547 [Candida albicans SC5314]
orf19.177	2397	389	837	17.4311	35.8457	1.04014	Up	0	0	-	-	-	gi|68491870|ref|XP_710279.1|/0/possible Bem1-like protein [Candida albicans SC5314]
orf19.1637	942	127	273	14.4809	29.7503	1.03875	Up	4.44334e-12	1.26592e-11	-	-	-	gi|68468309|ref|XP_721714.1|/6.3766e-167/hypothetical protein CaO19.1637 [Candida albicans SC5314]
orf19.3151	1167	47	101	4.32583	8.88445	1.0383	Up	2.6847e-05	4.89685e-05	-	GO:0016616//oxidoreductase activity, acting on the CH-OH group of donors, NAD or NADP as acceptor	GO:0008152//metabolic process	gi|68491655|ref|XP_710383.1|/0/hypothetical protein CaO19.10661 [Candida albicans SC5314]
orf19.2618	1230	209	449	18.2509	37.4732	1.03789	Up	1.65867e-13	6.63253e-13	GO:0044424//intracellular part	GO:0016413//O-acetyltransferase activity	-	gi|68475320|ref|XP_718378.1|/0/potential homoserine O-trans-acetylase [Candida albicans SC5314]
orf19.5433	354	54	116	16.3845	33.6384	1.03778	Up	6.77814e-06	1.29829e-05	GO:0044429//mitochondrial part	-	-	gi|68476311|ref|XP_717805.1|/1.81636e-59/potential mitochondrial protein Fmp16 [Candida albicans SC5314]
orf19.5735	1191	835	1793	75.3039	154.543	1.03721	Up	0	0	GO:0044464//cell part	-	GO:0009987//cellular process	gi|68475733|ref|XP_718073.1|/0/hypothetical protein CaO19.5735 [Candida albicans SC5314]
orf19.6003	1788	355	762	21.3257	43.7489	1.03665	Up	5.14478e-13	1.7995e-12	-	-	-	gi|68465701|ref|XP_723212.1|/4.24481e-132/hypothetical protein CaO19.6003 [Candida albicans SC5314]
orf19.1601	1170	8202	17596	752.968	1543.86	1.03588	Up	0	0	GO:0030529//ribonucleoprotein complex	GO:0005198//structural molecule activity	GO:0010467//gene expression	gi|68491020|ref|XP_710682.1|/0/likely cytosolic ribosomal protein L3 [Candida albicans SC5314]
orf19.5858	537	1030	2208	206.018	422.09	1.03478	Up	3.25628e-12	9.63178e-12	GO:0044424//intracellular part	-	GO:0006810//transport	gi|68465425|ref|XP_723074.1|/7.49428e-72/potential nascent polypeptide-associated complex alpha subunit [Candida albicans SC5314]
orf19.1960	1398	259	555	19.8992	40.7536	1.03422	Up	2.07168e-13	8.03696e-13	-	-	GO:0009987//cellular process	gi|68480684|ref|XP_715723.1|/0/hypothetical protein CaO19.1960 [Candida albicans SC5314]
orf19.1372	720	295	632	44.0081	90.1083	1.03389	Up	4.00568e-13	1.44233e-12	GO:0044464//cell part	-	-	gi|308154211|sp|C4YKP5.1|IR221_CANAW/7.18621e-108/RecName: Full=Increased recombination centers protein 22-1; Flags: Precursor
orf19.4579	927	795	1703	92.115	188.588	1.03373	Up	5.04042e-14	2.22667e-13	-	-	-	gi|68466043|ref|XP_722796.1|/1.53951e-141/hypothetical protein CaO19.12048 [Candida albicans SC5314]
orf19.7328	2706	2459	5267	97.6053	199.809	1.03359	Up	0	0	GO:0031332	GO:0016787//hydrolase activity;GO:0005488//binding	GO:0016458//gene silencing	gi|68479056|ref|XP_716462.1|/0/p100-like potential TFIIE-interacting transcriptional coactivator [Candida albicans SC5314]
orf19.250	882	230	492	28.0093	57.2633	1.03171	Up	4.84724e-13	1.70714e-12	GO:0044464//cell part	GO:0016411//acylglycerol O-acyltransferase activity	GO:0006644//phospholipid metabolic process	gi|68471547|ref|XP_720080.1|/5.39437e-157/potential fatty acyltransferase [Candida albicans SC5314]
orf19.3207	2082	398	851	20.5327	41.9594	1.03107	Up	7.92478e-13	2.62329e-12	-	-	GO:0009987//cellular process	gi|74656257|sp|Q59YH3.1|CG11_CANAL/0/RecName: Full=G1/S-specific cyclin CCN1
orf19.1653	591	841	1798	152.845	312.307	1.0309	Up	1.18772e-12	3.76839e-12	GO:0031224//intrinsic to membrane	-	-	gi|68468341|ref|XP_721730.1|/2.6131e-114/hypothetical protein CaO19.1653 [Candida albicans SC5314]
orf19.7595	1329	141	301	11.3956	23.2499	1.02875	Up	5.5489e-13	1.92215e-12	-	-	-	gi|68473103|ref|XP_719357.1|/0/potential dynactin-like protein [Candida albicans SC5314]
orf19.362	678	113	241	17.9016	36.4895	1.02739	Up	1.13984e-10	2.81803e-10	-	-	-	gi|68491690|ref|XP_710347.1|/9.97747e-77/CTA2 subfamily 1 protein 2 [Candida albicans SC5314]
orf19.244	699	114	243	17.5174	35.6869	1.0266	Up	9.79896e-11	2.42947e-10	-	-	-	gi|68471533|ref|XP_720073.1|/6.57795e-127/hypothetical protein CaO19.7874 [Candida albicans SC5314]
orf19.562	1827	374	797	21.9875	44.7816	1.02622	Up	5.44676e-13	1.89106e-12	-	GO:0046914//transition metal ion binding	-	gi|68491774|ref|XP_710329.1|/0/non-LTR retrotransposon Zorro 3 orf1-related protein [Candida albicans SC5314]
orf19.7425	1068	381	811	38.3174	77.9524	1.02459	Up	3.49276e-13	1.29032e-12	GO:0044424//intracellular part	GO:0019104//DNA N-glycosylase activity	GO:0006281//DNA repair	gi|238881037|gb|EEQ44675.1|/0/uracil-DNA glycosylase [Candida albicans WO-1]
orf19.871	3060	1220	2593	42.8234	86.9884	1.02242	Up	7.95964e-12	2.14573e-11	-	-	-	gi|68469968|ref|XP_720994.1|/0/hypothetical protein CaO19.871 [Candida albicans SC5314]
orf19.3135	1782	1473	3128	88.7846	180.194	1.02116	Up	7.40164e-12	2.00503e-11	-	-	-	gi|238881222|gb|EEQ44860.1|/0/conserved hypothetical protein [Candida albicans WO-1]
orf19.7118	669	578	1227	92.7993	188.278	1.02068	Up	4.36318e-13	1.55912e-12	GO:0044424//intracellular part	GO:0019205//nucleobase-containing compound kinase activity;GO:0016776//phosphotransferase activity, phosphate group as acceptor;GO:0032559	GO:0009117//nucleotide metabolic process;GO:0006796//phosphate-containing compound metabolic process	gi|68471263|ref|XP_720408.1|/5.79728e-122/potential mitochondrial adenylate kinase [Candida albicans SC5314]
orf19.5418	1434	514	1091	38.4996	78.1008	1.02049	Up	2.0095e-13	7.84051e-13	-	GO:0003824//catalytic activity	-	gi|68476281|ref|XP_717790.1|/0/hypothetical protein CaO19.5418 [Candida albicans SC5314]
orf19.3504	414	1167	2477	302.77	614.194	1.02047	Up	3.73834e-12	1.08943e-11	GO:0030529//ribonucleoprotein complex	GO:0005198//structural molecule activity	GO:0010467//gene expression	gi|255727366|ref|XP_002548609.1|/1.40058e-72/60S ribosomal protein L23 [Candida tropicalis MYA-3404]
orf19.1448.1	276	41	87	15.9558	32.3586	1.02007	Up	0.00012417	0.000214093	GO:0005875//microtubule associated complex	GO:0017111//nucleoside-triphosphatase activity	GO:0009987//cellular process;GO:0051234//establishment of localization	gi|241950777|ref|XP_002418111.1|/2.54107e-45/dynein light chain 1, cytoplasmic, putative [Candida dubliniensis CD36]
orf19.7341	981	1057	2241	115.731	234.505	1.01885	Up	3.81606e-12	1.10943e-11	-	-	-	gi|68479082|ref|XP_716475.1|/3.02662e-90/hypothetical protein CaO19.7341 [Candida albicans SC5314]
orf19.4099	4314	334	708	8.3159	16.8474	1.01858	Up	3.66818e-13	1.34617e-12	-	GO:0016668//oxidoreductase activity, acting on a sulfur group of donors, NAD or NADP as acceptor;GO:0051540;GO:0016673;GO:0005506//iron ion binding;GO:0000166//nucleotide binding;GO:0016664	GO:0008152//metabolic process	gi|238882380|gb|EEQ46018.1|/0/sulfite reductase beta subunit [Candida albicans WO-1]
orf19.5311	2529	789	1669	33.5097	67.7466	1.01557	Up	0	0	-	-	-	gi|238881443|gb|EEQ45081.1|/0/conserved hypothetical protein [Candida albicans WO-1]
orf19.7217	1092	6441	13611	633.539	1279.52	1.0141	Up	8.1557e-13	2.69244e-12	GO:0030529//ribonucleoprotein complex	GO:0005198//structural molecule activity	GO:0010467//gene expression	gi|68482001|ref|XP_715018.1|/0/likely cytosolic ribosomal protein L4 [Candida albicans SC5314]
orf19.5702	4803	612	1292	13.6862	27.614	1.01268	Up	1.1755e-12	3.75106e-12	-	-	-	gi|68475677|ref|XP_718045.1|/0/acyl CoA ligase-like protein [Candida albicans SC5314]
orf19.2213	1365	54	114	4.24917	8.57338	1.01268	Up	1.22817e-05	2.30198e-05	-	-	-	gi|68480013|ref|XP_716053.1|/0/hypothetical protein CaO19.2213 [Candida albicans SC5314]
orf19.1728	633	45	95	7.63575	15.4064	1.01268	Up	6.65652e-05	0.00011776	-	-	-	gi|68468479|ref|XP_721799.1|/8.62088e-93/hypothetical protein CaO19.1728 [Candida albicans SC5314]
orf19.6229	1458	2451	5170	180.563	364.01	1.01148	Up	0	0	-	GO:0005506//iron ion binding;GO:0004601//peroxidase activity	GO:0042743//hydrogen peroxide metabolic process;GO:0006950//response to stress	gi|2317282|dbj|BAA21767.1|/0/catalase [Candida albicans]
orf19.2246	771	513	1082	71.467	144.063	1.01135	Up	0	0	-	-	-	gi|68482408|ref|XP_714836.1|/1.58566e-111/hypothetical protein CaO19.2246 [Candida albicans SC5314]
orf19.2397.3	1017	202	426	21.334	43	1.01118	Up	0	0	-	-	-	gi|238879786|gb|EEQ43424.1|/0/conserved hypothetical protein [Candida albicans WO-1]
orf19.4264	906	83	175	9.83995	19.8285	1.01085	Up	6.05152e-08	1.31063e-07	-	-	-	gi|68470392|ref|XP_720700.1|/4.79388e-148/hypothetical protein CaO19.11740 [Candida albicans SC5314]
orf19.5576	1665	686	1445	44.254	89.091	1.00947	Up	0	0	-	GO:0016301//kinase activity;GO:0032559	GO:0009108//coenzyme biosynthetic process	gi|241956652|ref|XP_002421046.1|/0/pantothenate kinase, putative; pantothenic acid kinase, putative [Candida dubliniensis CD36]
orf19.4910	753	2143	4504	305.682	614.021	1.00626	Up	0	0	-	-	-	gi|68465029|ref|XP_723592.1|/1.10982e-69/hypothetical protein CaO19.4910 [Candida albicans SC5314]
orf19.7566	1716	268	562	16.7749	33.6201	1.00302	Up	1.55653e-13	6.25683e-13	GO:0031224//intrinsic to membrane	GO:0005275//amine transmembrane transporter activity	GO:0006865//amino acid transport	gi|68473045|ref|XP_719328.1|/0/potential glutamine permease [Candida albicans SC5314]
orf19.5654	1338	1855	3889	148.912	298.375	1.00266	Up	4.13226e-12	1.18948e-11	GO:0044464//cell part	GO:0004175//endopeptidase activity	GO:0019538//protein metabolic process	gi|68485409|ref|XP_713382.1|/0/potential a-factor pheromone maturation protease [Candida albicans SC5314]
orf19.699	378	164	0	46.601	0.001	-15.5081	Down	9.7847e-52	6.90008e-51	-	-	-	gi|68488729|ref|XP_711790.1|/3.34927e-58/hypothetical protein CaO19.8318 [Candida albicans SC5314]
orf19.823	669	23	0	3.6927	0.001	-11.8505	Down	6.88156e-08	1.48409e-07	-	-	-	gi|238882183|gb|EEQ45821.1|/6.86402e-115/conserved hypothetical protein [Candida albicans WO-1]
orf19.2023	1641	83705	55	5478.8	3.4406	-10.637	Down	0	0	GO:0031224//intrinsic to membrane	GO:0022857//transmembrane transporter activity	GO:0006810//transport	gi|68472814|ref|XP_719472.1|/0/potential hexose transporter [Candida albicans SC5314]
orf19.508	1530	3655	3	256.589	0.201284	-10.316	Down	0	0	-	-	GO:0006810//transport	gi|68476965|ref|XP_717460.1|/0/potential quinidine/multidrug transporter [Candida albicans SC5314]
orf19.1979	1608	605	1	40.4122	0.0638402	-9.30611	Down	2.2083e-186	2.22798e-185	GO:0031224//intrinsic to membrane	-	GO:0006810//transport	gi|68480721|ref|XP_715741.1|/0/potential glycerophosphoinositol permease [Candida albicans SC5314]
orf19.2356	1554	1162	3	80.3152	0.198176	-8.66275	Down	0	0	GO:0044464//cell part	GO:0046914//transition metal ion binding	-	gi|68486931|ref|XP_712647.1|/3.88154e-171/potential zinc finger protein [Candida albicans SC5314]
orf19.2020	1653	13847	36	899.758	2.23568	-8.65268	Down	0	0	GO:0031224//intrinsic to membrane	GO:0022857//transmembrane transporter activity	GO:0006810//transport	gi|68472555|ref|XP_719596.1|/0/potential hexose transporter [Candida albicans SC5314]
orf19.1691	588	1025	3	187.236	0.52375	-8.48176	Down	0	0	GO:0031224//intrinsic to membrane	-	-	gi|68468413|ref|XP_721766.1|/1.23981e-108/hypothetical protein CaO19.1691 [Candida albicans SC5314]
orf19.2669	4344	11	0	0.271985	0.001	-8.08739	Down	0.000370986	0.000619053	-	-	-	gi|68470830|ref|XP_720422.1|/0/retrotransposon TCA4 polyprotein [Candida albicans SC5314]
orf19.4555	6303	203948	938	3475.48	15.2769	-7.82972	Down	0	0	-	-	-	gi|68491558|ref|XP_710425.1|/0/agglutinin-like ALS4 protein fragment [Candida albicans SC5314]
orf19.1189	2055	14900	73	778.784	3.64663	-7.73852	Down	0	0	-	-	-	gi|68487652|ref|XP_712307.1|/0/hypothetical protein CaO19.1189 [Candida albicans SC5314]
orf19.347	843	2317	12	295.217	1.46128	-7.6584	Down	0	0	-	-	-	gi|68471737|ref|XP_720175.1|/4.66059e-155/hypothetical protein CaO19.7980 [Candida albicans SC5314]
orf19.54	1965	3143	18	171.801	0.940351	-7.51332	Down	0	0	-	-	-	gi|68490636|ref|XP_710865.1|/0/hypothetical WRY family protein 7 [Candida albicans SC5314]
orf19.5288	1308	15981	97	1312.32	7.61279	-7.42948	Down	0	0	-	GO:0016616//oxidoreductase activity, acting on the CH-OH group of donors, NAD or NADP as acceptor;GO:0046914//transition metal ion binding	GO:0008152//metabolic process	gi|68491685|ref|XP_710369.1|/0/potential butanediol dehydrogenase [Candida albicans SC5314]
orf19.2529.1	189	7351	50	4177.61	27.1574	-7.26519	Down	0	0	-	-	-	-
orf19.1868	1185	7959	70	721.411	6.06401	-6.89441	Down	0	0	-	GO:0046872//metal ion binding;GO:0016728	GO:0009132//nucleoside diphosphate metabolic process	gi|238883648|gb|EEQ47286.1|/0/ribonucleoside-diphosphate reductase small chain 1 [Candida albicans WO-1]
orf19.5079	4473	74147	701	1780.48	16.0879	-6.79015	Down	0	0	GO:0031224//intrinsic to membrane	GO:0017111//nucleoside-triphosphatase activity;GO:0015405;GO:0032559	GO:0009207;GO:0051234//establishment of localization	gi|68476649|ref|XP_717617.1|/0/potential ABC transporter [Candida albicans SC5314]
orf19.2021	1653	14922	150	969.61	9.31534	-6.70165	Down	0	0	GO:0031224//intrinsic to membrane	GO:0022857//transmembrane transporter activity	GO:0006810//transport	gi|238881913|gb|EEQ45551.1|/0/conserved hypothetical protein [Candida albicans WO-1]
orf19.4679	1707	4665	50	293.536	3.00688	-6.60912	Down	0	0	GO:0031224//intrinsic to membrane	GO:0005275//amine transmembrane transporter activity	GO:0006865//amino acid transport	gi|68466237|ref|XP_722893.1|/0/potential carnitine transporter [Candida albicans SC5314]
orf19.3448	342	179	2	56.2173	0.600322	-6.54913	Down	9.21808e-53	6.56869e-52	-	-	-	gi|68478507|ref|XP_716755.1|/1.19597e-42/hypothetical protein CaO19.3448 [Candida albicans SC5314]
orf19.4195.1	453	590	7	139.893	1.58628	-6.46253	Down	1.58906e-170	1.55947e-169	-	GO:0016814//hydrolase activity, acting on carbon-nitrogen (but not peptide) bonds, in cyclic amidines;GO:0046914//transition metal ion binding	-	gi|38677840|emb|CAE82258.1|/7.84824e-72/putative cytosine deaminase [Candida albicans]
orf19.4886	717	564	7	84.4895	1.00221	-6.39751	Down	1.41521e-162	1.3778e-161	-	-	-	gi|68464983|ref|XP_723569.1|/1.99857e-118/hypothetical protein CaO19.4886 [Candida albicans SC5314]
orf19.4456	1824	1367	18	80.4983	1.01304	-6.31219	Down	0	0	GO:0031224//intrinsic to membrane	GO:0005275//amine transmembrane transporter activity	GO:0006865//amino acid transport	gi|68484024|ref|XP_714102.1|/0/potential general amino acid permease [Candida albicans SC5314]
orf19.1097	7089	126409	1666	1915.3	24.1252	-6.31089	Down	0	0	-	-	-	gi|241956914|ref|XP_002421177.1|/0/agglutinin-like protein, putative [Candida dubliniensis CD36]
orf19.85	492	636	10	138.846	2.08648	-6.05627	Down	6.66562e-180	6.66998e-179	-	GO:0004601//peroxidase activity	GO:0008152//metabolic process;GO:0006950//response to stress	gi|68483467|ref|XP_714294.1|/1.35831e-92/potential glutathione peroxidase/redox transducer [Candida albicans SC5314]
orf19.915	2115	934	15	47.4329	0.72805	-6.02571	Down	4.78392e-263	5.27958e-262	-	-	-	gi|68492407|ref|XP_710034.1|/0/Leucine Rich Repeat protein [Candida albicans SC5314]
orf19.1264	2217	405	7	19.6215	0.324125	-5.91974	Down	3.99188e-114	3.5839e-113	GO:0031224//intrinsic to membrane	GO:0046914//transition metal ion binding;GO:0003824//catalytic activity;GO:0050662//coenzyme binding	GO:0008152//metabolic process	gi|68478820|ref|XP_716572.1|/0/likely ferric reductase [Candida albicans SC5314]
orf19.822	570	3477	61	655.198	10.9859	-5.89821	Down	0	0	-	-	-	gi|68469633|ref|XP_721068.1|/2.43374e-90/hypothetical protein CaO19.8442 [Candida albicans SC5314]
orf19.2048	366	1349	24	395.889	6.73148	-5.87803	Down	0	0	-	-	-	gi|68472607|ref|XP_719622.1|/1.37846e-51/hypothetical protein CaO19.9596 [Candida albicans SC5314]
orf19.7284	777	9485	181	1311.17	23.9132	-5.7769	Down	0	0	-	-	-	gi|68478970|ref|XP_716419.1|/5.88284e-130/hypothetical protein CaO19.7284 [Candida albicans SC5314]
orf19.4737	1758	8400	173	513.22	10.102	-5.66686	Down	0	0	-	-	GO:0006810//transport	gi|68465068|ref|XP_723233.1|/0/potential polyamine transporter [Candida albicans SC5314]
orf19.2454	3021	1437	30	51.0915	1.01941	-5.64727	Down	0	0	GO:0044464//cell part	-	GO:0030001//metal ion transport	gi|68474870|ref|XP_718476.1|/0/hypothetical protein CaO19.2454 [Candida albicans SC5314]
orf19.6489	858	1105	28	138.33	3.35005	-5.36779	Down	1.31318e-296	1.47318e-295	-	-	-	gi|68469086|ref|XP_721330.1|/1.60494e-142/potential Sur7 family cortical patch protein [Candida albicans SC5314]
orf19.23	1395	818	22	62.9828	1.61893	-5.28184	Down	2.46222e-218	2.58216e-217	GO:0031224//intrinsic to membrane	-	GO:0050896//response to stimulus	gi|68488643|ref|XP_711830.1|/0/potential phospholipid-translocating ATPase [Candida albicans SC5314]
orf19.4769	1545	303	9	21.0648	0.59799	-5.13857	Down	1.01315e-80	8.18281e-80	-	GO:0003824//catalytic activity	-	gi|238878674|gb|EEQ42312.1|/0/hypothetical protein CAWG_00517 [Candida albicans WO-1]
orf19.5604	1695	368	11	23.3196	0.666198	-5.12945	Down	1.18366e-97	1.0236e-96	GO:0031224//intrinsic to membrane	GO:0022857//transmembrane transporter activity	GO:0015893//drug transport	gi|114215708|gb|ABI54465.1|/0/multidrug efflux pump [Candida albicans]
orf19.5447	1893	5198	172	294.936	9.32734	-4.98279	Down	0	0	GO:0031224//intrinsic to membrane	GO:0022857//transmembrane transporter activity	GO:0071702	gi|68476339|ref|XP_717819.1|/0/potential myo-inositol transporter [Candida albicans SC5314]
orf19.851	2517	241	8	10.2843	0.326277	-4.97821	Down	1.81079e-63	1.36344e-62	-	GO:0003824//catalytic activity	-	gi|68469691|ref|XP_721097.1|/0/hypothetical protein CaO19.8471 [Candida albicans SC5314]
orf19.5863	519	60	2	12.4173	0.395588	-4.97221	Down	1.13021e-16	5.54136e-16	-	-	-	gi|68465435|ref|XP_723079.1|/1.92682e-98/hypothetical protein CaO19.5863 [Candida albicans SC5314]
orf19.84	1701	918	31	57.967	1.87084	-4.95347	Down	4.78966e-237	5.1922e-236	GO:0031224//intrinsic to membrane	GO:0005275//amine transmembrane transporter activity	GO:0006865//amino acid transport	gi|241956312|ref|XP_002420876.1|/0/basic amino acids permease, putative; lysine/arginine permease, putative [Candida dubliniensis CD36]
orf19.1048	1035	2269	78	235.471	7.73632	-4.92776	Down	0	0	-	GO:0003824//catalytic activity	GO:0008152//metabolic process	gi|68484862|ref|XP_713652.1|/0/hypothetical protein CaO19.1048 [Candida albicans SC5314]
orf19.2082	1308	56	2	4.59857	0.156965	-4.87267	Down	1.73987e-15	8.25259e-15	-	GO:0008233//peptidase activity	-	gi|68472669|ref|XP_719653.1|/0/potential secreted aspartyl proteinase [Candida albicans SC5314]
orf19.4980	1971	63085	2278	3437.81	118.644	-4.85678	Down	0	0	-	GO:0032559	GO:0050896//response to stimulus	gi|1170371|sp|P41797.2|HSP71_CANAL/0/RecName: Full=Heat shock protein SSA1
orf19.5729	1965	338	13	18.4755	0.679142	-4.76576	Down	2.10756e-86	1.74839e-85	GO:0043231//intracellular membrane-bounded organelle	GO:0046914//transition metal ion binding;GO:0003676//nucleic acid binding;GO:0001071//nucleic acid binding transcription factor activity	GO:0006351//transcription, DNA-dependent	gi|68475721|ref|XP_718067.1|/0/potential fungal zinc cluster transcription factor [Candida albicans SC5314]
orf19.5612	2370	1634	63	74.0537	2.7288	-4.76223	Down	0	0	-	-	-	gi|68473697|ref|XP_719173.1|/0/hypothetical WRY family protein 1 [Candida albicans SC5314]
orf19.3803	1770	1018	40	61.7756	2.31989	-4.73491	Down	3.50242e-256	3.8376e-255	-	GO:0016740//transferase activity	GO:0006464//protein modification process	gi|68477474|ref|XP_717208.1|/0/hypothetical protein CaO19.3803 [Candida albicans SC5314]
orf19.6391	921	75	3	8.7467	0.334381	-4.70917	Down	5.09924e-20	2.67842e-19	-	-	-	gi|68479399|ref|XP_716231.1|/3.1603e-155/hypothetical protein CaO19.6391 [Candida albicans SC5314]
orf19.2049	855	97	4	12.1856	0.480257	-4.66523	Down	2.02184e-25	1.13826e-24	-	-	-	gi|68472609|ref|XP_719623.1|/4.71661e-86/hypothetical protein CaO19.9597 [Candida albicans SC5314]
orf19.7436	1839	7652	323	446.926	18.0302	-4.63155	Down	0	0	-	GO:0003676//nucleic acid binding	-	gi|68479857|ref|XP_716097.1|/0/adhesion and aggregation factor [Candida albicans SC5314]
orf19.921	2058	1794	77	93.631	3.84083	-4.6075	Down	0	0	GO:0043231//intracellular membrane-bounded organelle	-	-	gi|68478278|ref|XP_716760.1|/0/potential helix-loop-helix DNA binding protein [Candida albicans SC5314]
orf19.5076.1	225	2690	117	1284.14	53.3806	-4.58834	Down	0	0	-	-	-	gi|380350602|emb|CCG20824.1|/3.97981e-14/hypothetical protein CORT_0A04360 [Candida orthopsilosis Co 90-125]
orf19.4907	1818	3901	170	230.476	9.5992	-4.58556	Down	0	0	-	-	-	gi|68465023|ref|XP_723589.1|/0/hypothetical protein CaO19.4907 [Candida albicans SC5314]
orf19.5103	993	158	7	17.0903	0.723651	-4.56174	Down	4.15238e-40	2.70946e-39	-	-	-	gi|68476695|ref|XP_717640.1|/0/phosphomutase-like protein [Candida albicans SC5314]
orf19.5210	1734	910	41	56.3683	2.42725	-4.53749	Down	1.99758e-223	2.11667e-222	-	GO:0003676//nucleic acid binding;GO:0001071//nucleic acid binding transcription factor activity	GO:0006351//transcription, DNA-dependent	gi|68490523|ref|XP_710918.1|/0/hypothetical protein CaO19.5210 [Candida albicans SC5314]
orf19.5911	1248	10676	488	918.833	40.1407	-4.51666	Down	0	0	-	GO:0004674//protein serine/threonine kinase activity;GO:0032559	GO:0006464//protein modification process	gi|68465525|ref|XP_723124.1|/0/potential calmodulin-dependent protein kinase [Candida albicans SC5314]
orf19.3548.1	198	6089	293	3303.11	151.909	-4.44255	Down	0	0	-	-	GO:0050896//response to stimulus	gi|1175015|sp|P43074.1|WHS11_CANAW/1.93377e-29/RecName: Full=White colony protein WHS11
orf19.2898	1686	137	7	8.72782	0.426207	-4.356	Down	5.3974e-34	3.36046e-33	GO:0031224//intrinsic to membrane	GO:0015301//anion:anion antiporter activity	GO:0006811//ion transport	gi|68480914|ref|XP_715610.1|/0/hypothetical protein CaO19.10416 [Candida albicans SC5314]
orf19.4941	810	70373	3651	9331.77	462.708	-4.33398	Down	0	0	-	-	-	gi|68467209|ref|XP_722266.1|/5.42352e-105/hypothetical protein CaO19.12407 [Candida albicans SC5314]
orf19.7567	1290	322	18	26.8108	1.4324	-4.22631	Down	1.66673e-76	1.31659e-75	-	-	-	gi|68473047|ref|XP_719329.1|/0/hypothetical protein CaO19.7567 [Candida albicans SC5314]
orf19.11	720	143	8	21.3327	1.14061	-4.22519	Down	9.5879e-35	6.03712e-34	-	-	-	gi|238880126|gb|EEQ43764.1|/2.32247e-90/conserved hypothetical protein [Candida albicans WO-1]
orf19.2038	1257	3855	216	329.406	17.64	-4.22295	Down	0	0	-	-	-	gi|68472587|ref|XP_719612.1|/0/hypothetical protein CaO19.9586 [Candida albicans SC5314]
orf19.4215	1878	209	12	11.9535	0.655942	-4.18771	Down	7.40804e-50	5.16451e-49	-	GO:0003824//catalytic activity;GO:0046914//transition metal ion binding	GO:0008152//metabolic process	gi|22506643|dbj|BAC10629.1|/0/hypothetical multicopper oxidase protein [Candida albicans]
orf19.4777	1788	17217	1006	1034.27	57.7578	-4.16245	Down	0	0	-	GO:0016301//kinase activity;GO:0032559	GO:0019400;GO:0006796//phosphate-containing compound metabolic process	gi|238878667|gb|EEQ42305.1|/0/dihydroxyacetone kinase [Candida albicans WO-1]
orf19.2024	360	17	1	5.07212	0.285153	-4.15278	Down	5.15428e-05	9.20633e-05	-	-	-	gi|68472816|ref|XP_719473.1|/1.02328e-62/hypothetical protein CaO19.2024 [Candida albicans SC5314]
orf19.5070	1296	5042	303	417.869	24.0004	-4.12192	Down	0	0	-	-	-	gi|68476631|ref|XP_717608.1|/1.33586e-150/hypothetical protein CaO19.5070 [Candida albicans SC5314]
orf19.6937	1731	832	52	51.6261	3.0838	-4.06532	Down	6.45746e-190	6.52577e-189	GO:0031224//intrinsic to membrane	-	GO:0015833//peptide transport	gi|68486768|ref|XP_712738.1|/0/potential peptide transporter [Candida albicans SC5314]
orf19.5785	879	191	12	23.3393	1.40143	-4.05778	Down	1.03998e-44	7.02588e-44	-	-	-	gi|68481374|ref|XP_715326.1|/1.85592e-133/hypothetical protein CaO19.5785 [Candida albicans SC5314]
orf19.5437	765	15155	957	2127.83	128.419	-4.05045	Down	0	0	-	GO:0019203//carbohydrate phosphatase activity	-	gi|68476319|ref|XP_717809.1|/8.01405e-148/potential DL-glycerol-3-phosphatase [Candida albicans SC5314]
orf19.557	1026	570	36	59.672	3.60193	-4.05021	Down	2.75328e-130	2.57394e-129	-	-	-	gi|68491781|ref|XP_710316.1|/1.29818e-123/hypothetical protein CaO19.557 [Candida albicans SC5314]
orf19.4943	1377	1050	69	81.9027	5.14393	-3.99297	Down	4.26988e-236	4.58806e-235	-	GO:0008905	GO:0008152//metabolic process	gi|68467213|ref|XP_722268.1|/0/hypothetical protein CaO19.12409 [Candida albicans SC5314]
orf19.3869	1755	9010	626	551.43	36.6165	-3.91261	Down	0	0	-	-	-	gi|68485170|ref|XP_713494.1|/0/hypothetical protein CaO19.3869 [Candida albicans SC5314]
orf19.6817	1554	4667	326	322.574	21.5351	-3.90487	Down	0	0	GO:0043231//intracellular membrane-bounded organelle	GO:0046914//transition metal ion binding;GO:0001071//nucleic acid binding transcription factor activity	GO:0006351//transcription, DNA-dependent	gi|68472231|ref|XP_719911.1|/0/potential fungal zinc cluster transcription factor [Candida albicans SC5314]
orf19.4824	819	887	64	116.328	8.02188	-3.85811	Down	1.35811e-194	1.38622e-193	-	GO:0004721//phosphoprotein phosphatase activity	GO:0006464//protein modification process	gi|68464865|ref|XP_723510.1|/4.03871e-156/hypothetical protein CaO19.4824 [Candida albicans SC5314]
orf19.411	1020	4376	316	460.808	31.8029	-3.85693	Down	0	0	-	-	-	gi|68480171|ref|XP_715896.1|/8.6067e-128/hypothetical protein CaO19.8041 [Candida albicans SC5314]
orf19.6770	957	7112	524	798.22	56.2082	-3.82793	Down	0	0	-	-	-	gi|68472141|ref|XP_719866.1|/2.85935e-146/potential epsin-like clathrin-binding protein [Candida albicans SC5314]
orf19.4438	1524	814	60	57.3697	4.04154	-3.82731	Down	1.29576e-177	1.28817e-176	GO:0044464//cell part	GO:0046914//transition metal ion binding	-	gi|68483988|ref|XP_714084.1|/0/potential zinc finger protein [Candida albicans SC5314]
orf19.2344	1158	14802	1104	1372.95	97.868	-3.8103	Down	0	0	-	-	-	gi|68484345|ref|XP_713949.1|/3.89665e-58/hypothetical protein CaO19.2344 [Candida albicans SC5314]
orf19.4940	1680	820	63	52.4261	3.84956	-3.76752	Down	1.04546e-176	1.03597e-175	GO:0031224//intrinsic to membrane	GO:0005275//amine transmembrane transporter activity	GO:0006865//amino acid transport	gi|68467207|ref|XP_722265.1|/0/potential histidine, manganese ion transporter [Candida albicans SC5314]
orf19.868	1638	20395	1602	1337.37	100.399	-3.73559	Down	0	0	-	GO:0005488//binding	GO:0044260;GO:0090304	gi|68469962|ref|XP_720991.1|/0/hypothetical protein CaO19.868 [Candida albicans SC5314]
orf19.5245	2169	397	32	19.6596	1.5145	-3.69831	Down	3.83448e-85	3.15957e-84	-	GO:0003824//catalytic activity	-	gi|68479141|ref|XP_716376.1|/0/hypothetical protein CaO19.12710 [Candida albicans SC5314]
orf19.5205	1446	1805	148	134.076	10.5069	-3.67365	Down	0	0	-	-	-	gi|68490513|ref|XP_710913.1|/0/hypothetical protein CaO19.5205 [Candida albicans SC5314]
orf19.2991	1761	23	2	1.40285	0.116587	-3.58888	Down	6.31048e-06	1.20948e-05	-	-	GO:0006810//transport	gi|68468861|ref|XP_721489.1|/0/potential ion transporter [Candida albicans SC5314]
orf19.3040	1278	1690	149	142.036	11.9684	-3.56896	Down	0	0	-	GO:0016788//hydrolase activity, acting on ester bonds	-	gi|68468959|ref|XP_721538.1|/0/hypothetical protein CaO19.3040 [Candida albicans SC5314]
orf19.787.1	216	351	31	174.54	14.7329	-3.56645	Down	2.9396e-73	2.2808e-72	-	-	-	gi|344305419|gb|EGW35651.1|/2.87355e-12/hypothetical protein SPAPADRAFT_58857 [Spathaspora passalidarum NRRL Y-27907]
orf19.2849	822	13472	1191	1760.37	148.737	-3.56504	Down	0	0	GO:0031224//intrinsic to membrane	-	GO:0006810//transport	gi|68480466|ref|XP_715831.1|/1.45618e-129/potential aquaporin water channel protein [Candida albicans SC5314]
orf19.1363	1179	395	36	35.9854	3.1345	-3.5211	Down	2.30888e-81	1.86973e-80	-	-	-	gi|68482814|ref|XP_714633.1|/1.58034e-155/hypothetical protein CaO19.8943 [Candida albicans SC5314]
orf19.2165	837	147	14	18.864	1.71705	-3.45764	Down	9.5732e-31	5.76656e-30	-	-	-	gi|68479912|ref|XP_716006.1|/1.05821e-159/conserved fungal hypothetical protein [Candida albicans SC5314]
orf19.3997	1050	80504	7784	8235.14	761.016	-3.43579	Down	0	0	-	GO:0016616//oxidoreductase activity, acting on the CH-OH group of donors, NAD or NADP as acceptor;GO:0046914//transition metal ion binding	GO:0008152//metabolic process	gi|68468132|ref|XP_721905.1|/0/hypothetical protein CaO19.3997 [Candida albicans SC5314]
orf19.7252	324	31	3	10.2768	0.950509	-3.43455	Down	2.1383e-07	4.48647e-07	-	-	-	gi|68482065|ref|XP_715050.1|/6.19263e-60/hypothetical protein CaO19.7252 [Candida albicans SC5314]
orf19.1744	816	195	19	25.6677	2.39025	-3.42472	Down	5.40402e-40	3.52241e-39	-	GO:0016836//hydro-lyase activity	GO:0018130	gi|68483297|ref|XP_714390.1|/8.0831e-157/potential uroporphyrinogen-III synthase Hem4p [Candida albicans SC5314]
orf19.33	306	1569	155	550.737	51.9984	-3.40482	Down	0	0	-	-	-	gi|68488663|ref|XP_711840.1|/2.02924e-50/hypothetical LPF family protein 1 [Candida albicans SC5314]
orf19.2972	1716	1249	126	78.1786	7.5376	-3.3746	Down	2.81946e-244	3.06184e-243	-	GO:0004112//cyclic-nucleotide phosphodiesterase activity;GO:0043169//cation binding	GO:0023052//signaling	gi|68468825|ref|XP_721471.1|/0/hypothetical protein CaO19.2972 [Candida albicans SC5314]
orf19.7310	2367	9777	991	443.66	42.9789	-3.36775	Down	0	0	-	-	-	gi|68479020|ref|XP_716444.1|/0/hypothetical protein CaO19.7310 [Candida albicans SC5314]
orf19.6992	1515	597	61	42.3257	4.1333	-3.35617	Down	4.1274e-117	3.72197e-116	-	-	GO:0006810//transport	gi|68482777|ref|XP_714698.1|/0/potential quinidine/multidrug transporter [Candida albicans SC5314]
orf19.6053	1911	893	94	50.1919	5.04949	-3.31325	Down	2.75436e-172	2.71615e-171	-	GO:0016755;GO:0016747//transferase activity, transferring acyl groups other than amino-acyl groups	-	gi|68473824|ref|XP_719015.1|/0/hypothetical protein CaO19.6053 [Candida albicans SC5314]
orf19.633	912	253	27	29.7967	3.03913	-3.29342	Down	1.02903e-49	7.15758e-49	-	GO:0016741	GO:0006730//one-carbon metabolic process	gi|241958664|ref|XP_002422051.1|/1.07813e-123/methyltransferase, putative [Candida dubliniensis CD36]
orf19.3303	2070	1130	124	58.6342	6.14938	-3.25323	Down	6.92494e-214	7.2251e-213	-	GO:0016741	GO:0006730//one-carbon metabolic process	gi|74586411|sp|Q5A931.1|LCMT2_CANAL/0/RecName: Full=Leucine carboxyl methyltransferase 2; AltName: Full=tRNA wybutosine-synthesizing protein 4
orf19.3969	2145	325	36	16.2742	1.72288	-3.23969	Down	1.76223e-62	1.31233e-61	-	GO:0003677//DNA binding	GO:0006351//transcription, DNA-dependent	gi|68467761|ref|XP_722039.1|/0/potential HSF-type DNA binding transcription factor [Candida albicans SC5314]
orf19.6684	735	683	76	99.8105	10.6147	-3.23313	Down	3.0607e-129	2.85696e-128	-	GO:0016811//hydrolase activity, acting on carbon-nitrogen (but not peptide) bonds, in linear amides	-	gi|77023028|ref|XP_888958.1|/4.96828e-144/hypothetical protein CaO19_6684 [Candida albicans SC5314]
orf19.5573	1083	134	15	13.2898	1.42181	-3.22452	Down	1.61654e-26	9.25421e-26	-	-	-	gi|68473621|ref|XP_719135.1|/0/hypothetical HRQ family protein 4 [Candida albicans SC5314]
orf19.3406	1404	220	25	16.8306	1.8279	-3.20282	Down	2.38288e-42	1.57843e-41	GO:0044464//cell part	-	GO:0051234//establishment of localization	gi|68478429|ref|XP_716716.1|/0/hypothetical protein CaO19.3406 [Candida albicans SC5314]
orf19.3967	2964	18862	2158	683.522	74.74	-3.19303	Down	0	0	GO:0043234//protein complex;GO:0044424//intracellular part	GO:0008443//phosphofructokinase activity;GO:0032559	GO:0006796//phosphate-containing compound metabolic process;GO:0006007//glucose catabolic process	gi|68467755|ref|XP_722036.1|/0/phosphofructokinase alpha subunit [Candida albicans SC5314]
orf19.3966	1515	2120	247	150.302	16.7365	-3.1668	Down	0	0	-	GO:0016798//hydrolase activity, acting on glycosyl bonds	GO:0008152//metabolic process	gi|68467753|ref|XP_722035.1|/0/hypothetical protein CaO19.11448 [Candida albicans SC5314]
orf19.6660	1542	6824	796	475.332	52.9918	-3.1651	Down	0	0	-	-	-	gi|68489480|ref|XP_711413.1|/0/hypothetical protein CaO19.6660 [Candida albicans SC5314]
orf19.6540	2841	38845	4562	1468.61	164.841	-3.15531	Down	0	0	GO:0043234//protein complex;GO:0044424//intracellular part	GO:0008443//phosphofructokinase activity;GO:0032559	GO:0006796//phosphate-containing compound metabolic process;GO:0006007//glucose catabolic process	gi|68469182|ref|XP_721378.1|/0/phosphofructokinase beta-subunit [Candida albicans SC5314]
orf19.4212	1881	68	8	3.88296	0.436598	-3.15278	Down	7.68952e-14	3.29228e-13	-	GO:0003824//catalytic activity;GO:0046914//transition metal ion binding	GO:0008152//metabolic process	gi|68489849|ref|XP_711264.1|/0/potential multicopper ferro-O2-oxidoreductase [Candida albicans SC5314]
orf19.4231	1194	1364	162	122.702	13.9281	-3.1391	Down	3.37582e-249	3.67256e-248	-	-	-	gi|68470328|ref|XP_720668.1|/0/hypothetical protein CaO19.11706 [Candida albicans SC5314]
orf19.6491	354	58	7	17.5982	2.0299	-3.11594	Down	7.1815e-12	1.94885e-11	-	-	-	gi|68469088|ref|XP_721331.1|/2.70791e-63/hypothetical protein CaO19.6491 [Candida albicans SC5314]
orf19.2179	1815	2240	275	132.561	15.5538	-3.09131	Down	0	0	-	-	GO:0006810//transport	gi|68479941|ref|XP_716020.1|/0/ferrichrome-type siderophore transporter [Candida albicans SC5314]
orf19.4366	1947	24	3	1.324	0.158174	-3.06532	Down	1.64704e-05	3.05985e-05	-	-	-	gi|68481801|ref|XP_715142.1|/0/hypothetical YFW family protein 8 [Candida albicans SC5314]
orf19.5102	2265	1704	217	80.8061	9.83494	-3.03848	Down	4.62808e-301	5.21106e-300	-	GO:0004091//carboxylesterase activity;GO:0016298//lipase activity	GO:0006644//phospholipid metabolic process	gi|238878751|gb|EEQ42389.1|/0/lysophospholipase precursor [Candida albicans WO-1]
orf19.2219	3627	3020	385	89.4339	10.8967	-3.03694	Down	0	0	-	GO:0003676//nucleic acid binding;GO:0034061	GO:0006260//DNA replication	gi|68480025|ref|XP_716059.1|/0/retrotransposon Tca3 polyprotein fragment [Candida albicans SC5314]
orf19.6888	1329	681	87	55.0383	6.72008	-3.03389	Down	3.05524e-121	2.77972e-120	-	-	-	gi|68486646|ref|XP_712817.1|/1.32007e-177/potential zinc finger upstream protein 3 fragment [Candida albicans SC5314]
orf19.5342.2	189	211	27	119.912	14.665	-3.03153	Down	1.20834e-38	7.85097e-38	-	-	-	-
orf19.5334	612	26624	3446	4672.67	578.021	-3.01505	Down	0	0	-	GO:0046914//transition metal ion binding	-	gi|68477649|ref|XP_717137.1|/2.59631e-91/hypothetical protein CaO19.5334 [Candida albicans SC5314]
orf19.1863	1788	68	9	4.08493	0.51672	-2.98286	Down	3.4594e-13	1.28342e-12	GO:0044464//cell part	GO:0005088//Ras guanyl-nucleotide exchange factor activity	GO:0007266//Rho protein signal transduction	gi|238883653|gb|EEQ47291.1|/0/conserved hypothetical protein [Candida albicans WO-1]
orf19.6837	762	82	11	11.5585	1.4819	-2.96344	Down	1.52127e-15	7.22693e-15	-	GO:0003824//catalytic activity	GO:0008152//metabolic process	gi|241948733|ref|XP_002417089.1|/2.9341e-134/oxidoreductase, putative [Candida dubliniensis CD36]
orf19.1193	1740	7207	972	444.885	57.3452	-2.95569	Down	0	0	GO:0031224//intrinsic to membrane	GO:0005275//amine transmembrane transporter activity	GO:0006865//amino acid transport	gi|68487368|ref|XP_712455.1|/0/potential glutamine permease [Candida albicans SC5314]
orf19.4776	2631	298	41	12.1657	1.59972	-2.92693	Down	4.0885e-52	2.88984e-51	GO:0043231//intracellular membrane-bounded organelle	GO:0046914//transition metal ion binding;GO:0001071//nucleic acid binding transcription factor activity	GO:0006351//transcription, DNA-dependent	gi|68464769|ref|XP_723462.1|/0/potential fungal zinc cluster transcription factor [Candida albicans SC5314]
orf19.4056	1272	5135	708	433.607	57.1382	-2.92386	Down	0	0	-	GO:0046914//transition metal ion binding;GO:0003677//DNA binding;GO:0001071//nucleic acid binding transcription factor activity	GO:0006351//transcription, DNA-dependent	gi|68490893|ref|XP_710734.1|/2.69934e-164/hypothetical protein CaO19.11538 [Candida albicans SC5314]
orf19.5860	405	36	5	9.54751	1.26735	-2.91332	Down	2.11242e-07	4.43674e-07	-	-	-	gi|68465429|ref|XP_723076.1|/9.87598e-42/hypothetical protein CaO19.5860 [Candida albicans SC5314]
orf19.542	1455	31892	4431	2354.3	312.622	-2.91281	Down	0	0	-	GO:0016773//phosphotransferase activity, alcohol group as acceptor;GO:0032559	GO:0006796//phosphate-containing compound metabolic process;GO:0006007//glucose catabolic process	gi|68477224|ref|XP_717405.1|/0/likely hexokinase II [Candida albicans SC5314]
orf19.1763	1113	71	10	6.85182	0.922327	-2.89314	Down	2.44372e-13	9.30897e-13	-	GO:0003824//catalytic activity;GO:0046914//transition metal ion binding	GO:0008152//metabolic process	gi|68483333|ref|XP_714408.1|/0/potential zinc-binding dehydrogenase [Candida albicans SC5314]
orf19.909	1131	8420	1186	799.636	107.647	-2.89303	Down	0	0	GO:0044464//cell part	GO:0046914//transition metal ion binding	-	gi|68469793|ref|XP_721148.1|/1.24835e-178/potential zinc finger protein [Candida albicans SC5314]
orf19.5626	1230	27796	3991	2427.28	333.086	-2.86537	Down	0	0	-	-	-	gi|68473723|ref|XP_719186.1|/3.05143e-149/hypothetical protein CaO19.5626 [Candida albicans SC5314]
orf19.1442	2109	1166	169	59.3834	8.22603	-2.85179	Down	1.09187e-193	1.11076e-192	-	GO:0004091//carboxylesterase activity;GO:0016298//lipase activity	GO:0006644//phospholipid metabolic process	gi|238881944|gb|EEQ45582.1|/0/hypothetical protein CAWG_03911 [Candida albicans WO-1]
orf19.3649	855	1757	259	220.723	31.0967	-2.82741	Down	2.85532e-288	3.19149e-287	-	-	-	gi|74589025|sp|Q59NN8.1|FES1_CANAL/9.99025e-145/RecName: Full=Hsp70 nucleotide exchange factor FES1
orf19.3441	792	1753	260	237.739	33.6999	-2.81856	Down	1.14504e-286	1.27751e-285	GO:0044464//cell part	-	-	gi|68478493|ref|XP_716748.1|/2.64017e-141/possible transmembrane sensor/transporter [Candida albicans SC5314]
orf19.1290	1851	3635	540	210.931	29.948	-2.81624	Down	0	0	-	GO:0016773//phosphotransferase activity, alcohol group as acceptor	GO:0044238//primary metabolic process;GO:0006796//phosphate-containing compound metabolic process	gi|238881344|gb|EEQ44982.1|/0/hypothetical protein CAWG_03284 [Candida albicans WO-1]
orf19.5902	963	195	29	21.7496	3.09138	-2.81467	Down	2.60344e-33	1.61271e-32	GO:0044464//cell part	GO:0032561//guanyl ribonucleotide binding;GO:0017111//nucleoside-triphosphatase activity	GO:0035556//intracellular signal transduction;GO:0009207	gi|68465509|ref|XP_723116.1|/2.05603e-168/potential Ras family GTPase [Candida albicans SC5314]
orf19.1906	330	107	16	34.8267	4.97721	-2.80679	Down	7.16188e-19	3.66118e-18	-	-	-	gi|68491422|ref|XP_710471.1|/4.14083e-48/hypothetical protein CaO19.1906 [Candida albicans SC5314]
orf19.4784	3594	1147	174	34.279	4.96994	-2.78602	Down	6.23084e-186	6.27601e-185	GO:0031224//intrinsic to membrane	GO:0043169//cation binding;GO:0043682//copper-transporting ATPase activity;GO:0032559	GO:0035434//copper ion transmembrane transport;GO:0009206	gi|68464785|ref|XP_723470.1|/0/hypothetical protein CaO19.4784 [Candida albicans SC5314]
orf19.1656	1797	1183	180	70.7098	10.2826	-2.7817	Down	2.16192e-191	2.19204e-190	-	-	-	gi|68468347|ref|XP_721733.1|/0/hypothetical protein CaO19.1656 [Candida albicans SC5314]
orf19.1641	1272	59	9	4.98205	0.726333	-2.77804	Down	6.90032e-11	1.7248e-10	-	GO:0016811//hydrolase activity, acting on carbon-nitrogen (but not peptide) bonds, in linear amides	-	gi|68468317|ref|XP_721718.1|/0/formamidase-like protein [Candida albicans SC5314]
orf19.5770	2157	384	59	19.1216	2.8079	-2.76764	Down	5.73896e-63	4.28949e-62	-	-	GO:0006810//transport	gi|68475797|ref|XP_718105.1|/0/potential OPT family transporter [Candida albicans SC5314]
orf19.2877	1704	199562	30841	12579.1	1857.97	-2.75923	Down	0	0	-	GO:0046872//metal ion binding;GO:0016831//carboxy-lyase activity;GO:0019842//vitamin binding	-	gi|353526276|sp|P83779.2|PDC1_CANAL/0/RecName: Full=Pyruvate decarboxylase
orf19.2251	1044	83	13	8.53926	1.27827	-2.73992	Down	1.3438e-14	6.21953e-14	-	GO:0016814//hydrolase activity, acting on carbon-nitrogen (but not peptide) bonds, in cyclic amidines	GO:0009127//purine nucleoside monophosphate biosynthetic process	gi|68482418|ref|XP_714841.1|/0/potential adenine aminohydrolase [Candida albicans SC5314]
orf19.5818	1029	5316	837	554.897	83.5007	-2.73236	Down	0	0	GO:0031224//intrinsic to membrane	GO:0046914//transition metal ion binding;GO:0003824//catalytic activity	GO:0006631//fatty acid metabolic process	gi|68481440|ref|XP_715359.1|/0/potential sphingosine hydroxylase [Candida albicans SC5314]
orf19.7311	585	387	61	71.0555	10.7042	-2.73077	Down	1.47957e-62	1.10318e-61	-	-	-	gi|68479022|ref|XP_716445.1|/3.8299e-86/hypothetical protein CaO19.7311 [Candida albicans SC5314]
orf19.2367	447	19	3	4.56551	0.68896	-2.72828	Down	0.0003282	0.000549757	-	-	-	gi|68486951|ref|XP_712657.1|/4.35236e-72/hypothetical protein CaO19.2367 [Candida albicans SC5314]
orf19.3746	2790	63	10	2.42538	0.367939	-2.72067	Down	2.56878e-11	6.55763e-11	-	-	GO:0006810//transport	gi|68485275|ref|XP_713471.1|/0/potential oligopeptide transporter [Candida albicans SC5314]
orf19.4872	852	94	15	11.8503	1.80731	-2.71302	Down	3.37718e-16	1.6284e-15	-	-	-	gi|68464957|ref|XP_723556.1|/8.73763e-125/hypothetical protein CaO19.4872 [Candida albicans SC5314]
orf19.6592	1770	1244	202	75.4901	11.7154	-2.68788	Down	7.5926e-194	7.73686e-193	-	-	GO:0006810//transport	gi|68489723|ref|XP_711294.1|/0/potential transporter [Candida albicans SC5314]
orf19.6116	1131	1466	242	139.224	21.9651	-2.66412	Down	6.9739e-226	7.41538e-225	-	GO:0004396//hexokinase activity;GO:0032559	GO:0006796//phosphate-containing compound metabolic process;GO:0006007//glucose catabolic process	gi|68487478|ref|XP_712360.1|/0/likely hexokinase [Candida albicans SC5314]
orf19.3887	552	909	151	176.875	28.0813	-2.65505	Down	3.00802e-140	2.84691e-139	-	-	-	gi|68485127|ref|XP_713553.1|/7.43438e-78/hypothetical protein CaO19.11368 [Candida albicans SC5314]
orf19.2899	789	36	6	4.90081	0.780646	-2.65028	Down	7.96024e-07	1.61691e-06	-	GO:0003824//catalytic activity	GO:0008152//metabolic process	gi|68480916|ref|XP_715611.1|/3.33139e-120/hypothetical protein CaO19.10417 [Candida albicans SC5314]
orf19.2261	780	773	130	106.446	17.1092	-2.63727	Down	1.17264e-118	1.06215e-117	-	GO:0005488//binding	-	gi|68482438|ref|XP_714851.1|/5.00539e-137/likely U2-associated splicing factor [Candida albicans SC5314]
orf19.2674	1029	100	17	10.4382	1.69595	-2.62171	Down	1.44587e-16	7.06637e-16	-	-	-	gi|68470840|ref|XP_720427.1|/1.17961e-124/hypothetical protein CaO19.2674 [Candida albicans SC5314]
orf19.1971	1485	595	102	43.0361	7.05105	-2.60964	Down	1.10312e-90	9.39339e-90	-	GO:0046914//transition metal ion binding	-	gi|68480705|ref|XP_715733.1|/0/potential zinc RING finger protein [Candida albicans SC5314]
orf19.101	1041	750	130	77.3844	12.8195	-2.5937	Down	4.49206e-113	4.02115e-112	-	-	-	gi|68483499|ref|XP_714310.1|/3.68323e-174/possible ambient pH signal transduction pathway sensor [Candida albicans SC5314]
orf19.2881	2991	3566	634	128.058	21.7597	-2.55707	Down	0	0	-	GO:0003824//catalytic activity	-	gi|68480991|ref|XP_715537.1|/0/hypothetical protein CaO19.2881 [Candida albicans SC5314]
orf19.4358	303	101	18	35.8032	6.09832	-2.5536	Down	2.83562e-16	1.37377e-15	-	-	-	gi|68481787|ref|XP_715135.1|/2.84573e-44/hypothetical protein CaO19.4358 [Candida albicans SC5314]
orf19.4318	1713	14305	2552	896.96	152.934	-2.55214	Down	0	0	-	-	-	gi|68470496|ref|XP_720752.1|/0/potential zinc finger transcription factor [Candida albicans SC5314]
orf19.756	1767	134	24	8.14537	1.3943	-2.54644	Down	4.51298e-21	2.39725e-20	-	GO:0004175//endopeptidase activity	GO:0019538//protein metabolic process	gi|68484925|ref|XP_713601.1|/0/secretory aspartyl proteinase SAP7p [Candida albicans SC5314]
orf19.1353	537	6604	1185	1320.92	226.529	-2.54377	Down	0	0	-	-	-	gi|68491956|ref|XP_710245.1|/1.41664e-62/hypothetical protein CaO19.8933 [Candida albicans SC5314]
orf19.733	1341	645	116	51.6623	8.87993	-2.54049	Down	2.94298e-95	2.53071e-94	GO:0031224//intrinsic to membrane	-	GO:0006810//transport	gi|68485993|ref|XP_713115.1|/0/potential Auxin Efflux Carrier protein [Candida albicans SC5314]
orf19.3801	2547	33	6	1.39164	0.241826	-2.52475	Down	4.35582e-06	8.44907e-06	-	-	-	gi|68477470|ref|XP_717206.1|/0/hypothetical protein CaO19.3801 [Candida albicans SC5314]
orf19.6555	357	66	12	19.8572	3.45059	-2.52475	Down	5.72898e-11	1.43377e-10	GO:0005739//mitochondrion	GO:0046914//transition metal ion binding	GO:0006810//transport	gi|68469208|ref|XP_721391.1|/1.74628e-70/hypothetical protein CaO19.6555 [Candida albicans SC5314]
orf19.3589	930	60	11	6.92965	1.2142	-2.51278	Down	4.85868e-10	1.16907e-09	GO:0043232	GO:0003676//nucleic acid binding;GO:0032559	GO:0044260	gi|68483202|ref|XP_714436.1|/7.37218e-168/hypothetical protein CaO19.3589 [Candida albicans SC5314]
orf19.2296	7656	46033	8443	645.818	113.207	-2.51216	Down	0	0	-	-	-	gi|238878479|gb|EEQ42117.1|/0/conserved hypothetical protein [Candida albicans WO-1]
orf19.1067	786	1368	252	186.942	32.9123	-2.50589	Down	7.22854e-197	7.4029e-196	-	GO:0004619//phosphoglycerate mutase activity	GO:0006007//glucose catabolic process	gi|68484809|ref|XP_713716.1|/8.07123e-151/hypothetical protein CaO19.8669 [Candida albicans SC5314]
orf19.3618	1602	88449	16349	5930.25	1047.63	-2.50096	Down	0	0	-	-	-	gi|68483153|ref|XP_714511.1|/0/potential yeast form cell wall protein [Candida albicans SC5314]
orf19.1862	366	1554	290	456.05	81.3387	-2.48718	Down	1.8953e-221	1.99791e-220	-	-	-	gi|68485769|ref|XP_713165.1|/8.6141e-62/hypothetical protein CaO19.9418 [Candida albicans SC5314]
orf19.5206	1530	737	139	51.7391	9.32617	-2.4719	Down	2.94876e-105	2.60155e-104	-	-	-	gi|68490515|ref|XP_710914.1|/0/hypothetical protein CaO19.5206 [Candida albicans SC5314]
orf19.3440	834	53	10	6.82579	1.23088	-2.47131	Down	7.18706e-09	1.64329e-08	GO:0044464//cell part	-	-	gi|68478491|ref|XP_716747.1|/2.50817e-153/possible transmembrane sensor/transporter [Candida albicans SC5314]
orf19.308	1536	159	30	11.1186	2.00498	-2.47131	Down	6.0156e-24	3.33449e-23	-	-	-	gi|68471657|ref|XP_720135.1|/0/hypothetical protein CaO19.7940 [Candida albicans SC5314]
orf19.3442	1242	890	170	76.9682	14.051	-2.45359	Down	1.19942e-125	1.10607e-124	-	GO:0016651//oxidoreductase activity, acting on NADH or NADPH;GO:0000166//nucleotide binding	GO:0008152//metabolic process	gi|68478495|ref|XP_716749.1|/0/potential NADH-dependent flavin oxidoreductase [Candida albicans SC5314]
orf19.4195	399	47	9	12.6523	2.31553	-2.44998	Down	6.13896e-08	1.32862e-07	-	-	-	gi|68489815|ref|XP_711247.1|/2.68017e-71/potential zinc finger protein [Candida albicans SC5314]
orf19.2119	1515	8742	1674	619.785	113.429	-2.44998	Down	0	0	-	GO:0001071//nucleic acid binding transcription factor activity	GO:0010467//gene expression	gi|238881828|gb|EEQ45466.1|/8.3761e-163/predicted protein [Candida albicans WO-1]
orf19.333	1581	590	113	40.0833	7.33714	-2.44971	Down	9.60638e-84	7.86257e-83	GO:0044464//cell part	GO:0015932//nucleobase-containing compound transmembrane transporter activity	GO:0015931//nucleobase-containing compound transport	gi|68471970|ref|XP_720028.1|/0/potential purine-cytosine permease [Candida albicans SC5314]
orf19.3749	2718	172	33	6.79707	1.24636	-2.44719	Down	1.65117e-25	9.32157e-25	-	-	GO:0006810//transport	gi|68485352|ref|XP_713437.1|/0/potential oligopeptide transporter [Candida albicans SC5314]
orf19.4771	2121	546	105	27.65	5.08193	-2.44383	Down	2.0542e-77	1.63109e-76	-	-	-	gi|68464759|ref|XP_723457.1|/0/hypothetical protein CaO19.4771 [Candida albicans SC5314]
orf19.2830	1650	633	122	41.2062	7.59025	-2.44064	Down	2.4553e-89	2.07631e-88	-	-	-	gi|68480424|ref|XP_715811.1|/0/hypothetical protein CaO19.10348 [Candida albicans SC5314]
orf19.4821	1407	83	16	6.33617	1.16736	-2.44036	Down	5.39556e-13	1.87648e-12	-	GO:0004091//carboxylesterase activity	GO:0006629//lipid metabolic process	gi|68464859|ref|XP_723507.1|/0/C. albicans secretory lipase 1 [Candida albicans SC5314]
orf19.2691	723	2006	387	298.013	54.9481	-2.43923	Down	6.9522e-279	7.71429e-278	-	-	-	gi|68470874|ref|XP_720444.1|/1.84734e-103/hypothetical protein CaO19.2691 [Candida albicans SC5314]
orf19.951	489	2391	464	525.186	97.4068	-2.43074	Down	0	0	-	-	-	gi|68478217|ref|XP_716850.1|/2.01529e-40/hypothetical protein CaO19.8566 [Candida albicans SC5314]
orf19.7381	1875	174	34	9.9676	1.86148	-2.4208	Down	1.75966e-25	9.91572e-25	GO:0043231//intracellular membrane-bounded organelle	GO:0046914//transition metal ion binding;GO:0001071//nucleic acid binding transcription factor activity	GO:0006351//transcription, DNA-dependent	gi|68478707|ref|XP_716622.1|/0/potential fungal zinc cluster transcription factor [Candida albicans SC5314]
orf19.5625	534	1890	370	380.157	71.128	-2.41811	Down	3.37042e-260	3.70625e-259	-	-	-	gi|68473721|ref|XP_719185.1|/7.91231e-58/hypothetical protein CaO19.5625 [Candida albicans SC5314]
orf19.3836	753	193	38	27.5299	5.18046	-2.40985	Down	5.86344e-28	3.42398e-27	-	GO:0016741	GO:0006730//one-carbon metabolic process	gi|68477379|ref|XP_717316.1|/1.85827e-133/hypothetical protein CaO19.11317 [Candida albicans SC5314]
orf19.220	1041	9890	1949	1020.44	192.195	-2.40855	Down	0	0	-	-	-	gi|68487085|ref|XP_712603.1|/1.14763e-167/hypothetical protein CaO19.220 [Candida albicans SC5314]
orf19.3104	891	1729	341	208.43	39.2877	-2.40741	Down	5.8304e-237	6.30922e-236	GO:0031224//intrinsic to membrane	GO:0016810//hydrolase activity, acting on carbon-nitrogen (but not peptide) bonds	GO:0046519	gi|68481136|ref|XP_715483.1|/2.29062e-179/hypothetical protein CaO19.10616 [Candida albicans SC5314]
orf19.1446	1479	5079	1007	368.853	69.8942	-2.3998	Down	0	0	GO:0043231//intracellular membrane-bounded organelle	-	GO:0009987//cellular process	gi|68466601|ref|XP_722496.1|/0/likely G2 B-type cyclin [Candida albicans SC5314]
orf19.4889	1755	357	71	21.8491	4.15299	-2.39535	Down	4.88852e-50	3.41192e-49	-	-	GO:0006810//transport	gi|68464989|ref|XP_723572.1|/0/potential ion transporter [Candida albicans SC5314]
orf19.3656	1440	1734	345	129.339	24.5944	-2.39475	Down	3.663e-236	3.94288e-235	GO:0016020//membrane	-	GO:0065003;GO:0006783//heme biosynthetic process	gi|68489612|ref|XP_711376.1|/0/hypothetical protein CaO19.11140 [Candida albicans SC5314]
orf19.2969	2559	2402	478	100.82	19.1751	-2.39447	Down	0	0	-	GO:0046914//transition metal ion binding;GO:0003676//nucleic acid binding;GO:0017111//nucleoside-triphosphatase activity;GO:0032559	GO:0009207	gi|68468819|ref|XP_721468.1|/0/hypothetical protein CaO19.2969 [Candida albicans SC5314]
orf19.2602	2352	40	8	1.82669	0.349167	-2.38725	Down	9.10376e-07	1.84306e-06	-	-	GO:0006810//transport	gi|68475288|ref|XP_718362.1|/0/oligopeptide transporter Opt1p [Candida albicans SC5314]
orf19.7197	2238	739	148	35.4672	6.78862	-2.3853	Down	2.98432e-101	2.60287e-100	-	-	-	gi|68481754|ref|XP_715245.1|/0/hypothetical protein CaO19.7197 [Candida albicans SC5314]
orf19.7586	1704	3486	699	219.736	42.1102	-2.38353	Down	0	0	-	GO:0004553//hydrolase activity, hydrolyzing O-glycosyl compounds;GO:0043167//ion binding	GO:0044238//primary metabolic process	gi|238880375|gb|EEQ44013.1|/1.03514e-180/hypothetical protein CAWG_02272 [Candida albicans WO-1]
orf19.7459	1842	8517	1708	496.638	95.1872	-2.38336	Down	0	0	-	-	-	gi|74590313|sp|Q5A2V2.1|RMD9_CANAL/0/RecName: Full=Protein RMD9, mitochondrial; Flags: Precursor
orf19.6354	651	258	52	42.5678	8.19978	-2.37611	Down	2.85874e-36	1.83211e-35	-	-	-	gi|68489056|ref|XP_711641.1|/1.20098e-92/hypothetical protein CaO19.13711 [Candida albicans SC5314]
orf19.734	1419	6454	1302	488.528	94.1908	-2.37478	Down	0	0	-	GO:0004396//hexokinase activity;GO:0032559	GO:0006796//phosphate-containing compound metabolic process;GO:0006007//glucose catabolic process	gi|68485995|ref|XP_713116.1|/0/likely hexokinase [Candida albicans SC5314]
orf19.4756	1653	333	68	21.6379	4.22295	-2.35723	Down	6.33314e-46	4.32152e-45	-	-	-	gi|68464729|ref|XP_723442.1|/0/potential integral membrane protein [Candida albicans SC5314]
orf19.4309	1026	8042	1643	841.898	164.388	-2.35654	Down	0	0	-	GO:0048037//cofactor binding;GO:0016616//oxidoreductase activity, acting on the CH-OH group of donors, NAD or NADP as acceptor	GO:0008152//metabolic process	gi|68470480|ref|XP_720744.1|/0/potential oxidoreductase [Candida albicans SC5314]
orf19.125	1224	44	9	3.86113	0.754816	-2.35482	Down	3.15034e-07	6.53364e-07	-	GO:0016651//oxidoreductase activity, acting on NADH or NADPH;GO:0000166//nucleotide binding	GO:0008152//metabolic process	gi|68483541|ref|XP_714331.1|/0/potential NADH-dependent flavin oxidoreductase [Candida albicans SC5314]
orf19.1664	2601	599	123	24.736	4.8545	-2.34922	Down	6.09078e-81	4.9258e-80	-	GO:0004553//hydrolase activity, hydrolyzing O-glycosyl compounds	GO:0008152//metabolic process	gi|68468363|ref|XP_721741.1|/0/potential glycosyl hydrolase [Candida albicans SC5314]
orf19.7380	2517	644	133	27.4818	5.42436	-2.34095	Down	1.57634e-86	1.31305e-85	-	-	-	gi|68478705|ref|XP_716621.1|/0/hypothetical protein CaO19.7380 [Candida albicans SC5314]
orf19.769	1185	455	94	41.2416	8.1431	-2.34045	Down	1.26256e-61	9.36807e-61	-	GO:0016616//oxidoreductase activity, acting on the CH-OH group of donors, NAD or NADP as acceptor;GO:0046914//transition metal ion binding	GO:0008152//metabolic process	gi|68485026|ref|XP_713579.1|/0/potential butanediol dehydrogenase [Candida albicans SC5314]
orf19.4998	2976	22351	4629	806.69	159.674	-2.33689	Down	0	0	-	-	-	gi|68467311|ref|XP_722317.1|/0/hypothetical protein CaO19.12465 [Candida albicans SC5314]
orf19.6447	540	1283	266	255.197	50.5671	-2.33534	Down	4.43308e-170	4.33662e-169	GO:0044464//cell part	GO:0032561//guanyl ribonucleotide binding	GO:0035556//intracellular signal transduction	gi|68479505|ref|XP_716284.1|/1.05551e-97/potential ADP-ribosylation factor [Candida albicans SC5314]
orf19.1488	660	52	11	8.46257	1.71092	-2.30633	Down	3.78356e-08	8.27053e-08	-	-	-	gi|68466683|ref|XP_722537.1|/4.72823e-76/hypothetical protein CaO19.1488 [Candida albicans SC5314]
orf19.138	798	33	7	4.44175	0.900482	-2.30236	Down	1.34617e-05	2.51389e-05	-	-	-	gi|68483567|ref|XP_714344.1|/4.18928e-94/potential low affinity Ca2+ influx system membrane protein [Candida albicans SC5314]
orf19.3190	3033	987	210	34.9532	7.10767	-2.29798	Down	9.33622e-129	8.70147e-128	-	GO:0005488//binding	-	gi|68482953|ref|XP_714607.1|/0/potential fungal zinc cluster transcription factor [Candida albicans SC5314]
orf19.3575	1515	86857	18533	6157.93	1255.78	-2.29386	Down	0	0	-	GO:0031420;GO:0016301//kinase activity;GO:0032559	GO:0006796//phosphate-containing compound metabolic process;GO:0006007//glucose catabolic process	gi|353526331|sp|P46614.3|KPYK_CANAL/0/RecName: Full=Pyruvate kinase; Short=PK
orf19.3301	2208	3078	659	149.731	30.6384	-2.28896	Down	0	0	-	-	-	gi|68475015|ref|XP_718393.1|/0/potential negative regulator of sulfur metabolism [Candida albicans SC5314]
orf19.1395	1017	595	128	62.8404	12.9202	-2.28206	Down	1.10491e-77	8.80759e-77	GO:0031224//intrinsic to membrane	-	GO:0051234//establishment of localization	gi|68482870|ref|XP_714661.1|/9.97921e-177/likely mitochondrial carrier family protein [Candida albicans SC5314]
orf19.3726	2991	325	70	11.671	2.40249	-2.28033	Down	3.73884e-43	2.49283e-42	-	-	-	gi|68485308|ref|XP_713415.1|/0/hypothetical protein CaO19.3726 [Candida albicans SC5314]
orf19.1676	1107	640	138	62.0976	12.7971	-2.27872	Down	2.80438e-83	2.29224e-82	-	-	-	gi|238880596|gb|EEQ44234.1|/0/conserved hypothetical protein [Candida albicans WO-1]
orf19.5204	1638	2334	504	153.049	31.5862	-2.27663	Down	2.05934e-298	2.31449e-297	-	-	-	gi|68490511|ref|XP_710912.1|/0/hypothetical protein CaO19.5204 [Candida albicans SC5314]
orf19.3643	1173	37	8	3.38802	0.700119	-2.27477	Down	4.586e-06	8.87304e-06	GO:0044464//cell part	GO:0046914//transition metal ion binding	-	gi|68489682|ref|XP_711316.1|/1.61554e-168/hypothetical protein CaO19.3643 [Candida albicans SC5314]
orf19.5602	1941	2790	606	154.391	32.0499	-2.26819	Down	0	0	-	-	-	gi|68473677|ref|XP_719163.1|/0/hypothetical WRY family protein 2 [Candida albicans SC5314]
orf19.1275	2067	818	179	42.5065	8.88981	-2.25746	Down	9.56454e-105	8.41404e-104	-	GO:0046914//transition metal ion binding;GO:0003677//DNA binding;GO:0001071//nucleic acid binding transcription factor activity	GO:0006351//transcription, DNA-dependent	gi|68478842|ref|XP_716583.1|/0/hypothetical protein CaO19.1275 [Candida albicans SC5314]
orf19.700	1824	105	23	6.18311	1.29444	-2.256	Down	9.1449e-15	4.27461e-14	-	-	GO:0006810//transport	gi|68488768|ref|XP_711773.1|/0/potential transporter [Candida albicans SC5314]
orf19.2455	3396	994	219	31.4385	6.61998	-2.24763	Down	3.2558e-126	3.01149e-125	-	-	-	gi|238878959|gb|EEQ42597.1|/0/conserved hypothetical protein [Candida albicans WO-1]
orf19.2778	2229	131	29	6.31254	1.33557	-2.24076	Down	6.16788e-18	3.08849e-17	-	-	-	gi|68488791|ref|XP_711742.1|/0/hypothetical protein CaO19.10294 [Candida albicans SC5314]
orf19.5114.1	192	4767	1064	2666.78	568.88	-2.2289	Down	0	0	-	-	-	gi|380350791|emb|CCG21013.1|/5.86459e-18/hypothetical protein CORT_0A06270 [Candida orthopsilosis Co 90-125]
orf19.1799	1857	667	152	38.5795	8.40256	-2.19893	Down	4.8863e-83	3.98331e-82	GO:0016020//membrane	-	GO:0006865//amino acid transport	gi|68489459|ref|XP_711447.1|/0/potential general amino acid permease [Candida albicans SC5314]
orf19.2050	1623	5493	1262	363.525	79.8217	-2.1872	Down	0	0	-	-	GO:0044238//primary metabolic process	gi|68472611|ref|XP_719624.1|/0/hypothetical protein CaO19.9598 [Candida albicans SC5314]
orf19.6659	1707	2326	536	146.359	32.2338	-2.18286	Down	2.67152e-282	2.96976e-281	GO:0031224//intrinsic to membrane	GO:0005275//amine transmembrane transporter activity	GO:0006865//amino acid transport	gi|68489478|ref|XP_711412.1|/0/potential general amino acid permease [Candida albicans SC5314]
orf19.3302	2103	9571	2220	488.833	108.366	-2.17343	Down	0	0	-	-	-	gi|68475017|ref|XP_718394.1|/0/hypothetical protein CaO19.10812 [Candida albicans SC5314]
orf19.1708	660	116	27	18.878	4.19952	-2.16841	Down	1.84548e-15	8.74672e-15	-	-	-	gi|74587365|sp|Q5AJ85.1|RRT14_CANAL/5.43494e-56/RecName: Full=Regulator of rDNA transcription 14
orf19.5276	1248	30	7	2.58196	0.575789	-2.16485	Down	6.60802e-05	0.000117004	-	-	-	gi|68479203|ref|XP_716407.1|/0/hypothetical protein CaO19.12741 [Candida albicans SC5314]
orf19.4450.2	243	76	18	33.5931	7.60407	-2.14332	Down	1.8382e-10	4.50452e-10	-	-	-	-
orf19.2839	1668	1865	442	120.095	27.2023	-2.14238	Down	1.7914e-221	1.89164e-220	-	-	-	gi|68480551|ref|XP_715770.1|/0/potential Cirt family transposase [Candida albicans SC5314]
orf19.154	1086	97	23	9.59367	2.17409	-2.14167	Down	5.67738e-13	1.96443e-12	-	-	-	gi|68491195|ref|XP_710605.1|/2.93815e-145/potential U3 snoRNP protein Utp30 [Candida albicans SC5314]
orf19.2581	996	139	33	14.9899	3.40122	-2.13987	Down	5.7525e-18	2.88285e-17	-	GO:0048037//cofactor binding;GO:0016616//oxidoreductase activity, acting on the CH-OH group of donors, NAD or NADP as acceptor	GO:0008152//metabolic process	gi|3859682|emb|CAA22019.1|/0/conserved hypothetical protein [Candida albicans]
orf19.896	7416	2770	659	40.1193	9.12212	-2.13685	Down	0	0	GO:0044464//cell part	GO:0004673//protein histidine kinase activity;GO:0004871//signal transducer activity;GO:0032559	GO:0006468//protein phosphorylation;GO:0007165//signal transduction;GO:0006351//transcription, DNA-dependent	gi|68469773|ref|XP_721138.1|/0/likely histidine kinase osmosensor and regulator Chk1p [Candida albicans SC5314]
orf19.903	747	45891	10982	6598.57	1509.18	-2.12839	Down	0	0	-	GO:0004619//phosphoglycerate mutase activity	GO:0006007//glucose catabolic process	gi|229463024|sp|P82612.3|PMGY_CANAL/6.9511e-133/RecName: Full=Phosphoglycerate mutase; Short=PGAM; AltName: Full=BPG-dependent PGAM; AltName: Full=MPGM; AltName: Full=Phosphoglyceromutase
orf19.6302	846	25	6	3.17404	0.72805	-2.12421	Down	0.000333706	0.000558827	-	-	-	gi|238879948|gb|EEQ43586.1|/4.70392e-30/predicted protein [Candida albicans WO-1]
orf19.7336	1815	50	12	2.95894	0.678711	-2.12421	Down	2.99876e-07	6.23196e-07	-	-	GO:0006810//transport	gi|68479072|ref|XP_716470.1|/0/potential MFS-MDR transporter [Candida albicans SC5314]
orf19.5753	1641	207	50	13.5489	3.12782	-2.11495	Down	1.13425e-25	6.42709e-25	GO:0031224//intrinsic to membrane	GO:0022857//transmembrane transporter activity	GO:0071702	gi|68475765|ref|XP_718089.1|/0/hypothetical protein CaO19.5753 [Candida albicans SC5314]
orf19.398	474	1077	262	244.051	56.7418	-2.1047	Down	7.331e-126	6.77065e-125	-	-	-	gi|68488463|ref|XP_711915.1|/1.31711e-83/hypothetical protein CaO19.8028 [Candida albicans SC5314]
orf19.4942	369	41	10	11.9344	2.78198	-2.10094	Down	4.2812e-06	8.31488e-06	-	-	-	gi|68467211|ref|XP_722267.1|/1.15827e-66/hypothetical protein CaO19.12408 [Candida albicans SC5314]
orf19.7379	2265	668	163	31.6775	7.38753	-2.10029	Down	1.51129e-78	1.20942e-77	-	GO:0015645//fatty acid ligase activity	-	gi|68478703|ref|XP_716620.1|/0/potential long chain fatty acyl-CoA synthetase [Candida albicans SC5314]
orf19.2308	1086	4344	1061	429.638	100.292	-2.09892	Down	0	0	-	GO:0008443//phosphofructokinase activity;GO:0032559	GO:0006000//fructose metabolic process	gi|68484158|ref|XP_713971.1|/0/hypothetical protein CaO19.9844 [Candida albicans SC5314]
orf19.3651	1254	57257	14006	4904.26	1146.56	-2.09673	Down	0	0	GO:0044424//intracellular part	GO:0016301//kinase activity;GO:0032559	GO:0006796//phosphate-containing compound metabolic process;GO:0006007//glucose catabolic process	gi|1172452|sp|P46273.1|PGK_CANAL/0/RecName: Full=Phosphoglycerate kinase
orf19.164	1206	545	135	48.5391	11.4912	-2.07861	Down	1.42554e-63	1.07469e-62	-	-	-	gi|68490958|ref|XP_710701.1|/0/potential peroxisomal matrix protein [Candida albicans SC5314]
orf19.1070	951	88	22	9.93905	2.37477	-2.06532	Down	2.02694e-11	5.22018e-11	-	-	-	gi|68484815|ref|XP_713719.1|/3.81562e-151/hypothetical protein CaO19.8672 [Candida albicans SC5314]
orf19.149	438	32	8	7.84727	1.87498	-2.06532	Down	6.22906e-05	0.000110422	-	-	-	gi|68491185|ref|XP_710600.1|/4.76424e-28/hypothetical protein CaO19.149 [Candida albicans SC5314]
orf19.6840	522	116	29	23.8688	5.70306	-2.06532	Down	1.28397e-14	5.94713e-14	-	-	-	gi|68487774|ref|XP_712228.1|/9.91168e-79/hypothetical protein CaO19.6840 [Candida albicans SC5314]
orf19.5780	2022	1029	258	54.6609	13.0984	-2.06112	Down	3.58652e-117	3.23899e-116	GO:0031224//intrinsic to membrane	-	-	gi|68481364|ref|XP_715321.1|/0/hypothetical protein CaO19.5780 [Candida albicans SC5314]
orf19.59	1146	483	122	45.2695	10.9284	-2.05046	Down	1.42246e-55	1.03166e-54	-	-	-	gi|238879033|gb|EEQ42671.1|/5.94274e-160/conserved hypothetical protein [Candida albicans WO-1]
orf19.2989	1029	771	195	80.4789	19.4536	-2.04857	Down	1.442e-87	1.20773e-86	-	GO:0008875;GO:0000166//nucleotide binding	GO:0008152//metabolic process	gi|68468857|ref|XP_721487.1|/0/potential D-isomer specific 2-hydroxyacid dehydrogenase [Candida albicans SC5314]
orf19.3038	2667	16673	4230	671.481	162.816	-2.0441	Down	0	0	-	GO:0019203//carbohydrate phosphatase activity	GO:0005991//trehalose metabolic process	gi|11557981|emb|CAC17748.1|/0/trehalose-6-phosphate phosphatase [Candida albicans]
orf19.1861	1875	3679	936	210.752	51.2454	-2.04005	Down	0	0	-	-	-	-
orf19.1366	1260	43	11	3.66556	0.896194	-2.03215	Down	4.0109e-06	7.8023e-06	-	GO:0003824//catalytic activity	GO:0008152//metabolic process	gi|68482820|ref|XP_714636.1|/0/hypothetical protein CaO19.8946 [Candida albicans SC5314]
orf19.5908	2232	774	198	37.2469	9.10649	-2.03215	Down	5.32178e-87	4.43893e-86	GO:0043231//intracellular membrane-bounded organelle	GO:0001071//nucleic acid binding transcription factor activity	GO:0006351//transcription, DNA-dependent	gi|68465521|ref|XP_723122.1|/0/potential TEA/ATTS type DNA binding protein [Candida albicans SC5314]
orf19.6881	648	5247	1344	869.719	212.914	-2.03028	Down	0	0	GO:0043231//intracellular membrane-bounded organelle	GO:0046914//transition metal ion binding;GO:0003676//nucleic acid binding	GO:0006396//RNA processing	gi|68486577|ref|XP_712839.1|/3.78788e-123/potential polyadenylation factor subunit [Candida albicans SC5314]
orf19.2655	1122	2493	641	238.656	58.6469	-2.0248	Down	1.05679e-274	1.1684e-273	-	-	-	gi|68488195|ref|XP_712058.1|/0/hypothetical protein CaO19.10178 [Candida albicans SC5314]
orf19.1307	1503	439	113	31.3724	7.71791	-2.02322	Down	8.13154e-50	5.66244e-49	GO:0044464//cell part	-	-	gi|68486199|ref|XP_709948.1|/0/hypothetical protein CaO19.1307 [Candida albicans SC5314]
orf19.1276	507	159	41	33.6846	8.30149	-2.02065	Down	5.29302e-19	2.71489e-18	-	GO:0005488//binding	GO:0019725//cellular homeostasis	gi|68478844|ref|XP_716584.1|/5.41215e-79/hypothetical protein CaO19.1276 [Candida albicans SC5314]
orf19.24	1362	442	114	34.8568	8.59227	-2.02033	Down	4.69674e-50	3.28181e-49	GO:0031224//intrinsic to membrane	-	GO:0050896//response to stimulus	gi|68488645|ref|XP_711831.1|/0/potential phospholipid-translocating ATPase [Candida albicans SC5314]
orf19.7283	369	31	8	9.02356	2.22558	-2.01951	Down	0.000103412	0.000180286	-	-	-	gi|68478968|ref|XP_716418.1|/6.57703e-62/hypothetical protein CaO19.7283 [Candida albicans SC5314]
orf19.1667.1	267	62	16	24.9415	6.15161	-2.01951	Down	3.14836e-08	6.93161e-08	-	-	-	gi|238880606|gb|EEQ44244.1|/3.7152e-28/predicted protein [Candida albicans WO-1]
orf19.4526	1029	379	98	39.5609	9.77667	-2.01666	Down	4.65966e-43	3.10002e-42	GO:0044464//cell part	GO:0015075//ion transmembrane transporter activity	GO:0050896//response to stimulus;GO:0006810//transport	gi|68486305|ref|XP_712951.1|/0/hypothetical protein CaO19.4526 [Candida albicans SC5314]
orf19.1354	606	25198	6534	4466.18	1106.84	-2.01259	Down	0	0	GO:0016020//membrane	-	-	gi|74584088|sp|Q59KG2.1|RGI1_CANAL/7.07659e-118/RecName: Full=Respiratory growth induced protein 1
orf19.4085	642	180	47	30.1148	7.51524	-2.00258	Down	4.36726e-21	2.32388e-20	-	-	-	gi|68483606|ref|XP_714256.1|/1.74663e-72/hypothetical protein CaO19.4085 [Candida albicans SC5314]
orf19.6601	1209	1925	503	171.02	42.7092	-2.00155	Down	2.14074e-209	2.22215e-208	-	-	-	gi|238880333|gb|EEQ43971.1|/1.41129e-74/conserved hypothetical protein [Candida albicans WO-1]
orf19.4379	2604	1123	296	46.3214	11.6689	-1.98901	Down	5.85214e-122	5.34828e-121	GO:0016020//membrane	GO:0005488//binding;GO:0004518//nuclease activity	-	gi|68481773|ref|XP_715128.1|/0/potential mitochondrial maintenance protein [Candida albicans SC5314]
orf19.2962	888	121	32	14.6358	3.69928	-1.98418	Down	1.72997e-14	7.9288e-14	-	-	-	gi|68468805|ref|XP_721461.1|/1.35693e-123/hypothetical protein CaO19.2962 [Candida albicans SC5314]
orf19.6600	591	449	119	81.6022	20.67	-1.98107	Down	1.44571e-49	1.00444e-48	-	-	-	gi|189093890|ref|XP_443374.1|/7.11616e-112/potential intramitochondrial sorting family protein [Candida albicans SC5314]
orf19.2667	891	914	245	110.182	28.2272	-1.96473	Down	5.02418e-98	4.35097e-97	-	GO:0016876//ligase activity, forming aminoacyl-tRNA and related compounds;GO:0032559	GO:0010467//gene expression	gi|68470826|ref|XP_720420.1|/3.45479e-143/likely nucleolar ribosomal biogenesis factor RPF1p [Candida albicans SC5314]
orf19.1632	1218	816	219	71.9591	18.4577	-1.96296	Down	1.31733e-87	1.10482e-86	-	GO:0004559//alpha-mannosidase activity	-	gi|68468299|ref|XP_721709.1|/0/potential alpha-1,6-mannanase [Candida albicans SC5314]
orf19.583	1323	3278	886	266.129	68.747	-1.95276	Down	0	0	-	GO:0005506//iron ion binding;GO:0016701//oxidoreductase activity, acting on single donors with incorporation of molecular oxygen	GO:0008152//metabolic process	gi|68483703|ref|XP_714210.1|/0/hypothetical protein CaO19.583 [Candida albicans SC5314]
orf19.691	1116	9293	2517	894.406	231.526	-1.94976	Down	0	0	GO:0043234//protein complex;GO:0044424//intracellular part	GO:0042802//identical protein binding;GO:0016616//oxidoreductase activity, acting on the CH-OH group of donors, NAD or NADP as acceptor;GO:0048037//cofactor binding;GO:0000166//nucleotide binding	GO:0006072//glycerol-3-phosphate metabolic process	gi|68484511|ref|XP_713866.1|/0/likely glycerol-3-phosphate dehydrogenase [Candida albicans SC5314]
orf19.3585	393	210	57	57.3944	14.8889	-1.94667	Down	1.6402e-23	9.01007e-23	-	GO:0016741	GO:0006730//one-carbon metabolic process	gi|68483093|ref|XP_714482.1|/1.86682e-72/hypothetical protein CaO19.11069 [Candida albicans SC5314]
orf19.7060	975	534	145	58.8274	15.2666	-1.9461	Down	2.69566e-57	1.9738e-56	-	-	-	gi|68471151|ref|XP_720352.1|/1.35687e-175/hypothetical protein CaO19.7060 [Candida albicans SC5314]
orf19.7499	1206	6076	1651	541.145	140.533	-1.9451	Down	0	0	-	GO:0070566//adenylyltransferase activity	GO:0019359	gi|68474566|ref|XP_718656.1|/0/hypothetical protein CaO19.7499 [Candida albicans SC5314]
orf19.1785	981	15189	4149	1663.04	434.165	-1.93751	Down	0	0	-	-	-	gi|68483377|ref|XP_714430.1|/3.51766e-147/hypothetical protein CaO19.1785 [Candida albicans SC5314]
orf19.1614	1608	212	58	14.161	3.70273	-1.93526	Down	1.50934e-23	8.3061e-23	GO:0031224//intrinsic to membrane	GO:0015101//organic cation transmembrane transporter activity	GO:0015696//ammonium transport	gi|68468267|ref|XP_721693.1|/0/hypothetical protein CaO19.1614 [Candida albicans SC5314]
orf19.3160	384	600	165	167.827	44.1096	-1.92781	Down	2.2248e-63	1.67106e-62	-	-	GO:0050896//response to stimulus	gi|238882609|gb|EEQ46247.1|/5.49124e-64/conserved hypothetical protein [Candida albicans WO-1]
orf19.1047	2550	1107	307	46.6284	12.3589	-1.91566	Down	1.87759e-114	1.68818e-113	GO:0031981//nuclear lumen	-	GO:0042254//ribosome biogenesis	gi|74679771|sp|Q59VP7.1|ERB1_CANAL/0/RecName: Full=Ribosome biogenesis protein ERB1; AltName: Full=Eukaryotic ribosome biogenesis protein 1
orf19.97	1716	943	262	59.0252	15.6734	-1.91301	Down	1.36225e-97	1.17638e-96	GO:0031224//intrinsic to membrane	GO:0005275//amine transmembrane transporter activity	GO:0006865//amino acid transport	gi|68483491|ref|XP_714306.1|/0/arginine, lysine, histidine permease Can1p [Candida albicans SC5314]
orf19.4631	966	5791	1611	643.901	171.198	-1.91117	Down	0	0	GO:0031224//intrinsic to membrane	GO:0046914//transition metal ion binding;GO:0003824//catalytic activity	GO:0006631//fatty acid metabolic process	gi|68466149|ref|XP_722849.1|/0/potential C-4 sterol methyl oxidase [Candida albicans SC5314]
orf19.5059	2319	715	199	33.1168	8.80912	-1.91049	Down	2.64744e-74	2.0646e-73	-	GO:0016881//acid-amino acid ligase activity	GO:0006749//glutathione metabolic process	gi|241949335|ref|XP_002417390.1|/0/gamma-glutamylcysteine synthetase, putative; glutamate-cysteine ligase, putative [Candida dubliniensis CD36]
orf19.7405	705	524	146	79.8335	21.259	-1.90892	Down	7.34442e-55	5.30151e-54	-	-	-	gi|68479801|ref|XP_716070.1|/4.9662e-122/hypothetical protein CaO19.7405 [Candida albicans SC5314]
orf19.2060	687	50	14	7.81729	2.09195	-1.90182	Down	1.87638e-06	3.72594e-06	-	GO:0003824//catalytic activity;GO:0016209//antioxidant activity;GO:0043169//cation binding	GO:0072593//reactive oxygen species metabolic process	gi|238881881|gb|EEQ45519.1|/3.62573e-98/conserved hypothetical protein [Candida albicans WO-1]
orf19.5348	3024	13748	3852	488.316	130.763	-1.90086	Down	0	0	-	GO:0016740//transferase activity	GO:0005991//trehalose metabolic process	gi|238883912|gb|EEQ47550.1|/0/conserved hypothetical protein [Candida albicans WO-1]
orf19.6081	1635	7251	2047	476.346	128.523	-1.88999	Down	0	0	GO:0016020//membrane	GO:0043167//ion binding	GO:0044238//primary metabolic process	gi|68473880|ref|XP_719043.1|/0/C. albicans pH regulated cell wall protein Phr2p [Candida albicans SC5314]
orf19.4618	1080	56217	15950	5590.96	1516.06	-1.88277	Down	0	0	-	GO:0046914//transition metal ion binding;GO:0016832//aldehyde-lyase activity	GO:0006007//glucose catabolic process	gi|224471817|sp|Q9URB4.2|ALF_CANAL/0/RecName: Full=Fructose-bisphosphate aldolase; Short=FBP aldolase; Short=FBPA; AltName: Full=37 kDa major allergen; AltName: Full=Fructose-1,6-bisphosphate aldolase; AltName: Full=IgE-binding allergen
orf19.5417	792	1785	509	242.078	65.974	-1.8755	Down	3.04512e-178	3.03717e-177	-	GO:0016705//oxidoreductase activity, acting on paired donors, with incorporation or reduction of molecular oxygen;GO:0016209//antioxidant activity	GO:0008152//metabolic process;GO:0019725//cellular homeostasis	gi|68476279|ref|XP_717789.1|/9.76258e-120/potential nuclear thioredoxin peroxidase [Candida albicans SC5314]
orf19.7251	1476	2084	595	151.654	41.3819	-1.87371	Down	1.68826e-207	1.7495e-206	-	-	-	gi|68482063|ref|XP_715049.1|/0/hypothetical protein CaO19.7251 [Candida albicans SC5314]
orf19.2517	1647	63	18	4.10856	1.12191	-1.87267	Down	1.12809e-07	2.40151e-07	-	-	GO:0006810//transport	gi|68475134|ref|XP_718285.1|/0/potential ion transporter [Candida albicans SC5314]
orf19.2803	972	7494	2154	828.114	227.489	-1.86404	Down	0	0	-	GO:0016634	GO:0006778//porphyrin-containing compound metabolic process	gi|238880812|gb|EEQ44450.1|/0/coproporphyrinogen III oxidase [Candida albicans WO-1]
orf19.1585	1113	65328	18824	6304.45	1736.19	-1.86045	Down	0	0	GO:0031224//intrinsic to membrane	GO:0046915//transition metal ion transmembrane transporter activity	GO:0006829//zinc ion transport	gi|238882057|gb|EEQ45695.1|/0/hypothetical protein CAWG_04027 [Candida albicans WO-1]
orf19.2608	1011	7887	2278	837.922	231.304	-1.85703	Down	0	0	-	GO:0046914//transition metal ion binding;GO:0004033//aldo-keto reductase (NADP) activity	GO:0008152//metabolic process	gi|238879682|gb|EEQ43320.1|/1.68614e-176/hypothetical protein CAWG_01554 [Candida albicans WO-1]
orf19.2756	639	45	13	7.56405	2.08844	-1.85673	Down	8.8082e-06	1.66935e-05	GO:0043231//intracellular membrane-bounded organelle;GO:0031224//intrinsic to membrane	GO:0005048//signal sequence binding;GO:0004871//signal transducer activity	GO:0035437//maintenance of protein localization in endoplasmic reticulum;GO:0006810//transport	gi|238881596|gb|EEQ45234.1|/2.46625e-111/ER lumen protein retaining receptor [Candida albicans WO-1]
orf19.6245	1701	3029	879	191.266	53.0475	-1.85022	Down	1.462e-295	1.63712e-294	-	-	GO:0006810//transport	gi|68474250|ref|XP_718834.1|/0/hypothetical protein CaO19.6245 [Candida albicans SC5314]
orf19.5674	753	31	9	4.42191	1.22695	-1.84959	Down	0.000249622	0.000420902	-	-	-	gi|68485449|ref|XP_713402.1|/1.44277e-85/potential cell surface antigen [Candida albicans SC5314]
orf19.3521	795	890	259	120.245	33.4436	-1.84617	Down	6.05858e-88	5.08821e-87	-	GO:0008937//ferredoxin-NAD(P) reductase activity	GO:0008152//metabolic process	gi|238882267|gb|EEQ45905.1|/9.13896e-142/hypothetical protein CAWG_04244 [Candida albicans WO-1]
orf19.3088	540	79	23	15.7136	4.37234	-1.84554	Down	3.85492e-09	8.92426e-09	GO:0044424//intracellular part	-	-	gi|68481106|ref|XP_715468.1|/3.5301e-77/hypothetical protein CaO19.10600 [Candida albicans SC5314]
orf19.251	711	16452	4796	2485.37	692.452	-1.84368	Down	0	0	-	GO:0016787//hydrolase activity	GO:0050896//response to stimulus	gi|68471814|ref|XP_719950.1|/5.20597e-135/hypothetical protein CaO19.251 [Candida albicans SC5314]
orf19.7445	1488	4408	1285	318.186	88.6503	-1.84367	Down	0	0	-	-	-	gi|68479876|ref|XP_716106.1|/0/hypothetical protein CaO19.7445 [Candida albicans SC5314]
orf19.5557	2619	113	33	4.63432	1.29348	-1.8411	Down	1.8496e-12	5.69695e-12	-	GO:0016740//transferase activity	-	gi|68473358|ref|XP_719237.1|/0/hypothetical protein CaO19.13003 [Candida albicans SC5314]
orf19.6117	1341	2172	635	173.97	48.6099	-1.83951	Down	7.58326e-211	7.88504e-210	GO:0031224//intrinsic to membrane	-	GO:0006810//transport	gi|68487480|ref|XP_712361.1|/0/potential Auxin Efflux Carrier protein [Candida albicans SC5314]
orf19.6874	1824	4491	1321	264.461	74.3461	-1.83072	Down	0	0	-	-	-	gi|68486563|ref|XP_712832.1|/0/hypothetical protein CaO19.14163 [Candida albicans SC5314]
orf19.5228	624	3728	1099	641.703	180.798	-1.82753	Down	0	0	-	GO:0046914//transition metal ion binding;GO:0016830//carbon-carbon lyase activity	GO:0006771	gi|238878370|gb|EEQ42008.1|/6.57249e-106/3,4-dihydroxy-2-butanone 4-phosphate synthase [Candida albicans WO-1]
orf19.353	1056	274	81	27.8695	7.8741	-1.8235	Down	8.79146e-28	5.11427e-27	-	GO:0070011	GO:0019538//protein metabolic process	gi|68471749|ref|XP_720181.1|/0/potential ubiquitin-like protein-specific protease [Candida albicans SC5314]
orf19.3826	849	2141	634	270.864	76.6587	-1.82105	Down	5.0122e-205	5.17645e-204	-	-	-	gi|68477359|ref|XP_717306.1|/2.34812e-146/hypothetical protein CaO19.11307 [Candida albicans SC5314]
orf19.6601.1	504	3187	946	679.195	192.682	-1.81761	Down	2.09568e-303	2.36839e-302	-	-	-	gi|238880332|gb|EEQ43970.1|/1.88791e-76/conserved hypothetical protein [Candida albicans WO-1]
orf19.391	2139	2919	867	146.577	41.6091	-1.81669	Down	7.11578e-278	7.8815e-277	GO:0043231//intracellular membrane-bounded organelle	GO:0046914//transition metal ion binding;GO:0001071//nucleic acid binding transcription factor activity	GO:0006351//transcription, DNA-dependent	gi|190333339|gb|ACE73662.1|/0/Upc2 [Candida albicans]
orf19.3759	1341	464	138	37.1648	10.564	-1.81477	Down	1.23421e-45	8.40309e-45	GO:0043234//protein complex	-	GO:0006355//regulation of transcription, DNA-dependent	gi|68490788|ref|XP_710789.1|/0/hypothetical protein CaO19.3759 [Candida albicans SC5314]
orf19.158	927	84	25	9.7329	2.76847	-1.81378	Down	1.92466e-09	4.50512e-09	-	-	-	gi|68492497|ref|XP_710000.1|/3.88782e-169/potential actin patch localization protein [Candida albicans SC5314]
orf19.6640	1437	3305	984	247.034	70.294	-1.81324	Down	0	0	-	GO:0035251//UDP-glucosyltransferase activity	GO:0005991//trehalose metabolic process	gi|2499019|sp|Q92410.1|TPS1_CANAL/0/RecName: Full=Alpha,alpha-trehalose-phosphate synthase [UDP-forming]; AltName: Full=Trehalose-6-phosphate synthase; AltName: Full=UDP-glucose-glucosephosphate glucosyltransferase
orf19.5620	930	544	162	62.8288	17.8818	-1.81293	Down	3.86776e-53	2.76579e-52	-	GO:0003824//catalytic activity	-	gi|68473711|ref|XP_719180.1|/1.0287e-169/hypothetical protein CaO19.5620 [Candida albicans SC5314]
orf19.4791	2931	1430	427	52.4038	14.9552	-1.80903	Down	2.35272e-136	2.213e-135	-	-	-	gi|68464799|ref|XP_723477.1|/0/hypothetical protein CaO19.4791 [Candida albicans SC5314]
orf19.2445	1647	154	46	10.0431	2.86711	-1.80854	Down	4.18058e-16	2.01102e-15	GO:0031224//intrinsic to membrane	GO:0005275//amine transmembrane transporter activity	GO:0006865//amino acid transport	gi|68474687|ref|XP_718551.1|/0/potential dicarboxylic amino acid permease [Candida albicans SC5314]
orf19.809	1365	527	158	41.4687	11.8824	-1.8032	Down	3.66372e-51	2.57175e-50	-	GO:0005488//binding	-	gi|74680276|sp|Q5AHI7.1|NOP12_CANAL/0/RecName: Full=Nucleolar protein 12
orf19.5399	1536	60	18	4.19568	1.20299	-1.80228	Down	4.62272e-07	9.4907e-07	-	-	-	gi|68476249|ref|XP_717774.1|/0/hypothetical protein CaO19.5399 [Candida albicans SC5314]
orf19.4266	1182	90	27	8.17839	2.34491	-1.80228	Down	6.0238e-10	1.44316e-09	GO:0032156	GO:0032561//guanyl ribonucleotide binding	GO:0009987//cellular process	gi|241955631|ref|XP_002420536.1|/9.0285e-143/meiotic septin, putative; sporulation-regulated protein, putative [Candida dubliniensis CD36]
orf19.1287	1143	1348	406	126.674	36.4636	-1.79659	Down	1.93387e-127	1.79419e-126	-	-	-	gi|68491066|ref|XP_710668.1|/9.87076e-123/hypothetical protein CaO19.1287 [Candida albicans SC5314]
orf19.6816	849	1882	567	238.097	68.5576	-1.79616	Down	4.24002e-177	4.20836e-176	-	GO:0003824//catalytic activity	GO:0008152//metabolic process	gi|68472229|ref|XP_719910.1|/2.94979e-165/potential aldo/keto reductase [Candida albicans SC5314]
orf19.4517	1233	73	22	6.3592	1.83164	-1.79571	Down	2.79002e-08	6.14931e-08	-	-	-	gi|68486414|ref|XP_712942.1|/0/potential COP9 signalosome subunit 7 [Candida albicans SC5314]
orf19.5063	576	348	105	64.8933	18.7132	-1.79402	Down	4.0682e-34	2.53806e-33	-	-	-	gi|68476617|ref|XP_717601.1|/8.56047e-107/hypothetical protein CaO19.5063 [Candida albicans SC5314]
orf19.4760	1464	232	70	17.0212	4.90837	-1.79402	Down	2.8766e-23	1.57736e-22	-	-	-	gi|68464737|ref|XP_723446.1|/0/hypothetical protein CaO19.4760 [Candida albicans SC5314]
orf19.425	594	142	43	25.677	7.43125	-1.7888	Down	9.27106e-15	4.33027e-14	-	GO:0008079//translation termination factor activity	GO:0006412//translation	gi|68480199|ref|XP_715910.1|/1.55906e-98/hypothetical protein CaO19.8055 [Candida albicans SC5314]
orf19.776	1908	122	37	6.8679	1.99069	-1.7866	Down	7.35714e-13	2.45532e-12	-	-	-	gi|68485040|ref|XP_713586.1|/0/potential nuclear cohesin complex subunit [Candida albicans SC5314]
orf19.7552	2619	1328	403	54.4635	15.7961	-1.78572	Down	1.53732e-124	1.41129e-123	-	-	-	gi|68473017|ref|XP_719314.1|/0/hypothetical protein CaO19.7552 [Candida albicans SC5314]
orf19.6978	330	56	17	18.2271	5.28829	-1.78521	Down	1.32527e-06	2.65141e-06	-	-	-	gi|68482749|ref|XP_714684.1|/3.28098e-45/hypothetical protein CaO19.6978 [Candida albicans SC5314]
orf19.1026.1	270	46	14	18.2994	5.32285	-1.78153	Down	1.2475e-05	2.33748e-05	-	-	-	gi|241948615|ref|XP_002417030.1|/7.95879e-39/conserved hypothetical protein [Candida dubliniensis CD36]
orf19.2892	2637	2157	660	87.8583	25.6929	-1.77381	Down	3.2227e-199	3.30597e-198	-	-	-	gi|68480902|ref|XP_715604.1|/0/hypothetical protein CaO19.10410 [Candida albicans SC5314]
orf19.1745	495	49	15	10.6325	3.11076	-1.77314	Down	6.88256e-06	1.31706e-05	-	-	-	gi|68483299|ref|XP_714391.1|/1.64556e-77/hypothetical LDG family protein 1 [Candida albicans SC5314]
orf19.1580	2112	160	49	8.13709	2.38167	-1.77254	Down	2.92952e-16	1.41702e-15	-	-	-	gi|68466853|ref|XP_722622.1|/0/hypothetical YFW family protein 3 [Candida albicans SC5314]
orf19.7029	1833	75	23	4.39483	1.28809	-1.77057	Down	2.46292e-08	5.44801e-08	-	GO:0016787//hydrolase activity	-	gi|68471093|ref|XP_720323.1|/0/hypothetical protein CaO19.7029 [Candida albicans SC5314]
orf19.4185	456	393	121	92.5701	27.2396	-1.76484	Down	1.71594e-37	1.10784e-36	-	-	-	gi|68486723|ref|XP_712790.1|/1.73508e-87/possible protein phosphatase [Candida albicans SC5314]
orf19.6814	1008	442004	136504	47098.7	13901.6	-1.76043	Down	0	0	GO:0044424//intracellular part	GO:0000166//nucleotide binding	GO:0006007//glucose catabolic process	gi|68472227|ref|XP_719909.1|/0/glyceraldehyde-3-phosphate dehydrogenase [Candida albicans SC5314]
orf19.2372	4701	77569	23967	1772.31	523.364	-1.75975	Down	0	0	-	-	-	gi|77022864|ref|XP_888876.1|/0/hypothetical protein CaO19_6451 [Candida albicans SC5314]
orf19.5683	417	307	95	79.0761	23.3866	-1.75756	Down	1.76885e-29	1.05202e-28	GO:0031224//intrinsic to membrane	-	-	gi|68491350|ref|XP_710512.1|/5.87759e-66/hypothetical protein CaO19.5683 [Candida albicans SC5314]
orf19.7069	732	45	14	6.60304	1.96335	-1.74982	Down	1.98174e-05	3.65611e-05	-	GO:0016741	GO:0006730//one-carbon metabolic process	gi|68471169|ref|XP_720361.1|/1.3419e-141/hypothetical protein CaO19.7069 [Candida albicans SC5314]
orf19.4216	384	568	177	158.877	47.3175	-1.74746	Down	9.92276e-53	7.0626e-52	-	-	GO:0050896//response to stimulus	gi|238882611|gb|EEQ46249.1|/9.36663e-64/conserved hypothetical protein [Candida albicans WO-1]
orf19.7235	2679	2543	793	101.957	30.3865	-1.74646	Down	1.66717e-229	1.78201e-228	-	-	-	gi|68482035|ref|XP_715035.1|/0/hypothetical protein CaO19.7235 [Candida albicans SC5314]
orf19.2620	687	131	41	20.4813	6.12643	-1.74119	Down	2.83534e-13	1.07273e-12	-	-	-	gi|238880126|gb|EEQ43764.1|/3.19847e-70/conserved hypothetical protein [Candida albicans WO-1]
orf19.3699	1161	51	16	4.71825	1.41471	-1.73774	Down	6.01668e-06	1.15752e-05	-	GO:0004721//phosphoprotein phosphatase activity	GO:0006796//phosphate-containing compound metabolic process	gi|68490842|ref|XP_710767.1|/0/hypothetical protein CaO19.11183 [Candida albicans SC5314]
orf19.100	1053	449	141	45.7995	13.7458	-1.73634	Down	1.12196e-41	7.40782e-41	-	GO:0004091//carboxylesterase activity	GO:0044238//primary metabolic process	gi|68483497|ref|XP_714309.1|/0/potential secreted triacylglycerol lipase [Candida albicans SC5314]
orf19.6596	912	4663	1465	549.178	164.901	-1.73568	Down	0	0	GO:0031410//cytoplasmic vesicle	GO:0016790//thiolester hydrolase activity	-	gi|238880338|gb|EEQ43976.1|/3.53127e-175/esterase D [Candida albicans WO-1]
orf19.1362	1302	216	68	17.8191	5.3614	-1.73274	Down	8.21984e-21	4.34741e-20	-	GO:0016627//oxidoreductase activity, acting on the CH-CH group of donors;GO:0050662//coenzyme binding	GO:0006399//tRNA metabolic process	gi|68482812|ref|XP_714632.1|/0/potential tRNA dihydrouridine synthase [Candida albicans SC5314]
orf19.3978	714	130	41	19.5564	5.89475	-1.73013	Down	4.44048e-13	1.58119e-12	-	-	-	gi|74587473|sp|Q5AK42.1|EFG1P_CANAL/3.61923e-112/RecName: Full=rRNA-processing protein EFG1
orf19.7330	714	271	86	40.7675	12.3646	-1.7212	Down	1.70441e-25	9.61323e-25	-	-	-	gi|68479060|ref|XP_716464.1|/4.55716e-123/hypothetical protein CaO19.7330 [Candida albicans SC5314]
orf19.4749	1677	635	203	40.6709	12.4263	-1.71059	Down	4.64228e-57	3.38698e-56	-	-	-	gi|238878691|gb|EEQ42329.1|/0/conserved hypothetical protein [Candida albicans WO-1]
orf19.5551	1563	2193	702	150.703	46.1061	-1.70868	Down	3.09456e-192	3.14288e-191	-	-	-	gi|68473346|ref|XP_719231.1|/0/hypothetical protein CaO19.12997 [Candida albicans SC5314]
orf19.1855	1815	109	35	6.45049	1.97957	-1.70422	Down	5.51594e-11	1.38272e-10	-	-	GO:0006810//transport	gi|68490208|ref|XP_711084.1|/0/potential transporter [Candida albicans SC5314]
orf19.1327	2166	109	35	5.40519	1.65878	-1.70422	Down	5.51594e-11	1.38215e-10	-	-	-	gi|68486235|ref|XP_709966.1|/1.65385e-149/potential cell surface protein [Candida albicans SC5314]
orf19.7225	1572	402	130	27.4673	8.48928	-1.694	Down	2.93026e-36	1.87598e-35	-	-	-	gi|68482017|ref|XP_715026.1|/0/hypothetical protein CaO19.7225 [Candida albicans SC5314]
orf19.6828	828	68	22	8.82107	2.72755	-1.69335	Down	2.70888e-07	5.63912e-07	GO:0030684//preribosome	-	GO:0042254//ribosome biogenesis	gi|68472249|ref|XP_719920.1|/1.33462e-130/hypothetical protein CaO19.6828 [Candida albicans SC5314]
orf19.2158	1686	454	147	28.9229	8.95035	-1.69219	Down	1.11984e-40	7.33839e-40	-	-	GO:0006810//transport	gi|238882926|gb|EEQ46564.1|/0/hypothetical protein CAWG_04920 [Candida albicans WO-1]
orf19.4739	2007	988	320	52.8752	16.3675	-1.69176	Down	1.88804e-86	1.56841e-85	-	GO:0042623//ATPase activity, coupled;GO:0032559	-	gi|74680423|sp|Q5APM7.1|MS116_CANAL/0/RecName: Full=ATP-dependent RNA helicase MSS116, mitochondrial; Flags: Precursor
orf19.3884	735	497	161	72.6293	22.4863	-1.6915	Down	2.39654e-44	1.61371e-43	-	-	-	gi|68485121|ref|XP_713550.1|/5.92355e-113/hypothetical protein CaO19.11365 [Candida albicans SC5314]
orf19.6757	888	552	179	66.7681	20.6928	-1.69003	Down	5.22446e-49	3.6093e-48	-	GO:0003824//catalytic activity	GO:0008152//metabolic process	gi|68472117|ref|XP_719854.1|/8.97602e-168/hypothetical protein CaO19.6757 [Candida albicans SC5314]
orf19.882	2439	3318	1080	146.119	45.4561	-1.6846	Down	4.66116e-284	5.19095e-283	-	GO:0017111//nucleoside-triphosphatase activity;GO:0032559	GO:0050896//response to stimulus;GO:0009207	gi|31076745|sp|Q96UX5.1|HSP78_CANAL/0/RecName: Full=Heat shock protein 78, mitochondrial; Flags: Precursor
orf19.6246	567	384	125	72.743	22.6312	-1.6845	Down	1.90817e-34	1.19412e-33	-	GO:0008080//N-acetyltransferase activity	-	gi|68474252|ref|XP_718835.1|/1.89241e-103/potential peptidyl-methionine N-acetyl tranferase (GNAT family) [Candida albicans SC5314]
orf19.3621	1236	86	28	7.47348	2.32552	-1.68423	Down	7.9754e-09	1.81878e-08	-	-	-	gi|68483256|ref|XP_714463.1|/6.69294e-112/hypothetical protein CaO19.3621 [Candida albicans SC5314]
orf19.395	1323	129674	42289	10527.8	3281.31	-1.68185	Down	0	0	GO:0043234//protein complex;GO:0044424//intracellular part	GO:0046872//metal ion binding;GO:0016836//hydro-lyase activity	GO:0006007//glucose catabolic process	gi|232054|sp|P30575.1|ENO1_CANAL/0/RecName: Full=Enolase 1; AltName: Full=2-phospho-D-glycerate hydro-lyase; AltName: Full=2-phosphoglycerate dehydratase
orf19.6736	1890	603	197	34.2688	10.7	-1.67928	Down	6.53282e-53	4.66064e-52	-	-	-	gi|68472077|ref|XP_719834.1|/0/potential mitochondrial protein Fmp38 [Candida albicans SC5314]
orf19.4752	2277	5793	1898	273.265	85.5684	-1.67515	Down	0	0	GO:0044464//cell part	GO:0046914//transition metal ion binding	-	gi|68464721|ref|XP_723438.1|/0/potential zinc finger transcription factor [Candida albicans SC5314]
orf19.5813	558	2288	750	440.418	137.977	-1.67444	Down	7.64646e-195	7.8178e-194	-	GO:0046914//transition metal ion binding	-	gi|68481430|ref|XP_715354.1|/4.78876e-88/hypothetical protein CaO19.5813 [Candida albicans SC5314]
orf19.4580	534	186	61	37.4123	11.7265	-1.67374	Down	2.46636e-17	1.22298e-16	-	-	-	gi|68466045|ref|XP_722797.1|/1.57589e-98/hypothetical protein CaO19.12049 [Candida albicans SC5314]
orf19.4657	1503	2769	912	197.882	62.2897	-1.66758	Down	5.18844e-234	5.56528e-233	-	-	-	gi|68466199|ref|XP_722874.1|/0/hypothetical protein CaO19.12127 [Candida albicans SC5314]
orf19.6387	2700	16273	5368	647.361	204.093	-1.66534	Down	0	0	-	GO:0016462//pyrophosphatase activity;GO:0032559	GO:0050896//response to stimulus;GO:0043170;GO:0044238//primary metabolic process	gi|238880223|gb|EEQ43861.1|/0/heat shock protein 104 [Candida albicans WO-1]
orf19.1034	552	699	231	136.013	42.9589	-1.66272	Down	3.1723e-60	2.34244e-59	-	GO:0005506//iron ion binding	-	gi|68484836|ref|XP_713639.1|/2.1431e-109/potential sterol binding protein [Candida albicans SC5314]
orf19.5220	858	160	53	20.0297	6.34116	-1.65933	Down	6.00468e-15	2.82188e-14	GO:0044464//cell part	GO:0005488//binding;GO:0004518//nuclease activity	-	gi|74679939|sp|Q5A3Q0.1|REXO4_CANAL/1.77036e-149/RecName: Full=RNA exonuclease 4
orf19.2688	2520	567	188	24.1671	7.65839	-1.65793	Down	5.53518e-49	3.81965e-48	-	-	-	gi|68470868|ref|XP_720441.1|/0/hypothetical protein CaO19.2688 [Candida albicans SC5314]
orf19.4746	1629	630	209	41.5396	13.1706	-1.65717	Down	3.35898e-54	2.41042e-53	GO:0031981//nuclear lumen	-	-	gi|68465084|ref|XP_723241.1|/0/hypothetical protein CaO19.12208 [Candida albicans SC5314]
orf19.494	1746	1108	369	68.1614	21.6951	-1.65158	Down	1.59e-93	1.36152e-92	GO:0044452	GO:0016866//intramolecular transferase activity;GO:0003723//RNA binding	-	gi|68477128|ref|XP_717357.1|/0/hypothetical protein CaO19.494 [Candida albicans SC5314]
orf19.4384	1689	384	128	24.4199	7.77966	-1.65028	Down	1.68951e-33	1.04763e-32	GO:0031224//intrinsic to membrane	GO:0022857//transmembrane transporter activity	GO:0006810//transport	gi|238879805|gb|EEQ43443.1|/0/hypothetical protein CAWG_01680 [Candida albicans WO-1]
orf19.6976	1842	368	123	21.4586	6.85481	-1.64637	Down	4.57016e-32	2.7914e-31	-	-	GO:0006810//transport	gi|68482745|ref|XP_714682.1|/0/potential membrane protein [Candida albicans SC5314]
orf19.4835	1584	783	262	53.0945	16.9796	-1.64476	Down	3.07106e-66	2.32959e-65	-	-	-	gi|68464887|ref|XP_723521.1|/0/hypothetical protein CaO19.4835 [Candida albicans SC5314]
orf19.773	588	170	57	31.0538	9.95125	-1.64182	Down	1.41274e-15	6.72178e-15	GO:0044424//intracellular part	-	-	gi|74585069|sp|Q59VF9.1|RSA3_CANAL/3.4157e-66/RecName: Full=Ribosome assembly protein 3
orf19.388	963	1576	529	175.781	56.391	-1.64025	Down	6.0031e-131	5.62067e-130	-	GO:0017111//nucleoside-triphosphatase activity;GO:0032559	GO:0009207	gi|68488443|ref|XP_711905.1|/0/potential CCR4-NOT complex associated factor Caf16p [Candida albicans SC5314]
orf19.3669	1788	69321	23339	4164.28	1339.97	-1.63587	Down	0	0	-	GO:0004672//protein kinase activity;GO:0032559	GO:0006464//protein modification process	gi|68484607|ref|XP_713763.1|/0/potential serine/threonine protein kinase [Candida albicans SC5314]
orf19.5959	2529	704	238	29.8997	9.66069	-1.62993	Down	5.53886e-59	4.07516e-58	-	-	GO:0042254//ribosome biogenesis	gi|68465617|ref|XP_723170.1|/0/potential small subunit rRNA processome component [Candida albicans SC5314]
orf19.3630	1287	627	212	52.3277	16.9098	-1.62972	Down	1.03328e-52	7.34593e-52	-	GO:0016740//transferase activity	-	gi|68483175|ref|XP_714521.1|/0/potential rRNA methyltransferase [Candida albicans SC5314]
orf19.3300	1530	1318	446	92.5266	29.9243	-1.62855	Down	1.02465e-108	9.10567e-108	-	GO:0046914//transition metal ion binding;GO:0008135//translation factor activity, nucleic acid binding	GO:0006412//translation	gi|68475013|ref|XP_718392.1|/0/likely ZPR1 zinc finger protein [Candida albicans SC5314]
orf19.7406	2061	1290	438	67.2287	21.8161	-1.62369	Down	5.38282e-106	4.76274e-105	-	-	-	gi|68479803|ref|XP_716071.1|/0/hypothetical protein CaO19.7406 [Candida albicans SC5314]
orf19.3665	1140	106	36	9.9872	3.24174	-1.62331	Down	4.26426e-10	1.02806e-09	-	-	-	gi|68484599|ref|XP_713759.1|/0/potential protein lysine methyltransferase [Candida albicans SC5314]
orf19.3478	546	88	30	17.3114	5.64038	-1.61786	Down	1.4214e-08	3.18916e-08	GO:0043231//intracellular membrane-bounded organelle	GO:0003676//nucleic acid binding	GO:0042254//ribosome biogenesis	gi|238883127|gb|EEQ46765.1|/4.72618e-101/60S ribosome subunit biogenesis protein NIP7 [Candida albicans WO-1]
orf19.5198	2226	616	210	29.7234	9.68443	-1.61786	Down	2.71666e-51	1.90916e-50	-	GO:0005488//binding	-	gi|68491575|ref|XP_710417.1|/0/hypothetical protein CaO19.12665 [Candida albicans SC5314]
orf19.1642	621	348	119	60.1908	19.6714	-1.61344	Down	1.38253e-29	8.23859e-29	-	-	-	gi|74587407|sp|Q5AJF1.1|LOC1_CANAL/1.72966e-66/RecName: Full=60S ribosomal subunit assembly/export protein LOC1
orf19.1981	489	528	182	115.976	38.207	-1.60192	Down	1.32807e-43	8.91308e-43	GO:0031224//intrinsic to membrane	GO:0070011	GO:0019538//protein metabolic process	gi|238882497|gb|EEQ46135.1|/2.50829e-91/mitochondrial inner membrane protease subunit 2 [Candida albicans WO-1]
orf19.7344	2508	568	196	24.3256	8.02248	-1.60036	Down	1.02799e-46	7.03823e-46	-	-	-	gi|68479088|ref|XP_716478.1|/0/possible class II histone deacetylase complex subunit Hda3p [Candida albicans SC5314]
orf19.4530.1	1101	33077	11415	3226.87	1064.31	-1.60022	Down	0	0	-	-	-	gi|238879323|gb|EEQ42961.1|/0/predicted protein [Candida albicans WO-1]
orf19.1802	1854	1488	514	86.2057	28.4599	-1.59885	Down	2.53744e-119	2.30177e-118	-	GO:0046914//transition metal ion binding;GO:0016705//oxidoreductase activity, acting on paired donors, with incorporation or reduction of molecular oxygen;GO:0019842//vitamin binding	GO:0008152//metabolic process	gi|68489465|ref|XP_711450.1|/0/possible Fe II, 2-oxoglutarate-dependent dioxygenase [Candida albicans SC5314]
orf19.4793	600	214	74	38.3094	12.6608	-1.59733	Down	1.53991e-18	7.81977e-18	-	-	-	gi|68464803|ref|XP_723479.1|/7.66875e-101/hypothetical protein CaO19.4793 [Candida albicans SC5314]
orf19.6621	3630	6848	2368	202.628	66.9661	-1.59733	Down	0	0	-	-	-	gi|238880027|gb|EEQ43665.1|/0/conserved hypothetical protein [Candida albicans WO-1]
orf19.7166	1344	208	72	16.6229	5.49937	-1.59583	Down	4.8747e-18	2.44696e-17	-	-	-	gi|68481694|ref|XP_715215.1|/0/hypothetical protein CaO19.7166 [Candida albicans SC5314]
orf19.3220	606	401	139	71.0746	23.5463	-1.59384	Down	2.79288e-33	1.72831e-32	-	-	-	gi|68490440|ref|XP_710970.1|/4.77985e-90/potential essential protein [Candida albicans SC5314]
orf19.7085	1320	27434	9528	2232.33	740.982	-1.59104	Down	0	0	-	-	-	gi|68471199|ref|XP_720376.1|/7.48881e-165/hypothetical protein CaO19.7085 [Candida albicans SC5314]
orf19.1886	1116	621	216	59.7682	19.8687	-1.58888	Down	2.11036e-50	1.47798e-49	-	-	GO:0010467//gene expression	gi|68485910|ref|XP_713143.1|/0/hypothetical protein CaO19.1886 [Candida albicans SC5314]
orf19.57	612	112	39	19.6566	6.54174	-1.58727	Down	2.68094e-10	6.51999e-10	GO:0043231//intracellular membrane-bounded organelle	-	GO:0006259//DNA metabolic process	gi|241948845|ref|XP_002417145.1|/1.98332e-99/DNA replication complex GINS protein PSF2, putative [Candida dubliniensis CD36]
orf19.7479	2724	2159	752	85.1311	28.3394	-1.58688	Down	2.12568e-170	2.08276e-169	GO:0044424//intracellular part	GO:0015927//trehalase activity;GO:0046872//metal ion binding;GO:0016462//pyrophosphatase activity	GO:0006793//phosphorus metabolic process;GO:0005991//trehalose metabolic process	gi|68474526|ref|XP_718636.1|/0/hypothetical protein CaO19.7479 [Candida albicans SC5314]
orf19.7199	507	178	62	37.7099	12.5535	-1.58686	Down	1.55862e-15	7.3986e-15	-	-	-	gi|68481758|ref|XP_715247.1|/6.83052e-82/hypothetical protein CaO19.7199 [Candida albicans SC5314]
orf19.669	1872	43	15	2.46721	0.822556	-1.58469	Down	0.000102051	0.000178015	-	-	-	gi|68484463|ref|XP_713842.1|/0/potential pheromone-regulated membrane protein Prm1 [Candida albicans SC5314]
orf19.7396	1206	189	66	16.8328	5.61794	-1.58317	Down	2.36282e-16	1.14927e-15	-	-	-	gi|68478737|ref|XP_716637.1|/3.2777e-148/hypothetical protein CaO19.7396 [Candida albicans SC5314]
orf19.4617	537	160	56	32.0028	10.7052	-1.57989	Down	4.98916e-14	2.20722e-13	-	GO:0016407//acetyltransferase activity	-	gi|68466121|ref|XP_722835.1|/8.49538e-100/potential peptide N-acetyl tranferase (GNAT family) [Candida albicans SC5314]
orf19.3007.2	666	1828	640	294.812	98.6474	-1.57944	Down	1.32939e-143	1.26406e-142	-	-	-	gi|238879208|gb|EEQ42846.1|/5.57243e-109/conserved hypothetical protein [Candida albicans WO-1]
orf19.5572	1299	1091	382	90.2108	30.188	-1.57932	Down	1.85174e-86	1.54034e-85	-	GO:0016740//transferase activity	-	gi|68473386|ref|XP_719251.1|/0/hypothetical protein CaO19.13018 [Candida albicans SC5314]
orf19.5917	1311	2179	763	178.524	59.7451	-1.57923	Down	9.13994e-171	8.98418e-170	-	GO:0005488//binding	-	gi|68465537|ref|XP_723130.1|/0/potential proteolytically activated transcription factor [Candida albicans SC5314]
orf19.674	1092	1068	374	105.049	35.1584	-1.57912	Down	1.16748e-84	9.60693e-84	-	GO:0046914//transition metal ion binding;GO:0003676//nucleic acid binding	GO:0009987//cellular process	gi|73918952|sp|Q59W50.1|CWC2_CANAL/0/RecName: Full=Pre-mRNA-splicing factor CWC2
orf19.1200	996	334	117	36.0189	12.0589	-1.57866	Down	1.26711e-27	7.35019e-27	-	-	-	gi|68487380|ref|XP_712461.1|/9.09492e-151/hypothetical protein CaO19.8791 [Candida albicans SC5314]
orf19.7374	3051	953	334	33.5501	11.2379	-1.57795	Down	1.16724e-75	9.14933e-75	GO:0043231//intracellular membrane-bounded organelle	GO:0046914//transition metal ion binding;GO:0003676//nucleic acid binding;GO:0001071//nucleic acid binding transcription factor activity	GO:0006351//transcription, DNA-dependent	gi|68478693|ref|XP_716615.1|/0/potential fungal zinc cluster transcription factor [Candida albicans SC5314]
orf19.268	1344	445	156	35.5634	11.9153	-1.57758	Down	3.11694e-36	1.99341e-35	-	-	-	gi|68471846|ref|XP_719966.1|/0/hypothetical protein CaO19.268 [Candida albicans SC5314]
orf19.4317	1116	2645	929	254.568	85.4538	-1.57484	Down	5.04218e-206	5.21622e-205	-	GO:0003824//catalytic activity	GO:0019321//pentose metabolic process	gi|68470494|ref|XP_720751.1|/0/hypothetical protein CaO19.11792 [Candida albicans SC5314]
orf19.6492	1227	575	202	50.3345	16.9	-1.57452	Down	3.33812e-46	2.28292e-45	-	GO:0004683//calmodulin-dependent protein kinase activity;GO:0032559	GO:0006464//protein modification process	gi|68469090|ref|XP_721332.1|/0/likely Ser/Thr protein kinase [Candida albicans SC5314]
orf19.1736	303	37	13	13.116	4.40434	-1.57433	Down	0.000341378	0.000571049	-	-	-	gi|68491916|ref|XP_710256.1|/3.14632e-43/hypothetical protein CaO19.1736 [Candida albicans SC5314]
orf19.3089	585	250	88	45.9015	15.4421	-1.57167	Down	6.09502e-21	3.232e-20	-	-	-	gi|68481108|ref|XP_715469.1|/1.35273e-107/hypothetical protein CaO19.10601 [Candida albicans SC5314]
orf19.1772	2955	392	138	14.2486	4.79404	-1.5715	Down	6.10412e-32	3.72461e-31	-	-	-	gi|68483351|ref|XP_714417.1|/0/hypothetical protein CaO19.1772 [Candida albicans SC5314]
orf19.2934	531	142	50	28.7235	9.6662	-1.57121	Down	1.60544e-12	4.98258e-12	GO:0043231//intracellular membrane-bounded organelle	GO:0046914//transition metal ion binding	-	gi|68468749|ref|XP_721433.1|/5.17063e-86/hypothetical protein CaO19.2934 [Candida albicans SC5314]
orf19.2897	843	71	25	9.04635	3.04434	-1.57121	Down	6.3232e-07	1.29255e-06	-	GO:0016491//oxidoreductase activity	GO:0008152//metabolic process	gi|85700435|sp|P87218.2|SOU2_CANAL/2.02631e-150/RecName: Full=Sorbose reductase homolog SOU2
orf19.2772	2142	1596	562	80.0306	26.9338	-1.57114	Down	1.12816e-124	1.03722e-123	-	GO:0016811//hydrolase activity, acting on carbon-nitrogen (but not peptide) bonds, in linear amides	-	gi|68471030|ref|XP_720522.1|/0/likely histone deacetylase Hos3p [Candida albicans SC5314]
orf19.2968	603	366	129	65.1938	21.961	-1.56979	Down	6.95466e-30	4.16055e-29	-	-	-	gi|68468817|ref|XP_721467.1|/1.42492e-78/hypothetical protein CaO19.2968 [Candida albicans SC5314]
orf19.2090	3792	940	332	26.6258	8.98773	-1.5668	Down	6.69194e-74	5.1988e-73	-	GO:0032559;GO:0042623//ATPase activity, coupled	-	gi|68472683|ref|XP_719660.1|/0/potential U3 snoRNP-associated helicase Ecm16 [Candida albicans SC5314]
orf19.1331	1419	2409	855	182.346	61.8534	-1.55976	Down	3.19098e-185	3.20882e-184	-	-	-	gi|74584478|sp|Q59PP0.1|HSM3_CANAL/0/RecName: Full=DNA mismatch repair protein HSM3
orf19.5812	1266	2633	935	223.388	75.8155	-1.55899	Down	4.10544e-202	4.2186e-201	-	-	-	gi|74585506|sp|Q5A0J9.1|ETT1_CANAL/0/RecName: Full=Enhancer of translation termination 1
orf19.6054	2169	1298	461	64.2773	21.8183	-1.55877	Down	1.33643e-100	1.16395e-99	-	GO:0003824//catalytic activity	-	gi|68473826|ref|XP_719016.1|/0/hypothetical protein CaO19.6054 [Candida albicans SC5314]
orf19.2893	2538	318	113	13.4579	4.57053	-1.55802	Down	6.63732e-26	3.7855e-25	GO:0044464//cell part	-	GO:0010467//gene expression;GO:0009987//cellular process	gi|68480904|ref|XP_715605.1|/0/hypothetical protein CaO19.10411 [Candida albicans SC5314]
orf19.4774	1140	1195	426	112.592	38.3606	-1.5534	Down	2.62848e-92	2.24136e-91	GO:0031967;GO:0043231//intracellular membrane-bounded organelle;GO:0031224//intrinsic to membrane	GO:0043169//cation binding;GO:0003824//catalytic activity	GO:0032501//multicellular organismal process;GO:0006091//generation of precursor metabolites and energy	gi|68464765|ref|XP_723460.1|/0/constitutive alternative oxidase [Candida albicans SC5314]
orf19.2397	1506	185	66	13.1944	4.49882	-1.55231	Down	1.25969e-15	6.00293e-15	GO:0044464//cell part	-	GO:0006810//transport	gi|68485597|ref|XP_713281.1|/0/hypothetical protein CaO19.9933 [Candida albicans SC5314]
orf19.1789	1464	98	35	7.18998	2.45418	-1.55074	Down	6.41338e-09	1.4708e-08	-	-	-	gi|68489406|ref|XP_711454.1|/0/hypothetical protein CaO19.9355 [Candida albicans SC5314]
orf19.3455	1362	456	163	35.9609	12.2854	-1.54948	Down	3.61418e-36	2.309e-35	GO:0044464//cell part	-	-	gi|74584749|sp|Q59S85.1|LPE10_CANAL/0/RecName: Full=Mitochondrial inner membrane magnesium transporter LPE10; Flags: Precursor
orf19.610	1578	5829	2092	396.762	136.093	-1.54368	Down	0	0	-	GO:0003676//nucleic acid binding;GO:0001071//nucleic acid binding transcription factor activity	GO:0006351//transcription, DNA-dependent	gi|1169477|sp|P43064.1|EFG1_CANAL/2.1351e-116/RecName: Full=Enhanced filamentous growth protein
orf19.603	852	673	242	84.8434	29.1579	-1.54092	Down	3.64464e-52	2.57909e-51	GO:0032991//macromolecular complex;GO:0031981//nuclear lumen	GO:0016876//ligase activity, forming aminoacyl-tRNA and related compounds;GO:0032559	GO:0042254//ribosome biogenesis;GO:0010467//gene expression	gi|68483743|ref|XP_714230.1|/4.59031e-158/likely U3 snoRNP ribosomal biogenesis factor IMP4p [Candida albicans SC5314]
orf19.2185	1221	419	151	36.8588	12.6953	-1.53772	Down	5.16224e-33	3.18486e-32	GO:0005634//nucleus	-	GO:0042254//ribosome biogenesis	gi|74585725|sp|Q5A2T0.1|NSA1_CANAL/0/RecName: Full=Ribosome biogenesis protein NSA1
orf19.5859	1581	152	55	10.3265	3.57117	-1.53189	Down	7.15992e-13	2.39999e-12	-	-	GO:0006810//transport	gi|68465427|ref|XP_723075.1|/0/potential allantoate permease [Candida albicans SC5314]
orf19.4581	1197	196	71	17.5875	6.08898	-1.53028	Down	3.70672e-16	1.78589e-15	GO:0031090//organelle membrane;GO:0031224//intrinsic to membrane	GO:0016757//transferase activity, transferring glycosyl groups	GO:0006497//protein lipidation	gi|74587768|sp|Q5AMR5.1|GPI14_CANAL/0/RecName: Full=GPI mannosyltransferase 1; AltName: Full=GPI mannosyltransferase I; Short=GPI-MT-I; AltName: Full=Glycosylphosphatidylinositol-anchor biosynthesis protein 14
orf19.4012	915	1994	724	234.071	81.2265	-1.52692	Down	5.5842e-149	5.35138e-148	-	-	-	gi|68467845|ref|XP_722081.1|/2.85314e-124/hypothetical protein CaO19.11495 [Candida albicans SC5314]
orf19.2832	1980	3062	1113	166.105	57.7046	-1.52534	Down	2.35712e-227	2.5107e-226	-	-	-	gi|68480536|ref|XP_715763.1|/0/hypothetical protein CaO19.2832 [Candida albicans SC5314]
orf19.76	2538	510	186	21.5835	7.52318	-1.52051	Down	3.37922e-39	2.20027e-38	GO:0043231//intracellular membrane-bounded organelle	GO:0008168//methyltransferase activity	GO:0006730//one-carbon metabolic process;GO:0006364//rRNA processing	gi|68491995|ref|XP_710224.1|/0/potential rRNA methyltransferase [Candida albicans SC5314]
orf19.4634	1188	175	64	15.8221	5.53024	-1.51653	Down	2.07584e-14	9.44322e-14	GO:0044444//cytoplasmic part	GO:0003723//RNA binding;GO:0003824//catalytic activity;GO:0032559	GO:0002097	gi|74587732|sp|Q5AML2.1|CTU1_CANAL/0/RecName: Full=Cytoplasmic tRNA 2-thiolation protein 1; AltName: Full=Cytoplasmic tRNA adenylyltransferase 1
orf19.6530	864	503	184	62.5312	21.8617	-1.51617	Down	1.58506e-38	1.02877e-37	-	GO:0005515//protein binding	GO:0044267//cellular protein metabolic process	gi|238883350|gb|EEQ46988.1|/2.86153e-147/conserved hypothetical protein [Candida albicans WO-1]
orf19.2870	432	194	71	48.2348	16.8715	-1.51548	Down	8.4189e-16	4.03079e-15	-	-	-	gi|68480971|ref|XP_715527.1|/1.01752e-78/hypothetical LDG family protein 11 [Candida albicans SC5314]
orf19.3393	1725	604	222	37.6089	13.2113	-1.50931	Down	1.25407e-45	8.52876e-45	GO:0031981//nuclear lumen	GO:0003676//nucleic acid binding;GO:0042623//ATPase activity, coupled;GO:0032559	GO:0042254//ribosome biogenesis	gi|74679968|sp|Q5A4P9.1|DBP9_CANAL/0/RecName: Full=ATP-dependent RNA helicase DBP9
orf19.1887	1704	737	271	46.4559	16.326	-1.50869	Down	2.90494e-55	2.10187e-54	-	GO:0003824//catalytic activity	GO:0044238//primary metabolic process	gi|68485819|ref|XP_713190.1|/0/hypothetical protein CaO19.9443 [Candida albicans SC5314]
orf19.3624	3441	448	165	13.9842	4.92243	-1.50635	Down	3.51842e-34	2.19731e-33	-	GO:0003676//nucleic acid binding;GO:0008408//3'-5' exonuclease activity	-	gi|68483262|ref|XP_714466.1|/0/hypothetical protein CaO19.3624 [Candida albicans SC5314]
orf19.2176	810	141	52	18.6972	6.5902	-1.50443	Down	9.1942e-12	2.46118e-11	-	GO:0008875;GO:0000166//nucleotide binding	GO:0008152//metabolic process	gi|68479935|ref|XP_716017.1|/6.31807e-154/potential D-isomer specific 2-hydroxyacid dehydrogenase [Candida albicans SC5314]
orf19.6956	1578	103	38	7.01089	2.47205	-1.50389	Down	5.88454e-09	1.35205e-08	-	-	GO:0006810//transport	gi|68486806|ref|XP_712757.1|/0/hypothetical protein CaO19.6956 [Candida albicans SC5314]
orf19.6349	1008	457	169	48.6966	17.211	-1.50049	Down	1.2133e-34	7.63183e-34	GO:0044424//intracellular part	-	-	gi|68489185|ref|XP_711567.1|/2.51926e-156/hypothetical protein CaO19.6349 [Candida albicans SC5314]
orf19.2846	414	419	155	108.707	38.4336	-1.5	Down	6.97138e-32	4.24955e-31	-	-	-	gi|68480460|ref|XP_715828.1|/7.70307e-63/hypothetical protein CaO19.10365 [Candida albicans SC5314]
orf19.449	1197	5462	2023	490.118	173.493	-1.49825	Down	0	0	-	GO:0003824//catalytic activity	-	gi|68480364|ref|XP_715883.1|/0/hypothetical protein CaO19.449 [Candida albicans SC5314]
orf19.1039	1107	143	53	13.8749	4.91483	-1.49727	Down	7.76684e-12	2.09931e-11	-	GO:0004661//protein geranylgeranyltransferase activity	GO:0006497//protein lipidation	gi|238879127|gb|EEQ42765.1|/0/conserved hypothetical protein [Candida albicans WO-1]
orf19.3369	792	388	144	52.6198	18.6645	-1.49531	Down	1.63201e-29	9.71576e-29	-	-	-	gi|68489136|ref|XP_711589.1|/2.48262e-123/hypothetical protein CaO19.3369 [Candida albicans SC5314]
orf19.7341.1	294	1477	550	539.605	192.042	-1.49048	Down	5.10858e-107	4.52665e-106	-	-	-	-
orf19.3713	591	67	25	12.1767	4.34243	-1.48755	Down	3.38028e-06	6.60289e-06	-	-	-	gi|68490235|ref|XP_711066.1|/1.27372e-60/hypothetical protein CaO19.11198 [Candida albicans SC5314]
orf19.2504	3633	1109	415	32.7875	11.7263	-1.48339	Down	2.93742e-80	2.36931e-79	GO:0043231//intracellular membrane-bounded organelle	GO:0017111//nucleoside-triphosphatase activity;GO:0032559	GO:0022613//ribonucleoprotein complex biogenesis	gi|68474795|ref|XP_718605.1|/0/hypothetical protein CaO19.10040 [Candida albicans SC5314]
orf19.95	891	181	68	21.8194	7.8345	-1.4777	Down	2.3842e-14	1.07978e-13	-	-	-	gi|68483487|ref|XP_714304.1|/1.55799e-127/possible membrane protein [Candida albicans SC5314]
orf19.4191	630	125	47	21.3114	7.65839	-1.47651	Down	2.46868e-10	6.01335e-10	GO:0030529//ribonucleoprotein complex	GO:0005198//structural molecule activity	GO:0010467//gene expression	gi|68486735|ref|XP_712796.1|/6.35173e-72/potential L24-like nucleolar rRNA maturation factor [Candida albicans SC5314]
orf19.2800	96	61	23	68.2498	24.5944	-1.47249	Down	1.09602e-05	2.06187e-05	-	-	-	gi|238878818|gb|EEQ42456.1|/5.84157e-10/predicted protein [Candida albicans WO-1]
orf19.6686	2253	578	218	27.5556	9.93288	-1.47206	Down	3.33836e-42	2.20895e-41	GO:0043231//intracellular membrane-bounded organelle	-	-	gi|68487961|ref|XP_712139.1|/0/hypothetical protein CaO19.6686 [Candida albicans SC5314]
orf19.6316.4	267	177	67	71.2041	25.7599	-1.46683	Down	6.31478e-14	2.74599e-13	-	-	-	gi|238879932|gb|EEQ43570.1|/3.15241e-19/predicted protein [Candida albicans WO-1]
orf19.4477	1014	10658	4048	1128.97	409.81	-1.46197	Down	0	0	-	GO:0003824//catalytic activity	GO:0008152//metabolic process	gi|68488365|ref|XP_711971.1|/0/hypothetical protein CaO19.4477 [Candida albicans SC5314]
orf19.891	2337	5906	2246	271.442	98.6577	-1.46014	Down	0	0	-	GO:0016814//hydrolase activity, acting on carbon-nitrogen (but not peptide) bonds, in cyclic amidines	GO:0009112;GO:0009127//purine nucleoside monophosphate biosynthetic process	gi|68469763|ref|XP_721133.1|/0/adenosine/AMP deaminase [Candida albicans SC5314]
orf19.7313	1446	126	48	9.35934	3.40763	-1.45764	Down	3.10322e-10	7.52005e-10	GO:0031224//intrinsic to membrane	-	GO:0006810//transport	gi|68479026|ref|XP_716447.1|/0/potential MFS transporter [Candida albicans SC5314]
orf19.4479	2163	391	149	19.4161	7.07147	-1.45717	Down	1.14701e-28	6.76263e-28	-	GO:0003676//nucleic acid binding	-	gi|332319729|sp|C4YEN2.1|NOP9_CANAW/0/RecName: Full=Nucleolar protein 9; AltName: Full=Pumilio domain-containing protein NOP9
orf19.2973	2040	2103	805	110.727	40.5085	-1.45071	Down	1.26579e-145	1.20734e-144	-	-	-	gi|74680292|sp|Q5AI80.1|VTS1_CANAL/0/RecName: Full=Protein VTS1
orf19.3609	1272	680	261	57.4202	21.0636	-1.4468	Down	3.94694e-48	2.71446e-47	GO:0031981//nuclear lumen	-	GO:0042254//ribosome biogenesis	gi|68483135|ref|XP_714502.1|/0/hypothetical protein CaO19.11092 [Candida albicans SC5314]
orf19.349	2106	1000	384	51.0017	18.7177	-1.44614	Down	6.62812e-70	5.07824e-69	-	-	-	gi|68471741|ref|XP_720177.1|/0/hypothetical protein CaO19.7982 [Candida albicans SC5314]
orf19.320	1002	221	85	23.6901	8.70826	-1.44383	Down	1.16123e-16	5.68889e-16	-	GO:0003824//catalytic activity	GO:0008152//metabolic process	gi|68471681|ref|XP_720147.1|/0/hypothetical protein CaO19.7952 [Candida albicans SC5314]
orf19.1804	1089	350	135	34.521	12.7258	-1.43971	Down	2.15336e-25	1.21008e-24	GO:0016020//membrane	-	-	gi|238879950|gb|EEQ43588.1|/6.9714e-147/conserved hypothetical protein [Candida albicans WO-1]
orf19.3908	615	70	27	12.2255	4.5068	-1.43971	Down	3.5554e-06	6.93388e-06	-	-	-	gi|68467639|ref|XP_721978.1|/3.1819e-121/hypothetical protein CaO19.11389 [Candida albicans SC5314]
orf19.1280	330	1609	621	523.703	193.178	-1.43882	Down	1.61818e-110	1.44011e-109	-	GO:0008135//translation factor activity, nucleic acid binding	GO:0006412//translation	gi|68491052|ref|XP_710661.1|/1.52054e-50/likely translation initiation factor eIF3 subunit Sui1 [Candida albicans SC5314]
orf19.6366	759	44	17	6.22664	2.29926	-1.43729	Down	0.000253726	0.000427586	-	GO:0003676//nucleic acid binding	-	gi|68479351|ref|XP_716207.1|/4.63783e-140/hypothetical protein CaO19.6366 [Candida albicans SC5314]
orf19.7369	1260	339	131	28.8983	10.6729	-1.43704	Down	1.40009e-24	7.80326e-24	-	GO:0016741	GO:0006730//one-carbon metabolic process	gi|68478683|ref|XP_716610.1|/0/hypothetical protein CaO19.7369 [Candida albicans SC5314]
orf19.698	1485	3222	1247	233.046	86.2025	-1.43481	Down	2.01022e-218	2.11177e-217	-	-	-	gi|68488727|ref|XP_711789.1|/0/hypothetical protein CaO19.8317 [Candida albicans SC5314]
orf19.7635	1842	1867	724	108.867	40.3487	-1.43198	Down	4.98466e-127	4.61761e-126	GO:0005634//nucleus	GO:0003676//nucleic acid binding;GO:0042623//ATPase activity, coupled;GO:0032559	-	gi|74656492|sp|Q5ACK7.1|DRS1_CANAL/0/RecName: Full=ATP-dependent RNA helicase DRS1
orf19.6077	1557	8611	3347	594.029	220.672	-1.42863	Down	0	0	GO:0031224//intrinsic to membrane	-	-	gi|74586598|sp|Q5AB93.1|PNS1_CANAL/0/RecName: Full=Protein PNS1
orf19.3304	813	257	100	33.9536	12.6267	-1.42709	Down	7.96108e-19	4.06634e-18	-	GO:0004518//nuclease activity	-	gi|68475021|ref|XP_718396.1|/4.12331e-153/likely exosome component Rrp40p [Candida albicans SC5314]
orf19.6882	1512	20737	8070	1473.12	547.901	-1.42688	Down	0	0	-	GO:0016628//oxidoreductase activity, acting on the CH-CH group of donors, NAD or NADP as acceptor	GO:0008152//metabolic process	gi|68486579|ref|XP_712840.1|/0/potential fumarate reductase [Candida albicans SC5314]
orf19.6550	885	59	23	7.16064	2.66787	-1.4244	Down	2.47054e-05	4.52242e-05	-	-	-	gi|68469198|ref|XP_721386.1|/6.60249e-171/hypothetical protein CaO19.6550 [Candida albicans SC5314]
orf19.1816	3468	1903	743	58.939	21.9933	-1.42216	Down	4.0199e-128	3.74089e-127	-	-	-	gi|29373983|gb|AAO72959.1|/0/agglutinin-like sequence 3 [Candida albicans]
orf19.5227	498	220	86	47.45	17.7276	-1.42041	Down	3.16532e-16	1.52986e-15	-	-	-	gi|68479234|ref|XP_716296.1|/2.71048e-72/hypothetical protein CaO19.5227 [Candida albicans SC5314]
orf19.254	1269	1867	731	158.025	59.1338	-1.4181	Down	3.3586e-125	3.09254e-124	-	-	-	gi|68471820|ref|XP_719953.1|/0/hypothetical protein CaO19.254 [Candida albicans SC5314]
orf19.1753	2280	515	202	24.2614	9.09487	-1.41554	Down	1.0126e-35	6.43559e-35	-	GO:0003676//nucleic acid binding;GO:0016866//intramolecular transferase activity	GO:0009451//RNA modification	gi|68483406|ref|XP_714359.1|/0/potential U2 snRNA pseudouridine synthase [Candida albicans SC5314]
orf19.3972	423	79	31	20.0599	7.52318	-1.4149	Down	1.15092e-06	2.31547e-06	-	-	-	gi|241956039|ref|XP_002420740.1|/1.65431e-44/Golgi transport protein, putative; Got1-like family Golgi transport protein, putative [Candida dubliniensis CD36]
orf19.3922	864	931	366	115.739	43.4858	-1.41226	Down	5.62894e-63	4.2124e-62	-	GO:0016787//hydrolase activity	-	gi|68467667|ref|XP_721992.1|/1.36917e-157/potential pyrimidine 5' nucleotidase [Candida albicans SC5314]
orf19.6091	1869	2314	910	132.983	49.9818	-1.41177	Down	1.12227e-153	1.08226e-152	-	-	-	gi|68473896|ref|XP_719051.1|/0/positive regulator of alkaline-induced genes [Candida albicans SC5314]
orf19.5742	5673	2117	834	40.0821	15.0915	-1.40922	Down	2.21516e-140	2.09977e-139	-	-	-	gi|30841440|gb|AAP34371.1|/0/agglutinin-like sequence 9 [Candida albicans]
orf19.7227	375	1289	508	369.202	139.063	-1.40867	Down	3.61174e-86	2.98812e-85	-	-	-	gi|68482021|ref|XP_715028.1|/1.51471e-42/potential PP1 phosphatase inhibitor [Candida albicans SC5314]
orf19.1333	1830	1312	518	77.0062	29.0575	-1.40606	Down	1.96882e-87	1.6467e-86	-	-	-	gi|68488960|ref|XP_711673.1|/0/hypothetical protein CaO19.1333 [Candida albicans SC5314]
orf19.1564	570	7553	2986	1423.27	537.768	-1.40415	Down	0	0	GO:0043231//intracellular membrane-bounded organelle;GO:0031224//intrinsic to membrane	-	GO:0015031//protein transport	gi|238882040|gb|EEQ45678.1|/3.76344e-83/conserved hypothetical protein [Candida albicans WO-1]
orf19.5232	879	139	55	16.9851	6.42324	-1.4029	Down	1.32618e-10	3.26682e-10	-	GO:0016876//ligase activity, forming aminoacyl-tRNA and related compounds;GO:0032559	GO:0010467//gene expression	gi|68479244|ref|XP_716301.1|/6.58563e-139/likely nucleolar ribosomal biogenesis factor BRX1p [Candida albicans SC5314]
orf19.1314	1410	768	304	58.5039	22.1327	-1.40235	Down	1.00959e-51	7.11133e-51	-	GO:0046914//transition metal ion binding	-	gi|68486213|ref|XP_709955.1|/0/hypothetical protein CaO19.1314 [Candida albicans SC5314]
orf19.3043	1056	505	200	51.3654	19.4422	-1.4016	Down	1.45819e-34	9.15339e-34	GO:0005789//endoplasmic reticulum membrane	GO:0004091//carboxylesterase activity	GO:0046488//phosphatidylinositol metabolic process;GO:0015031//protein transport	gi|68468965|ref|XP_721541.1|/0/hypothetical protein CaO19.3043 [Candida albicans SC5314]
orf19.2762	531	5345	2119	1081.18	409.653	-1.40012	Down	0	0	-	GO:0003824//catalytic activity	GO:0019725//cellular homeostasis	gi|68471010|ref|XP_720512.1|/3.23118e-96/potential alkyl hydroperoxide reductase [Candida albicans SC5314]
orf19.5338	786	8704	3451	1189.43	450.716	-1.39998	Down	0	0	GO:0043231//intracellular membrane-bounded organelle	GO:0046914//transition metal ion binding;GO:0003676//nucleic acid binding;GO:0001071//nucleic acid binding transcription factor activity;GO:0004518//nuclease activity	GO:0006259//DNA metabolic process;GO:0006351//transcription, DNA-dependent	gi|68477657|ref|XP_717141.1|/7.90881e-106/potential fungal zinc cluster transcription factor [Candida albicans SC5314]
orf19.4773	1098	184	73	17.9994	6.82497	-1.39906	Down	1.5714e-13	6.30415e-13	GO:0031967;GO:0043231//intracellular membrane-bounded organelle;GO:0031224//intrinsic to membrane	GO:0043169//cation binding;GO:0003824//catalytic activity	GO:0032501//multicellular organismal process;GO:0006091//generation of precursor metabolites and energy	gi|238878671|gb|EEQ42309.1|/0/conserved hypothetical protein [Candida albicans WO-1]
orf19.53	1134	229	91	21.6903	8.23775	-1.39673	Down	1.91532e-16	9.33833e-16	-	GO:0046872//metal ion binding;GO:0003676//nucleic acid binding	-	gi|68490634|ref|XP_710864.1|/0/potential spliceosomal U2AF small subunit [Candida albicans SC5314]
orf19.4960	1035	697	277	72.3328	27.4738	-1.39659	Down	8.10658e-47	5.5627e-46	-	GO:0016765//transferase activity, transferring alkyl or aryl (other than methyl) groups	GO:0006596//polyamine biosynthetic process	gi|238878290|gb|EEQ41928.1|/0/spermine synthase [Candida albicans WO-1]
orf19.2079	345	339	135	105.542	40.1693	-1.39364	Down	1.54162e-23	8.47613e-23	-	GO:0016836//hydro-lyase activity	GO:0009108//coenzyme biosynthetic process	gi|68472663|ref|XP_719650.1|/1.14719e-61/hypothetical protein CaO19.9626 [Candida albicans SC5314]
orf19.1035	2844	1614	643	60.956	23.2093	-1.39307	Down	1.18935e-105	1.05082e-104	GO:0043231//intracellular membrane-bounded organelle	GO:0046914//transition metal ion binding;GO:0001071//nucleic acid binding transcription factor activity	GO:0006351//transcription, DNA-dependent	gi|68484838|ref|XP_713640.1|/0/potential fungal zinc cluster transcription factor [Candida albicans SC5314]
orf19.4372	1719	1563	627	97.6621	37.4431	-1.3831	Down	2.8032e-101	2.4519e-100	GO:0016020//membrane	-	-	gi|68481813|ref|XP_715148.1|/0/hypothetical protein CaO19.4372 [Candida albicans SC5314]
orf19.29	972	172	69	19.0066	7.28724	-1.38306	Down	1.51609e-12	4.72446e-12	-	-	-	gi|68488655|ref|XP_711836.1|/2.91986e-162/hypothetical protein CaO19.29 [Candida albicans SC5314]
orf19.6266	2616	408	164	16.7519	6.43556	-1.38019	Down	1.27663e-27	7.39842e-27	-	-	-	gi|68474288|ref|XP_718853.1|/0/hypothetical protein CaO19.6266 [Candida albicans SC5314]
orf19.4436	516	186	75	38.7174	14.9208	-1.37566	Down	2.3633e-13	9.01386e-13	-	GO:0004601//peroxidase activity	GO:0008152//metabolic process;GO:0006950//response to stress	gi|68483982|ref|XP_714081.1|/5.15353e-96/potential phospholipid hydroperoxide glutathione peroxidase [Candida albicans SC5314]
orf19.5912	3201	1940	783	65.0967	25.1105	-1.37429	Down	4.75632e-124	4.35984e-123	-	-	-	gi|68465527|ref|XP_723125.1|/0/potential pre-rRNA nuclear export protein [Candida albicans SC5314]
orf19.5436	2091	1175	475	60.3569	23.3195	-1.37198	Down	1.10722e-75	8.69001e-75	-	-	-	gi|68476317|ref|XP_717808.1|/0/potential U3 snoRNP protein Utp8 [Candida albicans SC5314]
orf19.1902	1689	643	260	40.8907	15.8024	-1.37163	Down	3.40476e-42	2.25045e-41	-	-	-	gi|68485849|ref|XP_713205.1|/0/hypothetical protein CaO19.9458 [Candida albicans SC5314]
orf19.5134	1158	267	108	24.7654	9.57404	-1.37113	Down	1.92796e-18	9.76597e-18	-	-	-	gi|68477907|ref|XP_716957.1|/0/hypothetical protein CaO19.5134 [Candida albicans SC5314]
orf19.7011	3654	1408	570	41.3882	16.0135	-1.36993	Down	4.02034e-90	3.41869e-89	-	-	-	gi|68471057|ref|XP_720305.1|/0/hypothetical protein CaO19.7011 [Candida albicans SC5314]
orf19.718	2076	116	47	6.00169	2.32408	-1.36871	Down	8.60208e-09	1.95441e-08	-	GO:0005488//binding	-	gi|68486012|ref|XP_713078.1|/0/potential RNA Pol I transcription factor subunit Rrn11 [Candida albicans SC5314]
orf19.4029	1248	992	402	85.3768	33.0668	-1.36846	Down	6.22718e-64	4.70037e-63	-	-	-	gi|68467879|ref|XP_722098.1|/0/potential ribosomal large subunit biogenesis factor [Candida albicans SC5314]
orf19.4792	1674	1912	775	122.68	47.5255	-1.36813	Down	1.83575e-121	1.67269e-120	-	-	-	gi|68464801|ref|XP_723478.1|/0/hypothetical protein CaO19.4792 [Candida albicans SC5314]
orf19.2173	1143	2509	1017	235.775	91.3387	-1.36811	Down	8.98708e-159	8.70793e-158	GO:0043231//intracellular membrane-bounded organelle	-	GO:0006359//regulation of transcription from RNA polymerase III promoter	gi|238883697|gb|EEQ47335.1|/8.52771e-167/conserved hypothetical protein [Candida albicans WO-1]
orf19.2945	1695	313	127	19.8343	7.69155	-1.36665	Down	2.94902e-21	1.57333e-20	GO:0031224//intrinsic to membrane	GO:0005275//amine transmembrane transporter activity	GO:0006865//amino acid transport	gi|68468771|ref|XP_721444.1|/0/potential proline/neutral amino acid permease [Candida albicans SC5314]
orf19.2531	966	18652	7576	2073.92	805.087	-1.36514	Down	0	0	-	-	-	gi|68475160|ref|XP_718298.1|/1.09325e-177/cell surface protein [Candida albicans SC5314]
orf19.706	1563	1046	425	71.8812	27.9132	-1.36467	Down	4.89546e-67	3.72274e-66	-	-	-	gi|68488743|ref|XP_711797.1|/0/likely 60s ribosomal subunit nuclear export factor NMD3 [Candida albicans SC5314]
orf19.1027	1110	851	346	82.3473	31.9988	-1.36371	Down	8.18676e-55	5.90258e-54	-	-	-	gi|68484822|ref|XP_713632.1|/0/hypothetical protein CaO19.1027 [Candida albicans SC5314]
orf19.5136	687	450	183	70.3556	27.3448	-1.3634	Down	9.11392e-30	5.44697e-29	-	GO:0000166//nucleotide binding	-	gi|68477911|ref|XP_716959.1|/2.85292e-119/hypothetical protein CaO19.5136 [Candida albicans SC5314]
orf19.2362	846	113	46	14.3467	5.58171	-1.36194	Down	1.52012e-08	3.39694e-08	-	-	-	gi|74584801|sp|Q59SN0.1|RRP36_CANAL/9.56121e-116/RecName: Full=rRNA biogenesis protein RRP36; AltName: Full=Ribosomal RNA-processing protein 36
orf19.6589	1347	704	287	56.1368	21.8723	-1.35984	Down	1.87196e-45	1.27168e-44	-	-	-	gi|238880343|gb|EEQ43981.1|/9.38208e-155/conserved hypothetical protein [Candida albicans WO-1]
orf19.7502	777	2560	1045	353.885	138.062	-1.35796	Down	3.82406e-160	3.71116e-159	-	-	-	gi|68474572|ref|XP_718659.1|/4.3527e-133/hypothetical protein CaO19.7502 [Candida albicans SC5314]
orf19.5596	1134	66	27	6.25135	2.44417	-1.35482	Down	1.7289e-05	3.20804e-05	-	-	-	gi|74680130|sp|Q5ABV4.1|ASA1_CANAL/0/RecName: Full=ASTRA-associated protein 1
orf19.8278	342	44	18	13.8188	5.40289	-1.35482	Down	0.000467838	0.000771611	-	-	-	gi|238878459|gb|EEQ42097.1|/1.37792e-14/predicted protein [Candida albicans WO-1]
orf19.6234	1605	545	223	36.4724	14.263	-1.35453	Down	2.2925e-35	1.45247e-34	-	-	GO:0042254//ribosome biogenesis	gi|68474228|ref|XP_718823.1|/0/hypothetical protein CaO19.6234 [Candida albicans SC5314]
orf19.6365	1119	939	385	90.1319	35.3192	-1.35158	Down	1.67224e-59	1.2333e-58	-	GO:0004721//phosphoprotein phosphatase activity	GO:0006796//phosphate-containing compound metabolic process;GO:0006464//protein modification process	gi|68479349|ref|XP_716206.1|/0/hypothetical protein CaO19.6365 [Candida albicans SC5314]
orf19.7299.1	300	95	39	34.013	13.3451	-1.34977	Down	2.6032e-07	5.42651e-07	-	-	-	gi|238880285|gb|EEQ43923.1|/9.80668e-45/predicted protein [Candida albicans WO-1]
orf19.4887	2190	5233	2150	256.655	100.78	-1.34862	Down	0	0	-	-	-	gi|68464985|ref|XP_723570.1|/0/hypothetical protein CaO19.4887 [Candida albicans SC5314]
orf19.5623	1410	1483	610	112.97	44.411	-1.34696	Down	1.92186e-92	1.64109e-91	-	GO:0032559	GO:0009987//cellular process	gi|84027760|sp|Q5AC48.2|ARP4_CANAL/0/RecName: Full=Actin-related protein 4; AltName: Full=Actin-like protein ARP4; Short=Actin-like protein 4
orf19.4982	1629	509	210	33.5614	13.2336	-1.34259	Down	1.02897e-32	6.32912e-32	-	GO:0003824//catalytic activity	GO:0044238//primary metabolic process	gi|68467281|ref|XP_722302.1|/0/hypothetical protein CaO19.12449 [Candida albicans SC5314]
orf19.3867	888	571	236	69.0663	27.2822	-1.34002	Down	2.1461e-36	1.37684e-35	GO:0043229//intracellular organelle;GO:0030529//ribonucleoprotein complex	GO:0005198//structural molecule activity	GO:0010467//gene expression	gi|68485087|ref|XP_713533.1|/1.18323e-135/potential L7-like nucleolar rRNA maturation factor [Candida albicans SC5314]
orf19.2942	1761	1199	496	73.1312	28.9136	-1.33874	Down	2.08796e-74	1.63037e-73	GO:0031224//intrinsic to membrane	GO:0005275//amine transmembrane transporter activity	GO:0006865//amino acid transport	gi|238879265|gb|EEQ42903.1|/0/conserved hypothetical protein [Candida albicans WO-1]
orf19.5782	2256	2260	936	107.6	42.5909	-1.33706	Down	2.56482e-138	2.41623e-137	-	GO:0043169//cation binding;GO:0003824//catalytic activity	-	gi|68481368|ref|XP_715323.1|/0/hypothetical protein CaO19.5782 [Candida albicans SC5314]
orf19.3041	1950	1228	509	67.6405	26.7956	-1.33589	Down	6.42152e-76	5.04642e-75	-	-	-	gi|68468961|ref|XP_721539.1|/0/hypothetical protein CaO19.3041 [Candida albicans SC5314]
orf19.2314	408	82	34	21.5872	8.55458	-1.33541	Down	2.11002e-06	4.17768e-06	GO:0005634//nucleus	-	GO:0042254//ribosome biogenesis	gi|74585197|sp|Q59WI7.1|CGR1_CANAL/2.18865e-49/RecName: Full=rRNA-processing protein CGR1
orf19.550	810	2835	1179	375.933	149.42	-1.3311	Down	7.87658e-172	7.75482e-171	-	GO:0016641//oxidoreductase activity, acting on the CH-NH2 group of donors, oxygen as acceptor;GO:0000166//nucleotide binding	GO:0008614//pyridoxine metabolic process	gi|68477240|ref|XP_717413.1|/3.03007e-156/hypothetical protein CaO19.550 [Candida albicans SC5314]
orf19.5732	1602	444	185	29.7689	11.8547	-1.32835	Down	2.65414e-28	1.55733e-27	GO:0031981//nuclear lumen	GO:0032561//guanyl ribonucleotide binding	GO:0022613//ribonucleoprotein complex biogenesis	gi|238883008|gb|EEQ46646.1|/0/nucleolar GTP-binding protein 2 [Candida albicans WO-1]
orf19.1646	2526	644	269	27.3839	10.932	-1.32477	Down	3.78222e-40	2.47057e-39	-	GO:0005488//binding	-	gi|74680318|sp|Q5AJS6.1|MRD1_CANAL/0/RecName: Full=Multiple RNA-binding domain-containing protein 1
orf19.5953	1338	4399	1844	353.135	141.477	-1.31966	Down	5.33908e-262	5.88165e-261	GO:0044464//cell part	GO:0046914//transition metal ion binding	-	gi|68465605|ref|XP_723164.1|/0/potential zinc finger protein [Candida albicans SC5314]
orf19.113	900	93	39	11.099	4.44838	-1.31907	Down	5.56354e-07	1.13917e-06	-	-	-	gi|68483519|ref|XP_714320.1|/2.04642e-167/possible oxidoreductase [Candida albicans SC5314]
orf19.5010	981	150	63	16.4235	6.59252	-1.31686	Down	2.0307e-10	4.96827e-10	-	GO:0008649//rRNA methyltransferase activity;GO:0003676//nucleic acid binding;GO:0008170//N-methyltransferase activity	GO:0006730//one-carbon metabolic process;GO:0000154//rRNA modification	gi|68467333|ref|XP_722328.1|/0/likely dimethyladenosine transferase [Candida albicans SC5314]
orf19.3682	726	577	243	85.3654	34.3597	-1.31293	Down	1.13592e-35	7.21184e-35	GO:0044464//cell part	GO:0016462//pyrophosphatase activity	-	gi|68484633|ref|XP_713776.1|/5.18965e-138/hypothetical protein CaO19.3682 [Candida albicans SC5314]
orf19.2222	1137	1004	423	94.8454	38.1909	-1.31235	Down	9.3098e-61	6.89106e-60	-	GO:0004672//protein kinase activity;GO:0032559	GO:0006464//protein modification process	gi|238883707|gb|EEQ47345.1|/0/casein kinase I isoform gamma-3 [Candida albicans WO-1]
orf19.552	1503	64	27	4.57366	1.8441	-1.31043	Down	3.72468e-05	6.7335e-05	-	-	-	gi|68477063|ref|XP_717509.1|/0/potential autophagic vesicle breakdown protein Atg22 [Candida albicans SC5314]
orf19.6602	870	301	127	37.1612	14.9853	-1.31025	Down	2.6004e-19	1.34167e-18	-	-	GO:0006743//ubiquinone metabolic process	gi|68489737|ref|XP_711301.1|/1.65246e-126/potential mitochondrial protein Fmp53 [Candida albicans SC5314]
orf19.3463	2055	669	283	34.9669	14.1369	-1.30652	Down	8.57072e-41	5.62851e-40	GO:0044464//cell part	GO:0032561//guanyl ribonucleotide binding	-	gi|68487179|ref|XP_712533.1|/0/hypothetical protein CaO19.10967 [Candida albicans SC5314]
orf19.5801	1242	3465	1469	299.657	121.417	-1.30334	Down	6.7041e-203	6.90048e-202	-	GO:0046872//metal ion binding;GO:0016728	GO:0009132//nucleoside diphosphate metabolic process	gi|238882096|gb|EEQ45734.1|/0/ribonucleoside-diphosphate reductase small chain 1 [Candida albicans WO-1]
orf19.2590	639	66	28	11.0939	4.49818	-1.30236	Down	3.0641e-05	5.56398e-05	-	GO:0046872//metal ion binding;GO:0016882//cyclo-ligase activity;GO:0032559	GO:0006768//biotin metabolic process	gi|68475264|ref|XP_718350.1|/4.34325e-116/hypothetical protein CaO19.10121 [Candida albicans SC5314]
orf19.4399	1359	254	108	20.0751	8.15801	-1.29912	Down	2.46776e-16	1.19935e-15	GO:0044444//cytoplasmic part	GO:0003723//RNA binding	GO:0002097	gi|74585457|sp|Q59ZY9.1|CTU2_CANAL/0/RecName: Full=Cytoplasmic tRNA 2-thiolation protein 2
orf19.255	2517	1152	490	49.16	19.9845	-1.29861	Down	2.3611e-68	1.80222e-67	-	-	-	gi|68471559|ref|XP_720086.1|/0/potential fungal zinc cluster transcription factor [Candida albicans SC5314]
orf19.230	2643	195	83	7.92465	3.22375	-1.29761	Down	7.374e-13	2.45961e-12	-	-	-	gi|68471772|ref|XP_719929.1|/0/hypothetical protein CaO19.230 [Candida albicans SC5314]
orf19.2371	954	13941	5935	1569.6	638.635	-1.29733	Down	0	0	-	-	-	gi|77022866|ref|XP_888877.1|/2.40247e-153/hypothetical protein CaO19_5372 [Candida albicans SC5314]
orf19.5293	1524	706	301	49.758	20.275	-1.29522	Down	2.1052e-42	1.39752e-41	-	GO:0003824//catalytic activity	-	gi|238881457|gb|EEQ45095.1|/0/conserved hypothetical protein [Candida albicans WO-1]
orf19.3446	615	272	116	47.5047	19.3626	-1.2948	Down	2.64532e-17	1.30959e-16	-	-	-	gi|68478503|ref|XP_716753.1|/2.71245e-96/potential Ran guanine nucleotide release factor Mog1p [Candida albicans SC5314]
orf19.6078	1962	6730	2872	368.433	150.268	-1.29387	Down	0	0	-	GO:0003676//nucleic acid binding	GO:0006259//DNA metabolic process	gi|68473874|ref|XP_719040.1|/0/possible Tca8 reverse transcriptase fragment [Candida albicans SC5314]
orf19.2047	627	576	246	98.6729	40.2761	-1.29273	Down	8.34016e-35	5.25688e-34	-	-	-	gi|68472605|ref|XP_719621.1|/6.42423e-109/hypothetical protein CaO19.9595 [Candida albicans SC5314]
orf19.2108	951	220	94	24.8476	10.1468	-1.29209	Down	3.0852e-14	1.38089e-13	-	GO:0003824//catalytic activity;GO:0016209//antioxidant activity;GO:0043169//cation binding	GO:0072593//reactive oxygen species metabolic process	gi|68472721|ref|XP_719679.1|/7.63491e-176/potential secreted Cu/Zn superoxide dismutase [Candida albicans SC5314]
orf19.475	1101	360	154	35.1203	14.3586	-1.29038	Down	2.6882e-22	1.45835e-21	-	-	-	gi|238879855|gb|EEQ43493.1|/4.86468e-180/conserved hypothetical protein [Candida albicans WO-1]
orf19.1091	2073	217	93	11.2435	4.60536	-1.28771	Down	5.36734e-14	2.36596e-13	-	-	-	gi|68488091|ref|XP_712104.1|/0/potential nucleolar ribosome biogenesis protein [Candida albicans SC5314]
orf19.3678	1716	3133	1345	196.104	80.4609	-1.28526	Down	9.51224e-180	9.50291e-179	-	-	-	gi|68484625|ref|XP_713772.1|/0/hypothetical protein CaO19.3678 [Candida albicans SC5314]
orf19.6766	1191	272	117	24.5301	10.0845	-1.28242	Down	4.53466e-17	2.23408e-16	-	GO:0005488//binding	-	gi|68472133|ref|XP_719862.1|/0/hypothetical protein CaO19.6766 [Candida albicans SC5314]
orf19.4898	690	4159	1791	647.415	266.457	-1.28079	Down	1.15691e-236	1.24971e-235	-	GO:0048037//cofactor binding	GO:0008152//metabolic process	gi|68465005|ref|XP_723580.1|/4.29299e-123/conserved uncharacterized protein [Candida albicans SC5314]
orf19.6862	2310	376	162	17.4831	7.19918	-1.28006	Down	5.9835e-23	3.26344e-22	-	-	-	gi|74584656|sp|Q59RA0.1|RIX1_CANAL/0/RecName: Full=Pre-rRNA-processing protein RIX1
orf19.4689	645	58	25	9.65853	3.97888	-1.27944	Down	0.000117458	0.000202922	-	-	-	gi|238881720|gb|EEQ45358.1|/7.99845e-41/predicted protein [Candida albicans WO-1]
orf19.5106	2946	842	364	30.6989	12.6838	-1.2752	Down	4.4622e-49	3.08619e-48	-	-	-	gi|68476701|ref|XP_717643.1|/0/hypothetical protein CaO19.5106 [Candida albicans SC5314]
orf19.1719	1695	700	303	44.3579	18.3507	-1.27336	Down	5.31608e-41	3.49489e-40	-	GO:0015926//glucosidase activity	GO:0005975//carbohydrate metabolic process	gi|68468461|ref|XP_721790.1|/0/hypothetical protein CaO19.1719 [Candida albicans SC5314]
orf19.5038	4323	302	131	7.50351	3.11076	-1.2703	Down	1.56265e-18	7.92869e-18	-	GO:0003676//nucleic acid binding;GO:0008168//methyltransferase activity	GO:0010467//gene expression;GO:0009451//RNA modification;GO:0006730//one-carbon metabolic process	gi|68491281|ref|XP_710551.1|/0/potential tRNA (Gm18) ribose methyltransferase [Candida albicans SC5314]
orf19.1415	2121	4154	1803	210.363	87.264	-1.26942	Down	3.86746e-233	4.14109e-232	GO:0031224//intrinsic to membrane	GO:0046914//transition metal ion binding;GO:0003824//catalytic activity;GO:0050662//coenzyme binding	GO:0008152//metabolic process	gi|68489228|ref|XP_711543.1|/0/likely ferric reductase [Candida albicans SC5314]
orf19.2863	501	1810	786	388.046	161.052	-1.26871	Down	1.30256e-102	1.14095e-101	-	-	-	gi|68480599|ref|XP_715793.1|/9.14339e-92/hypothetical protein CaO19.2863 [Candida albicans SC5314]
orf19.3071	2685	4238	1845	169.535	70.5395	-1.26508	Down	1.49687e-236	1.61408e-235	-	GO:0016787//hydrolase activity	GO:0009987//cellular process	gi|68492016|ref|XP_710215.1|/0/hypothetical protein CaO19.3071 [Candida albicans SC5314]
orf19.6928	1635	7408	3230	486.66	202.799	-1.26287	Down	0	0	-	GO:0004175//endopeptidase activity	GO:0019538//protein metabolic process	gi|68486750|ref|XP_712729.1|/0/secretory aspartyl proteinase SAP9p [Candida albicans SC5314]
orf19.1183	1647	3897	1701	254.144	106.021	-1.2613	Down	1.12427e-216	1.17702e-215	-	-	-	gi|68487640|ref|XP_712301.1|/0/potential vacuolar protein [Candida albicans SC5314]
orf19.2264	1581	969	423	65.8316	27.4656	-1.26116	Down	2.79372e-55	2.02379e-54	GO:0031224//intrinsic to membrane	GO:0016717//oxidoreductase activity, acting on paired donors, with oxidation of a pair of donors resulting in the reduction of molecular oxygen to two molecules of water;GO:0005506//iron ion binding	GO:0006631//fatty acid metabolic process	gi|68482444|ref|XP_714854.1|/0/likely fatty acid desaturase [Candida albicans SC5314]
orf19.1687	2304	924	404	43.0757	18.0003	-1.25886	Down	1.19541e-52	8.47883e-52	-	GO:0042623//ATPase activity, coupled;GO:0032559	GO:0009207	gi|68468409|ref|XP_721764.1|/0/potential spliceosomal RNA helicase [Candida albicans SC5314]
orf19.1149	1080	1846	809	183.591	76.8962	-1.25551	Down	6.03484e-103	5.29369e-102	-	GO:0046914//transition metal ion binding;GO:0016491//oxidoreductase activity;GO:0004312//fatty acid synthase activity	GO:0008152//metabolic process	gi|68486065|ref|XP_713049.1|/0/hypothetical protein CaO19.8742 [Candida albicans SC5314]
orf19.6745	747	16779	7369	2412.62	1012.67	-1.25243	Down	0	0	-	GO:0016861//intramolecular oxidoreductase activity, interconverting aldoses and ketoses	GO:0006631//fatty acid metabolic process;GO:0006007//glucose catabolic process	gi|13431950|sp|Q9P940.3|TPIS_CANAL/2.46656e-138/RecName: Full=Triosephosphate isomerase; Short=TIM; AltName: Full=Triose-phosphate isomerase
orf19.2643	474	334	147	75.6852	31.836	-1.24935	Down	7.49354e-20	3.92256e-19	GO:0043234//protein complex	GO:0034062//RNA polymerase activity;GO:0003676//nucleic acid binding	GO:0010467//gene expression	gi|68488173|ref|XP_712047.1|/1.96361e-87/potential subunit common to RNA polymerase I, II and III [Candida albicans SC5314]
orf19.7207	2436	3054	1346	134.659	56.7215	-1.24734	Down	2.48234e-167	2.42445e-166	-	GO:0016790//thiolester hydrolase activity;GO:0070011	GO:0019941//modification-dependent protein catabolic process	gi|68481981|ref|XP_715008.1|/0/hypothetical protein CaO19.7207 [Candida albicans SC5314]
orf19.2419	1182	401	177	36.4393	15.3722	-1.24517	Down	2.08662e-23	1.14521e-22	-	-	GO:0009987//cellular process;GO:0010467//gene expression	gi|68485645|ref|XP_713305.1|/0/hypothetical protein CaO19.9957 [Candida albicans SC5314]
orf19.5991	2727	1424	629	56.0877	23.678	-1.24414	Down	9.84266e-79	7.88703e-78	GO:0005634//nucleus	GO:0003676//nucleic acid binding;GO:0042623//ATPase activity, coupled;GO:0032559	GO:0042254//ribosome biogenesis	gi|68465679|ref|XP_723201.1|/0/likely DEAD box ATP-dependent RNA helicase [Candida albicans SC5314]
orf19.2847	1788	206	91	12.3749	5.22461	-1.24402	Down	9.7766e-13	3.166e-12	-	GO:0034062//RNA polymerase activity;GO:0003676//nucleic acid binding	GO:0010467//gene expression	gi|68480567|ref|XP_715778.1|/0/potential RNA Pol III subunit C82 [Candida albicans SC5314]
orf19.2094	3015	975	431	34.7344	14.6747	-1.24303	Down	2.10994e-54	1.51588e-53	-	-	-	gi|68472691|ref|XP_719664.1|/0/hypothetical protein CaO19.9641 [Candida albicans SC5314]
orf19.2642	516	61	27	12.6976	5.37148	-1.24117	Down	0.000114152	0.000197378	-	GO:0046872//metal ion binding	-	gi|68488171|ref|XP_712046.1|/2.73898e-89/hypothetical protein CaO19.10165 [Candida albicans SC5314]
orf19.4017	945	61	27	6.93331	2.933	-1.24117	Down	0.000114152	0.000197434	-	-	-	gi|68467855|ref|XP_722086.1|/2.96402e-180/hypothetical protein CaO19.11500 [Candida albicans SC5314]
orf19.3720	2166	620	275	30.7451	13.0333	-1.23815	Down	5.20476e-35	3.28739e-34	-	-	-	gi|68485223|ref|XP_713445.1|/0/hypothetical protein CaO19.11204 [Candida albicans SC5314]
orf19.2708	768	293	130	40.9779	17.3765	-1.23771	Down	2.28712e-17	1.13502e-16	-	-	GO:0022613//ribonucleoprotein complex biogenesis;GO:0006412//translation	gi|68470904|ref|XP_720459.1|/1.38054e-139/hypothetical protein CaO19.2708 [Candida albicans SC5314]
orf19.1917	1146	1581	702	148.18	62.8829	-1.23661	Down	2.12704e-86	1.76216e-85	-	-	-	gi|68491444|ref|XP_710482.1|/0/potential esterase/lipase [Candida albicans SC5314]
orf19.2527	1287	412	183	34.3844	14.5966	-1.23612	Down	9.46716e-24	5.23347e-23	-	-	-	gi|68475152|ref|XP_718294.1|/0/hypothetical protein CaO19.10062 [Candida albicans SC5314]
orf19.5158	519	3035	1349	628.108	266.824	-1.23512	Down	8.89024e-164	8.66905e-163	GO:0043231//intracellular membrane-bounded organelle	GO:0003824//catalytic activity	GO:0008152//metabolic process	gi|68477953|ref|XP_716980.1|/8.95042e-96/possible mitochondrial protein [Candida albicans SC5314]
orf19.1181	1089	382	170	37.6772	16.0251	-1.23336	Down	4.60862e-22	2.48914e-21	GO:0044464//cell part	GO:0016791//phosphatase activity	-	gi|68487344|ref|XP_712443.1|/0/hypothetical protein CaO19.8772 [Candida albicans SC5314]
orf19.2414	969	615	274	68.1701	29.0273	-1.23173	Down	1.79962e-34	1.12734e-33	-	-	-	gi|68485738|ref|XP_713247.1|/2.7191e-160/hypothetical protein CaO19.2414 [Candida albicans SC5314]
orf19.406	1491	2010	896	144.798	61.6894	-1.23094	Down	1.48459e-108	1.31739e-107	GO:0031224//intrinsic to membrane	GO:0004497//monooxygenase activity;GO:0050662//coenzyme binding	GO:0032787//monocarboxylic acid metabolic process	gi|2498337|sp|Q92206.1|ERG1_CANAL/0/RecName: Full=Squalene monooxygenase; AltName: Full=Squalene epoxidase; Short=SE
orf19.2717	1695	332	148	21.0383	8.96339	-1.2309	Down	2.53946e-19	1.31134e-18	-	-	-	gi|68470920|ref|XP_720467.1|/0/hypothetical protein CaO19.2717 [Candida albicans SC5314]
orf19.2337	1632	213	95	14.0185	5.97563	-1.23017	Down	6.45158e-13	2.19505e-12	GO:0031224//intrinsic to membrane	GO:0005275//amine transmembrane transporter activity	GO:0006865//amino acid transport	gi|68484216|ref|XP_714000.1|/0/likely basic amino acid permease [Candida albicans SC5314]
orf19.1404	1404	213	95	16.295	6.94603	-1.23017	Down	6.45158e-13	2.19382e-12	-	GO:0016627//oxidoreductase activity, acting on the CH-CH group of donors;GO:0050662//coenzyme binding	GO:0006399//tRNA metabolic process	gi|68482886|ref|XP_714669.1|/0/likely tRNA dihydrouridine synthase [Candida albicans SC5314]
orf19.1746	1326	56	25	4.53615	1.93543	-1.22882	Down	0.000246416	0.00041584	-	-	-	gi|68483301|ref|XP_714392.1|/0/hypothetical protein CaO19.1746 [Candida albicans SC5314]
orf19.711	342	170	76	53.3907	22.8122	-1.22678	Down	1.4829e-10	3.64408e-10	-	-	-	gi|68485998|ref|XP_713071.1|/1.05259e-22/hypothetical protein CaO19.711 [Candida albicans SC5314]
orf19.2368	1245	85	38	7.33318	3.13324	-1.22678	Down	6.16304e-06	1.18381e-05	-	-	-	gi|68486953|ref|XP_712658.1|/1.43266e-170/hypothetical protein CaO19.2368 [Candida albicans SC5314]
orf19.6470	558	1937	866	372.854	159.318	-1.2267	Down	4.00672e-104	3.5197e-103	-	GO:0016705//oxidoreductase activity, acting on paired donors, with incorporation or reduction of molecular oxygen;GO:0016209//antioxidant activity	GO:0008152//metabolic process	gi|68469050|ref|XP_721312.1|/1.09888e-100/peroxiredoxin-like protein [Candida albicans SC5314]
orf19.7107	462	1301	582	302.467	129.319	-1.22585	Down	1.80229e-70	1.38258e-69	-	-	GO:0042254//ribosome biogenesis	gi|74591338|sp|Q5AFG1.1|ALB1_CANAL/2.93341e-69/RecName: Full=Ribosome biogenesis protein ALB1
orf19.3287	1380	335	150	26.0741	11.1582	-1.22452	Down	2.4572e-19	1.27208e-18	-	-	-	gi|238879562|gb|EEQ43200.1|/0/conserved hypothetical protein [Candida albicans WO-1]
orf19.6259	1122	276	124	26.4216	11.3451	-1.21965	Down	4.18524e-16	2.01168e-15	-	GO:0003676//nucleic acid binding;GO:0008408//3'-5' exonuclease activity	GO:0010467//gene expression	gi|68474274|ref|XP_718846.1|/0/potential exosome component Rrp43p [Candida albicans SC5314]
orf19.4006	1059	218	98	22.1107	9.49971	-1.21879	Down	5.13746e-13	1.80002e-12	GO:0044424//intracellular part	GO:0016616//oxidoreductase activity, acting on the CH-OH group of donors, NAD or NADP as acceptor;GO:0048037//cofactor binding;GO:0000166//nucleotide binding	GO:0009108//coenzyme biosynthetic process	gi|68467833|ref|XP_722075.1|/0/hypothetical protein CaO19.11489 [Candida albicans SC5314]
orf19.6831	2655	779	351	31.5149	13.5713	-1.21547	Down	2.3649e-42	1.56822e-41	-	GO:0042623//ATPase activity, coupled;GO:0032559	-	gi|74656514|sp|Q5ADL0.1|PRP5_CANAL/0/RecName: Full=Pre-mRNA-processing ATP-dependent RNA helicase PRP5
orf19.7148	1692	206	93	13.077	5.64238	-1.21266	Down	2.72146e-12	8.16839e-12	-	-	GO:0006810//transport	gi|68481658|ref|XP_715197.1|/0/potential drug or polyamine transporter [Candida albicans SC5314]
orf19.2670	876	577	261	70.7481	30.5856	-1.20984	Down	1.38847e-31	8.43009e-31	-	-	-	gi|68470832|ref|XP_720423.1|/1.7663e-168/hypothetical protein CaO19.2670 [Candida albicans SC5314]
orf19.396	636	390	177	65.8643	28.5691	-1.20504	Down	9.71496e-22	5.21486e-21	-	-	GO:0009987//cellular process	gi|74584569|sp|Q59QC2.1|EAF6_CANAL/1.53507e-97/RecName: Full=Chromatin modification-related protein EAF6
orf19.124	1098	773	351	75.6171	32.8159	-1.20432	Down	1.86788e-41	1.23195e-40	GO:0043234//protein complex;GO:0030529//ribonucleoprotein complex	GO:0003676//nucleic acid binding;GO:0005198//structural molecule activity	GO:0010467//gene expression	gi|68483539|ref|XP_714330.1|/9.58677e-128/possible proteasome-interacting protein Cic1 [Candida albicans SC5314]
orf19.6902	2184	766	348	37.672	16.3571	-1.20358	Down	4.67418e-41	3.0762e-40	GO:0031981//nuclear lumen	GO:0003676//nucleic acid binding;GO:0042623//ATPase activity, coupled;GO:0032559	GO:0042254//ribosome biogenesis	gi|74679677|sp|Q59S50.1|DBP7_CANAL/0/RecName: Full=ATP-dependent RNA helicase DBP7
orf19.5159	1035	772	351	80.1161	34.8134	-1.20245	Down	2.63228e-41	1.73424e-40	-	GO:0016763//transferase activity, transferring pentosyl groups	GO:0006144//purine base metabolic process;GO:0009064//glutamine family amino acid metabolic process	gi|68477955|ref|XP_716981.1|/0/hypothetical protein CaO19.5159 [Candida albicans SC5314]
orf19.3153	2157	2582	1177	128.573	56.0153	-1.19869	Down	2.93058e-133	2.74809e-132	-	GO:0016307//phosphatidylinositol phosphate kinase activity	GO:0046488//phosphatidylinositol metabolic process;GO:0006796//phosphate-containing compound metabolic process	gi|238880550|gb|EEQ44188.1|/0/conserved hypothetical protein [Candida albicans WO-1]
orf19.1153	1707	28846	13165	1815.08	791.712	-1.19698	Down	0	0	-	GO:0016831//carboxy-lyase activity;GO:0048037//cofactor binding	GO:0009064//glutamine family amino acid metabolic process	gi|68486140|ref|XP_713020.1|/0/hypothetical protein CaO19.1153 [Candida albicans SC5314]
orf19.2386	744	276	126	39.8455	17.3851	-1.19656	Down	1.13885e-15	5.43131e-15	-	-	-	gi|68485575|ref|XP_713270.1|/2.17875e-78/hypothetical protein CaO19.9922 [Candida albicans SC5314]
orf19.3016	426	576	263	145.23	63.3762	-1.19632	Down	5.27114e-31	3.18771e-30	-	-	-	gi|68468911|ref|XP_721514.1|/1.93041e-77/hypothetical protein CaO19.3016 [Candida albicans SC5314]
orf19.3015	1695	1493	682	94.6091	41.3043	-1.19569	Down	1.49061e-77	1.18667e-76	-	GO:0016787//hydrolase activity	-	gi|74587290|sp|Q5AI37.1|ARX1_CANAL/0/RecName: Full=Probable metalloprotease ARX1; AltName: Full=Associated with ribosomal export complex protein 1
orf19.3852	2388	536	245	24.1087	10.532	-1.19477	Down	6.57672e-29	3.88879e-28	-	-	-	gi|68485065|ref|XP_713522.1|/0/hypothetical protein CaO19.11333 [Candida albicans SC5314]
orf19.6477	1281	385	176	32.2816	14.104	-1.1946	Down	3.30408e-21	1.76122e-20	-	GO:0016741	GO:0006730//one-carbon metabolic process	gi|229891735|sp|Q5AH60.2|TRM82_CANAL/0/RecName: Full=tRNA (guanine-N(7)-)-methyltransferase subunit TRM82; AltName: Full=Transfer RNA methyltransferase 82
orf19.5407	1311	354	162	29.003	12.6851	-1.19307	Down	1.37668e-19	7.17566e-19	-	-	-	gi|238880491|gb|EEQ44129.1|/0/protein SOF1 [Candida albicans WO-1]
orf19.2297	771	997	457	138.894	60.8474	-1.19072	Down	4.73098e-52	3.34009e-51	-	GO:0032561//guanyl ribonucleotide binding;GO:0008238//exopeptidase activity	GO:0035556//intracellular signal transduction	gi|68484251|ref|XP_713902.1|/3.08028e-123/potential ARF-like GTPase [Candida albicans SC5314]
orf19.1609	2001	469	215	25.1749	11.0299	-1.19057	Down	2.30968e-25	1.29673e-24	-	-	-	gi|68468257|ref|XP_721688.1|/0/potential nucleolar ribosome biogenesis factor Kri1p [Candida albicans SC5314]
orf19.7387	1644	411	189	26.8524	11.8016	-1.18607	Down	2.68918e-22	1.45759e-21	-	GO:0004468//lysine N-acetyltransferase activity;GO:0051540	-	gi|68478719|ref|XP_716628.1|/0/hypothetical protein CaO19.7387 [Candida albicans SC5314]
orf19.5388	1344	574	264	45.8728	20.1644	-1.18583	Down	1.70084e-30	1.02151e-29	-	GO:0016741	GO:0006730//one-carbon metabolic process	gi|68476227|ref|XP_717763.1|/0/potential COMPASS histone methyltransferase subunit Swd1p [Candida albicans SC5314]
orf19.1796	1095	1397	644	137.033	60.3743	-1.18252	Down	1.90487e-71	1.46495e-70	-	GO:0016614//oxidoreductase activity, acting on CH-OH group of donors;GO:0000166//nucleotide binding	-	gi|68489420|ref|XP_711461.1|/0/hypothetical protein CaO19.9362 [Candida albicans SC5314]
orf19.4273	2760	78	36	3.03549	1.33898	-1.1808	Down	2.6695e-05	4.87058e-05	-	-	-	gi|68470410|ref|XP_720709.1|/0/hypothetical protein CaO19.11749 [Candida albicans SC5314]
orf19.107	2496	286	132	12.3073	5.42887	-1.1808	Down	7.05938e-16	3.38518e-15	-	GO:0032559;GO:0042623//ATPase activity, coupled	-	gi|68483511|ref|XP_714316.1|/0/potential rRNA biogenesis helicase Dhr2 [Candida albicans SC5314]
orf19.2882	1776	78	36	4.71731	2.08084	-1.1808	Down	2.6695e-05	4.87204e-05	GO:0044464//cell part	-	GO:0006810//transport	gi|68480882|ref|XP_715594.1|/0/potential purine permease [Candida albicans SC5314]
orf19.3004	1233	3663	1692	319.093	140.87	-1.17961	Down	1.60876e-183	1.6151e-182	-	-	-	gi|73921183|sp|Q5AI48.1|YFAS1_CANAL/0/RecName: Full=FAS1 domain-containing protein CaO19.3004; Flags: Precursor
orf19.5864	1638	441	204	28.9179	12.7849	-1.17753	Down	1.48336e-23	8.17049e-23	-	GO:0019206//nucleoside kinase activity;GO:0032559	GO:0006796//phosphate-containing compound metabolic process	gi|68465437|ref|XP_723080.1|/0/likely uridine kinase [Candida albicans SC5314]
orf19.4738	1677	573	266	36.6999	16.2828	-1.17243	Down	6.28008e-30	3.76435e-29	-	-	-	gi|68464695|ref|XP_723425.1|/0/hypothetical protein CaO19.4738 [Candida albicans SC5314]
orf19.7419	543	258	120	51.0344	22.6862	-1.16965	Down	2.83774e-14	1.27949e-13	-	GO:0003824//catalytic activity	-	gi|68479830|ref|XP_716084.1|/4.08511e-89/hypothetical protein CaO19.7419 [Candida albicans SC5314]
orf19.4234	1392	419	195	32.3309	14.3805	-1.16879	Down	3.26762e-22	1.76642e-21	-	-	-	gi|74627407|sp|Q5AGE5.1|CTR86_CANAL/0/RecName: Full=Copper transport protein 86
orf19.1304	915	133	62	15.6125	6.95586	-1.1664	Down	5.2868e-08	1.14948e-07	-	GO:0004518//nuclease activity	-	gi|68486193|ref|XP_709945.1|/4.82178e-156/likely exosome component Rrp4p [Candida albicans SC5314]
orf19.4778	2070	907	423	47.063	20.9773	-1.16576	Down	5.4464e-46	3.72059e-45	GO:0043231//intracellular membrane-bounded organelle	GO:0046914//transition metal ion binding;GO:0001071//nucleic acid binding transcription factor activity	GO:0006351//transcription, DNA-dependent	gi|68464773|ref|XP_723464.1|/0/potential fungal zinc cluster transcription factor [Candida albicans SC5314]
orf19.4664	615	596	278	104.091	46.4034	-1.16555	Down	8.6621e-31	5.22289e-30	-	GO:0016407//acetyltransferase activity	-	gi|68466504|ref|XP_722734.1|/7.89202e-96/potential histone N-acetyl tranferase (GNAT family) [Candida albicans SC5314]
orf19.5677	1974	276	129	15.0177	6.70846	-1.16262	Down	4.90998e-15	2.31098e-14	GO:0031224//intrinsic to membrane	-	GO:0030001//metal ion transport	gi|68485455|ref|XP_713405.1|/0/potential urea active transport protein [Candida albicans SC5314]
orf19.7599	1911	859	402	48.2809	21.5946	-1.16078	Down	2.31734e-43	1.54844e-42	-	-	-	gi|68473111|ref|XP_719361.1|/0/potential U3 snoRNP protein [Candida albicans SC5314]
orf19.1760	876	4175	1954	511.912	228.982	-1.16066	Down	1.33667e-203	1.37815e-202	GO:0044464//cell part	GO:0032561//guanyl ribonucleotide binding;GO:0017111//nucleoside-triphosphatase activity	GO:0035556//intracellular signal transduction;GO:0009207	gi|68483327|ref|XP_714405.1|/8.37784e-94/Ras family GTPase involved in hyphal growth [Candida albicans SC5314]
orf19.4043	2259	14891	6984	708.028	317.372	-1.15763	Down	0	0	-	-	-	gi|68467905|ref|XP_722111.1|/0/hypothetical protein CaO19.11525 [Candida albicans SC5314]
orf19.7214	1509	2880	1353	204.996	92.0426	-1.15523	Down	4.97498e-140	4.69399e-139	-	GO:0043167//ion binding;GO:0008422//beta-glucosidase activity	GO:0044238//primary metabolic process	gi|68481995|ref|XP_715015.1|/0/hypothetical protein CaO19.7214 [Candida albicans SC5314]
orf19.1915	1704	889	418	56.037	25.1818	-1.154	Down	2.05674e-44	1.38796e-43	GO:0043231//intracellular membrane-bounded organelle;GO:0032991//macromolecular complex	GO:0005488//binding	GO:0042254//ribosome biogenesis	gi|68491440|ref|XP_710480.1|/0/hypothetical protein CaO19.1915 [Candida albicans SC5314]
orf19.4911	963	336	158	37.4762	16.8427	-1.15385	Down	8.83336e-18	4.40875e-17	-	-	-	gi|68465031|ref|XP_723593.1|/4.03125e-148/hypothetical protein CaO19.4911 [Candida albicans SC5314]
orf19.7250	444	525	247	127.005	57.1076	-1.15312	Down	7.05228e-27	4.05241e-26	-	-	-	gi|68482061|ref|XP_715048.1|/1.15944e-45/potential PP1 phosphatase inhibitor [Candida albicans SC5314]
orf19.3962	1698	1579	743	99.882	44.9191	-1.1529	Down	2.17726e-77	1.72656e-76	GO:0031981//nuclear lumen	GO:0003676//nucleic acid binding;GO:0042623//ATPase activity, coupled;GO:0032559	GO:0042254//ribosome biogenesis	gi|238882849|gb|EEQ46487.1|/0/hypothetical protein CAWG_04842 [Candida albicans WO-1]
orf19.1428	516	136	64	28.3095	12.7324	-1.15278	Down	5.00106e-08	1.08891e-07	-	-	-	gi|68489252|ref|XP_711555.1|/3.71905e-70/hypothetical protein CaO19.1428 [Candida albicans SC5314]
orf19.5667	2394	2894	1362	129.843	58.4027	-1.15266	Down	3.31166e-140	3.12944e-139	GO:0044464//cell part	GO:0008324//cation transmembrane transporter activity	GO:0006812//cation transport	gi|68485435|ref|XP_713395.1|/0/hypothetical protein CaO19.13112 [Candida albicans SC5314]
orf19.3059	1035	1817	859	188.563	85.1987	-1.14615	Down	5.86902e-88	4.93579e-87	-	GO:0008135//translation factor activity, nucleic acid binding;GO:0046914//transition metal ion binding;GO:0003677//DNA binding;GO:0001071//nucleic acid binding transcription factor activity	GO:0006351//transcription, DNA-dependent;GO:0006412//translation	gi|68468997|ref|XP_721557.1|/0/likely transcription factor TFIIB [Candida albicans SC5314]
orf19.4574	1671	95	45	6.10647	2.7645	-1.14332	Down	6.15604e-06	1.18284e-05	-	-	-	gi|68466033|ref|XP_722791.1|/0/hypothetical protein CaO19.12043 [Candida albicans SC5314]
orf19.1357	1545	1104	523	76.7509	34.7499	-1.14318	Down	6.15096e-54	4.40879e-53	GO:0044464//cell part	GO:0015932//nucleobase-containing compound transmembrane transporter activity	GO:0015931//nucleobase-containing compound transport	gi|78192256|gb|ABB30180.1|/0/Fcy21p [Candida albicans]
orf19.524	1347	401	190	31.9757	14.4799	-1.14292	Down	1.24975e-20	6.59271e-20	-	GO:0046914//transition metal ion binding;GO:0019787//small conjugating protein ligase activity	GO:0032446//protein modification by small protein conjugation	gi|68477003|ref|XP_717479.1|/0/hypothetical protein CaO19.8157 [Candida albicans SC5314]
orf19.5850	2145	1243	589	62.2424	28.1882	-1.1428	Down	1.78833e-60	1.32211e-59	-	-	-	gi|238879993|gb|EEQ43631.1|/0/nucleolar complex protein 2 [Candida albicans WO-1]
orf19.7618	831	396	188	51.1843	23.224	-1.14009	Down	2.56836e-20	1.35137e-19	GO:0005634//nucleus	GO:0003676//nucleic acid binding	-	gi|74591129|sp|Q5ACM4.1|PNO1_CANAL/1.17143e-142/RecName: Full=Pre-rRNA-processing protein PNO1
orf19.5521	810	1974	940	261.761	119.13	-1.13571	Down	4.97364e-94	4.26491e-93	-	GO:0051540	GO:0031163	gi|68473290|ref|XP_719203.1|/1.11525e-150/hypothetical protein CaO19.12967 [Candida albicans SC5314]
orf19.223	2385	1805	860	81.289	37.0161	-1.13491	Down	4.80112e-86	3.96676e-85	-	GO:0004672//protein kinase activity;GO:0032559	GO:0006464//protein modification process	gi|68487091|ref|XP_712606.1|/0/likely protein kinase [Candida albicans SC5314]
orf19.1367.1	243	243	116	107.41	49.004	-1.13215	Down	6.47494e-13	2.20054e-12	-	-	-	gi|380353283|emb|CCG26039.1|/9.94551e-26/hypothetical protein CORT_0C06670 [Candida orthopsilosis]
orf19.6311	306	603	288	211.66	96.6165	-1.13141	Down	9.294e-30	5.54917e-29	-	-	-	gi|68490128|ref|XP_711113.1|/4.5417e-34/hypothetical protein CaO19.13688 [Candida albicans SC5314]
orf19.3159	7506	512	245	7.32663	3.35072	-1.12868	Down	2.03094e-25	1.14233e-24	-	GO:0016788//hydrolase activity, acting on ester bonds;GO:0003676//nucleic acid binding	GO:0006281//DNA repair	gi|238880554|gb|EEQ44192.1|/0/conserved hypothetical protein [Candida albicans WO-1]
orf19.212	747	194	93	27.8948	12.7803	-1.12607	Down	1.61348e-10	3.96018e-10	-	-	-	gi|68487071|ref|XP_712596.1|/2.92721e-123/hypothetical protein CaO19.212 [Candida albicans SC5314]
orf19.3195	1800	673	323	40.1592	18.4209	-1.12439	Down	1.04124e-32	6.39814e-32	GO:0031224//intrinsic to membrane	GO:0005275//amine transmembrane transporter activity	GO:0006865//amino acid transport	gi|238882581|gb|EEQ46219.1|/0/general amino-acid permease GAP1 [Candida albicans WO-1]
orf19.6710	1338	1331	639	106.848	49.0258	-1.12394	Down	5.75072e-63	4.29303e-62	-	-	-	gi|68472029|ref|XP_719810.1|/0/hypothetical protein CaO19.6710 [Candida albicans SC5314]
orf19.5049	930	104	50	12.0114	5.51909	-1.1219	Down	3.15616e-06	6.17694e-06	-	-	-	gi|68476589|ref|XP_717587.1|/3.01396e-145/hypothetical protein CaO19.5049 [Candida albicans SC5314]
orf19.4439	444	191	92	46.2055	21.2709	-1.11918	Down	2.7348e-10	6.64569e-10	-	-	-	gi|68483990|ref|XP_714085.1|/1.83824e-67/hypothetical protein CaO19.11919 [Candida albicans SC5314]
orf19.6358	414	112	54	29.0577	13.3898	-1.11779	Down	1.41297e-06	2.8241e-06	-	GO:0016879//ligase activity, forming carbon-nitrogen bonds	GO:0006464//protein modification process	gi|241950201|ref|XP_002417823.1|/2.55838e-66/ubiquitin-conjugating enzyme variant MMS2 homologue, putative [Candida dubliniensis CD36]
orf19.1849	2154	456	220	22.7385	10.4847	-1.11685	Down	1.87011e-22	1.01544e-21	-	-	-	gi|74584297|sp|Q59MU1.1|UTP25_CANAL/0/RecName: Full=U3 small nucleolar RNA-associated protein 25; Short=U3 snoRNA-associated protein 25; AltName: Full=U three protein 25
orf19.1800	1329	899	434	72.657	33.5232	-1.11594	Down	1.26069e-42	8.37809e-42	-	-	-	gi|68489428|ref|XP_711465.1|/0/potential vacuolar targeting protein [Candida albicans SC5314]
orf19.6079	900	1561	754	186.296	86.0021	-1.11515	Down	1.24849e-72	9.63796e-72	-	GO:0005488//binding	-	gi|68473876|ref|XP_719041.1|/1.01328e-174/hypothetical protein CaO19.6079 [Candida albicans SC5314]
orf19.2191	1038	180	87	18.6259	8.60403	-1.11423	Down	1.02155e-09	2.42837e-09	-	-	-	gi|68479965|ref|XP_716031.1|/0/hypothetical protein CaO19.2191 [Candida albicans SC5314]
orf19.5500	948	93	45	10.537	4.87286	-1.11262	Down	1.2095e-05	2.26907e-05	GO:0030529//ribonucleoprotein complex	GO:0005198//structural molecule activity	GO:0010467//gene expression	gi|68489348|ref|XP_711515.1|/9.78755e-107/hypothetical protein CaO19.12955 [Candida albicans SC5314]
orf19.7664	405	682	330	180.872	83.6448	-1.11262	Down	1.3555e-32	8.31244e-32	-	-	-	gi|68473235|ref|XP_719423.1|/4.9014e-41/hypothetical protein CaO19.7664 [Candida albicans SC5314]
orf19.2107.1	270	6732	3260	2678.08	1239.46	-1.11148	Down	2e-305	2.26444e-304	-	-	-	gi|238881839|gb|EEQ45477.1|/1.00446e-41/conserved hypothetical protein [Candida albicans WO-1]
orf19.4401	969	132	64	14.6316	6.7801	-1.10971	Down	1.90845e-07	4.01661e-07	-	GO:0004721//phosphoprotein phosphatase activity	GO:0006796//phosphate-containing compound metabolic process;GO:0006464//protein modification process	gi|68481871|ref|XP_715177.1|/0/potential dual specificity phosphatase [Candida albicans SC5314]
orf19.2436	2649	1633	792	66.2136	30.6919	-1.10927	Down	2.8967e-75	2.26476e-74	-	GO:0004672//protein kinase activity;GO:0032559	GO:0006464//protein modification process	gi|238878943|gb|EEQ42581.1|/0/protein kinase dsk1 [Candida albicans WO-1]
orf19.6455	669	475	231	76.2624	35.4459	-1.10535	Down	5.78672e-23	3.16175e-22	-	-	-	gi|68469022|ref|XP_721298.1|/8.48856e-73/hypothetical protein CaO19.6455 [Candida albicans SC5314]
orf19.3914	1293	929	452	77.172	35.8856	-1.10467	Down	2.65376e-43	1.7713e-42	-	GO:0003723//RNA binding	-	gi|68467651|ref|XP_721984.1|/2.58046e-170/hypothetical protein CaO19.11396 [Candida albicans SC5314]
orf19.3161	963	380	185	42.3838	19.7208	-1.10379	Down	1.21198e-18	6.16989e-18	GO:0031981//nuclear lumen	GO:0003676//nucleic acid binding	GO:0042254//ribosome biogenesis	gi|146286153|sp|Q59YL9.2|ESF2_CANAL/1.25606e-141/RecName: Full=Pre-rRNA-processing protein ESF2; AltName: Full=18S rRNA factor 2
orf19.3064.1	240	451	220	201.84	94.1004	-1.10094	Down	9.42454e-22	5.06341e-21	-	-	-	gi|380352480|emb|CCG22706.1|/1.26131e-20/hypothetical protein CORT_0B10020 [Candida orthopsilosis]
orf19.6498	1029	2183	1065	227.867	106.246	-1.10078	Down	9.0534e-99	7.85142e-98	-	-	-	gi|68469098|ref|XP_721336.1|/2.2809e-152/hypothetical protein CaO19.6498 [Candida albicans SC5314]
orf19.86	486	1383	675	305.653	142.576	-1.10016	Down	3.39454e-63	2.54341e-62	-	GO:0004601//peroxidase activity	GO:0008152//metabolic process;GO:0006950//response to stress	gi|68483469|ref|XP_714295.1|/4.62978e-90/potential glutathione peroxidase/redox transducer [Candida albicans SC5314]
orf19.801	2661	1678	820	67.7314	31.6336	-1.09837	Down	4.3335e-76	3.40991e-75	GO:0044427;GO:0043231//intracellular membrane-bounded organelle	GO:0043565//sequence-specific DNA binding	GO:0006278//RNA-dependent DNA replication	gi|68469830|ref|XP_720925.1|/0/hypothetical protein CaO19.801 [Candida albicans SC5314]
orf19.2604	1497	272	133	19.516	9.12032	-1.0975	Down	1.17581e-13	4.87384e-13	-	-	-	gi|68475292|ref|XP_718364.1|/0/hypothetical protein CaO19.10135 [Candida albicans SC5314]
orf19.5225	378	594	291	168.786	79.0281	-1.09476	Down	6.66126e-28	3.88616e-27	-	GO:0016301//kinase activity	-	gi|238878366|gb|EEQ42004.1|/2.66613e-39/conserved hypothetical protein [Candida albicans WO-1]
orf19.1803	1155	102	50	9.48552	4.44394	-1.09389	Down	6.13506e-06	1.17955e-05	-	GO:0003824//catalytic activity	-	gi|68348688|ref|XP_710190.1|/0/hypothetical protein CaO19.1803 [Candida albicans SC5314]
orf19.3881	1080	673	330	66.932	31.3668	-1.09346	Down	2.4409e-31	1.47905e-30	-	-	-	gi|68485115|ref|XP_713547.1|/0/hypothetical protein CaO19.11362 [Candida albicans SC5314]
orf19.5239	1416	261	128	19.7979	9.27955	-1.09322	Down	4.33922e-13	1.55146e-12	GO:0044424//intracellular part	GO:0004812//aminoacyl-tRNA ligase activity;GO:0032559	GO:0006418//tRNA aminoacylation for protein translation	gi|68479127|ref|XP_716369.1|/0/hypothetical protein CaO19.12703 [Candida albicans SC5314]
orf19.5550	693	269	132	41.6929	19.5533	-1.09239	Down	1.97553e-13	7.71288e-13	GO:0030529//ribonucleoprotein complex	-	GO:0022613//ribonucleoprotein complex biogenesis	gi|68473344|ref|XP_719230.1|/2.6225e-128/potential rRNA processing factor [Candida albicans SC5314]
orf19.4763	681	377	185	59.4617	27.8872	-1.09236	Down	3.1806e-18	1.6058e-17	-	-	-	gi|68464743|ref|XP_723449.1|/3.95207e-81/potential mitochondrial protein [Candida albicans SC5314]
orf19.1798	4476	599	295	14.3741	6.76569	-1.08716	Down	7.9511e-28	4.62981e-27	GO:0044464//cell part	GO:0008047//enzyme activator activity	GO:0043087//regulation of GTPase activity;GO:0009966//regulation of signal transduction	gi|68489457|ref|XP_711446.1|/0/potential GTPase Activating Protein [Candida albicans SC5314]
orf19.3130	822	751	370	98.1321	46.2072	-1.08661	Down	1.92367e-34	1.20259e-33	-	GO:0032561//guanyl ribonucleotide binding	-	gi|118573557|sp|Q5A0W6.2|GPN3_CANAL/4.06581e-156/RecName: Full=GPN-loop GTPase 3 homolog CaO19.3130/CaO19.10642
orf19.4125	1239	142	70	12.3101	5.79972	-1.08578	Down	1.1077e-07	2.35974e-07	GO:0044464//cell part	GO:0046914//transition metal ion binding	-	gi|68491858|ref|XP_710284.1|/0/potential TFIIIA transcription factor [Candida albicans SC5314]
orf19.3325	1983	11635	5742	630.212	297.249	-1.08416	Down	0	0	-	GO:0016740//transferase activity	-	gi|68475063|ref|XP_718417.1|/0/potential glycoprotein glucosyltransferase [Candida albicans SC5314]
orf19.4855	453	93	46	22.051	10.4241	-1.08091	Down	1.91503e-05	3.53944e-05	GO:0043231//intracellular membrane-bounded organelle	-	-	gi|68464925|ref|XP_723540.1|/4.29649e-78/hypothetical protein CaO19.4855 [Candida albicans SC5314]
orf19.1332	1662	818	405	52.8646	25.0152	-1.0795	Down	5.4962e-37	3.54097e-36	-	-	-	gi|68488958|ref|XP_711672.1|/0/hypothetical protein CaO19.1332 [Candida albicans SC5314]
orf19.5229	3015	1290	640	45.9563	21.7908	-1.07655	Down	4.4112e-57	3.22223e-56	-	GO:0003676//nucleic acid binding;GO:0008408//3'-5' exonuclease activity	-	gi|68479109|ref|XP_716360.1|/0/likely exosome component Dis1p [Candida albicans SC5314]
orf19.1198	546	306	152	60.1965	28.5779	-1.07478	Down	1.01047e-14	4.7017e-14	-	-	-	gi|68487668|ref|XP_712315.1|/1.73549e-103/hypothetical protein CaO19.1198 [Candida albicans SC5314]
orf19.4268	2400	471	234	21.0791	10.0089	-1.07454	Down	7.83146e-22	4.21864e-21	GO:0030684//preribosome	-	GO:0042254//ribosome biogenesis	gi|68470400|ref|XP_720704.1|/0/hypothetical protein CaO19.11744 [Candida albicans SC5314]
orf19.3778	1560	338	168	23.2721	11.0552	-1.07388	Down	4.3715e-16	2.09956e-15	-	-	-	gi|238881371|gb|EEQ45009.1|/0/hypothetical protein CAWG_03315 [Candida albicans WO-1]
orf19.567	1083	171	85	16.9594	8.05695	-1.07378	Down	7.69932e-09	1.75713e-08	GO:0043231//intracellular membrane-bounded organelle	GO:0008135//translation factor activity, nucleic acid binding;GO:0046914//transition metal ion binding	GO:0006412//translation	gi|68483681|ref|XP_714199.1|/0/hypothetical protein CaO19.567 [Candida albicans SC5314]
orf19.2789	960	535	266	59.8584	28.444	-1.07343	Down	1.51599e-24	8.4415e-24	-	-	-	gi|68488862|ref|XP_711731.1|/2.58155e-171/hypothetical protein CaO19.2789 [Candida albicans SC5314]
orf19.3781	1401	420	209	32.1999	15.314	-1.0722	Down	1.42298e-19	7.41064e-19	-	-	-	gi|68477430|ref|XP_717186.1|/0/hypothetical protein CaO19.3781 [Candida albicans SC5314]
orf19.7106	2304	3562	1773	166.056	78.9962	-1.07181	Down	3.16604e-153	3.04358e-152	-	GO:0008238//exopeptidase activity	GO:0019538//protein metabolic process	gi|68471241|ref|XP_720397.1|/0/hypothetical protein CaO19.7106 [Candida albicans SC5314]
orf19.211	543	494	246	97.717	46.5067	-1.07117	Down	1.03002e-22	5.61276e-22	GO:0044464//cell part	GO:0046914//transition metal ion binding;GO:0003677//DNA binding;GO:0001071//nucleic acid binding transcription factor activity;GO:0016741	GO:0006259//DNA metabolic process;GO:0006351//transcription, DNA-dependent;GO:0006730//one-carbon metabolic process	gi|238883765|gb|EEQ47403.1|/1.40078e-97/conserved hypothetical protein [Candida albicans WO-1]
orf19.4779	1863	1242	619	71.6064	34.1081	-1.06997	Down	1.70398e-54	1.22566e-53	-	-	GO:0006810//transport	gi|68464775|ref|XP_723465.1|/0/potential MFS-MDR transporter [Candida albicans SC5314]
orf19.6529	735	5035	2510	735.792	350.563	-1.06962	Down	4.90704e-215	5.12849e-214	-	GO:0016879//ligase activity, forming carbon-nitrogen bonds;GO:0032559	GO:0006464//protein modification process	gi|68469160|ref|XP_721367.1|/2.58739e-92/hypothetical protein CaO19.6529 [Candida albicans SC5314]
orf19.1061	411	11031	5504	2882.81	1374.73	-1.06833	Down	0	0	GO:0000785//chromatin;GO:0043231//intracellular membrane-bounded organelle	GO:0003676//nucleic acid binding	GO:0006259//DNA metabolic process;GO:0033554//cellular response to stress;GO:0034728//nucleosome organization	gi|68484797|ref|XP_713710.1|/6.52504e-70/histone H3 [Candida albicans SC5314]
orf19.4799	1833	986	492	57.7773	27.5539	-1.06825	Down	1.63626e-43	1.09694e-42	GO:0043231//intracellular membrane-bounded organelle	GO:0003676//nucleic acid binding	-	gi|238878650|gb|EEQ42288.1|/0/conserved hypothetical protein [Candida albicans WO-1]
orf19.4816	1350	1345	672	107.012	51.0994	-1.06639	Down	1.48376e-58	1.09035e-57	-	-	-	gi|68464849|ref|XP_723502.1|/0/hypothetical protein CaO19.4816 [Candida albicans SC5314]
orf19.4680	1146	128	64	11.9969	5.73291	-1.06532	Down	7.01828e-07	1.42985e-06	-	GO:0016301//kinase activity	GO:0007186//G-protein coupled receptor signaling pathway;GO:0006796//phosphate-containing compound metabolic process	gi|68466239|ref|XP_722894.1|/0/possible sphingosine kinase-like protein [Candida albicans SC5314]
orf19.6898	900	78	39	9.30883	4.44838	-1.06532	Down	0.000110675	0.000191962	-	GO:0005506//iron ion binding;GO:0016701//oxidoreductase activity, acting on single donors with incorporation of molecular oxygen	GO:0044237//cellular metabolic process	gi|238883278|gb|EEQ46916.1|/3.49067e-167/conserved hypothetical protein [Candida albicans WO-1]
orf19.1681	561	308	154	58.9699	28.1798	-1.06532	Down	1.28366e-14	5.95019e-14	-	-	-	gi|68468397|ref|XP_721758.1|/2.03252e-102/hypothetical protein CaO19.1681 [Candida albicans SC5314]
orf19.3364	459	406	203	95.0071	45.4008	-1.06532	Down	8.63758e-19	4.40452e-18	-	-	-	gi|68489126|ref|XP_711584.1|/3.71564e-85/hypothetical protein CaO19.3364 [Candida albicans SC5314]
orf19.793	1020	799	400	84.1375	40.2569	-1.06351	Down	2.4473e-35	1.54894e-34	-	GO:0004674//protein serine/threonine kinase activity;GO:0032559	GO:0006464//protein modification process	gi|68469814|ref|XP_720917.1|/0/likely protein kinase [Candida albicans SC5314]
orf19.2076	1005	547	274	58.4607	27.9875	-1.06268	Down	1.11647e-24	6.2282e-24	-	GO:0003824//catalytic activity	-	gi|68472657|ref|XP_719647.1|/0/hypothetical protein CaO19.9623 [Candida albicans SC5314]
orf19.2172	981	1976	992	216.352	103.806	-1.05949	Down	2.73796e-84	2.24696e-83	-	GO:0016616//oxidoreductase activity, acting on the CH-OH group of donors, NAD or NADP as acceptor	GO:0008152//metabolic process	gi|68479926|ref|XP_716013.1|/0/hypothetical protein CaO19.2172 [Candida albicans SC5314]
orf19.4492	1281	533	268	44.6911	21.4766	-1.05722	Down	6.71812e-24	3.72052e-23	-	-	-	gi|68486366|ref|XP_712918.1|/4.70545e-124/likely EBNA-like pre-rRNA processing factor EBP2p [Candida albicans SC5314]
orf19.3047	3630	2479	1247	73.3521	35.2647	-1.05661	Down	8.34742e-105	7.35391e-104	-	-	-	gi|68468973|ref|XP_721545.1|/0/hypothetical protein CaO19.3047 [Candida albicans SC5314]
orf19.563	768	161	81	22.5168	10.8269	-1.05638	Down	3.22766e-08	7.09853e-08	-	-	-	gi|238883800|gb|EEQ47438.1|/3.11863e-91/conserved hypothetical protein [Candida albicans WO-1]
orf19.4595	1314	675	340	55.1761	26.5622	-1.05467	Down	1.00295e-29	5.9825e-29	-	-	-	gi|68466075|ref|XP_722812.1|/0/hypothetical protein CaO19.12064 [Candida albicans SC5314]
orf19.2168.3	522	3482	1755	716.475	345.133	-1.05376	Down	8.81634e-146	8.42236e-145	-	-	-	gi|238883701|gb|EEQ47339.1|/7.08673e-85/protein YOP1 [Candida albicans WO-1]
orf19.1258	714	623	315	93.7201	45.289	-1.0492	Down	2.42938e-27	1.39993e-26	-	-	-	gi|68478808|ref|XP_716566.1|/3.22998e-44/hypothetical protein CaO19.1258 [Candida albicans SC5314]
orf19.5406	1326	1404	710	113.728	54.9661	-1.04897	Down	1.80582e-59	1.33022e-58	-	GO:0042578//phosphoric ester hydrolase activity	GO:0006796//phosphate-containing compound metabolic process	gi|68476257|ref|XP_717778.1|/4.40835e-173/hypothetical protein CaO19.5406 [Candida albicans SC5314]
orf19.3248	1002	172	87	18.4376	8.91316	-1.04864	Down	1.34048e-08	3.01534e-08	-	-	-	gi|68475997|ref|XP_717939.1|/1.51376e-153/hypothetical protein CaO19.3248 [Candida albicans SC5314]
orf19.747	1221	419	212	36.8588	17.8238	-1.0482	Down	7.0614e-19	3.61284e-18	GO:0043231//intracellular membrane-bounded organelle	GO:0051536//iron-sulfur cluster binding;GO:0043169//cation binding;GO:0032559	-	gi|68490388|ref|XP_710994.1|/0/hypothetical protein CaO19.747 [Candida albicans SC5314]
orf19.7554	1683	162	82	10.3389	5.00161	-1.04762	Down	3.62672e-08	7.94189e-08	-	-	GO:0006810//transport	gi|68473021|ref|XP_719316.1|/0/potential MFS-MDR transporter [Candida albicans SC5314]
orf19.3087.1	243	77	39	34.0351	16.4755	-1.0467	Down	0.000153133	0.000262109	-	-	-	-
orf19.3833	4200	1305	661	33.3737	16.1559	-1.04665	Down	3.30204e-55	2.38637e-54	-	GO:0008135//translation factor activity, nucleic acid binding	GO:0006412//translation	gi|241954704|ref|XP_002420073.1|/0/TFIIIC subunit, putative; subunit of the RNA polymerase III transcription initiation factor complex (TFIIIC), putative [Candida dubliniensis CD36]
orf19.7342	4113	294	149	7.67771	3.71884	-1.04582	Down	1.1991e-13	4.94688e-13	-	GO:0003824//catalytic activity	-	gi|68479084|ref|XP_716476.1|/0/potential a-pheromone maturation protease [Candida albicans SC5314]
orf19.348	2157	1887	957	93.9647	45.5451	-1.04482	Down	8.45434e-79	6.78344e-78	-	-	-	gi|68471739|ref|XP_720176.1|/0/potential cell wall beta-glucan synthase [Candida albicans SC5314]
orf19.2850	5757	4426	2245	82.5768	40.0313	-1.04461	Down	3.67402e-182	3.68245e-181	-	-	-	gi|68480574|ref|XP_715781.1|/0/hypothetical protein CaO19.2850 [Candida albicans SC5314]
orf19.7546	1605	410	208	27.4379	13.3036	-1.04436	Down	2.10488e-18	1.06533e-17	GO:0043231//intracellular membrane-bounded organelle	GO:0003676//nucleic acid binding;GO:0042623//ATPase activity, coupled;GO:0032559	GO:0042254//ribosome biogenesis	gi|161784286|sp|Q5ACU6.2|RRP3_CANAL/0/RecName: Full=ATP-dependent rRNA helicase RRP3
orf19.4519	2163	193	98	9.58393	4.65104	-1.04307	Down	2.06388e-09	4.81625e-09	-	GO:0017111//nucleoside-triphosphatase activity;GO:0032559	-	gi|68486418|ref|XP_712944.1|/0/hypothetical protein CaO19.4519 [Candida albicans SC5314]
orf19.2831	870	193	98	23.8276	11.5634	-1.04307	Down	2.06388e-09	4.81441e-09	-	-	-	gi|68480426|ref|XP_715812.1|/8.03603e-81/hypothetical protein CaO19.10349 [Candida albicans SC5314]
orf19.5346	1212	1350	686	119.639	58.1034	-1.042	Down	1.19835e-56	8.73267e-56	-	GO:0008135//translation factor activity, nucleic acid binding	GO:0006412//translation	gi|238883911|gb|EEQ47549.1|/0/conserved hypothetical protein [Candida albicans WO-1]
orf19.5865	2598	597	304	24.6819	12.012	-1.03898	Down	7.105e-26	4.04469e-25	-	GO:0032559;GO:0042623//ATPase activity, coupled	-	gi|68465439|ref|XP_723081.1|/0/likely spliceosomal DEAD box ATPase [Candida albicans SC5314]
orf19.6707	1167	620	316	57.0642	27.7969	-1.03766	Down	9.31548e-27	5.34286e-26	-	GO:0003824//catalytic activity	-	gi|68488001|ref|XP_712159.1|/0/hypothetical protein CaO19.6707 [Candida albicans SC5314]
orf19.3708	1197	153	78	13.729	6.6893	-1.0373	Down	1.10209e-07	2.34861e-07	-	GO:0004175//endopeptidase activity	GO:0019538//protein metabolic process	gi|68490225|ref|XP_711061.1|/0/secretory aspartyl proteinase SAP2p [Candida albicans SC5314]
orf19.5621	2766	547	279	21.2411	10.3546	-1.03659	Down	9.2976e-24	5.14439e-23	-	GO:0005543//phospholipid binding	GO:0009987//cellular process	gi|68473478|ref|XP_719297.1|/0/hypothetical protein CaO19.13066 [Candida albicans SC5314]
orf19.4970	1728	443	226	27.5361	13.4259	-1.0363	Down	1.56947e-19	8.15966e-19	-	-	-	gi|68467494|ref|XP_722180.1|/0/hypothetical protein CaO19.4970 [Candida albicans SC5314]
orf19.1075	1134	266	136	25.1948	12.3114	-1.03314	Down	2.87538e-12	8.61346e-12	-	-	-	gi|68488059|ref|XP_712088.1|/4.55184e-104/hypothetical protein CaO19.1075 [Candida albicans SC5314]
orf19.309	1578	84	43	5.71762	2.79732	-1.03137	Down	9.2996e-05	0.000162637	-	-	GO:0006810//transport	gi|68471659|ref|XP_720136.1|/0/hypothetical protein CaO19.7941 [Candida albicans SC5314]
orf19.1509	2772	2463	1262	95.4364	46.7354	-1.03002	Down	5.9451e-100	5.17046e-99	-	-	-	gi|68466719|ref|XP_722555.1|/0/hypothetical protein CaO19.1509 [Candida albicans SC5314]
orf19.480	729	443	227	65.2708	31.9653	-1.02993	Down	2.3819e-19	1.23624e-18	-	-	-	gi|68476909|ref|XP_717432.1|/2.97853e-125/hypothetical protein CaO19.8110 [Candida albicans SC5314]
orf19.2170	2784	6465	3316	249.426	122.272	-1.02852	Down	1.68402e-258	1.84849e-257	GO:0044464//cell part	-	-	gi|68479922|ref|XP_716011.1|/0/hypothetical protein CaO19.2170 [Candida albicans SC5314]
orf19.6175	624	573	294	98.6309	48.3663	-1.02804	Down	1.69403e-24	9.42428e-24	-	-	-	gi|68490474|ref|XP_710931.1|/3.85315e-106/hypothetical protein CaO19.6175 [Candida albicans SC5314]
orf19.6968	3462	2987	1533	92.6725	45.4564	-1.02766	Down	2.33798e-120	2.12398e-119	-	-	-	gi|68482729|ref|XP_714674.1|/0/hypothetical protein CaO19.6968 [Candida albicans SC5314]
orf19.1505	1038	356	183	36.8379	18.0981	-1.02535	Down	9.6158e-16	4.60023e-15	-	-	-	gi|68466711|ref|XP_722551.1|/2.88656e-78/hypothetical protein CaO19.1505 [Candida albicans SC5314]
orf19.25	972	319	164	35.2507	17.3204	-1.02518	Down	2.93972e-14	1.3245e-13	-	GO:0016741	GO:0006730//one-carbon metabolic process	gi|68488647|ref|XP_711832.1|/4.65082e-168/likely tRNA guanine methyltransferase [Candida albicans SC5314]
orf19.6236	630	177	91	30.177	14.8279	-1.02513	Down	1.54208e-08	3.44348e-08	-	GO:0005488//binding	-	gi|68474232|ref|XP_718825.1|/3.06037e-58/hypothetical protein CaO19.6236 [Candida albicans SC5314]
orf19.1578	5169	680	350	14.1301	6.95091	-1.0235	Down	1.4218e-28	8.36659e-28	GO:0044464//cell part	GO:0003676//nucleic acid binding	GO:0010467//gene expression	gi|68466849|ref|XP_722620.1|/0/hypothetical protein CaO19.1578 [Candida albicans SC5314]
orf19.2933	1002	665	343	71.2848	35.1404	-1.02046	Down	7.5114e-28	4.37795e-27	-	-	-	gi|68468747|ref|XP_721432.1|/0/hypothetical protein CaO19.2933 [Candida albicans SC5314]
orf19.1229	3138	736	380	25.1923	12.4311	-1.01902	Down	1.39435e-30	8.38254e-30	GO:0043231//intracellular membrane-bounded organelle	GO:0005049//nuclear export signal receptor activity;GO:0022892	GO:0015031//protein transport	gi|238878799|gb|EEQ42437.1|/0/conserved hypothetical protein [Candida albicans WO-1]
orf19.6230	1176	249	129	22.7423	11.2606	-1.01409	Down	2.86206e-11	7.26386e-11	-	GO:0004518//nuclease activity	GO:0006396//RNA processing	gi|74586553|sp|Q5AAT0.3|DOM3Z_CANAL/0/RecName: Full=Protein RAI1
orf19.3679	1011	936	485	99.4415	49.246	-1.01384	Down	3.94562e-38	2.55275e-37	-	-	-	gi|68484627|ref|XP_713773.1|/1.76114e-141/hypothetical protein CaO19.3679 [Candida albicans SC5314]
orf19.1201	1491	802	416	57.7749	28.6415	-1.01234	Down	7.77868e-33	4.78941e-32	GO:0044424//intracellular part	GO:0004812//aminoacyl-tRNA ligase activity;GO:0032559	GO:0006418//tRNA aminoacylation for protein translation	gi|68487382|ref|XP_712462.1|/0/hypothetical protein CaO19.8792 [Candida albicans SC5314]
orf19.1974	780	17595	9131	2422.91	1201.72	-1.01164	Down	0	0	-	GO:0016772//transferase activity, transferring phosphorus-containing groups;GO:0008238//exopeptidase activity	GO:0006796//phosphate-containing compound metabolic process	gi|68480711|ref|XP_715736.1|/8.53791e-137/hypothetical protein CaO19.1974 [Candida albicans SC5314]
orf19.2268	1719	5778	3001	361.031	179.213	-1.01045	Down	1.20149e-224	1.27533e-223	-	GO:0004672//protein kinase activity;GO:0032559	GO:0006464//protein modification process	gi|68482452|ref|XP_714858.1|/0/likely protein kinase [Candida albicans SC5314]
orf19.2959.1	174	204	106	125.928	62.537	-1.00982	Down	1.97788e-09	4.62438e-09	GO:0031224//intrinsic to membrane	-	-	gi|238879252|gb|EEQ42890.1|/6.3576e-20/hypothetical protein CAWG_01113 [Candida albicans WO-1]
orf19.215	1749	1603	834	98.4434	48.9504	-1.00797	Down	1.84033e-63	1.38398e-62	-	GO:0016772//transferase activity, transferring phosphorus-containing groups	GO:0006796//phosphate-containing compound metabolic process	gi|68487077|ref|XP_712599.1|/0/potential TOR2 kinase complex component [Candida albicans SC5314]
orf19.1330	1821	98	51	5.78041	2.87502	-1.0076	Down	3.42148e-05	6.1982e-05	-	-	-	gi|68488954|ref|XP_711670.1|/0/hypothetical LPF family protein 15 [Candida albicans SC5314]
orf19.501	1857	1080	563	62.4676	31.1227	-1.00514	Down	3.8646e-43	2.57387e-42	-	GO:0003676//nucleic acid binding;GO:0008168//methyltransferase activity	GO:0042254//ribosome biogenesis;GO:0006730//one-carbon metabolic process	gi|68476951|ref|XP_717453.1|/0/hypothetical protein CaO19.8131 [Candida albicans SC5314]
orf19.2237.1	606	111	58	19.674	9.82507	-1.00175	Down	1.13199e-05	2.12626e-05	-	-	-	gi|241951742|ref|XP_002418593.1|/7.22585e-46/conserved hypothetical protein [Candida dubliniensis CD36]
orf19.730	2640	696	364	28.3171	14.1539	-1.00047	Down	3.43208e-28	2.00801e-27	GO:0044464//cell part	-	GO:0007165//signal transduction	gi|68485987|ref|XP_713112.1|/0/potential Rho GTPase activator [Candida albicans SC5314]
Note:
White cells of CY110 were grown in liquid Lee’s glucose medium at 25°C. Opaque cells were grown in liquid Lee’s GlcNAc medium at 25°C since the opaque phenotype was only stable in GlcNAc containing medium. RNA-Seq was performed by BGI (Shenzhen) according to the company’s protocol.

## Sheet: metabolism related genes
Results of the differentially expressed ORFs related to metabolisms.
Gene ID	Gene names	descriptions	log2 Ratio(CY110_OP/CY110_wh)	Up-Down-Regulation(CY110_OP/CY110_wh)
Carbohydrate metabolism
orf19.3733	IDP2	Isocitrate dehydrogenase; expression is regulated upon white-opaque switching; shows colony morphology-related gene regulation by Ssn6p; protein present in exponential and stationary growth phase yeast cultures; Hap43p-repressed gene	2.9162	Up
orf19.7481	MDH1	Uncharacterized,Malate dehydrogenase, mitochondrial; transcription regulated by Mig1p, Tup1p, white-opaque switching; induced in high iron, biofilm; regulated upon phagocytosis; antigenic during murine and human infection	1.10147	Up
orf19.5323	MDH1-3	Uncharacterized,Predicted malate dehydrogenase; farnesol regulated; protein present in exponential and stationary growth phase yeast; Hap43p-repressed gene	1.14012	Up
orf19.4602	MDH1-1	Predicted malate dehydrogenase precursor; macrophage-induced transcript; protein present in exponential and stationary growth phase yeast cultures	1.74367	Up
orf19.3931	SFC1	Putative succinate-fumarate transporter; gene is involved in repression of growth on sorbose; alkaline upregulated; transcription is upregulated in both intermediate and mature biofilms	3.24766	Up
orf19.2156	NAG1	Glucosamine-6-phosphate deaminase; N-acetylglucosamine utilization enzyme; required for normal hyphal growth and mouse virulence; converts glucosamine 6-P to fructose 6-P; reaction is reversible in vitro; gene and protein is GlcNAc-induced	6.7555	Up
orf19.2158	NAG3	Putative transporter of the major facilitator superfamily (MFS); similar to Nag4p; required for wild-type mouse virulence and cycloheximide resistance; in gene cluster that includes genes encoding enzymes of GlcNAc catabolism	-1.69219	Down
orf19.2160	NAG4	Putative transporter; fungal-specific; similar to Nag3p and to S. cerevisiae Ypr156Cp and Ygr138Cp; required for wild-type mouse virulence and wild-type cycloheximide resistance; gene cluster encodes enzymes of GlcNAc catabolism	1.10069	Up
orf19.7668	CaMAL2	Alpha-glucosidase that hydrolyzes sucrose; required for sucrose utilization; transcriptionally regulated by Suc1p; expression induced by maltose, repressed by glucose; transposon mutation affects filamentous growth; upregulated in RHE model	1.1199	Up
orf19.4279	MNN1	Putative alpha-1,3-mannosyltransferase, a component of mannosyltransferase complex; transcription negatively regulated by Rim101p; transcription elevated in chk1 and nik1 null mutants, but not in sln1 null mutant; biofilm-induced gene	6.85513	Up
orf19.5658	MNN10	Uncharacterized,Ortholog(s) have alpha-1,6-mannosyltransferase activity, role in barrier septum assembly and alpha-1,6-mannosyltransferase complex localization	1.15555	Up
orf19.3803	MNN22	Uncharacterized,Putative Golgi alpha-1,2-mannosyltransferase; regulated by Tsa1p, Tsa1Bp in minimal media at 37 deg; Hog1p-induced; induced by nitric oxide; downregulated in core stress response; planktonic growth-induced gene	-4.73491	Down
orf19.2881	MNN4	Protein required for normal mannosylphosphorylation of oligosaccharides linked to cell wall proteins, not required for virulence or kidney colonization in mouse systemic infection or for normal interaction with macrophages	-2.55707	Down
orf19.5557	MNN4-4	Mannosyltransferase; transcription is upregulated in a mutant lacking the Ssk1p response regulator proteinor in a nik1 homozygous null mutant, but not in chk1 or sln1 null mutants; pheromone induced; planktonic growth-induced	-1.8411	Down
orf19.1701	RKI1	Ortholog(s) have ribose-5-phosphate isomerase activity, role in pentose-phosphate shunt, pyridoxine biosynthetic process and cytoplasm, nucleus localization	2.21782	Up
orf19.5307	JEN2	Dicarboxylic acid transporter; regulated by glucose repression; induced by Rgt1p; transcription is upregulated in both intermediate and mature biofilms; disruptants not obtained by UAU1 method	4.37325	Up
orf19.5000	CYB2	Putative cytochrome b2 precursor protein; transcriptionally regulated by iron; expression greater in high iron; alkaline downregulated; shows colony morphology-related gene regulation by Ssn6p; Hap43p-repressed	1.70658	Up
orf19.742	ALD6	Putative aldehyde dehydrogenase; stationary phase enriched protein; expression regulated upon white-opaque switch; transcription is upregulated in both intermediate and mature biofilms	4.71905	Up
orf19.6167	AYR1	Uncharacterized,Putative oxidoreductase; transcriptionally induced by interaction with macrophage	1.23332	Up
orf19.5615	AYR2	Uncharacterized,Putative NADPH-dependent 1-acyl dihydroxyacetone phosphate reductase; shows colony morphology-related gene regulation by Ssn6p	1.22555	Up
orf19.2608	ADH5	Putative alcohol dehydrogenase; regulated by white-opaque switching; fluconazole-induced; antigenic in murine infection; regulated by Nrg1p, Tup1p; Hap43p-repressed, macrophage-downregulated protein; biofilm- and planktonic growth-induced	-1.85703	Down
orf19.4505	ADH3	Putative NAD-dependent (R,R)-butanediol dehydrogenase; expression is regulated upon white-opaque switching; induced by nitric oxide independent of Yhb1p	1.51964	Up
orf19.7093	HGT13	Predicted sugar transporter, involved in glycerol utilization; member of the major facilitator superfamily; 12 transmembrane; gene has intron; oxidative stress-induced via Cap1p; expressed in rich medium, 2% glucose	4.62274	Up
orf19.3668	HGT2	Putative glucose transporter of the major facilitator superfamily; the C. albicans glucose transporter family comprises 20 members; 12 probable membrane-spanning segments; expressed in rich medium with 2% glucose	3.37108	Up
orf19.4833	MLS1	Malate synthase; glyoxylate cycle enzyme; no mammalian homolog; transcription induced upon phagocytosis by macrophage; regulated upon white-opaque switching; biofilm-repressed; strong oxidative stress induced; stationary phase enriched	2.89041	Up
orf19.1655	PXP2	Putative acyl-CoA oxidase; enzyme of fatty acid beta-oxidation; induced during macrophage infection; expression is opaque specific; has putative peroxisome targeting signal	2.86211	Up
orf19.1587	HGT20	Putative glucose transporter of the major facilitator superfamily; the C. albicans glucose transporter family comprises 20 members; 12 probable membrane-spanning segments; regulated by Nrg1p	2.28952	Up
orf19.6141	HGT16	Putative glucose transporter of the major facilitator superfamily; the C. albicans glucose transporter family comprises 20 members; 12 probable membrane-spanning segments; gene has intron; expressed in rich medium with 2% glucose	1.67165	Up
orf19.2023	HGT7	Putative glucose transporter, major facilitator superfamily; glucose-, fluconazole-, Snf3p-induced, expressed at high glucose; upregulated in biofilm; C. albicans glucose transporter family comprises 20 members; 12 TM regions predicted	-10.637	Down
orf19.2020	HGT6	Putative high-affinity major facilitator superfamily glucose transporter; 20 family members; 12 probable membrane-spanning segments; core stress response, fluconazole-induced; biofilm-induced; induced in oralpharyngeal candidasis	-8.65268	Down
orf19.2021	HGT8	High-affinity glucose transporter of the major facilitator superfamily; 20 members in the C. albicans glucose transporter family; 12 probable membrane-spanning segments; gene has intron; expressed in rich medium; biofilm-induced	-6.70165	Down
orf19.5447	HGT19	Putative glucose/myo-inositol transporter of major facilitator superfamily; 12 transmembrane segments, extended N terminus; expressed in rich medium; Hap43p-, phagocytosis-, biofilm; induced; 20 member C. albicans glucose transporter family	-4.98279	Down
orf19.3997	ADH1	Alcohol dehydrogenase; oxidizes ethanol into acetaldehyde; at yeast, but not hyphal cell surface; soluble in hyphae; immunogenic in human/mouse; complements S. cerevisiae adh1 adh2 adh3 mutation; biofilm-, fluconazole-, farnesol-induced	-3.43579	Down
orf19.5753	HGT10	Glycerol permease involved in glycerol uptake; member of the major facilitator superfamily; induced by osmotic stress, at low glucose in rich media, during cell wall regeneration; 12 membrane spans; Hap43p-induced gene	-2.11495	Down
orf19.2154	HXK1	N-acetylglucosamine (GlcNAc) kinase; involved in GlcNAc utilization; required for wild-type hyphal growth and mouse virulence; gene expression is GlcNAc-induced; induced in response to alpha pheromone in SpiderM medium	5.14696	Up
orf19.542	HXK2	Hexokinase II; antigenic in humans; downregulated by human neutrophils; Efg1p-regulated; biofilm, fluconazole-induced; shows colony morphology-related gene regulation by Ssn6p; protein present in exponential and stationary growth phases	-2.91281	Down
orf19.3967	PFK1	Phosphofructokinase alpha subinit, Pfk1p-Pfk2p heteromultimer; activated by fructose 2,6-bisphosphate, AMP, inhibited by ATP; activity reduced on hyphal induction; phagocytosis-downregulated; fluconazole-induced; biofilm-induced	-3.19303	Down
orf19.6540	PFK2	Phosphofructokinase beta subunit, a Pfk1p-Pfk2p heteromultimer; activated by fructose 2,6-bisphosphate, AMP, inhibited by ATP; downregulated upon phagocytosis or hyphal growth; fluconazole-induced; stationary-phase enriched; biofilm-induced	-3.15531	Down
orf19.3575	CDC19	Pyruvate kinase; on yeast cell surface; Gcn4p, Hog1p, GlcNAc regulated; induced on polystyrene adherence; downregulated by phagocytosis, farnesol treatment; mutation affects filamentation; stationary phase enriched; biofilm, Hap43p-induced	-2.29386	Down
orf19.6640	TPS1	Trehalose-6-phosphate synthase; role in hyphal growth and virulence in mouse systemic infection; upregulated in presence of human neutrophils; macrophage/pseudohyphal-repressed after 16h; stationary phase enriched protein; Hap43p-repressed	-1.81324	Down
orf19.3038	TPS2	Trehalose-6-phosphate (Tre6P) phosphatase; mutant heat sensitive, has Tre6P accumulation, decreased mouse virulence; possible drug target; two conserved phospohydrolase motifs; no mammalian homolog; Hap43p-repressed gene; biofilm-induced	-2.0441	Down
orf19.5348	TPS3	Putative regulatory subunit of trehalose-phosphate synthase; regulated by Efg1p; biofilm-repressed expression; biofilm-induced in another study; regulated by Tsa1p, Tsa1Bp under H2O2 stress conditions	-1.90086	Down
orf19.7214	YBR056	homolog to glucan-1,3--beta-glucosidase	-1.15523	Down
orf19.5437	RHR2	Glycerol 3-phosphatase; roles in osmotic tolerance, glycerol accumulation in response to salt; required for biofilm formation; biofilm-induced; regulated by macrophage, stress response, yeast-hyphal switch, pheromone, GCN4, HOG1, NRG1, TUP1	-4.05045	Down
orf19.6816	YJR096	putative oxidoreductase	-1.79616	Down
orf19.2897	SOU2	Protein similar to Sou1p; not required for utilization of L-sorbose	-1.57121	Down
orf19.1048	IFD6	Aldo-keto reductase family member; similar to aryl alcohol dehydrogenases; increased protein correlates with MDR1 overexpression (but not CDR1 or CDR2) in fluconazole-resistant clinical isolates; farnesol regulated; possibly essential gene	-4.92776	(YPL088=IFD2)
Lipid and fatty acid metabolism
orf19.6445	ECI1	Protein similar to S. cerevisiae Eci1p, which is involved in fatty acid oxidation; transposon mutation affects filamentous growth; expression is regulated upon white-opaque switching	1.43521	Up
orf19.1288	FOX2	3-hydroxyacyl-CoA epimerase, required for fatty acid beta-oxidation; upregulated upon phagocytosis; transcription regulated by Mig1p, by white-opaque switching and by DNA methylation; transcriptional activation by oleate requires Ctf1p	2.60615	Up
orf19.5723	POX1	Predicted acyl-CoA oxidase; expression is regulated upon white-opaque switching; upregulated upon phagocytosis	2.17697	Up
orf19.1704	FOX3	Putative peroxisomal 3-oxoacyl CoA thiolase; expression is regulated upon white-opaque switching	1.80915	Up
orf19.3029	YDR036	Ortholog(s) have 3-hydroxyisobutyryl-CoA hydrolase activity and mitochondrion localization	1.91196	Up
orf19.6830	YDR036	Putative enoyl-CoA hydratase	1.54326	Up
orf19.6254	YPR128/ANT1	Ortholog(s) have adenine nucleotide transmembrane transporter activity, role in ATP transport, fatty acid beta-oxidation, peroxisome organization and integral to peroxisomal membrane localization	2.67884	Up
orf19.4157	SPS20(SPS19)	Peroxisomal 2,4-dienoyl-CoA reductase; stationary phase enriched protein	2.21471	Up
orf19.1709	PXP18	lipid transfer; sterol carrier protein 2; similar to Candida tropicalis non-specific lipid-transfer protein	3.76806	Up
orf19.4551	CTN1(YAT1)	Predicted carnitine acetyl transferase; required for growth on nonfermentable carbon sources but not for hyphal growth or virulence in mouse systemic model; transcription induced in macrophage; macrophage/pseudohyphal-repressed after 16 hr	2.23724	Up
orf19.2809	CTN3(YAT2)	Predicted peroxisomal carnitine acetyl transferase; Ura+ deletion strain has no obvious metabolic, hyphal, or virulence defects; transcription induced by macrophage engulfment, hyphal growth, starvation, or nonfermentable carbon sources	3.92418	Up
orf19.6143	FAO1	long chain fatty acid oxidase	3.23236	Up
orf19.4933	FAD3(FAD1)	Omega-3 fatty acid desaturase, involved in production of alpha-linolenic acid, which is a major component of membranes; caspofungin induced; Plc1p-regulated; shows colony morphology-related gene regulation by Ssn6p	4.56986	Up
orf19.3330.3	POX18	Protein not essential for viability; similar to Candida maltosa Pox18p, which is a peroxisomal protein; Assembly 21 sequence was updated based on comparative genome analysis and new sequence data, and allelic orf19.10841 was reinstated	11.9141	Up
orf19.4121	TES99	Has domain(s) with predicted role in acyl-CoA metabolic process	4.34972	Up
orf19.1317	OSH3	Protein required for wild-type filamentation; has oxysterol binding protein domain and pleckstrin homology motif; overproducton suppresses cph1 homozygous null filamnetation defect; similar to S. cerevisiae Osh3p	1.24461	Up
orf19.6026	ERG2	C-8 sterol isomerase; enzyme of ergosterol biosynthesis pathway; converts fecosterol to episterol; mutant is hypersensitive to multiple drugs; ketoconazole-induced	1.56805	Up
orf19.125	EBP1	NADPH oxidoreductase; interacts with phenolic substrates such as 17beta-estradiol; possible role in estrogen response; induced by oxidative, weak acid stress, nitric oxide, benomyl, GlcNAc; activated by Cap1p, Mnl1p; Sko1p; Hap43p-repressed	-2.35482	Down
orf19.857	FMO2(MOC1)	Predicted ORF in Assemblies 19, 20 and 21; expression regulated during planktonic growth	1.89404	Up
orf19.4777	DAK2	Putative dihydroxyacetone kinase; transcription decreases upon yeast-hyphal switch; fluconazole-induced; caspofungin repressed; protein enriched in stationary phase yeast cultures; biofilm- and planktonic growth-induced gene	-4.16245	Down
orf19.5818	SUR2	Putative ceramide hydroxylase; predicted enzyme of sphingolipid biosynthesis; biofilm- and planktonic growth-induced; regulated by Tsa1p, Tsa1Bp under H2O2 stress conditions	-2.73236	Down
orf19.7379	FAA2	Putative acyl CoA synthetase; expression is regulated upon white-opaque switching; transcription is upregulated in both intermediate and mature biofilms	-2.10029	Down
orf19.4631	ERG25	C-4 sterol methyl oxidase with a role in ergosterol biosynthesis; Hap43p-induced; ketoconazole-induced; amphotericin B, caspofungin repressed; possibly an essential gene, disruptants not obtained by UAU1 method	-1.91117	Down
orf19.1979	GIT3(GIT1)	Uncharacterized，Putative glycerophosphoinositol permease; fungal-specific (no human/murine homolog); alkaline downregulated; transcription specific to white cell type; caspofungin, macrophage/pseudohyphal-repressed; biofilm-induced	-9.30611	Down
orf19.1978	GIT2	Putative glycerophosphoinositol permease; fungal-specific (no human or murine homolog); transcription is repressed in response to alpha pheromone in SpiderM medium; Hap43p-repressed gene	5.25661	Up
Nitrogen, sulfur and amino acid metabolism
orf19.3418	RAF1	Ortholog(s) have endoplasmic reticulum, fungal-type vacuole localization	2.44926	Up
[truncated: 128 more rows]

## Sheet: specific genes in a-alpha
Results of the differentially expressed ORFs only found in the a/alpha strain, 2<log2 Ratio(OP_RPKM/Wh_RPKM)<-2) .
[truncated: 190 more rows]

[truncated: 1 more sheets: all.gene.rpkm]
